# Supplementary material
Source: PubMed Central journal article supplement (PMC6580556)

## Supporting Information

# Synthesis and Optimization of K<sub>v</sub>7 (KCNQ) Potassium Channel Agonists: The Role of Fluorines in Potency and Selectivity

Ruiting Liu,<sup>†</sup> Thanos Tzounopoulos,<sup>‡</sup> Peter Wipf<sup>†,\*</sup>

<sup>†</sup>Department of Chemistry, University of Pittsburgh, Pittsburgh, PA 15260

<sup>‡</sup>Department of Otolaryngology, School of Medicine, University of Pittsburgh, Pittsburgh, PA 15260

### Table of Contents

|                                                                                                                                      |    |
|--------------------------------------------------------------------------------------------------------------------------------------|----|
| General Experimental Protocols.....                                                                                                  | 2  |
| Synthesis Procedures and Compound Characterizations .....                                                                            | 3  |
| Diethyl (4,4'-diamino-6,6'-bis((4-fluorobenzyl)amino)-[1,1'-biphenyl]-3,3'-diyl)dicarbamate ( <b>2</b> ) .....                       | 3  |
| Ethyl (2-amino-3-fluoro-4-((4-(trifluoromethyl)benzyl)amino)phenyl)carbamate ( <b>RL-81</b> ) .....                                  | 4  |
| Ethyl (2-amino-3-fluoro-5-(trifluoromethyl)-4-((4-(trifluoromethyl)benzyl)amino)phenyl)carbamate ( <b>RL-073</b> ).....              | 5  |
| Isopropyl (2-amino-3-fluoro-4-((4-(trifluoromethyl)benzyl)amino)phenyl)carbamate ( <b>RL-32</b> ).....                               | 6  |
| Cyclopropyl (2-amino-3-fluoro-4-((4-(trifluoromethyl)benzyl)amino)phenyl)carbamate ( <b>RL-56</b> ).....                             | 8  |
| Ethyl (2-amino-3-fluoro-4-((3-(trifluoromethyl)benzyl)amino)phenyl)carbamate ( <b>RL-73</b> ) .....                                  | 10 |
| Ethyl (2-amino-3-fluoro-4-((3-(pentafluoro-λ <sup>6</sup> -sulfanyl)benzyl)amino)phenyl)carbamate ( <b>RL-02</b> ) .....             | 12 |
| Ethyl (2-amino-5-fluoro-4-((4-(trifluoromethyl)benzyl)amino)phenyl)carbamate ( <b>RL-72</b> ) .....                                  | 14 |
| Ethyl (2-amino-3-fluoro-4-((2-fluoro-4-(trifluoromethyl)benzyl)amino)phenyl)carbamate ( <b>RL-18</b> ).....                          | 16 |
| Cyclopropyl (2-amino-3-fluoro-4-((2-fluoro-4-(trifluoromethyl)benzyl)amino)phenyl)carbamate ( <b>RL-35</b> )                         | 16 |
| Cyclopropyl (2-amino-3,5-difluoro-4-((2-fluoro-4-(trifluoromethyl)benzyl)amino)phenyl)carbamate ( <b>RL-36</b> ).....                | 18 |
| Cyclopropyl (2-amino-3,6-difluoro-4-((2-fluoro-4-(trifluoromethyl)benzyl)amino)phenyl)carbamate ( <b>RL-46</b> ).....                | 21 |
| Cyclopropyl (2-amino-3,5,6-trifluoro-4-((2-fluoro-4-(trifluoromethyl)benzyl)amino)phenyl)carbamate ( <b>RL-50</b> ).....             | 23 |
| Ethyl (2-amino-3-fluoro-4-(((5-(trifluoromethyl)pyridin-2-yl)methyl)amino)phenyl)carbamate ( <b>RL-31</b> ) ...                      | 25 |
| Cyclopropyl (2-amino-3-fluoro-4-(((5-(trifluoromethyl)pyridin-2-yl)methyl)amino)phenyl)carbamate ( <b>RL-68</b> ).....               | 26 |
| Cyclopropyl (2-amino-3-fluoro-4-(((3-fluoro-5-(trifluoromethyl)pyridin-2-yl)methyl)amino)phenyl)carbamate ( <b>RL-96</b> ) .....     | 28 |
| Cyclopropyl (2-amino-3,5-difluoro-4-(((3-fluoro-5-(trifluoromethyl)pyridin-2-yl)methyl)amino)phenyl)carbamate ( <b>RL-01</b> ) ..... | 30 |
| Cyclopropyl (2-amino-3,6-difluoro-4-(((3-fluoro-5-(trifluoromethyl)pyridin-2-yl)methyl)amino)phenyl)carbamate ( <b>RL-12</b> ) ..... | 31 |
| Ethyl (2-amino-3-fluoro-4-(((6-(trifluoromethyl)pyridin-3-yl)methyl)amino)phenyl)carbamate ( <b>RL-24</b> ) ...                      | 33 |
| Cyclopropyl (2-amino-3-fluoro-4-(((6-(trifluoromethyl)pyridin-3-yl)methyl)amino)phenyl)carbamate ( <b>RL-67</b> ).....               | 34 |
| Ethyl (2-amino-4-(((6-cyano-5-(trifluoromethyl)pyridin-2-yl)methyl)amino)-3-fluorophenyl)carbamate ( <b>RL-23</b> ).....             | 36 |
| Metabolic Stability Properties of Selected Analogs in Liver Microsomes.....                                                          | 38 |
| Lilly OIDD Screening Materials and Methods.....                                                                                      | 40 |
| Dihedral Angle Analysis of <b>RL-50</b> and <b>RL-46</b> .....                                                                       | 42 |
| Copies of <sup>1</sup> H NMR and <sup>13</sup> C NMR Spectra.....                                                                    | 43 |

## General Experimental Protocols

All non-aqueous reactions were carried out under a nitrogen atmosphere in oven-dried glassware. Anhydrous tetrahydrofuran and diethyl ether were distilled from sodium benzophenone ketyl. Anhydrous dichloromethane, toluene and xylene were distilled from CaH<sub>2</sub>. 1,4-dioxane, and MeOH, and MeCN were dried over 3 Å molecular sieves unless otherwise noted. Other solvents and reagents were used as obtained from commercial sources without further purification unless noted. Reactions were monitored via TLC using 250 µm pre-coated silica gel 60 F<sub>254</sub> plates, which were visualized with 254 nm and/or 365 nm UV light. Flash chromatography was performed with SiliCycle silica gel 60 (230-400 mesh). <sup>1</sup>H, <sup>13</sup>C and <sup>19</sup>F NMR spectra were recorded on Bruker Avance 400, 500 or 600 MHz spectrometers, using the residual solvent as an internal standard. Melting points were obtained using a Laboratory Devices Mel-Temp II with open capillaries and are uncorrected. IR spectra were obtained on a PerkinElmer Spectrum 100 FT-IR. HRMS data were obtained on a Thermo Scientific Exactive Orbitrap LC-MS using heated electrospray ionization (HESI). X-Ray crystallography analysis was performed on Bruker X8 APEX X-ray diffractometer. All screening samples were analyzed by LC-HRMS prior to submission, and passed purity requirements (>95% by UV/ELS detection). LC-HRMS and ELS data were obtained on a Thermo Scientific Exactive Orbitrap LC-HRMS (ESI positive ion mode) coupled to an Agilent Technologies 385-ELSD and a Thermo Scientific Accela HPLC system using a 3.5 µm Waters XTerra C18 column (2.1 x 50 mm; 10 min gradient elution with MeCN/H<sub>2</sub>O/MeOH containing 0.1% formic acid at a flow rate of 500 µL/min from 3:92:5 at 0-0.5 min to 93:2:5 at 4.0 min, back to 3:92:5 from 6.0 to 7.5 min).

Metabolic stability in pooled human and male mouse liver microsomes, and bidirectional permeability in the MDCK-MDR1 cell line, were determined at Pharmaron.

## Synthesis Procedures and Compound Characterizations

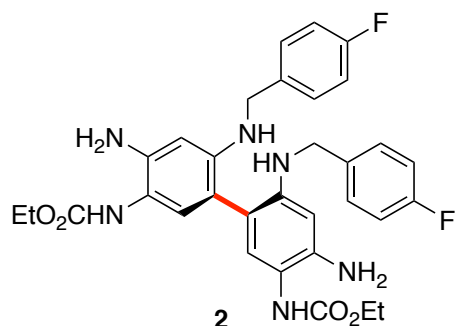

**Diethyl (4,4'-diamino-6,6'-bis((4-fluorobenzyl)amino)-[1,1'-biphenyl]-3,3'-diyl)dicarbamate (2).** To a solution of retigabine **1** (1.22 g, 4.02 mmol) in CH<sub>2</sub>Cl<sub>2</sub> (300 mL) was added (diacetoxyiodo)benzene (0.648 g, 2.01 mmol) in one portion. The reaction mixture was stirred at room temperature for 2 h. The resulting purple solution was quenched with saturated Na<sub>2</sub>CO<sub>3</sub>, extracted with CH<sub>2</sub>Cl<sub>2</sub> (3 x 30 mL), dried (Na<sub>2</sub>SO<sub>4</sub>), filtered, and concentrated in vacuo. The residue was purified by chromatography on SiO<sub>2</sub> (EtOAc/hexanes, 3:7 to 1:1) to afford **2** as a purple solid (0.334 g, 27%). Recrystallization from CH<sub>2</sub>Cl<sub>2</sub>/hexanes afford a yellowish solid: Mp 180.2-184.4 °C; IR (ATR) 3355, 1699, 1623, 1509, 1224, 1062, 827 cm<sup>-1</sup>; <sup>1</sup>H NMR (500 MHz, CDCl<sub>3</sub>) δ 7.19 (dd, 4 H, *J* = 8.3, 5.5 Hz), 6.94 (t, 4 H, *J* = 8.6 Hz), 6.81 (s, 2 H), 6.13 (brs, 2 H), 5.96 (s, 2 H), 4.21 (s, 4 H), 4.17 (q, 4 H, *J* = 7.0 Hz), 3.92 (brs, 6 H), 1.38-1.09 (m, 6 H); <sup>13</sup>C NMR (125 MHz, CDCl<sub>3</sub>) δ 161.9 (d, *J* = 245.1 Hz), 155.6, 145.6, 142.9, 135.2 (d, *J* = 3.0 Hz), 130.1, 128.6 (d, *J* = 8.1 Hz), 115.5 (d, *J* = 21.3 Hz), 114.6, 113.5, 99.3, 61.5, 47.5, 14.7; HRMS (HESI) *m/z* calcd for C<sub>32</sub>H<sub>35</sub>N<sub>6</sub>O<sub>4</sub>F<sub>2</sub> [M+H]<sup>+</sup> 605.2682, found 605.2682.

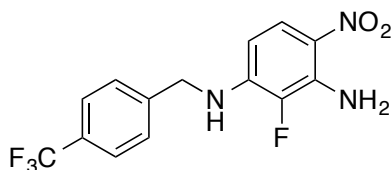

**2-Fluoro-4-nitro-*N*<sup>1</sup>-(4-(trifluoromethyl)benzyl)benzene-1,3-diamine (5a).** To a stirred solution of 2,3-difluoro-6-nitroaniline **4a** (1.10 g, 6.15 mmol) in dry DMSO (6 mL) was added 4-(trifluoromethyl)benzylamine **3a** (1.00 g, 5.60 mmol) followed by Et<sub>3</sub>N (0.94 mL, 6.71 mmol) and I<sub>2</sub> (28 mg, 0.11 mmol). The reaction mixture was heated to 120 °C for

36 h, cooled to room temperature, diluted with water (50 mL) and extracted with EtOAc (3 x 30 mL). The combined organic layers were washed with brine, dried (Na<sub>2</sub>SO<sub>4</sub>), filtered and concentrated under reduced pressure. The residue was recrystallized from acetone/hexanes to afford **5a** (1.20 g). The filtrate was concentrated and purified by chromatography on SiO<sub>2</sub> (acetone/hexanes, 1:8 to 1:4 to 1:3, containing Et<sub>3</sub>N (1%)) to afford an additional batch of **5a** (0.34 g; total amount 1.54 g, 84%) as a yellow solid: Mp 165.4-166.7 °C; IR (ATR) 3487, 3377, 1629, 1549, 1480, 1411, 1329, 1275, 1236, 1200, 1178, 1154, 1090, 1066, 1016, 787, 755 cm<sup>-1</sup>; <sup>1</sup>H NMR (500 MHz, CDCl<sub>3</sub>) δ 7.86 (dd, 1 H, *J* = 9.5, 1.0 Hz), 7.63 (d, 2 H, *J* = 8.0 Hz), 7.44 (d, 2 H, *J* = 8.0 Hz), 6.00-6.12 (m, 3 H), 4.94 (brs, 1 H), 4.55 (d, 2 H, *J* = 6.0 Hz); <sup>13</sup>C NMR (100 MHz, acetone-d<sub>6</sub>) δ 144.2 (app d, *J* = 1.0 Hz), 141.5 (d, *J* = 9.0 Hz), 137.6 (d, *J* = 227.0 Hz), 135.8 (d, *J* = 13.0 Hz), 128.8 (q, *J* = 32.0 Hz), 127.6, 125.4 (q, *J* = 4.0 Hz), 124.5 (d, *J* = 4.0 Hz), 124.5 (q, *J* = 269.0 Hz), 122.9 (d, *J* = 2.0 Hz), 100.7 (d, *J* = 4.0 Hz), 45.5; <sup>19</sup>F NMR (376 MHz, CDCl<sub>3</sub>) δ -62.9 (s, 3 F), -160.7 (s, 1 F); HRMS (HESI) *m/z* calcd for C<sub>14</sub>H<sub>12</sub>N<sub>3</sub>O<sub>2</sub>F<sub>4</sub> [M+H]<sup>+</sup> 330.0860, found 330.0858.

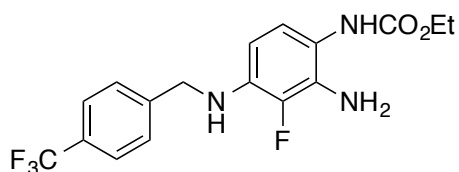

**Ethyl (2-amino-3-fluoro-4-((4-(trifluoromethyl)benzyl)amino)phenyl)carbamate (RL-81).** To a solution of **5a** (0.066 g, 0.2 mmol) in MeOH (0.5 mL) was added zinc powder (0.066 g, 1.00 mmol) followed by the dropwise addition of a solution of saturated ammonium chloride (0.19 mL). The reaction mixture was stirred vigorously at room temperature for 5 h and filtered through celite. The celite was washed with EtOAc and the aqueous solution was extracted with EtOAc (3 x 2 mL). The combined organic layers were dried (Na<sub>2</sub>SO<sub>4</sub>) and concentrated to afford 3-fluoro-*N*<sup>4</sup>-(4-(trifluoromethyl)benzyl)benzene-1,2,4-triamine as a dark red solid that was used in the next step without further purification.

An oven-dried 5-mL round bottomed flask equipped with a magnetic stir bar under argon was charged at 0 °C with 3-fluoro-*N*<sup>4</sup>-(4-(trifluoromethyl)benzyl)benzene-1,2,4-triamine, CH<sub>2</sub>Cl<sub>2</sub> (1 mL) and DIPEA (0.043 mL, 0.25 mmol). Ethyl chloroformate (0.02 mL, 0.20 mmol) was added dropwise via syringe at 0 °C. The reaction mixture was stirred for 1 h at 0 °C and

then for 3 h at room temperature, quenched with water, and extracted with CH<sub>2</sub>Cl<sub>2</sub> (3 x 5 mL). The combined organic extracts were dried (Na<sub>2</sub>SO<sub>4</sub>) and concentrated under reduced pressure. The residue was purified by chromatography on SiO<sub>2</sub> (EtOAc/hexanes, 1:4 to 2:3) to afford a dark red solid that was recrystallized (CH<sub>2</sub>Cl<sub>2</sub>/hexanes) to give **RL-81** (0.035 g, 47%) as colorless crystals: Mp 171.4-172.2 °C; IR (ATR) 3400, 3338, 3299, 1676, 1644, 1618, 1528, 1489, 1478, 1443, 1323, 1249, 1158, 1113, 1103, 826, 781, 775, 768, 673 cm<sup>-1</sup>; <sup>1</sup>H NMR (400 MHz, CDCl<sub>3</sub>) δ 7.59 (d, 2 H, *J* = 8.0 Hz), 7.46 (d, 2 H, *J* = 8.0 Hz), 6.73 (d, 1 H, *J* = 8.4 Hz), 6.13 (br s, 1 H), 5.99 (t, 1 H, *J* = 8.8 Hz), 4.42 (s, 2 H), 4.33 (br s, 1 H), 4.19 (q, 2 H, *J* = 7.2 Hz), 3.86 (br s, 2 H), 1.29 (t, 3 H, *J* = 7.2 Hz); <sup>13</sup>C NMR (100 MHz, acetone-d<sub>6</sub>) δ 156.0, 146.4, 141.7 (d, *J* = 227.7 Hz), 135.4, 132.5, 129.3 (q, *J* = 32.0 Hz), 128.5, 126.1 (q, *J* = 3.9 Hz), 125.5 (q, *J* = 271.0 Hz), 122.3, 116.4, 101.3, 61.2, 47.4, 15.0; <sup>19</sup>F NMR (471 MHz, CDCl<sub>3</sub>) δ -62.5 (s, 3 F), -156.1 (s, 1 F); HRMS (HESI) *m/z* calcd for C<sub>17</sub>H<sub>18</sub>N<sub>3</sub>O<sub>2</sub>F<sub>4</sub> [M+H]<sup>+</sup> 372.1330, found 372.1327.

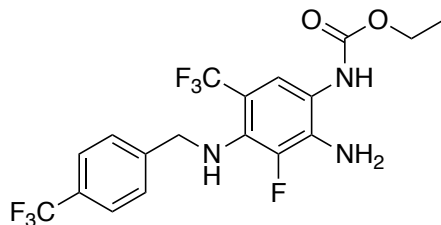

**Ethyl (2-amino-3-fluoro-5-(trifluoromethyl)-4-((4-(trifluoromethyl)benzyl)amino)phenyl)carbamate (RL-073).** To an oven dried microwave vial fitted with a stir bar was added 1-trifluoromethyl-1,2-benziodoxol-3-(1*H*)-one **6** (0.332 g, 1.05 mmol) and **RL-81** (0.260 g, 0.700 mmol). The vial was evacuated and filled with N<sub>2</sub> (3x), followed by dry CH<sub>3</sub>CN (14 mL). The reaction mixture was stirred for 5 h at 85 °C, concentrated in vacuo, and diluted with EtOAc and saturated Na<sub>2</sub>CO<sub>3</sub>. The aqueous layer was extracted with EtOAc (3 x 5 mL), dried (Na<sub>2</sub>SO<sub>4</sub>), and concentrated in vacuo. The residue was purified by chromatography on SiO<sub>2</sub> (EtOAc/hexanes, 1:4 to 3:7, containing Et<sub>3</sub>N(1%)) to afford a yellow oil that was purified by another chromatography on SiO<sub>2</sub> (20% EtOAc/hexanes, 1:4 to 1:3, containing Et<sub>3</sub>N (1%)). A third chromatography on SiO<sub>2</sub> (EtOAc/hexanes, 1:4, containing Et<sub>3</sub>N (1%)) of slightly less pure fractions provided an additional batch of product, and the combined fractions were recrystallized from CH<sub>2</sub>Cl<sub>2</sub>/hexanes to afford **RL-073** (0.052 g, 17%) as a white solid: Mp 107.8 -108.6 °C; IR

(ATR) 3371, 2986, 1703, 1642, 1492, 1324, 1225, 1158, 1108, 1066  $\text{cm}^{-1}$ ;  $^1\text{H}$  NMR (500 MHz,  $\text{CDCl}_3$ )  $\delta$  7.59 (d, 2 H,  $J = 8.0$  Hz), 7.47 (d, 2 H,  $J = 8.0$  Hz), 7.10 (s, 1 H), 6.09 (brs, 1 H), 4.55 (s, 2 H), 4.21 (q, 2 H,  $J = 7.0$  Hz), 4.14 (br s, 3 H), 1.30 (t, 3 H,  $J = 7.0$  Hz);  $^{13}\text{C}$  NMR (151 MHz,  $\text{CDCl}_3$ )  $\delta$  155.4, 143.8, 142.8 (d,  $J = 232.6$  Hz), 135.8, 133.1 (d,  $J = 9.0$  Hz), 129.7 (q,  $J = 32.3$  Hz), 127.8, 125.7-125.5 (m), 124.7 (qd,  $J = 269.2, 4.2$  Hz), 124.3 (q,  $J = 272.0$  Hz), 120.0, 115.4, 107.6 (d,  $J = 25.8$  Hz), 62.0, 50.8 (d,  $J = 9.5$  Hz), 14.5;  $^{19}\text{F}$  NMR (471 MHz,  $\text{CDCl}_3$ )  $\delta$  -59.3 (s, 3 F), -62.5 (s, 3 F), -146.1 (s, 1 F); HRMS (HESI)  $m/z$  calcd for  $\text{C}_{18}\text{H}_{17}\text{N}_3\text{O}_2\text{F}_7$   $[\text{M}+\text{H}]^+$  440.1204, found 440.1195.

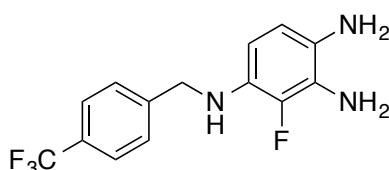

**3-Fluoro- $N^4$ -(4-(trifluoromethyl)benzyl)benzene-1,2,4-triamine.** To a stirred solution of **5a** (0.50 g, 1.52 mmol) in EtOH (5 mL) was added 10% Pd/C (0.082 g, 0.076 mmol) under  $\text{N}_2$ . The reaction mixture was stirred at room temperature for 4 h under a hydrogen atmosphere ( $\text{H}_2$  balloon), and filtered through Celite. The filter cake was washed with  $\text{CH}_2\text{Cl}_2$ , and the combined liquid layers were concentrated in vacuo to afford crude 3-fluoro- $N^4$ -(4-(trifluoromethyl)benzyl)benzene-1,2,4-triamine (0.39 g, 86%) as a red solid that was directly used for the next step:  $^1\text{H}$  NMR (400 MHz,  $\text{CDCl}_3$ )  $\delta$  7.58 (d, 2 H,  $J = 8.0$  Hz), 7.47 (d, 2 H,  $J = 8.0$  Hz), 6.35 (dd, 1 H,  $J = 8.4, 2.0$  Hz), 5.96 (app t, 1 H,  $J = 8.4$  Hz), 4.38 (s, 2 H), 4.01 (br s, 1 H), 3.51 (br s, 2 H), 3.06 (br s, 2 H).

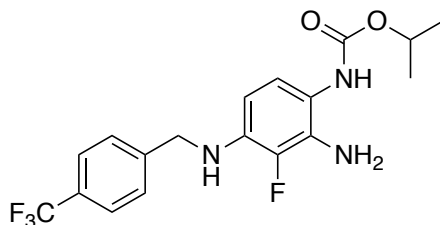

**Isopropyl**

**(2-amino-3-fluoro-4-((4-**

**(trifluoromethyl)benzyl)amino)phenyl)carbamate (RL-32).** A solution of 3-fluoro- $N^4$ -(4-(trifluoromethyl)benzyl)benzene-1,2,4-triamine (0.15 g, 0.50 mmol) in  $\text{CH}_2\text{Cl}_2$  (10 mL) under argon was charged at 0  $^\circ\text{C}$  with diisopropylethylamine (0.10 mL, 0.55 mmol) and

dropwise with a solution of isopropyl chloroformate (1 M in toluene, 0.045 mL, 0.45 mmol). The reaction mixture was stirred for 4 h at 0 °C, and quenched with water. The aqueous layer was extracted with CH<sub>2</sub>Cl<sub>2</sub> (3 x 10 mL), and the combined organic extracts were dried (Na<sub>2</sub>SO<sub>4</sub>), concentrated under reduced pressure, and purified by chromatography on SiO<sub>2</sub> (hexanes/EtOAc, 2:1 to 1:1, containing Et<sub>3</sub>N (1%)) to afford **RL-32** as a light yellow solid (0.14 g, 73%). Recrystallization from CH<sub>2</sub>Cl<sub>2</sub>/hexanes afforded **RL-32** (0.102 g) as a colorless solid: Mp 199.6-200.0 °C; IR (ATR) 3415, 3357, 3305, 1679, 1525, 1519, 1478, 1325, 1260, 1158, 1124, 1107, 1068 cm<sup>-1</sup>; <sup>1</sup>H NMR (400 MHz, CDCl<sub>3</sub>) δ 7.59 (d, 2 H, *J* = 8.0 Hz), 7.46 (d, 2 H, *J* = 8.4 Hz), 6.73 (d, 1 H, *J* = 8.8 Hz), 6.08 (br s, 1 H), 5.99 (t, 1 H, *J* = 8.8 Hz), 4.97 (sept, 1 H, *J* = 6.0 Hz), 4.43 (d, 2 H, *J* = 5.6 Hz), 4.32 (br s, 1 H), 3.88 (br s, 2 H), 1.28 (d, 6 H, *J* = 6.0 Hz); <sup>13</sup>C NMR (100 MHz, CDCl<sub>3</sub>) δ 155.0, 143.6, 141.4 (d, *J* = 223.0 Hz), 134.9 (d, *J* = 10.0 Hz), 130.8, 129.7 (q, *J* = 32.0 Hz), 127.4, 125.7 (q, *J* = 4.0 Hz), 124.3 (q, *J* = 270.0 Hz), 121.7, 115.6, 101.9, 69.2, 47.5, 22.2; <sup>19</sup>F NMR (376 MHz, CDCl<sub>3</sub>) δ -62.4 (s, 3F), -156.1 (s, 1F); HRMS (HESI) *m/z* calcd for C<sub>18</sub>H<sub>20</sub>N<sub>3</sub>O<sub>2</sub>F<sub>4</sub> [M+H]<sup>+</sup> 386.1484, found 386.1484.

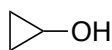

**Cyclopropanol.**<sup>1</sup> A suspension of cyclopropyl boronic acid (1.00 g, 11.6 mol) in water (8 mL) was treated at 0 °C with NaOH (1.02 g, 25.6 mmol), and stirred for 5 min until a homogeneous solution formed. A solution of 30% aqueous H<sub>2</sub>O<sub>2</sub> (6.54 mL, 64.0 mmol) was added dropwise, and stirring was continued for 3 h at 0 °C. The reaction mixture was extracted with Et<sub>2</sub>O (3 x 5 mL), and the combined organic layers were dried (Na<sub>2</sub>SO<sub>4</sub>), filtered, and concentrated in vacuo at 0 °C to afford cyclopropanol (0.36 g, 53%) as a colorless oil: <sup>1</sup>H NMR (500 MHz, CDCl<sub>3</sub>) δ 3.52-3.48 (m, 1 H), 0.57-0.46 (m, 4 H). The compound was dissolved in dry CH<sub>2</sub>Cl<sub>2</sub> (10 mL) and stored refrigerated over 4 Å molecular sieves for 1 d before usage.

<sup>1</sup> Riggs, J. R.; Nagy, M.; Elsner, J.; Erdman, P.; Cashion, D.; Robinson, D.; Harris, R.; Huang, D.; Tehrani, L.; Deyanat-Yazdi, G.; Narla, R. K.; Peng, X.; Tran, T.; Barnes, L.; Miller, T.; Katz, J.; Tang, Y.; Chen, M.; Moghaddam, M. F.; Bahmanyar, S.; Pagarigan, B.; Delker, S.; LeBrun, L.; Chamberlain, P. P.; Calabrese, A.; Canan, S. S.; Leftheris, K.; Zhu, D.; Boylan, J. F. "The Discovery of a Dual Ttk Protein Kinase/Cdc2-Like Kinase (Clk2) Inhibitor for the Treatment of Triple Negative Breast Cancer Initiated from a Phenotypic Screen." *J. Med. Chem.* **2017**, *60*(21), 8989-9002.

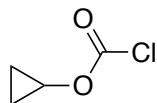

**Cyclopropyl carbonochloridate.**<sup>2</sup> A solution of cyclopropanol (0.060 g, 1.03 mmol) in CH<sub>2</sub>Cl<sub>2</sub> (2 mL) was cooled to 0 °C, treated with K<sub>2</sub>CO<sub>3</sub> (0.43 g, 3.10 mmol) followed by phosgene (20% wt in toluene, 0.54 mL, 1.03 mmol), and stirred vigorously overnight at 0 °C to room temperature. Unreacted phosgene was removed by purging the solution for 30 min with N<sub>2</sub> gas which was then passed through an aqueous KOH trap. The reaction mixture was filtered through anhydrous MgSO<sub>4</sub>, and concentrated at 0 °C to afford cyclopropyl chloroformate as a colorless oil (~0.3 mL) that was used directly as a toluene solution for the next step (cyclopropyl chloroformate/cyclopropanol = 1:0.19, theoretical concentration = 2.8 M). <sup>1</sup>H NMR (400 MHz, CDCl<sub>3</sub>) δ 4.41-3.36 (m, 1 H), 0.98-0.82 (m, 4 H); <sup>13</sup>C NMR (100 MHz, CDCl<sub>3</sub>) δ 151.3, 56.2, 5.49.

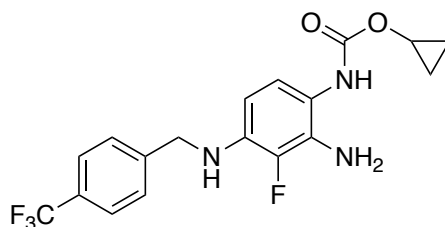

**Cyclopropyl (2-amino-3-fluoro-4-((4-(trifluoromethyl)benzyl)amino)phenyl)carbamate (RL-56).** A solution of 3-fluoro-*N*<sup>4</sup>-(4-(trifluoromethyl)benzyl)benzene-1,2,4-triamine (0.07 g, 0.23 mmol) in CH<sub>2</sub>Cl<sub>2</sub> (2.5 mL) was treated with diisopropylethylamine (0.045 mL, 0.26 mmol), cooled 0 °C and treated dropwise with cyclopropyl chloroformate (~ 2.8 M in toluene, 0.075 mL). The resulting mixture was stirred overnight at 0 °C to rt. After addition of water, the aqueous layer was extracted with CH<sub>2</sub>Cl<sub>2</sub> (3 x 5 mL). The combined organic extracts were dried (Na<sub>2</sub>SO<sub>4</sub>), concentrated under reduced pressure and purified by chromatography on SiO<sub>2</sub> (hexanes/EtOAc, 5:1 to 2:1) to afford **RL-56** (0.042 g, 47%) as a light yellow solid: Mp 175.1 - 175.6 °C; IR (ATR) 3314, 2937, 1696, 1523, 1327, 1258, 1163, 1117, 1103, 1066, 826, 764, 749 cm<sup>-1</sup>; <sup>1</sup>H NMR (400 MHz, CDCl<sub>3</sub>) δ 7.59 (d, 2 H, *J* = 8.4 Hz), 7.46 (d, 2 H, *J* = 8.0 Hz), 6.72 (d, 1 H, *J* = 7.6 Hz), 6.15 (br s, 1 H), 5.99 (t, 1 H, *J* = 8.8 Hz), 4.42 (d, 2 H, *J* = 5.6 Hz), 4.33 (brs,

<sup>2</sup> Grabowska, U.; Joensson, D.; Klasson, B.; Wiktelius, D.: Medivir UK Ltd. "Preparation of Cycloalkyl Pyrazole and Imidazole Compounds as Cysteine Protease Inhibitors for Therapy." WO 2012172473 A1 20121220.



1 H), 4.15-4.10 (m, 1 H), 3.85 (brs, 2 H), 0.72-0.70 (m, 4 H);  $^{13}\text{C}$  NMR (100 MHz,  $\text{CDCl}_3$ )  $\delta$  155.7, 143.5, 141.3 (d,  $J = 230.0$  Hz), 135.0 (d,  $J = 9.0$  Hz), 130.8, 129.7 (q,  $J = 32.0$  Hz), 127.4, 125.7 (q,  $J = 4.0$  Hz), 124.3 (q,  $J = 271.0$  Hz), 121.6, 115.2, 101.9, 49.9, 47.5, 5.2;  $^{19}\text{F}$  NMR (376 MHz,  $\text{CDCl}_3$ )  $\delta$  -62.4 (s, 3 F), -156.0 (s, 1 F); HRMS (HESI)  $m/z$  calcd for  $\text{C}_{18}\text{H}_{18}\text{N}_3\text{O}_2\text{F}_4$  [M+H] 384.1330, found 384.1329.

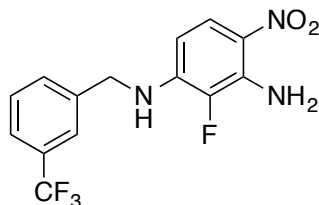

**2-Fluoro-4-nitro- $N^1$ -(3-(trifluoromethyl)benzyl)benzene-1,3-diamine (5b).** To a stirred solution of 2,3-difluoro-6-nitroaniline **4a** (0.200 g, 1.11 mmol) in dry DMSO (4.6 mL) were added 3-(trifluoromethyl)benzylamine **3b** (0.195 mL, 1.34 mmol) followed by  $\text{Et}_3\text{N}$  (0.135 g, 1.34 mmol) and  $\text{I}_2$  (cat. 2 mg). The reaction mixture was heated to 120 °C for 24 h, cooled to room temperature, diluted with water (25 mL) and extracted with EtOAc (3 x 15 mL). The combined organic layers were washed with brine, dried ( $\text{Na}_2\text{SO}_4$ ), filtered and concentrated under reduced pressure. The residue was purified by chromatography on  $\text{SiO}_2$  (EtOAc/hexanes, 1:10 to 1:4 to 1:3) to afford **5b** as a yellow solid (0.280 g, 76%): Mp 156.0-157.2 °C; IR (ATR) 3495, 3383, 1627, 1480, 1411, 1275, 1251, 1120, 1070, 798  $\text{cm}^{-1}$ ;  $^1\text{H}$  NMR (400 MHz,  $\text{CDCl}_3$ )  $\delta$  7.86 (dd, 1 H,  $J = 9.6, 1.6$  Hz), 7.59-7.57 (m, 2 H), 7.54-7.47 (m, 2 H), 6.15-6.00 (m, 3 H), 4.93 (brs, 1 H), 4.54 (d, 2 H,  $J = 6.0$  Hz);  $^{13}\text{C}$  NMR (100 MHz,  $\text{CDCl}_3$ )  $\delta$  140.9 (d,  $J = 9.5$  Hz), 138.9, 138.0 (d,  $J = 228.6$  Hz), 135.2 (d,  $J = 12.9$  Hz), 131.5 (q,  $J = 32.5$  Hz), 130.5, 129.6, 125.6 (d,  $J = 3.5$  Hz), 124.9 (q,  $J = 3.7$  Hz), 124.1 (q,  $J = 272.4$  Hz), 124.0 (q,  $J = 3.7$  Hz), 123.7 (d,  $J = 2.9$  Hz), 100.7 (d,  $J = 2.9$  Hz), 46.8;  $^{19}\text{F}$  NMR (471 MHz,  $\text{CDCl}_3$ )  $\delta$  -62.7 (s, 3 F), -160.6 (s, 1 F); HRMS (HESI)  $m/z$  calcd for  $\text{C}_{14}\text{H}_{12}\text{N}_3\text{O}_2\text{F}_4$  [M+H] $^+$  330.0860, found 330.0858.

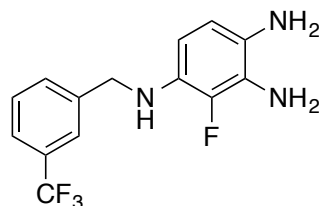

**3-Fluoro-*N*<sup>4</sup>-(3-(trifluoromethyl)benzyl)benzene-1,2,4-triamine.** To a stirred solution of **5b** (0.280 g, 0.85 mmol) in MeOH (2 mL) was added zinc powder (0.278 g, 4.25 mmol) followed by the dropwise addition of a solution of saturated aqueous ammonium chloride (0.80 mL). The reaction mixture was stirred vigorously at room temperature overnight, diluted with EtOAc (2 mL) and water (1 mL), and filtered through a pad of Celite. The Celite was washed with EtOAc and the solution was extracted with EtOAc (3 x 5 mL). The combined organic layers were dried (Na<sub>2</sub>SO<sub>4</sub>) and concentrated to afford crude 3-fluoro-*N*<sup>4</sup>-(3-(trifluoromethyl)benzyl)benzene-1,2,4-triamine (0.190 g, 75%) as a dark red solid that was used in the next step without further purification: <sup>1</sup>H NMR (400 MHz, CDCl<sub>3</sub>) δ 7.63 (s, 1 H), 7.56 (d, 1 H, *J* = 7.6 Hz), 7.52 (d, 1 H, *J* = 7.6 Hz), 7.44 (t, 1 H, *J* = 7.6 Hz), 6.37 (dd, 1 H, *J* = 8.4, 2.0 Hz), 5.99 (t, 1 H, *J* = 8.8 Hz), 4.36 (s, 2 H), 3.98 (brs, 1 H), 3.52 (brs, 2 H), 3.10 (brs, 2 H); <sup>19</sup>F NMR (471 MHz, CDCl<sub>3</sub>) δ -62.5 (s, 3 F), -155.8 (s, 1 F).

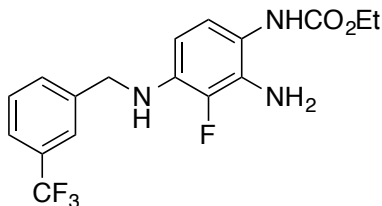

**Ethyl (2-amino-3-fluoro-4-((3-(trifluoromethyl)benzyl)amino)phenyl)carbamate (RL-73).** A solution of 3-fluoro-*N*<sup>4</sup>-(3-(trifluoromethyl)benzyl)benzene-1,2,4-triamine (0.060 g, 0.20 mmol) under argon in CH<sub>2</sub>Cl<sub>2</sub> (1 mL) was charged at 0 °C with diisopropylethylamine (0.043 mL, 0.25 mmol) and dropwise ethyl chloroformate (0.02 mL, 0.20 mmol) at 0 °C. The reaction mixture was stirred for 1 h at 0 °C and for 3 h at room temperature, then quenched by addition of water. The aqueous layer was extracted with CH<sub>2</sub>Cl<sub>2</sub> (3 x 5 mL). The combined organic extracts were dried (Na<sub>2</sub>SO<sub>4</sub>), concentrated under reduced pressure, and purified by chromatography on SiO<sub>2</sub> (EtOAc/hexanes, 1:4 to 2:3) to afford **RL-73** (0.045 g, 60%) as a dark red solid. Recrystallization from CH<sub>2</sub>Cl<sub>2</sub>/hexanes gave colorless crystals: Mp 129.3-129.7 °C; IR (ATR) 3406, 3290, 1676, 1452, 1329, 1246, 1160, 1113, 1072, 915, 701 cm<sup>-1</sup>; <sup>1</sup>H NMR (400 MHz, CDCl<sub>3</sub>) δ 7.61 (s, 1 H), 7.57-7.51 (m, 2 H), 7.45 (t, 1 H, *J* = 7.6 Hz), 6.74 (dd, 1 H, *J* = 8.4, 1.2 Hz), 6.11 (br s, 1 H), 6.02 (t, 1 H, *J* = 8.8 Hz), 4.41 (d, 2 H, *J* = 5.2 Hz), 4.30 (brs, 1 H), 4.20 (q, 2 H, *J* = 7.2 Hz), 3.86 (brs, 2 H), 1.28 (t, 3 H, *J* = 7.2

Hz);  $^{13}\text{C}$  NMR (100 MHz, acetone- $d_6$ )  $\delta$  156.0, 143.1, 141.8 (d,  $J$  = 227.9 Hz), 135.5 (d,  $J$  = 9.7 Hz), 132.4, 131.8, 130.9 (q,  $J$  = 31.8 Hz), 130.1, 125.5 (q,  $J$  = 271.5 Hz), 124.5 (q,  $J$  = 3.9 Hz), 124.3 (q,  $J$  = 3.9 Hz), 122.3, 116.5, 101.3, 61.2, 47.4, 15.0;  $^{19}\text{F}$  NMR (376 MHz,  $\text{CDCl}_3$ )  $\delta$  -62.6 (s, 3 F), -155.5 (s, 1 F); HRMS (HESI)  $m/z$  calcd for  $\text{C}_{17}\text{H}_{18}\text{N}_3\text{O}_2\text{F}_4$   $[\text{M}+\text{H}]^+$  372.1330, found 372.1328.

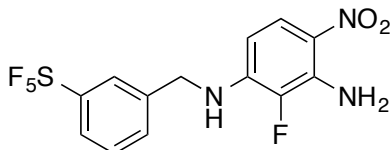

**2-Fluoro-4-nitro- $N^1$ -(3-(pentafluoro- $\lambda^6$ -sulfanyl)benzyl)benzene-1,3-diamine (5c).** A suspension of 2,3-difluoro-6-nitroaniline **4a** (0.500 g, 2.78 mmol) in dry DMSO (5 mL) was treated with 3-(pentafluorosulfanyl)benzylamine **3c** (0.714 g, 3.06 mmol) followed by  $\text{Et}_3\text{N}$  (0.43 mL, 3.06 mmol) and  $\text{I}_2$  (cat. 5 mg). The reaction mixture was heated to 120 °C for 24 h, cooled to room temperature, diluted with water (30 mL) and extracted with EtOAc (3 x 30 mL). The combined organic layers were washed with brine, dried ( $\text{Na}_2\text{SO}_4$ ), filtered, and concentrated under reduced pressure. The resulting residue was treated with a small amount of  $\text{Et}_2\text{O}$  (2 mL), sonicated, and filtered, and the filter cake was again washed with  $\text{Et}_2\text{O}$  (3 x 3 mL) to afford **5c** (0.51 g) as a yellow solid. The filtrate was concentrated in vacuo and the residue was purified by chromatography on  $\text{SiO}_2$  (acetone/hexanes, 1:10 to 1:4 to 1:3) to afford additional **5c** (0.17 g). The fractions were combined to afford **5c** (0.68 g, 63%) as a yellow solid: Mp 169.5-170.0 °C; IR (ATR) 3495, 3385, 1631, 1549, 1482, 1413, 1286, 1273, 1240, 1206, 1176, 1141, 1105, 1087, 891, 859, 820, 796, 775, 751, 688  $\text{cm}^{-1}$ ;  $^1\text{H}$  NMR (400 MHz,  $\text{CDCl}_3$ )  $\delta$  7.85 (dd, 1 H,  $J$  = 9.6, 1.6 Hz), 7.72-7.68 (m, 2 H), 7.50-7.46 (m, 2 H), 6.07 (brs, 2 H), 6.02 (dd, 1 H,  $J$  = 9.6, 8.0 Hz), 5.00 (brs, 1 H), 4.54 (d, 2 H,  $J$  = 1.5 Hz);  $^{13}\text{C}$  NMR (100 MHz, acetone- $d_6$ )  $\delta$  154.8 (app t,  $J$  = 16.0 Hz), 142.2 (d,  $J$  = 9.0 Hz), 142.2, 138.5 (d,  $J$  = 228.0 Hz), 136.7 (d,  $J$  = 13.0 Hz), 131.6, 130.4, 125.7-125.4 (m), 125.5 (d,  $J$  = 5.0 Hz), 125.3 (app t,  $J$  = 5.0 Hz), 123.8 (d,  $J$  = 2.0 Hz), 101.6 (d,  $J$  = 3.0 Hz), 46.3;  $^{19}\text{F}$  NMR (376 MHz,  $\text{CDCl}_3$ )  $\delta$  84.0 (quint, 1 F,  $J$  = 150.4 Hz), 62.7 (d, 4 F,  $J$  = 150.4 Hz), -160.4 (s, 1 F); HRMS (HESI)  $m/z$  calcd for  $\text{C}_{13}\text{H}_{12}\text{N}_3\text{O}_2\text{F}_2\text{S}$   $[\text{M}+\text{H}]^+$  388.0549, found 388.0549.

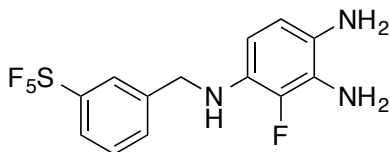

**3-Fluoro-*N*<sup>4</sup>-(3-(pentafluoro- $\lambda^6$ -sulfanyl)benzyl)benzene-1,2,4-triamine.** A solution of **5c** (0.500 g, 1.29 mmol) in MeOH (4 mL) was treated with zinc powder (0.422 g, 6.45 mmol) followed by dropwise addition of an aqueous solution of saturated ammonium chloride (1.22 mL). The reaction mixture was stirred vigorously at room temperature overnight, and filtered through Celite. The Celite was washed (EtOAc), and the filtrate was extracted with EtOAc (3 x 5 mL). The combined organic layers were dried (Na<sub>2</sub>SO<sub>4</sub>), and concentrated under reduced pressure to afford 3-fluoro-*N*<sup>4</sup>-(3-(pentafluoro- $\lambda^6$ -sulfanyl)benzyl)benzene-1,2,4-triamine (0.390 g, 85%) as a red solid that was used in the next step without further purification: <sup>1</sup>H NMR (400 MHz, CDCl<sub>3</sub>)  $\delta$  7.74 (s, 1 H), 7.64 (d, 1 H, *J* = 8.4 Hz), 7.51 (d, 1 H, *J* = 7.6 Hz), 7.41 (t, 1 H, *J* = 8.0 Hz), 6.39 (d, 1 H, *J* = 7.6 Hz), 5.98 (t, 1 H, *J* = 8.4 Hz), 4.35 (s, 2 H), 3.32 (br, 5 H).

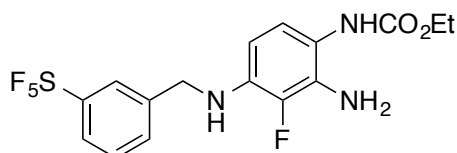

**Ethyl (2-amino-3-fluoro-4-((3-(pentafluoro- $\lambda^6$ -sulfanyl)benzyl)amino)phenyl)carbamate (RL-02).** A solution of 3-fluoro-*N*<sup>4</sup>-(3-(pentafluoro- $\lambda^6$ -sulfanyl)benzyl)benzene-1,2,4-triamine (0.20 g, 0.56 mmol) in CH<sub>2</sub>Cl<sub>2</sub> (3 mL) was treated under argon at 0 °C with diisopropylethylamine (0.12 mL, 0.7 mmol), followed by the dropwise addition of ethyl chloroformate (0.055 mL, 0.56 mmol) at 0 °C. The reaction mixture was stirred for 1 h at 0 °C, then for 3 h at room temperature, quenched with water and extracted with CH<sub>2</sub>Cl<sub>2</sub> (3 x 5 mL). The combined organic extracts were dried (Na<sub>2</sub>SO<sub>4</sub>), concentrated under reduced pressure, and purified by chromatography on SiO<sub>2</sub> (EtOAc/hexanes, 1:3 to 2:3) to afford yellow solid that was recrystallized from CH<sub>2</sub>Cl<sub>2</sub>/hexanes to afford **RL-02** (0.123 g, 44%) as a colorless solid: Mp 141.3-142.1 °C; IR (ATR) 3420, 3375, 2986, 1689, 1637, 1525, 1484, 1288, 1254, 1241, 829, 816, 787, 689 cm<sup>-1</sup>; <sup>1</sup>H NMR (400 MHz, CDCl<sub>3</sub>)  $\delta$  7.74 (s, 1 H), 7.65 (d, 1 H, *J* = 8.0 Hz), 7.50 (d, 1 H, *J* = 7.6 Hz),

7.42 (t, 1 H,  $J = 8.0$  Hz), 6.74 (d, 1 H,  $J = 7.6$  Hz), 6.24 (brs, 1 H), 6.00 (t, 1 H,  $J = 8.8$  Hz), 4.40 (s, 2 H), 4.19 (q, 2 H,  $J = 7.2$  Hz), 3.98 (brs, 3 H), 1.28 (t, 3 H,  $J = 7.2$  Hz);  $^{13}\text{C}$  NMR (100 MHz,  $\text{CDCl}_3$ )  $\delta$  155.5, 154.4 (quint,  $J = 17.0$  Hz), 141.3 (d,  $J = 232.0$  Hz), 140.7, 134.7 (d,  $J = 9.0$  Hz), 130.9, 130.3, 129.2, 125.0 (app t,  $J = 5.0$  Hz), 124.8 (quint,  $J = 5.0$  Hz), 121.7, 115.6, 101.9, 61.7, 47.6, 14.6;  $^{19}\text{F}$  NMR (565 MHz,  $\text{CDCl}_3$ )  $\delta$  84.5 (quint, 1 F,  $J = 146.9$  Hz), 62.8 (d, 4 F,  $J = 146.9$  Hz), -155.8 (s, 1 F); HRMS (HESI)  $m/z$  calcd for  $\text{C}_{16}\text{H}_{18}\text{N}_3\text{O}_2\text{F}_6\text{S}$   $[\text{M}+\text{H}]^+$  430.1018, found 430.1015.

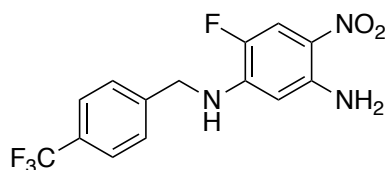

**6-Fluoro-4-nitro- $N^1$ -(4-(trifluoromethyl)benzyl)benzene-1,3-diamine (5d).** A 30-mL microwave vial equipped with a magnetic stir bar was charged with 4,5-difluoro-2-nitroaniline **4b** (0.530 g, 2.98 mmol) and 4-(trifluoromethyl)benzylamine **3a** (0.575 g, 3.28 mmol). The vial was evacuated and filled with  $\text{N}_2$  (3x). Dry DMSO (3 mL) was added followed by  $\text{Et}_3\text{N}$  (0.42 mL, 2.98 mmol) and  $\text{I}_2$  (0.023 g, 0.089 mmol). The vial was sealed and the reaction mixture was heated to 120 °C for 30 h, cooled to room temperature, diluted with water (30 mL), and extracted with EtOAc (3 x 15 mL). The combined organic layers were washed with brine (2 x 5 mL), dried ( $\text{Na}_2\text{SO}_4$ ), filtered and concentrated under reduced pressure. The residue was purified by chromatography on  $\text{SiO}_2$  (acetone/hexanes, 1:4 to 3:7, containing  $\text{Et}_3\text{N}$  (1%)) to afford **5d** (0.81 g, 82 %) as a yellow solid: Mp 150-151 °C; IR (ATR) 3446, 3323, 1641, 1549, 1397, 1325, 1283, 1251, 1105, 867  $\text{cm}^{-1}$ ;  $^1\text{H}$  NMR (400 MHz,  $\text{CDCl}_3$ )  $\delta$  7.79 (d, 1 H,  $J = 12.4$  Hz), 7.64 (d, 2 H,  $J = 8.0$  Hz), 7.44 (d, 2 H,  $J = 8.0$  Hz), 6.14 (brs, 2 H), 5.69 (d, 1 H,  $J = 7.6$  Hz), 5.12 (brs, 1 H), 4.50 (d, 2 H,  $J = 6.0$  Hz);  $^{13}\text{C}$  NMR (100 MHz,  $\text{CDCl}_3$ )  $\delta$  144.9, 143.8 (d,  $J = 14.0$  Hz), 143.5 (d,  $J = 235.0$  Hz), 141.0, 130.4 (q,  $J = 32.0$  Hz), 127.4, 126.1 (q,  $J = 4.0$  Hz), 124.1 (q,  $J = 270.0$  Hz), 121.6 (d,  $J = 9.0$  Hz), 111.1 (d,  $J = 23.0$  Hz), 96.1, 46.7;  $^{19}\text{F}$  NMR (376 MHz,  $\text{CDCl}_3$ )  $\delta$  -62.6 (s, 3F), -146.8 (s, 1F); HRMS (HESI)  $m/z$  calcd for  $\text{C}_{14}\text{H}_{12}\text{N}_3\text{O}_2\text{F}_4$   $[\text{M}+\text{H}]^+$  330.0860, found 330.0856.

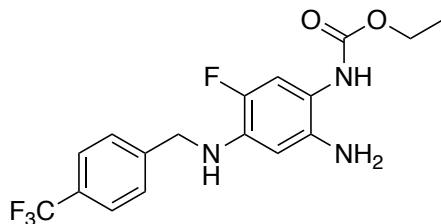

**Ethyl (2-amino-5-fluoro-4-((4-(trifluoromethyl)benzyl)amino)phenyl)carbamate (RL-72).** A solution of **5d** (0.410 g, 1.25 mmol) in MeOH (4 mL) was charged with zinc powder (0.407 g, 6.23 mmol) followed by dropwise addition of saturated aqueous ammonium chloride solution (1.25 mL). The reaction mixture was stirred vigorously at room temperature for 1 h, filtered through Celite, and the filter cake was washed with EtOAc. The filtrate was treated with saturated aqueous Na<sub>2</sub>CO<sub>3</sub> solution, and the aqueous layer was extracted with EtOAc (3 x 5 mL). The combined organic layers were washed with brine, dried (Na<sub>2</sub>SO<sub>4</sub>), and concentrated in vacuo. The resulting solid was dissolved in CH<sub>2</sub>Cl<sub>2</sub> (20 mL), cooled to 0 °C, treated with diisopropylethylamine (0.33 mL, 1.87 mmol) and ethyl chloroformate (0.11 mL, 1.12 mmol). The reaction mixture was stirred for 1 h at 0 °C and then for 3 h at room temperature before saturated aqueous Na<sub>2</sub>CO<sub>3</sub> was added. The aqueous layer was extracted with CH<sub>2</sub>Cl<sub>2</sub> (3 x 10 mL). The combined organic extracts were dried (Na<sub>2</sub>SO<sub>4</sub>), and concentrated under reduced pressure. The residue was purified by chromatography on SiO<sub>2</sub> (EtOAc/hexanes, 2:3, containing Et<sub>3</sub>N (1%)) to afford crude product that was recrystallized (CH<sub>2</sub>Cl<sub>2</sub>/hexanes) to give **RL-72** (0.112 g, 24 %) as a colorless solid: Mp 174.0-174.4 °C; IR (ATR) 3341, 2971, 1738, 1677, 1540, 1324, 1249, 1123, 1067, 704 cm<sup>-1</sup>; <sup>1</sup>H NMR (400 MHz, CDCl<sub>3</sub>) δ 7.59 (d, 2 H, *J* = 8.0 Hz), 7.45 (d, 2 H, *J* = 8.0 Hz), 6.93 (d, 1 H, *J* = 10.8 Hz), 6.13 (br s, 1 H), 5.93 (d, 1 H, *J* = 8.4 Hz), 4.39 (s, 2 H), 4.19 (q, 2 H, *J* = 7.2 Hz), 3.55 (brs, 2 H), 1.28 (t, 3 H, *J* = 7.2 Hz); <sup>13</sup>C NMR (100 MHz, CDCl<sub>3</sub>) δ 155.3, 145.0 (d, *J* = 231.0 Hz), 143.3, 138.0, 135.3, 129.7 (q, *J* = 32.0 Hz), 127.4, 125.8 (q, *J* = 4.0 Hz), 124.3 (q, *J* = 270.0 Hz), 112.8, 100.9, 61.6, 47.5, 14.7; <sup>19</sup>F NMR (376 MHz, CDCl<sub>3</sub>) δ -62.4 (s, 3 F), -146.3 (s, 1 F); HRMS (HESI) *m/z* calcd for C<sub>17</sub>H<sub>18</sub>N<sub>3</sub>O<sub>2</sub>F<sub>4</sub> [M+H]<sup>+</sup> 372.1330, found 372.1326.

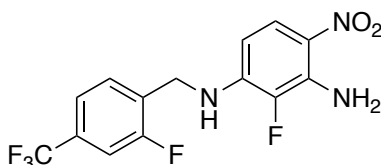

**2-Fluoro-*N*<sup>1</sup>-(2-fluoro-4-(trifluoromethyl)benzyl)-4-nitrobenzene-1,3-diamine (5e).**

A solution of 2-fluoro-4-(trifluoromethyl)benzylamine **3d** (0.10 g, 0.50 mmol) and 2,3-difluoro-6-nitroaniline **4a** (0.095 g, 0.53 mmol) in dry DMSO (1.0 mL) was treated under argon with Et<sub>3</sub>N (0.077 mL, 0.55 mmol) and I<sub>2</sub> (5 mg, 0.02 mmol). The reaction mixture was heated to 120 °C for 30 h, cooled to room temperature, quenched with water (10 mL) and extracted with CH<sub>2</sub>Cl<sub>2</sub> (4 x 10 mL). The combined organic layers were washed with brine (2 x 10 mL), dried (Na<sub>2</sub>SO<sub>4</sub>), filtered and concentrated under reduced pressure. The residue was purified by chromatography on SiO<sub>2</sub> (acetone/hexanes, 1:8 to 1:5 to 1:4, containing Et<sub>3</sub>N (0.2%)) to afford **5e** (0.142 g, 81%) as a yellow solid: Mp 153.4-153.6 °C; IR (ATR) 3487, 3379, 1629, 1547, 1478, 1420, 1281, 1238, 1176, 1161, 1115, 1090, 908, 755, 742 cm<sup>-1</sup>; <sup>1</sup>H NMR (400 MHz, acetone-d<sub>6</sub>) δ 7.78 (d, 1 H, *J* = 9.6 Hz), 7.66 (t, 1 H, *J* = 8.0 Hz), 7.54-7.51 (m, 2 H), 6.71 (brs, 2 H), 6.59 (br s, 1 H), 6.24-6.19 (m, 1 H), 4.74 (d, 2 H, *J* = 6.4 Hz); <sup>13</sup>C NMR (100 MHz, acetone-d<sub>6</sub>) δ 161.2 (d, *J* = 247.4 Hz), 142.1 (d, *J* = 9.5 Hz), 138.6 (d, *J* = 228.8 Hz), 136.7 (d, *J* = 13.3 Hz), 131.8 (d, *J* = 14.6 Hz), 131.5 (qd, *J* = 25.1, 8.3 Hz), 130.9 (d, *J* = 4.6 Hz), 125.6 (d, *J* = 3.7 Hz), 124.5 (qd, *J* = 271.5, 2.8 Hz), 123.9 (d, *J* = 2.8 Hz), 122.2 (quint, *J* = 3.8 Hz), 113.4 (dq, *J* = 25.1, 3.9 Hz), 101.3 (d, *J* = 3.12 Hz), 40.6 (d, *J* = 4.6 Hz); <sup>19</sup>F NMR (376 MHz, acetone-d<sub>6</sub>) δ -63.1 (s, 3 F), -117.3 (s, 1 F), -160.5 (s, 1 F); HRMS (HESI) *m/z* calcd for C<sub>14</sub>H<sub>11</sub>N<sub>3</sub>O<sub>2</sub>F<sub>5</sub> [M+H]<sup>+</sup> 348.0766, found 348.0764.

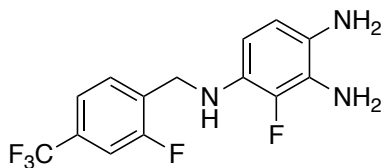

**3-Fluoro-*N*<sup>4</sup>-(2-fluoro-4-(trifluoromethyl)benzyl)benzene-1,2,4-triamine.** A solution of **5e** (0.14 g, 0.40 mmol) in MeOH (2 mL) was treated with zinc powder (0.26 g, 4.03 mmol) followed dropwise by saturated aqueous ammonium chloride (0.76 mL). The reaction mixture was stirred vigorously at room temperature for 5 h, and filtered through Celite. The filter cake was washed (CH<sub>2</sub>Cl<sub>2</sub>), and the filtrate was dried (Na<sub>2</sub>SO<sub>4</sub>) and concentrated in vacuo to afford crude 3-fluoro-*N*<sup>4</sup>-(2-fluoro-4-(trifluoromethyl)benzyl)benzene-1,2,4-triamine (0.10 g, 78%) as a red solid that was used in the next step without further purification: HRMS (HESI) *m/z* calcd for C<sub>14</sub>H<sub>13</sub>N<sub>3</sub>F<sub>5</sub> [M+H]<sup>+</sup> 318.1024, found 318.1023.

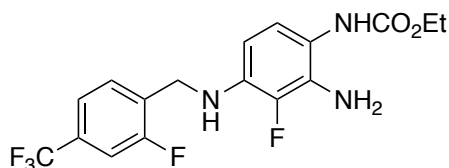

**Ethyl** **(2-amino-3-fluoro-4-((2-fluoro-4-(trifluoromethyl)benzyl)amino)phenyl)carbamate (RL-18)**. A solution of 3-fluoro-*N*<sup>4</sup>-(2-fluoro-4-(trifluoromethyl)benzyl)benzene-1,2,4-triamine (0.090 g, 0.28 mmol) in CH<sub>2</sub>Cl<sub>2</sub> (6 mL) under argon was treated at 0 °C with diisopropylethylamine (0.06 mL, 0.35 mmol) and dropwise with ethyl chloroformate (0.028 mL, 0.28 mmol). The reaction mixture was stirred for 4 h at 0 °C and quenched with water. The aqueous layer was extracted with CH<sub>2</sub>Cl<sub>2</sub> (3 x 5 mL), and the combined extracts were dried (Na<sub>2</sub>SO<sub>4</sub>), concentrated in vacuo and purified by chromatography on SiO<sub>2</sub> (hexanes/EtOAc, 5:1 to 4:1 to 3:1) to afford **RL-18** (0.045 g, 41%) as a red solid that was recrystallized (CH<sub>2</sub>Cl<sub>2</sub>/hexanes) to afford a colorless solid (0.030 g): Mp 170.1-170.7 °C; IR (ATR) 3407, 3331, 3297, 1681, 1646, 1521, 1489, 1428, 1329, 1254, 1217, 1163, 1120, 1081, 1064, 911, 874, 783, 744, 710 cm<sup>-1</sup>; <sup>1</sup>H NMR (500 MHz, CDCl<sub>3</sub>) δ 7.49 (t, 1 H, *J* = 8.0 Hz), 7.36 (d, 1 H, *J* = 8.0 Hz), 7.32 (d, 1 H, *J* = 10.0 Hz), 6.74 (d, 1 H, *J* = 8.5 Hz), 6.13 (brs, 1 H), 6.00 (app t, 1 H, *J* = 8.5 Hz), 4.48 (d, 2 H, *J* = 6.5 Hz), 4.32 (brs, 1 H), 4.19 (q, 2 H, *J* = 7.0 Hz), 3.87 (brs, 2 H), 1.29 (t, 3 H, *J* = 7.0 Hz); <sup>13</sup>C NMR (125 MHz, CDCl<sub>3</sub>) δ 160.4 (d, *J* = 248.2 Hz), 155.5, 141.4 (d, *J* = 232.4 Hz), 134.6 (d, *J* = 9.9 Hz), 131.5 (qd, *J* = 33.4, 8.0 Hz), 131.0, 130.7 (d, *J* = 14.5 Hz), 129.7 (d, *J* = 4.6 Hz), 123.4 (qd, *J* = 272.3, 2.9 Hz), 121.9, 121.3 (quint, *J* = 3.8 Hz), 115.7, 112.9 (dq, *J* = 24.8, 3.9 Hz), 101.8, 61.7, 41.4 (d, *J* = 4.3 Hz), 14.7; <sup>19</sup>F NMR (471 MHz, CDCl<sub>3</sub>) δ -62.6 (s, 3 F), -116.7 (s, 1 F), -156.0 (s, 1 F); HRMS (HESI) *m/z* calcd for C<sub>17</sub>H<sub>17</sub>N<sub>3</sub>O<sub>2</sub>F<sub>5</sub> [M+H]<sup>+</sup> 390.1235, found 390.1237.

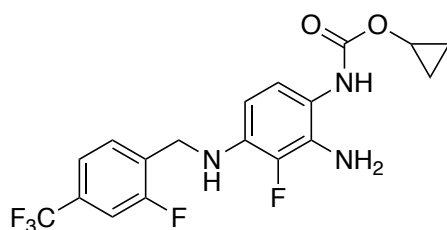

**Cyclopropyl** **(2-amino-3-fluoro-4-((2-fluoro-4-(trifluoromethyl)benzyl)amino)phenyl)carbamate (RL-35)**. A suspension of **5e** (0.347



g, 1.00 mmol) and zinc powder (0.327 g, 5.00 mmol) in MeOH (10 mL) was treated dropwise with aqueous 5 M ammonium chloride solution (1.00 mL) and stirred vigorously at room temperature for 1 h. The reaction mixture was filtered through Celite, and the filtrate was concentrated, diluted with EtOAc and saturated aqueous NaHCO<sub>3</sub>, and the aqueous layer was extracted with EtOAc (3 x 10 mL). The combined organic extracts were dried (Na<sub>2</sub>SO<sub>4</sub>), filtered, and concentrated in vacuo. A solution of the dark red residue in dry CH<sub>2</sub>Cl<sub>2</sub> (20 mL) was treated with diisopropylethylamine (0.21 mL, 1.20 mmol) and cyclopropyl chloroformate (0.50 mL, 1.00 mmol). The resulting mixture was stirred vigorously at room temperature for 4 h, quenched with saturated aqueous NaHCO<sub>3</sub> solution, and extracted with CH<sub>2</sub>Cl<sub>2</sub> (3 x 10 mL). The combined organic extracts were dried (Na<sub>2</sub>SO<sub>4</sub>), concentrated in vacuo, and purified by chromatography on SiO<sub>2</sub> (EtOAc/hexanes, 3:7 to 1:1, containing Et<sub>3</sub>N (1%)) to afford a light yellow solid that was recrystallized (CH<sub>2</sub>Cl<sub>2</sub>/hexanes) to afford **5e** (0.221 g, 55 %) as a colorless solid: Mp 177-178 °C; IR (ATR) 3306, 1689, 1338, 1123 cm<sup>-1</sup>; <sup>1</sup>H NMR (400 MHz, CDCl<sub>3</sub>) δ 7.48 (t, 1 H, *J* = 7.6 Hz), 7.38-7.31 (m, 2 H), 6.73 (d, 1 H, *J* = 7.6 Hz), 6.14 (br s, 1 H), 6.00 (t, 1 H, *J* = 8.8 Hz), 4.47 (d, 2 H, *J* = 5.6 Hz), 4.33 (brs, 1 H), 4.16-4.10 (m, 1 H), 3.86 (brs, 2 H), 0.80-0.60 (m, 4 H); <sup>13</sup>C NMR (151 MHz, CDCl<sub>3</sub>) δ 160.4 (d, *J* = 248.5 Hz), 155.7, 141.4 (d, *J* = 230.8 Hz), 134.6, 131.4 (qd, *J* = 33.5, 8.0 Hz), 130.8, 130.6 (d, *J* = 14.3 Hz), 129.7 (d, *J* = 4.9 Hz), 123.4 (qd, *J* = 272.1, 2.0 Hz), 121.6, 121.5-121.2 (m), 115.5, 112.9 (dm, *J* = 24.8 Hz), 101.8, 49.9, 41.3 (d, *J* = 4.2 Hz), 5.3; <sup>19</sup>F NMR (376 MHz, CDCl<sub>3</sub>) δ -62.6 (s, 3 F), -116.7 (s, 1 F), -155.9 (s, 1 F); HRMS (HESI) *m/z* calcd for C<sub>18</sub>H<sub>17</sub>N<sub>3</sub>O<sub>2</sub>F<sub>5</sub> [M+H]<sup>+</sup> 402.1235, found 402.1232.

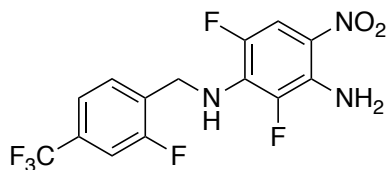

**2,6-Difluoro-*N*<sup>1</sup>-(2-fluoro-4-(trifluoromethyl)benzyl)-4-nitrobenzene-1,3-diamine**

**(5f).** A vial containing 2-fluoro-4-(trifluoromethyl)benzylamine **3d** (0.20 g, 1.00 mmol) and 2,3,4-trifluoro-6-nitroaniline **4c** (0.19 g, 1.00 mmol) was evacuated and backfilled with N<sub>2</sub> (3 x). Dry DMSO (2.0 mL) was added, followed by Et<sub>3</sub>N (0.15 mL, 1.06 mmol) and I<sub>2</sub> (10 mg, 0.04 mmol). The vial was sealed and the reaction mixture was heated to 120 °C for 30 h, cooled to

room temperature, diluted with water (20 mL) and extracted with CH<sub>2</sub>Cl<sub>2</sub> (3 x 10 mL). The combined organic layers were washed with brine (2 x 10 mL), dried (Na<sub>2</sub>SO<sub>4</sub>), filtered and concentrated in vacuo. The residue was purified by chromatography on SiO<sub>2</sub> (EtOAc/hexanes, 1:4, containing Et<sub>3</sub>N (0.2%)) to afford a yellow solid that was recrystallized from CH<sub>2</sub>Cl<sub>2</sub>/hexanes to afford **5f** (0.26 g, 71 %) as a bright yellow solid: Mp 108-110 °C; IR (ATR) 3500, 3379, 3088, 1644, 1528, 1509, 1431, 1328, 1256, 1126, 909 cm<sup>-1</sup>; <sup>1</sup>H NMR (400 MHz, acetone-d<sub>6</sub>) δ 7.72 (t, 1 H, *J* = 8.0 Hz), 7.65-7.47 (m, 3 H), 6.76 (brs, 2 H), 6.48 (brs, 1 H), 4.87 (d, 2 H, *J* = 6.8 Hz); <sup>13</sup>C NMR (100 MHz, acetone-d<sub>6</sub>) δ 160.8 (d, *J* = 247.5 Hz), 143.4 (dd, *J* = 233.0, 9.0 Hz), 139.0 (dd, *J* = 230.0, 7.0 Hz), 136.0 (d, *J* = 14.0 Hz), 133.0 (dd, *J* = 16.00, 10.0 Hz), 132.8 (d, *J* = 13.0 Hz), 131.4 (qd, *J* = 33.0, 8.0 Hz), 130.6 (d, *J* = 5.0 Hz), 124.5 (qd, *J* = 270.0, 3.0 Hz), 122.2 (app quint, *J* = 4 Hz), 121.6 (dd, *J* = 10.0, 5.0 Hz), 113.4 (dq, *J* = 25.0, 4.0 Hz), 107.5 (dd, *J* = 25.0, 2.0 Hz), 42.6 (d, *J* = 4.0 Hz); <sup>19</sup>F NMR (376 MHz, acetone-d<sub>6</sub>) δ -63.1 (s, 3 F), -118.0 (s, 1 F), -144.7 (d, 1 F, *J* = 3.8 Hz), -155.5 (d, 1 F, *J* = 7.5 Hz); HRMS (HESI) *m/z* calcd for C<sub>14</sub>H<sub>10</sub>N<sub>3</sub>O<sub>2</sub>F<sub>6</sub> [M+H]<sup>+</sup> 366.0672, found 366.0669.

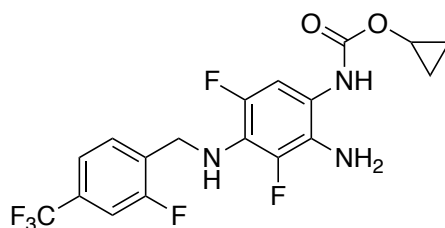

**Cyclopropyl (2-amino-3,5-difluoro-4-((2-fluoro-4-(trifluoromethyl)benzyl)amino)phenyl)carbamate (RL-36).** A solution of **5f** (0.365 g, 1.00 mmol) in MeOH (10 mL) was treated with zinc powder (0.327 g, 5.00 mmol) followed by a 5 M aqueous ammonium chloride solution (1.00 mL). The reaction mixture was stirred vigorously at room temperature for 2 h, and filtered through Celite. The filtrate was concentrated in vacuo, and the residue was diluted with EtOAc and saturated aqueous NaHCO<sub>3</sub>. The aqueous layer was extracted with EtOAc (3 x 10 mL), dried (Na<sub>2</sub>SO<sub>4</sub>), filtered, and concentrated in vacuo to yield a dark red residue that was dissolved in dry CH<sub>2</sub>Cl<sub>2</sub> (20 mL). After addition of diisopropylethylamine (0.21 mL, 1.20 mmol) and cyclopropyl chloroformate (0.50 mL, 1.00 mmol), the reaction mixture was stirred vigorously at room temperature for 4 h, and quenched with saturated aqueous NaHCO<sub>3</sub>. The aqueous layer was

extracted with CH<sub>2</sub>Cl<sub>2</sub> (3 x 10 mL), and the combined organic layers were dried (Na<sub>2</sub>SO<sub>4</sub>), concentrated in vacuo, and purified by chromatography on SiO<sub>2</sub> (EtOAc/hexanes, 3:7 to 1:1, containing Et<sub>3</sub>N (1%)) to afford a pink solid that was recrystallized (CH<sub>2</sub>Cl<sub>2</sub>/hexanes) twice to afford **RL-36** (0.204 g, 49%) as a light beige solid: Mp 119-120 °C; IR (ATR) 3309, 1702, 1519, 1429, 1329, 1239, 1164, 1124 cm<sup>-1</sup>; <sup>1</sup>H NMR (500 MHz, CDCl<sub>3</sub>) δ 7.46 (t, 1 H, *J* = 7.5 Hz), 7.35 (d, 1 H, *J* = 8.0 Hz), 7.29 (d, 1 H, *J* = 10.0 Hz), 6.90 (s, 1 H), 6.40 (brs, 1 H), 4.54 (d, 2 H, *J* = 7.0 Hz), 4.13-4.10 (m, 1 H), 3.97 (brs, 1 H), 3.50 (brs, 2 H), 0.71 (d, 4 H, *J* = 5.0 Hz); <sup>13</sup>C NMR (125 MHz, CDCl<sub>3</sub>) δ 160.6 (d, *J* = 248.5 Hz), 155.1, 146.5 (d, *J* = 232.6 Hz), 143.9 (d, *J* = 229.9 Hz), 131.5 (qd, *J* = 33.3, 8.0 Hz), 131.2 (d, *J* = 14.8 Hz), 130.3 (d, *J* = 4.8 Hz), 125.5, 123.4 (qd, *J* = 272.3, 2.7 Hz), 122.7, 121.2 (quint, *J* = 3.8 Hz), 117.0, 112.9 (dq, *J* = 24.9, 3.8 Hz), 107.2, 50.0, 44.3 (q, *J* = 3.8 Hz), 5.1; <sup>19</sup>F NMR (471 MHz, CDCl<sub>3</sub>) δ -62.7 (s, 3 F), -117.1 (s, 1 F), -139.2 (s, 1 F), -147.1 (s, 1 F); HRMS (HESI) *m/z* calcd for C<sub>18</sub>H<sub>16</sub>N<sub>3</sub>O<sub>2</sub>F<sub>6</sub> [M+H]<sup>+</sup> 420.1141, found 420.1140.

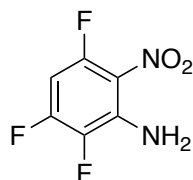

**2,3,5-Trifluoro-6-nitroaniline (4d).**<sup>3</sup> A sealable vial was flushed with N<sub>2</sub> and filled with 2,3,4,6-tetrafluoronitrobenzene (1.05 g, 5.22 mmol) and Et<sub>2</sub>O (20 mL). Aqueous 28% ammonium hydroxide solution (1.60 mL, 11.49 mmol) was added dropwise over 1 h. The reaction mixture was stirred for 1 h at room temperature, quenched with water, and the aqueous layer was extracted with Et<sub>2</sub>O (2 x 5 mL). The combined organic layers were dried (Na<sub>2</sub>SO<sub>4</sub>), filtered, concentrated in vacuo, and the residue was purified by chromatography on SiO<sub>2</sub> (EtOAc/hexanes, 1:19 to 1:9) to afford **4d** (0.884 g, 88%) as a bright yellow solid: Mp 63-65 °C; IR(ATR) 3499, 3389, 3099, 1647, 1594, 1539, 1473, 1354, 1285, 1239, 1108, 1092, 885 cm<sup>-1</sup>; <sup>1</sup>H NMR (500 MHz, CDCl<sub>3</sub>) δ 6.37 (ddd, 1 H, *J* = 11.4, 10.0, 6.5 Hz), 6.04 (brs, 2 H); <sup>13</sup>C NMR (125 MHz, CDCl<sub>3</sub>) δ 153.9 (ddd, *J* = 261.3, 14.1, 3.6 Hz), 152.2 (ddd, *J* = 256.6, 14.9,

<sup>3</sup> Burdon, J.; Fisher, D.; Parsons, I. W.; Tatlow, J. C. "Aromatic Polyfluoro Compounds Lvii. Nucleophilic Replacement Reactions of 1,2,3,5-Tetrafluoro-4-Nitrobenzene, 1,2,3,5-Tetrafluorodinitrobenzene and 1-Bromo-2,3,4,6-Tetrafluoro-5-Nitrobenzene." *J. Fluorine Chem.* **1981**, *18*, 507-514.

11.4 Hz), 137.0-136.7 (m), 135.0 (dd,  $J = 14.8, 4.8$  Hz), 121.9, 93.5 (dd,  $J = 27.4, 23.5$  Hz);  $^{19}\text{F}$  NMR (471 MHz,  $\text{CDCl}_3$ )  $\delta$ , -117.5 (dd, 1 F,  $J = 12.0, 8.9$  Hz), -125.7 (dd, 1 F,  $J = 20.8, 8.9$  Hz), -161.5 (dd, 1 F,  $J = 20.8, 12.2$  Hz); HRMS (HESI)  $m/z$  calcd for  $\text{C}_6\text{H}_4\text{N}_2\text{O}_2\text{F}_3$   $[\text{M}+\text{H}]^+$  193.0225, found 193.0222.

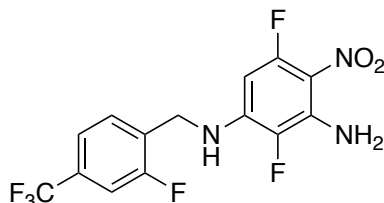

### 2,5-Difluoro- $N^1$ -(2-fluoro-4-(trifluoromethyl)benzyl)-4-nitrobenzene-1,3-diamine

**(5g).** An oven-dried sealable vial was charged with 2-fluoro-4-(trifluoromethyl)benzylamine **3d** (0.36 g, 1.87 mmol) and **4d** (0.36 g, 1.087 mmol). The vial was evacuated and backfilled with  $\text{N}_2$  (3 x). Dry DMSO (2.0 mL) was added, followed by  $\text{Et}_3\text{N}$  (0.32 mL, 2.25 mmol) and  $\text{I}_2$  (24 mg, 0.09 mmol). The vial was sealed and the reaction mixture was heated to 120 °C for 36 h, cooled to room temperature, diluted with water (20 mL), and extracted with  $\text{CH}_2\text{Cl}_2$  (3 x 10 mL). The combined organic layers were washed with brine (2 x 10 mL), dried ( $\text{Na}_2\text{SO}_4$ ), concentrated in vacuo, and purified by chromatography on  $\text{SiO}_2$  (EtOAc/hexanes, 1:4, containing  $\text{Et}_3\text{N}$  (0.2%)) to afford a yellow solid that was recrystallized ( $\text{CH}_2\text{Cl}_2$ /hexanes) to afford **5g** (0.38 g, 56 %) as a yellow solid: Mp 149-150 °C; IR (ATR) 3488, 3401, 1637, 1551, 1425, 1270, 1171, 1116, 881, 789  $\text{cm}^{-1}$ ;  $^1\text{H}$  NMR (600 MHz,  $\text{CDCl}_3$ )  $\delta$  7.46-7.41 (m, 2 H), 7.36 (d, 1 H,  $J = 10.2$  Hz), 5.92 (br s, 2 H), 5.85 (dd, 1 H,  $J = 13.8, 7.2$  Hz), 5.02 (brs, 1 H), 4.55 (d, 2 H,  $J = 6.6$  Hz);  $^{13}\text{C}$  NMR (151 MHz,  $\text{CDCl}_3$ )  $\delta$  160.4 (d,  $J = 247.5$  Hz), 156.1 (dd,  $J = 255.0, 1.5$  Hz), 139.8 (dd,  $J = 13.9, 10.9$  Hz), 135.2 (d,  $J = 13.6$  Hz), 134.2 (dd,  $J = 225.0, 2.1$  Hz), 132.4 (qd,  $J = 33.0, 8.0$  Hz), 129.6 (d,  $J = 4.5$  Hz), 128.6 (d,  $J = 15.0$  Hz), 123.2 (q,  $J = 271.6$  Hz), 121.7 (quint,  $J = 3.6$  Hz), 117.2 (d,  $J = 10.0$  Hz), 113.4 (dq,  $J = 24.0, 3.8$  Hz), 88.7 (d,  $J = 27.0$  Hz), 40.8 (d,  $J = 4.5$  Hz);  $^{19}\text{F}$  NMR (565 MHz,  $\text{CDCl}_3$ )  $\delta$  -62.8 (s, 3 F), -115.8 (s, 1 F), -116.8 (d, 1 F,  $J = 11.3$  Hz), -164.0 (d, 1 F,  $J = 11.3$  Hz); HRMS (HESI)  $m/z$  calcd for  $\text{C}_{14}\text{H}_{10}\text{N}_3\text{O}_2\text{F}_6$   $[\text{M}+\text{H}]^+$  366.0672, found 366.0669.

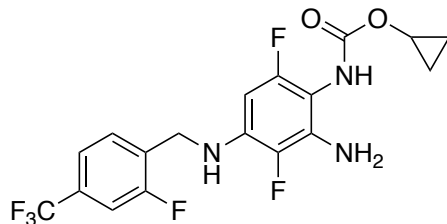

### Cyclopropyl

### (2-amino-3,6-difluoro-4-((2-fluoro-4-

**(trifluoromethyl)benzyl)amino)phenyl)carbamate (RL-46).** A solution of **5g** (0.366 g, 1.00 mmol) in MeOH (10 mL) was treated with zinc powder (0.327 g, 5.00 mmol) followed by 5 M aqueous ammonium chloride solution (1.00 mL, 5.00 mmol) and vigorously stirred at room temperature for 2 h. The reaction mixture was filtered through Celite, and the filtrate was concentrated in vacuo, and dissolved in EtOAc and saturated aqueous NaHCO<sub>3</sub>. The aqueous layer was extracted with EtOAc (3 x 10 mL), and the combined organic layers were dried (Na<sub>2</sub>SO<sub>4</sub>), filtered, and concentrated in vacuo. A solution of the residue in dry CH<sub>2</sub>Cl<sub>2</sub> (20 mL), was treated sequentially with diisopropylethylamine (0.21 mL, 1.20 mmol) and cyclopropyl chloroformate (0.41 mL, 0.90 mmol). The mixture was stirred vigorously at room temperature for 4 h, quenched with saturated aqueous NaHCO<sub>3</sub> solution, and extracted with CH<sub>2</sub>Cl<sub>2</sub> (3 x 10 mL). The combined organic extracts were dried (Na<sub>2</sub>SO<sub>4</sub>), concentrated under reduced pressure, and purified by chromatography on SiO<sub>2</sub> (EtOAc/hexanes, 3:7 to 1:1, containing Et<sub>3</sub>N(1%)) to afford a light yellow solid that was recrystallized (CH<sub>2</sub>Cl<sub>2</sub>/hexanes) to give **RL-46** (0.17 g, 41 %) as a colorless solid: Mp 192-194 °C; IR (ATR) 3302, 1694, 1659, 1541, 1430, 1337, 1271, 1122 cm<sup>-1</sup>; <sup>1</sup>H NMR (400 MHz, DMSO-d<sub>6</sub>, 353 K) δ 7.91 (brs, 1 H), 7.65-7.51 (m, 3 H), 5.92 (br, 1 H), 5.76 (dd, 1 H, *J* = 12.1, 1.6 Hz), 4.71 (br s, 2 H), 4.43 (d, 2 H, *J* = 6.3 Hz), 4.00 (sept, 1 H, *J* = 3.2 Hz), 0.66-0.57 (m, 4 H); <sup>13</sup>C NMR (151 MHz, acetone-d<sub>6</sub>) 161.3 (d, *J* = 246.8 Hz), 157.9, 157.1 (d, *J* = 236.7 Hz), 137.2 (d, *J* = 231.6 Hz), 136.7-136.2 (m), 135.5 (dd, *J* = 12.1, 5.4 Hz), 132.6 (d, *J* = 14.5 Hz), 131.2 (qd, *J* = 33.0, 8.1 Hz), 131.0 (d, *J* = 4.6 Hz), 124.5 (qd, *J* = 271.6, 2.2 Hz), 122.3 -122.0 (m), 113.3 (dq, *J* = 25.2, 3.9 Hz), 102.7 (dd, *J* = 18.0, 4.4 Hz), 87.8 (d, *J* = 27.3 Hz), 49.8, 41.0 (d, *J* = 4.3 Hz), 5.3; <sup>19</sup>F NMR (565 MHz, acetone-d<sub>6</sub>) δ -63.0 (s, 3 F), -117.8 (s, 1 F), -127.7 (d, 1 F, *J* = 11.3 Hz), -163.4 (d, 1 F, *J* = 11.3 Hz); HRMS (HESI) *m/z* calcd for C<sub>18</sub>H<sub>16</sub>N<sub>3</sub>O<sub>2</sub>F<sub>6</sub> [M+H]<sup>+</sup> 420.1141, found 420.1139.

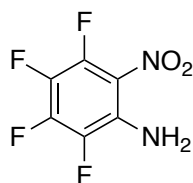

**2,3,4,5-Tetrafluoro-6-nitroaniline (4e).**<sup>3</sup> To a 3-neck round bottom flask flushed with N<sub>2</sub> were added pentafluoronitrobenzene (0.45 g, 2.01 mmol), Et<sub>2</sub>O (10 mL), and 28% aqueous ammonium hydroxide (0.56 mL, 4.01 mmol) dropwise over the course of 4 h. After addition of water, the aqueous layer was extracted with Et<sub>2</sub>O (2 x 5 mL). The combined organic layers were dried (Na<sub>2</sub>SO<sub>4</sub>), filtered, and concentrated under reduced pressure. The residue was purified by chromatography on SiO<sub>2</sub> (EtOAc/hexanes, 1:9 to 1:4) to afford 2,3,5,6-tetrafluoro-4-nitroaniline (0.097g, 23%) as a light yellow solid and 2,3,4,5-tetrafluoro-6-nitroaniline (0.24 g, 57%) as a yellow solid: Mp 41-43 °C; IR(ATR) 3494, 3373, 2923, 1668, 1606, 1538, 1519, 1351, 1255, 1121, 998 cm<sup>-1</sup>; <sup>1</sup>H NMR (500 MHz, CDCl<sub>3</sub>) δ 5.78 (brs); <sup>13</sup>C NMR (151 MHz, CDCl<sub>3</sub>) δ 143.9 (dtd, *J* = 262.6, 12.7, 4.7 Hz), 144.3 (dtd, *J* = 260.2, 13.9, 4.5 Hz), 136.3 (ddd, *J* = 243.1, 12.2, 3.7 Hz), 133.3 (dt, *J* = 246.0, 15.1 Hz), 132.3 (d, *J* = 12.9 Hz), 121.2; <sup>19</sup>F NMR (471 MHz, CDCl<sub>3</sub>) δ -144.7 (dt, 1 F, *J* = 22.7, 9.3 Hz), -147.1 (td, 1 F, *J* = 21.3, 8.9 Hz), -160.4 to -160.1 (m, 1 F), -172.1 (td, 1 F, *J* = 22.4, 5.2 Hz); HRMS (HESI) *m/z* calcd for C<sub>6</sub>H<sub>N</sub><sub>2</sub>O<sub>2</sub>F<sub>4</sub> [M-H]<sup>-</sup> 208.9969, found 208.9976.

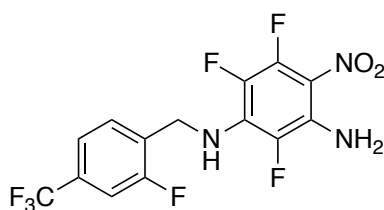

**2,5,6-Trifluoro-*N*<sup>1</sup>-(2-fluoro-4-(trifluoromethyl)benzyl)-4-nitrobenzene-1,3-diamine (5h).** To an oven dried sealable vial were added **3d** (0.39 g, 2.00 mmol) and **4e** (0.40 g, 1.90 mmol). The vial was evacuated, backfilled with N<sub>2</sub> (3 x), and dry DMSO (2.0 mL) was added followed by Et<sub>3</sub>N (0.32 mL, 2.28 mmol) and I<sub>2</sub> (24 mg, 0.09 mmol). The vial was sealed and the reaction mixture was heated to 120 °C for 42 h, cooled to room temperature, diluted with water (20 mL) and extracted with CH<sub>2</sub>Cl<sub>2</sub> (3 x 10 mL). The combined organic layers were washed with brine (2 x 10 mL), dried (Na<sub>2</sub>SO<sub>4</sub>), filtered and concentrated under reduced

pressure. The residue was purified by chromatography on SiO<sub>2</sub> (EtOAc/hexanes, 1:4 to 1:3, containing Et<sub>3</sub>N (0.2%)) to afford a yellow solid that was recrystallized (CH<sub>2</sub>Cl<sub>2</sub>/hexanes) to afford **5h** (0.37 g, 51%) as a yellow solid: Mp 119-121 °C; <sup>1</sup>H NMR (400 MHz, CDCl<sub>3</sub>) δ 7.50-7.40 (m, 2 H), 7.36 (d, 1 H, *J* = 10.0 Hz), 5.86 (br s, 2 H), 4.78 (s, 3 H); <sup>13</sup>C NMR (151 MHz, CDCl<sub>3</sub>) δ 160.5 (d, *J* = 249.0 Hz), 144.2 (ddd, *J* = 258.6, 14.2, 3.0 Hz), 134.1 (dm, *J* = 228.2 Hz), 133.1 (d, *J* = 14.7 Hz), 132.8 (ddd, *J* = 235.2, 16.7, 7.9 Hz), 132.3 (qd, *J* = 33.6, 8.1 Hz), 131.4 (td, *J* = 11.5, 3.8 Hz), 129.9 (d, *J* = 4.1 Hz), 129.7 (d, *J* = 14.2 Hz), 123.2 (qd, *J* = 272.7, 2.1 Hz), 121.9-121.5 (m), 115.9, 113.29 (dq, *J* = 24.6, 3.5 Hz), 43.1 (dd, *J* = 12.7, 4.5 Hz); <sup>19</sup>F NMR (565 MHz, CDCl<sub>3</sub>) δ -62.8 (s, 3 F), -116.3 (s, 1 F), -147.1 (dd, 1 F, *J* = 22.6, 5.7 Hz), -160.8 (d, 1 F, *J* = 11.3 Hz), -169.7 (d, 1 F, *J* = 17.0 Hz); HRMS (HESI) *m/z* calcd for C<sub>14</sub>H<sub>9</sub>N<sub>3</sub>O<sub>2</sub>F<sub>7</sub> [M+H]<sup>+</sup> 384.0578, found 384.0575.

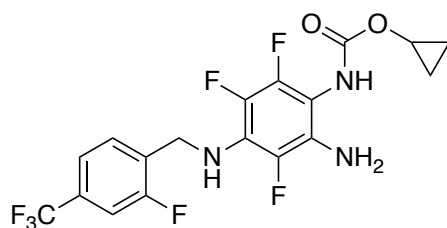

**Cyclopropyl (2-amino-3,5,6-trifluoro-4-((2-fluoro-4-(trifluoromethyl)benzyl)amino)phenyl)carbamate (RL-50).** A suspension of **5h** (0.383 g, 1.00 mmol) and zinc powder (0.327 g, 5.00 mmol) in MeOH (10 mL) was treated dropwise with 5 M aqueous ammonium chloride solution (1.00 mL) and stirred vigorously at room temperature for 1 h. The reaction mixture was filtered through Celite, and the filtrate was concentrated, and diluted with EtOAc and saturated aqueous NaHCO<sub>3</sub>. The aqueous layer was extracted with EtOAc (3 x 10 mL), dried (Na<sub>2</sub>SO<sub>4</sub>), filtered, and concentrated in vacuo. A solution of the yellow residue in dry CH<sub>2</sub>Cl<sub>2</sub> (20 mL) was treated with diisopropylethylamine (0.21 mL, 1.20 mmol), followed by cyclopropyl chloroformate (0.50 mL, 1.00 mmol). The resulting mixture was stirred vigorously at room temperature for 4 h, and quenched with saturated aqueous NaHCO<sub>3</sub> solution. The aqueous layer was extracted with CH<sub>2</sub>Cl<sub>2</sub> (3 x 10 mL), and the combined organic layers were dried (Na<sub>2</sub>SO<sub>4</sub>), concentrated under reduced pressure and purified by chromatography on SiO<sub>2</sub> (EtOAc/hexanes, 1:4 to 3:7, containing Et<sub>3</sub>N (1%)) to yield a light yellow solid that was recrystallized from CH<sub>2</sub>Cl<sub>2</sub>/hexanes to afford

**RL-50** (0.089 g, 20 %) as a colorless solid: Mp 126-128 °C; IR (ATR) 3365, 1721, 1514, 1330, 1170, 1127  $\text{cm}^{-1}$ ;  $^1\text{H}$  NMR (400 MHz,  $\text{DMSO-d}_6$ , 373 K)  $\delta$  8.05 (brs, 1 H), 7.66 (t, 1 H,  $J = 7.6$  Hz), 7.57-7.37 (m, 2 H), 5.56 (t, 1 H,  $J = 6.8$  Hz), 4.57 (d, 2 H,  $J = 6.8$  Hz), 4.52 (brs, 2 H), 4.04 (sept, 1 H,  $J = 3.2$  Hz), 0.71-0.57 (m, 4 H);  $^{13}\text{C}$  NMR (151 MHz,  $\text{CD}_3\text{OD}$ )  $\delta$  161.7 (d,  $J = 247.5$  Hz), 158.3, 146.2 (ddd,  $J = 238.5, 12.0, 3.0$  Hz), 138.9 (d,  $J = 226.9$  Hz), 135.3 (d,  $J = 232.2$  Hz), 133.6 (d,  $J = 14.6$  Hz), 132.0 (qd,  $J = 33.2, 8.2$  Hz), 131.6 (d,  $J = 14.1$  Hz), 131.2 (d,  $J = 4.2$  Hz), 126.7 (t,  $J = 11.6$  Hz), 124.9 (qd,  $J = 268.5, 2.4$  Hz), 122.3-122.0 (m), 113.5 (dq,  $J = 25.4, 3.5$  Hz), 104.1-103.8 (m), 50.7, 43.7, 5.5;  $^{19}\text{F}$  NMR (565 MHz,  $\text{CD}_3\text{OD}$ )  $\delta$  -64.1 (s, 3 F), -119.0 (s, 1 F), -153.7 (dd, 1 F,  $J = 20.9, 7.3$  Hz), -158.7 (d, 1 F,  $J = 5.7$  Hz), -172.0 (d, 1 F,  $J = 21.4$  Hz); HRMS (HESI)  $m/z$  calcd for  $\text{C}_{18}\text{H}_{15}\text{N}_3\text{O}_2\text{F}_7$   $[\text{M}+\text{H}]^+$  438.1047, found 438.1044.

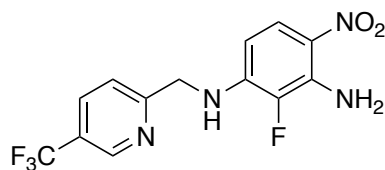

**2-Fluoro-4-nitro- $N^1$ -((5-(trifluoromethyl)pyridin-2-yl)methyl)benzene-1,3-diamine (5i).** 2-(Aminomethyl)-5-(trifluoromethyl)pyridine hydrochloride (0.180 g, 0.804 mmol) was neutralized with 1 M NaOH (0.84 mL). The resulting aqueous solution was extracted with  $\text{CH}_2\text{Cl}_2$  (3 x). The combined organic layers were dried ( $\text{Na}_2\text{SO}_4$ ), and concentrated in vacuo to give a yellowish oil that was dissolved in dry DMSO (1.6 mL) and treated with 2,3-difluoro-6-nitroaniline **4a** (0.144 g, 0.804 mmol) followed by  $\text{Et}_3\text{N}$  (0.12 mL, 0.885 mmol) and  $\text{I}_2$  (8 mg, 0.03 mmol, 0.04 equiv). The reaction mixture was heated to 120 °C for 30 h, cooled to room temperature, diluted with water (15 mL) and extracted with  $\text{CH}_2\text{Cl}_2$  (3 x 10 mL). The combined organic layers were washed with brine (2 x 10 mL), dried ( $\text{Na}_2\text{SO}_4$ ), filtered and concentrated under reduced pressure. The residue was purified by chromatography on  $\text{SiO}_2$  (acetone/hexanes, 1:8 to 1:5 to 1:4, containing  $\text{Et}_3\text{N}$ (0.2%)) to give **5i** (0.20 g, 75 %) as a yellow solid: Mp 138.2-138.5 °C; IR (ATR) 3484, 3370, 1629, 1607, 1551, 1482, 1325, 1282, 1251, 1126, 1077, 1018, 755  $\text{cm}^{-1}$ ;  $^1\text{H}$  NMR (400 MHz,  $\text{CDCl}_3$ )  $\delta$  8.88 (s, 1 H), 7.95-7.87 (m, 2 H), 7.44 (d, 1 H,  $J = 8.4$  Hz), 6.10-6.05 (m, 3 H), 5.72 (br s, 1H), 4.66 (d, 2 H,  $J = 5.6$  Hz);  $^{13}\text{C}$  NMR (100 MHz,  $\text{CDCl}_3$ )  $\delta$  160.4, 146.5 (q,  $J = 4.0$  Hz), 140.7 (d,  $J = 9.0$  Hz), 138.1 (d,  $J = 227.0$  Hz), 135.3 (d,  $J = 13.0$  Hz), 134.2 (q,  $J = 3.5$  Hz), 126.0 (q,  $J = 33.0$  Hz),



125.6 (d,  $J = 3.0$  Hz), 123.7 (d,  $J = 3.0$  Hz), 123.5 (q,  $J = 271.0$  Hz), 121.3, 100.9 (d,  $J = 3.0$  Hz), 47.8;  $^{19}\text{F}$  NMR (376 MHz,  $\text{CDCl}_3$ )  $\delta$  -62.3 (s, 3 F), -160.5 (s, 1 F); HRMS (HESI)  $m/z$  calcd for  $\text{C}_{13}\text{H}_{11}\text{N}_4\text{O}_2\text{F}_4$   $[\text{M}+\text{H}]^+$  331.0813, found 331.0811.

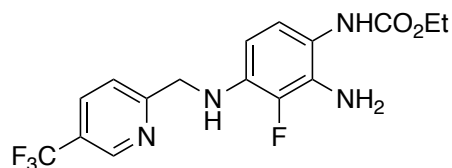

**Ethyl (2-amino-3-fluoro-4-(((5-(trifluoromethyl)pyridin-2-yl)methyl)amino)phenyl)carbamate (RL-31).** A solution of **5i** (0.165 g, 0.5 mmol) in EtOH (2.5 mL) was treated with 10% Pd/C (0.025 g) under  $\text{N}_2$  and stirred at room temperature for 5 h under an atmosphere of  $\text{H}_2$  gas (balloon). The reaction mixture was filtered through Celite ( $\text{CH}_2\text{Cl}_2$ ), and concentrated in vacuo to afford a brown solid (0.135 g, 0.43 mmol, 90%) that was dissolved in  $\text{CH}_2\text{Cl}_2$  (8 mL) and treated under argon at 0 °C with diisopropylethylamine (0.08 mL, 0.48 mmol) followed by ethyl chloroformate (0.038 mL, 0.39 mmol) dropwise at 0 °C. The reaction mixture was stirred for 4 h at 0 °C, quenched with water, and extracted with  $\text{CH}_2\text{Cl}_2$  (3 x 5 mL). The combined organic extracts were dried ( $\text{Na}_2\text{SO}_4$ ), concentrated under reduced pressure, and purified by chromatography on  $\text{SiO}_2$  (hexanes/EtOAc, 2:1 to 1:1, in the presence of  $\text{Et}_3\text{N}$  (1%)) to yield a light yellow solid (0.078 g, 43%) that was recrystallized ( $\text{CH}_2\text{Cl}_2$ /hexanes) to afford **RL-31** (0.048 g) as a colorless solid: Mp 153.6-154.2 °C; IR (ATR) 3303, 1685, 1638, 1540, 1532, 1528, 1329, 1260, 1128, 764, 751  $\text{cm}^{-1}$ ;  $^1\text{H}$  NMR (400 MHz,  $\text{CDCl}_3$ )  $\delta$  8.84 (s, 1 H), 7.86 (dd, 1 H,  $J = 8.4, 2.0$  Hz), 7.46 (d, 1 H,  $J = 8.4$  Hz), 6.72 (d, 1 H,  $J = 8.4$  Hz), 6.30 (br s, 1 H), 5.96 (t, 1 H,  $J = 8.8$  Hz), 4.85 (br s, 1 H), 4.53 (d, 2 H,  $J = 5.6$  Hz), 4.18 (q, 2 H,  $J = 7.2$  Hz), 3.88 (brs, 2 H), 1.27 (t, 3 H,  $J = 7.2$  Hz);  $^{13}\text{C}$  NMR (100 MHz,  $\text{CDCl}_3$ )  $\delta$  162.9, 155.5, 146.4 (q,  $J = 4.0$  Hz), 141.4 (d,  $J = 230.4$  Hz), 134.7 (d,  $J = 9.8$  Hz), 134.0 (q,  $J = 3.4$  Hz), 131.0, 125.3 (q,  $J = 33.0$  Hz), 123.6 (q,  $J = 272.2$  Hz), 121.7, 121.1, 115.5, 101.8, 61.7, 49.1, 14.7;  $^{19}\text{F}$  NMR (376 MHz,  $\text{CDCl}_3$ )  $\delta$  -62.3 (s, 3 F), -155.8 (s, 1 F); HRMS (HESI)  $m/z$  calcd for  $\text{C}_{16}\text{H}_{17}\text{N}_4\text{O}_2\text{F}_4$   $[\text{M}+\text{H}]^+$  373.1282, found 373.1280.

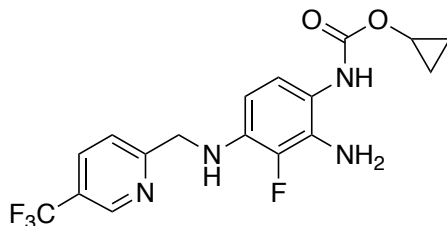

**Cyclopropyl (2-amino-3-fluoro-4-(((5-(trifluoromethyl)pyridin-2-yl)methyl)amino)phenyl)carbamate (RL-68).** A mixture of **5i** (0.33 g, 1.00 mmol) and zinc powder (0.327 g, 5.00 mmol) in MeOH (10 mL) was treated dropwise with 5 M aqueous ammonium chloride solution (1.00 mL, 5.00 mmol) and stirred vigorously at room temperature for 1 h. The reaction mixture was filtered through Celite, and the filtrate was concentrated, diluted with EtOAc and saturated aqueous NaHCO<sub>3</sub>. The aqueous layer was extracted with EtOAc (3 x 10 mL), dried (Na<sub>2</sub>SO<sub>4</sub>), filtered, concentrated in vacuo. and dissolved in dry CH<sub>2</sub>Cl<sub>2</sub> (20 mL). After addition of diisopropylethylamine (0.21 mL, 1.20 mmol) and cyclopropyl chloroformate (0.50 mL, 1.00 mmol), the reaction mixture was stirred vigorously at room temperature for 4 h and quenched with saturated aqueous NaHCO<sub>3</sub>. The aqueous layer was extracted with CH<sub>2</sub>Cl<sub>2</sub> (3 x 10 mL), and the combined organic extracts were dried (Na<sub>2</sub>SO<sub>4</sub>), concentrated under reduced pressure, and purified by chromatography on SiO<sub>2</sub> (EtOAc/hexanes, 3:7 to 1:1, containing Et<sub>3</sub>N (1%)) to yield a light yellow solid that was recrystallized (CH<sub>2</sub>Cl<sub>2</sub>/hexanes) to afford **RL-68** (0.089 g, 23%) as a colorless solid: Mp 170-171 °C; IR (ATR) 3308, 1691, 1529, 1327, 1123, 1079, 1020, 768 cm<sup>-1</sup>; <sup>1</sup>H NMR (600 MHz, CD<sub>3</sub>OD) δ 8.81 (s, 1 H), 8.02 (d, 1 H, *J* = 7.8 Hz), 7.60 (d, 1 H, *J* = 7.8 Hz), 6.65 (d, 1 H, *J* = 7.2 Hz), 5.89 (t, 1 H, *J* = 7.8 Hz), 4.53 (s, 2 H), 4.10-3.97 (m, 1 H), 0.87-0.42 (m, 4 H); <sup>13</sup>C NMR (151 MHz, CD<sub>3</sub>OD) δ 165.9, 158.4, 146.8, 142.4 (d, *J* = 230.2 Hz), 136.0, 135.5, 132.6, 126.3 (q, *J* = 33.0 Hz), 125.2 (q, *J* = 271.9 Hz), 123.0, 122.7, 116.4, 102.2, 50.3, 49.6, 5.5; <sup>19</sup>F NMR (565 MHz, CD<sub>3</sub>OD) δ -63.7 (s, 3 F), -157.8 (s, 1 F); HRMS (HESI) *m/z* calcd for C<sub>17</sub>H<sub>17</sub>N<sub>4</sub>O<sub>2</sub>F<sub>4</sub> [M+H]<sup>+</sup> 385.1282, found 385.1280.

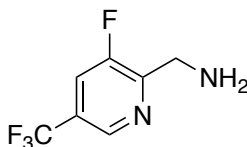

**(3-Fluoro-5-(trifluoromethyl)pyridin-2-yl)methanamine (3f).** A solution of 3-fluoro-5-(trifluoromethyl)picolinonitrile (2.20 g, 11.57 mmol) in MeOH (20 mL) was treated with 10% Pd/C (0.616 g, 0.579 mmol) and concentrated HCl (1.07 mL, 12.73 mmol) and stirred at room temperature for 15 h under an atmosphere of H<sub>2</sub> (balloon). The reaction mixture was filtered through Celite, and the Celite was washed with MeOH and water. The filtrate was concentrated to remove the MeOH, treated with additional water, and the aqueous solution was extracted with CH<sub>2</sub>Cl<sub>2</sub> (3 x 10 mL). The aqueous layer was treated with 1 N NaOH (13 mL) and extracted with CH<sub>2</sub>Cl<sub>2</sub> (3 x 15 mL). The combined organic layers were dried (Na<sub>2</sub>SO<sub>4</sub>), filtered, concentrated in vacuo to afford **3f** as green-blue oil (1.32 g, 59%): IR (ATR) 3377, 2913, 1416, 1333, 1127, 932 cm<sup>-1</sup>; <sup>1</sup>H NMR (400 MHz, CDCl<sub>3</sub>) δ 8.51 (s, 1 H), 7.45 (d, 1 H, *J* = 8.8 Hz), 3.96 (s, 2 H), 1.69 (s, 2 H); <sup>13</sup>C NMR (100 MHz, CDCl<sub>3</sub>) δ 156.1 (d, *J* = 258.0 Hz), 154.3 (d, *J* = 15.0 Hz), 141.8-141.5 (m), 126.3 (qd, *J* = 33.0, 3.0 Hz), 122.6 (qd, *J* = 271.0, 1.0 Hz), 119.7 (dq, *J* = 22.0, 3.5 Hz), 41.5; <sup>19</sup>F NMR (376 MHz, CDCl<sub>3</sub>) δ -62.5 (s, 3 F), -126.1 (s, 1 F); HRMS (HESI) *m/z* calcd for C<sub>7</sub>H<sub>7</sub>N<sub>2</sub>F<sub>4</sub> [M+H]<sup>+</sup> 195.0540, found 195.0540.

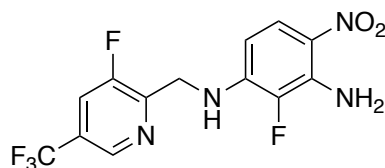

**2-Fluoro-N<sup>1</sup>-((3-fluoro-5-(trifluoromethyl)pyridin-2-yl)methyl)-4-nitrobenzene-1,3-diamine (5j).** An oven-dried sealable vial was charged with **3f** (0.46 g, 2.37 mmol) and 2,3-difluoro-6-nitroaniline **4a** (0.433 g, 2.49 mmol evacuated and backfilled with N<sub>2</sub> (3 x), and treated with dry DMSO (2.5 mL) followed by Et<sub>3</sub>N (0.37 mL, 2.61 mmol) and I<sub>2</sub> (0.030 g, 0.118 mmol). The vial was sealed and the reaction mixture was heated to 100 °C for 6 h, cooled to room temperature, diluted with water (30 mL) and extracted with EtOAc (3 x 10 mL). The combined organic layers were washed with brine (2 x 5 mL), dried (Na<sub>2</sub>SO<sub>4</sub>), filtered and concentrated under reduced pressure. The residue was purified by chromatography on SiO<sub>2</sub> (EtOAc/hexanes, 1:4, containing Et<sub>3</sub>N (0.5%)) to afford **5j** (0.37 g, 45%) as a yellow solid: Mp 158.9-161.2 °C; IR (ATR) 3385, 1629, 1483, 1418, 1334, 1278, 1126, 933, 741 cm<sup>-1</sup>; <sup>1</sup>H NMR (600 MHz, acetone-d<sub>6</sub>) δ 8.78 (s, 1 H), 8.07 (d, 1 H, *J* = 9.6 Hz), 7.81 (dd, 1 H, *J* = 9.6, 1.2 Hz), 6.69 (brs, 2 H), 6.50 (brs, 1 H), 6.39 (dd, 1 H, *J* = 9.6, 8.4 Hz), 4.85 (d, 2 H, *J* = 5.4 Hz); <sup>13</sup>C NMR

(151 MHz, acetone- $d_6$ )  $\delta$  157.7 (d,  $J$  = 260.0 Hz), 151.1 (d,  $J$  = 15.3 Hz), 142.5-142.3 (m), 142.2 (d,  $J$  = 9.5 Hz), 138.7 (d,  $J$  = 228.2 Hz), 136.6 (d,  $J$  = 13.2 Hz), 127.5 (qd,  $J$  = 33.5, 3.5 Hz), 125.6 (d,  $J$  = 3.7 Hz), 123.9 (q,  $J$  = 272.2 Hz), 123.8 (d,  $J$  = 2.9 Hz), 121.5 (dq,  $J$  = 21.7, 3.6 Hz), 101.8 (d,  $J$  = 3.0 Hz), 43.1;  $^{19}\text{F}$  NMR (376 MHz,  $\text{CDCl}_3$ )  $\delta$  -62.1 (s, 3 F), -124.7 (s, 1 F), -160.5 (s, 1 F); HRMS (HESI)  $m/z$  calcd for  $\text{C}_{13}\text{H}_{10}\text{N}_4\text{O}_2\text{F}_5$   $[\text{M}+\text{H}]^+$  349.0718, found 349.0716.

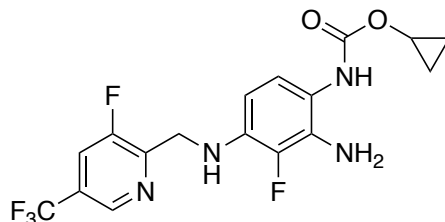

**Cyclopropyl (2-amino-3-fluoro-4-(((3-fluoro-5-(trifluoromethyl)pyridin-2-yl)methyl)amino)phenyl)carbamate (RL-96).** A solution of **5j** (0.23 g, 0.66 mmol) in MeOH (7 mL) was treated with zinc powder (0.216 g, 3.30 mmol) followed by a 5 M aqueous ammonium chloride solution (0.66 mL, 3.30 mmol). The reaction mixture was stirred vigorously at room temperature for 2h, filtered through Celite, and the filtrate was concentrated, diluted with EtOAc and saturated aqueous  $\text{NaHCO}_3$ . The aqueous layer was extracted with EtOAc (3 x 10 mL), and the combined organic layers were dried ( $\text{Na}_2\text{SO}_4$ ), filtered, and concentrated in vacuo. A solution of the residue in dry  $\text{CH}_2\text{Cl}_2$  (20 mL) was treated with diisopropylethylamine (0.14 mL, 0.79 mmol) followed by a 1 M solution of cyclopropyl chloroformate in toluene (0.66 mL, 0.66 mmol). The reaction mixture was stirred vigorously at room temperature for 4 h, and quenched with saturated aqueous  $\text{NaHCO}_3$ . The aqueous layer was extracted with  $\text{CH}_2\text{Cl}_2$  (3 x 10 mL), and the combined organic extracts were dried ( $\text{Na}_2\text{SO}_4$ ), evaporated under reduced pressure, and purified by chromatography on  $\text{SiO}_2$  (EtOAc/hexanes, 3:7 to 1:1, containing  $\text{Et}_3\text{N}$  (1%)) to yield a light-yellow solid that was recrystallized ( $\text{CH}_2\text{Cl}_2$ /hexanes) to afford **RL-96** (0.088 g, 33%) as a colorless solid: Mp 162.6-163.5  $^\circ\text{C}$ ; IR (ATR) 3333, 1701, 1540, 1415, 1331, 1130  $\text{cm}^{-1}$ ;  $^1\text{H}$  NMR (600 MHz,  $\text{CDCl}_3$ )  $\delta$  8.69 (s, 1 H), 7.63 (d, 1 H,  $J$  = 8.4 Hz), 6.81 (s, 1 H), 6.27-6.19 (d, 1 H,  $J$  = 8.4 Hz), 6.15 (br s, 1 H), 5.13 (brs, 1 H), 4.56 (s, 2 H), 4.18-4.08 (m, 1 H), 3.84 (br s, 2 H), 0.80-0.55 (m, 4 H);  $^{13}\text{C}$  NMR (151 MHz,  $\text{CDCl}_3$ )  $\delta$  156.7 (d,  $J$  = 260.8 Hz), 155.6, 150.3 (d,  $J$  = 14.9 Hz), 142.0-141.6 (m), 141.8 (d,  $J$  = 231.8 Hz), 134.7, 130.7, 127.1 (q,  $J$  = 33.7 Hz), 122.7

(q,  $J = 272.6$  Hz), 121.5, 120.3 (dq,  $J = 21.6, 3.3$  Hz), 115.6, 102.3, 49.9, 43.2, 5.3;  $^{19}\text{F}$  NMR (376 MHz,  $\text{CDCl}_3$ )  $\delta$  -62.1 (s, 3 F), -124.9 (s, 1 F), -155.4 (s, 1 F); HRMS (HESI)  $m/z$  calcd for  $\text{C}_{17}\text{H}_{16}\text{N}_4\text{O}_2\text{F}_5$   $[\text{M}+\text{H}]^+$  403.1188, found 403.1185.

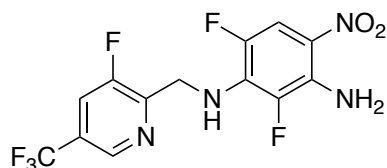

**2,6-Difluoro- $N^1$ -((3-fluoro-5-(trifluoromethyl)pyridin-2-yl)methyl)-4-nitrobenzene-1,3-diamine (5k).** An oven-dried sealable vial was charged with **3f** (0.243 g, 1.25 mmol) and 2,3,4-trifluoro-6-nitroaniline **4c** (0.200 g, 1.04 mmol), evacuated and backfilled with  $\text{N}_2$  (3 x), and charged with dry DMSO (2 mL),  $\text{Et}_3\text{N}$  (0.18 mL, 1.25 mmol) and  $\text{I}_2$  (0.132 g, 0.520 mmol). The vial was sealed and the reaction mixture was heated to 60 °C for 30 h before cooling to room temperature, diluted with water (20 mL) and extracted with EtOAc (3 x 10 mL). The combined organic layers were washed with brine (2 x 5 mL), dried ( $\text{Na}_2\text{SO}_4$ ), filtered, concentrated under reduced pressure, and purified by chromatography on  $\text{SiO}_2$  (EtOAc/hexanes, 1:4, containing  $\text{Et}_3\text{N}$  (0.2%)) to afford **5k** (0.221 g, 58%) as a yellow solid: Mp 157.6-158.4 °C; IR (ATR) 3314, 1548, 1474, 1412, 1339, 1256, 1136  $\text{cm}^{-1}$ ;  $^1\text{H}$  NMR (400 MHz, acetone- $d_6$ )  $\delta$  8.78 (s, 1 H), 8.07 (d, 1 H,  $J = 9.2$  Hz), 7.61 (d, 1 H,  $J = 9.2$  Hz), 6.76 (brs, 2 H), 6.40 (brs, 1 H), 5.02 (s, 2 H);  $^{13}\text{C}$  NMR (100 MHz, acetone- $d_6$ )  $\delta$  157.2 (d,  $J = 259.6$  Hz), 151.4 (d,  $J = 15.0$  Hz), 143.6 (dd,  $J = 231.8, 8.8$  Hz), 142.6-142.2 (m), 139.2 (dd,  $J = 230.7, 7.0$  Hz), 135.9 (d,  $J = 14.6$  Hz), 133.4 (dd,  $J = 15.6, 10.7$  Hz), 127.4 (qd,  $J = 33.6, 3.6$  Hz), 123.9 (q,  $J = 271.9$  Hz), 121.8-121.4 (m), 121.4 (dq,  $J = 22.0, 3.6$  Hz), 107.4 (dd,  $J = 24.9, 2.1$  Hz), 44.5-44.3 (m);  $^{19}\text{F}$  NMR (376 MHz, acetone- $d_6$ )  $\delta$  -62.1 (s, 3 F), -125.1 (s, 1 F), -143.3 (d, 1 F,  $J = 6.6$  Hz), -155.7 (d, 1 F,  $J = 6.6$  Hz); HRMS (HESI)  $m/z$  calcd for  $\text{C}_{13}\text{H}_9\text{N}_4\text{O}_2\text{F}_6$   $[\text{M}+\text{H}]^+$  367.0624, found 367.0623.

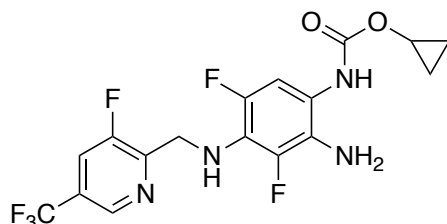

**Cyclopropyl (2-amino-3,5-difluoro-4-(((3-fluoro-5-(trifluoromethyl)pyridin-2-yl)methyl)amino)phenyl)carbamate (RL-01).** A solution of **5k** (0.220 g, 0.601 mmol) in MeOH (6 mL) was treated with zinc powder (0.196 g, 3.00 mmol) followed by a 5 M aqueous ammonium chloride solution (0.60 mL, 3.00 mmol). The reaction mixture was stirred vigorously at room temperature for 2 h, filtered through Celite, and the filtrate was concentrated in vacuo, diluted with EtOAc and saturated aqueous NaHCO<sub>3</sub>. The aqueous layer was extracted with EtOAc (3 x 10 mL), and the combined organic layers were dried (Na<sub>2</sub>SO<sub>4</sub>), filtered, and concentrated in vacuo. A solution of the residue in dry CH<sub>2</sub>Cl<sub>2</sub> (12 mL) was treated with diisopropylethylamine (0.125 mL, 0.721 mmol) followed by cyclopropyl chloroformate (0.43 mL, 0.600 mmol). The reaction mixture was stirred vigorously at room temperature for 4 h, quenched with saturated aqueous NaHCO<sub>3</sub>, and extracted with CH<sub>2</sub>Cl<sub>2</sub> (3 x 10 mL). The combined organic extracts were dried (Na<sub>2</sub>SO<sub>4</sub>), concentrated under reduced pressure, and purified by chromatography on SiO<sub>2</sub> (EtOAc/hexanes, 3:7 to 1:1, containing Et<sub>3</sub>N (1%)) to give a crude product that was recrystallized (CH<sub>2</sub>Cl<sub>2</sub>/hexanes) to afford **RL-01** (0.093 g, 37%) as a colorless solid: Mp 137-138 °C; IR (ATR) 3366, 1714, 1523, 1336, 1234, 1136 cm<sup>-1</sup>; <sup>1</sup>H NMR (600 MHz, CDCl<sub>3</sub>) δ 8.68 (s, 1 H), 7.60 (d, 1 H, *J* = 9.0 Hz), 6.91 (s, 1 H), 6.46 (s, 1 H), 4.90 (brs, 1 H), 4.71 (s, 2 H), 4.14-4.07 (m, 1 H), 3.42 (brs, 2 H), 0.78-0.60 (m, 4 H); <sup>13</sup>C NMR (151 MHz, CDCl<sub>3</sub>) δ 156.4 (d, *J* = 260.8 Hz), 155.0, 150.7 (d, *J* = 15.6 Hz), 146.6 (d, *J* = 230.7 Hz), 144.0 (d, *J* = 224.2 Hz), 141.9-141.6 (m), 127.0 (qd, *J* = 33.9, 3.0 Hz), 125.4, 123.2, 122.7 (q, *J* = 272.9 Hz), 120.3 (dq, *J* = 21.5, 3.3 Hz), 116.8, 107.1, 50.0, 45.4, 5.2; <sup>19</sup>F NMR (565 MHz, CDCl<sub>3</sub>) δ -62.1 (s, 3 F), -125.2 (s, 1 F), -139.5 (s, 1 F), -147.1 (s, 1 F); HRMS (HESI) *m/z* calcd for C<sub>17</sub>H<sub>15</sub>N<sub>4</sub>O<sub>2</sub>F<sub>6</sub> [M+H]<sup>+</sup> 421.1094, found 421.1093.

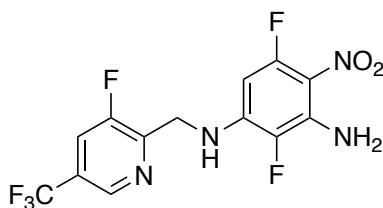

**2,5-Difluoro-N1-((3-fluoro-5-(trifluoromethyl)pyridin-2-yl)methyl)-4-nitrobenzene-1,3-diamine (5l).** An oven-dried sealable vial was charged with **3f** (0.364 g, 1.87 mmol) and 2,3,5-trifluoro-6-nitroaniline **4d** (0.300 g, 1.56 mmol), evacuated and back filled with N<sub>2</sub> (3x),

and charged with dry DMSO (3 mL) followed by Et<sub>3</sub>N (0.24 mL, 1.72 mmol) and I<sub>2</sub> (0.198 g, 0.781 mmol). The vial was sealed and the reaction mixture was heated to 60 °C for 30 h, cooled to room temperature, diluted with water (30 mL) and extracted with EtOAc (3 x 15 mL). The combined organic layers were washed with brine (2 x 10 mL), dried (Na<sub>2</sub>SO<sub>4</sub>), filtered and concentrated under reduced pressure. The residue was purified by chromatography on SiO<sub>2</sub> (acetone/hexanes, 1:4, containing Et<sub>3</sub>N (0.2%)) to yield a yellow solid that was recrystallized (EtOAc) to afford **5I** (0.21 g, 37%) as yellow powder: Mp 181-182 °C; IR (ATR) 3387, 1639, 1334, 1276, 1137 cm<sup>-1</sup>; <sup>1</sup>H NMR (400 MHz, DMSO-d<sub>6</sub>) δ 8.81 (s, 1 H), 8.29 (d, 1 H, *J* = 9.2 Hz), 7.39 (brs, 1 H), 6.90 (s, 2 H), 6.22 (dd, 1 H, *J* = 15.2, 7.2 Hz), 4.72 (d, 2 H, *J* = 5.6 Hz); <sup>13</sup>C NMR (151 MHz, DMSO-d<sub>6</sub>) δ 156.6 (d, *J* = 260.0 Hz), 155.1 (d, *J* = 252.7 Hz), 150.7 (d, *J* = 14.6 Hz), 141.7-141.5 (m), 141.0 (dd, *J* = 10.7, 14.6 Hz), 135.7 (d, *J* = 14.0 Hz), 133.2 (d, *J* = 226.6 Hz), 125.8 (qd, *J* = 33.1, 3.4 Hz), 122.9 (q, *J* = 272.8 Hz), 121.1 (dq, *J* = 21.9, 3.2 Hz), 115.0 (dd, *J* = 10.6, 3.2 Hz), 88.7 (d, *J* = 28.7 Hz), 42.1; <sup>19</sup>F NMR (376 MHz, acetone-d<sub>6</sub>) δ -60.5 (s, 3 F), -119.1 (d, 1 F, *J* = 11.3 Hz), -123.8 (s, 1 F), -160.6 (d, 1 F, *J* = 11.3 Hz); HRMS (HESI) *m/z* calcd for C<sub>13</sub>H<sub>9</sub>N<sub>4</sub>O<sub>2</sub>F<sub>6</sub> [M+H]<sup>+</sup> 367.0624, found 367.0621.

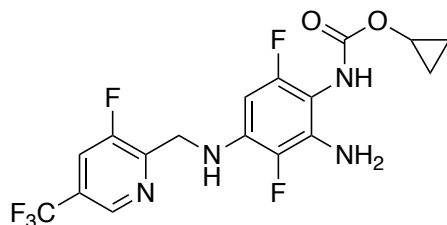

**Cyclopropyl (2-amino-3,6-difluoro-4-(((3-fluoro-5-(trifluoromethyl)pyridin-2-yl)methyl)amino)phenyl)carbamate (RL-12).** A solution of **5I** (0.200 g, 0.546 mmol) in MeOH (6 mL) was treated with zinc powder (0.179 g, 2.73 mmol) followed by a 5 M aqueous ammonium chloride solution (0.55 mL, 2.73 mmol). The reaction mixture was stirred vigorously at room temperature for 2 h, filtered through Celite, and the filtrate was concentrated, diluted with EtOAc and saturated aqueous NaHCO<sub>3</sub>. The aqueous layer was extracted with EtOAc (3 x 10 mL), dried (Na<sub>2</sub>SO<sub>4</sub>), filtered, and concentrated in vacuo. A solution of the residue in dry CH<sub>2</sub>Cl<sub>2</sub> (10 mL) was treated with diisopropylethylamine (0.12 mL, 0.68 mmol) followed by cyclopropyl chloroformate (0.39 mL, 0.546 mmol), stirred vigorously at room temperature for 4 h, and quenched with saturated aqueous NaHCO<sub>3</sub>. The

aqueous layer was extracted with CH<sub>2</sub>Cl<sub>2</sub> (3 x 10 mL), and the combined organic extracts were dried (Na<sub>2</sub>SO<sub>4</sub>), concentrated under reduced pressure, and purified by chromatography on SiO<sub>2</sub> (EtOAc/hexanes, 3:7 to 1:1, containing Et<sub>3</sub>N (1%)) to yield a beige solid that was recrystallized (CH<sub>2</sub>Cl<sub>2</sub>/hexanes) to afford **RL-12** (0.095 g, 41%) as an off-white solid: Mp 200-202 °C; IR (ATR) 3345, 1695, 1660, 1344, 1278, 1128 cm<sup>-1</sup>; <sup>1</sup>H NMR (600 MHz, DMSO-d<sub>6</sub>) δ 8.84 (s, 1 H), 8.28 (d, *J* = 9.6 Hz, 1 H), 8.17 (s, 1 H), 6.07 (brs, 1 H), 5.94-5.85 (m, 1 H), 4.94 (s, 2 H), 4.55 (d, *J* = 5.4 Hz, 2 H), 4.03-3.86 (m, 1 H), 0.72-0.38 (m, 4 H); <sup>13</sup>C NMR (151 MHz, DMSO-d<sub>6</sub>) δ 156.7 (d, *J* = 259.5 Hz), 155.7 (d, *J* = 236.1 Hz), 155.5, 151.6 (d, *J* = 14.4 Hz), 141.8-141.4 (m), 135.6 (d, *J* = 225.4 Hz), 135.7-135.3 (m), 134.5, 125.5 (qd, *J* = 33.0, 3.5 Hz), 122.9 (q, *J* = 272.7 Hz), 121.0 (dq, *J* = 22.1, 3.2 Hz), 100.8 (d, *J* = 16.1 Hz), 86.4 (d, *J* = 27.4 Hz), 48.8, 42.7, 4.8; <sup>19</sup>F NMR (565 MHz, DMSO-d<sub>6</sub>) δ -60.5 (s, 3 F), -124.0 (s, 1 F), -126.3 (d, 1 F, *J* = 11.3 Hz), -160.5 (d, 1 F, *J* = 11.3 Hz); HRMS (HESI) *m/z* calcd for C<sub>17</sub>H<sub>15</sub>N<sub>4</sub>O<sub>2</sub>F<sub>6</sub> [M+H]<sup>+</sup> 421.1094, found 421.1091.

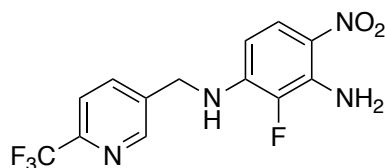

**2-Fluoro-4-nitro-N<sup>1</sup>-((6-(trifluoromethyl)pyridin-3-yl)methyl)benzene-1,3-diamine (5m).** A solution of 3-(aminomethyl)-6-(trifluoromethyl)pyridine **3g** (0.200 g, 1.08 mmol) and 2,3-difluoro-6-nitroaniline **4a** (0.203 g, 1.13 mmol) in dry DMSO (2 mL) was treated under N<sub>2</sub> with Et<sub>3</sub>N (0.16 mL, 1.19 mmol) and I<sub>2</sub> (11 mg, 0.04 mmol). The reaction mixture was heated to 120 °C for 30 h, cooled to room temperature, diluted with water (20 mL), and extracted with EtOAc (3 x 10 mL). The combined organic layers were washed with brine (2 x 10 mL), dried (Na<sub>2</sub>SO<sub>4</sub>), filtered, and concentrated under reduced pressure. The residue was purified by chromatography on SiO<sub>2</sub> (acetone/hexanes, 1:8 to 1:5 to 1:4, containing Et<sub>3</sub>N (1%)) to afford **5m** (0.302 g, 85%) as a yellow solid: Mp 151.8-152.2 °C; IR (ATR) 3478, 3364, 1631, 1484, 1335, 1286, 1251, 1178, 1131, 1085 cm<sup>-1</sup>; <sup>1</sup>H NMR (400 MHz, acetone-d<sub>6</sub>) δ 8.81 (s, 1 H), 8.08 (d, 1 H, *J* = 8.0 Hz), 7.82 (d, 1 H, *J* = 8.4 Hz), 7.78-7.75 (m, 1 H), 6.71 (brs, 3 H), 6.27-6.21 (m, 1 H), 4.80 (d, 2 H, *J* = 6.4 Hz); <sup>13</sup>C NMR (100 MHz, acetone-d<sub>6</sub>) δ 150.2, 147.2 (q, *J* = 34.0 Hz), 142.0 (d, *J* = 9.0 Hz), 139.6, 138.6 (d, *J* = 228.0 Hz), 137.3, 136.7 (d, *J* = 13.0 Hz),



125.6 (d,  $J = 4.0$  Hz), 123.9 (d,  $J = 2.0$  Hz), 122.8 (q,  $J = 271.0$  Hz), 121.2 (q,  $J = 2.7$  Hz), 101.5 (d,  $J = 3.3$  Hz), 44.2;  $^{19}\text{F}$  NMR (376 MHz, acetone- $d_6$ )  $\delta$  -68.2 (s, 3 F), -160.3 (s, 1 F); HRMS (HESI)  $m/z$  calcd for  $\text{C}_{13}\text{H}_{11}\text{N}_4\text{O}_2\text{F}_4$   $[\text{M}+\text{H}]^+$  331.0813, found 331.0811.

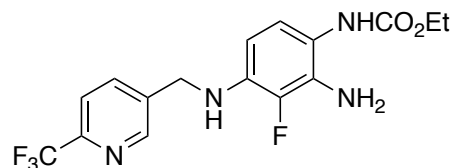

**Ethyl (2-amino-3-fluoro-4-(((6-(trifluoromethyl)pyridin-3-yl)methyl)amino)phenyl)carbamate (RL-24).** A solution of **5m** (0.28 g, 0.85 mmol) in EtOH (4 mL) was charged with 10% Pd/C (0.046 g) under  $\text{N}_2$  and stirred at room temperature for 5 h under an atmosphere of  $\text{H}_2$  (ballon). The reaction mixture was filtered through Celite ( $\text{CH}_2\text{Cl}_2$ ), and concentrated in vacuo to afford a red orange solid (0.235 g, 0.78 mmol, 92%) that was added under argon at  $0^\circ\text{C}$  to a solution of diisopropylethylamine (0.15 mL, 0.86 mmol) in  $\text{CH}_2\text{Cl}_2$  (16 mL). Ethyl chloroformate (0.070 mL, 0.70 mmol) was added dropwise via syringe at  $0^\circ\text{C}$ . The resulting mixture was stirred for 4 h at  $0^\circ\text{C}$ , quenched with water, and extracted with  $\text{CH}_2\text{Cl}_2$  (3 x 10 mL). The combined organic extracts were dried ( $\text{Na}_2\text{SO}_4$ ), concentrated under reduced pressure, and purified by chromatography on  $\text{SiO}_2$  (hexanes/EtOAc, 2:1 to 1:1 to 1:2, containing  $\text{Et}_3\text{N}$  (1%)) to yield a yellow solid (0.190 g, 65%) that was recrystallized ( $\text{CH}_2\text{Cl}_2$ /hexanes) to afford **RL-24** (0.162 g) as a colorless solid: Mp  $149.6\text{--}149.9^\circ\text{C}$ ; IR (ATR) 2962, 3312, 3295, 1676, 1521, 1486, 1474, 1454, 1340, 1137, 1130, 1115, 1087, 779, 719, 714  $\text{cm}^{-1}$ ;  $^1\text{H}$  NMR (500 MHz,  $\text{CDCl}_3$ )  $\delta$  8.71 (s, 1 H), 7.86 (d, 1 H,  $J = 8.0$  Hz), 7.65 (d, 1 H,  $J = 8.0$  Hz), 6.74 (d, 1 H,  $J = 8.5$  Hz), 6.13 (brs, 1 H), 5.96 (t, 1 H,  $J = 8.5$  Hz), 4.48 (d, 2 H,  $J = 6.0$  Hz), 4.35 (brs, 1 H), 4.19 (q, 2 H,  $J = 7.0$  Hz), 3.88 (brs, 2 H), 1.29 (t, 3 H,  $J = 7.0$  Hz);  $^{13}\text{C}$  NMR (100 MHz,  $\text{CDCl}_3$ )  $\delta$  155.4, 149.1, 147.3 (q,  $J = 34.0$  Hz), 141.2 (d,  $J = 231.0$  Hz), 138.4, 136.1, 134.4 (d,  $J = 10.0$  Hz), 131.0, 121.8, 121.7 (q,  $J = 272.0$  Hz), 120.5 (q,  $J = 2.6$  Hz), 115.8, 101.7, 61.7, 45.1, 14.6;  $^{19}\text{F}$  NMR (471 MHz,  $\text{CDCl}_3$ )  $\delta$  -67.8 (s, 3 F), -155.7 (s, 1 F); HRMS (HESI)  $m/z$  calcd for  $\text{C}_{16}\text{H}_{17}\text{N}_4\text{O}_2\text{F}_4$   $[\text{M}+\text{H}]^+$  373.1282, found 373.1276.

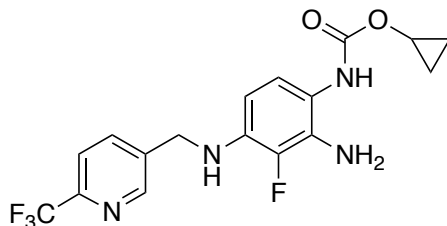

**Cyclopropyl (2-amino-3-fluoro-4-(((6-(trifluoromethyl)pyridin-3-yl)methyl)amino)phenyl)carbamate (RL-67).** A mixture of **5m** (0.200 g, 0.606 mmol) and zinc powder (0.198 g, 3.03 mmol) in MeOH (7 mL) was treated dropwise with 5 M aqueous ammonium chloride solution (0.61 mL, 3.03 mmol), and stirred vigorously at room temperature for 1 h. The reaction mixture was filtered through Celite, and the filtrate was concentrated. The residue was diluted with EtOAc and saturated aqueous NaHCO<sub>3</sub>, and the aqueous layer was extracted with EtOAc (3 x 10 mL), dried (Na<sub>2</sub>SO<sub>4</sub>), filtered, and concentrated in vacuo. The dark red residue was dissolved in dry CH<sub>2</sub>Cl<sub>2</sub> (12 mL) and treated with diisopropylethylamine (0.13 mL, 0.73 mmol) followed by an 0.8 M solution of cyclopropyl chloroformate in toluene (0.76 mL, 0.61 mmol). The reaction mixture was stirred vigorously at room temperature for 4 h, quenched with saturated aqueous NaHCO<sub>3</sub>, and the aqueous layer was extracted with CH<sub>2</sub>Cl<sub>2</sub> (3 x 10 mL). The combined organic extracts were dried (Na<sub>2</sub>SO<sub>4</sub>), concentrated in vacuo, and purified by chromatography on SiO<sub>2</sub> (EtOAc/hexanes, 3:7 to 1:1, containing Et<sub>3</sub>N (1%)) to yield a light yellow solid that was recrystallized (CH<sub>2</sub>Cl<sub>2</sub>/hexanes) to afford **RL-67** (0.064 g, 28%) as a colorless solid: Mp 148-149 °C; IR (ATR) 3345, 1707, 1638, 1527, 1335, 1237, 1134, 1085, 775 cm<sup>-1</sup>; <sup>1</sup>H NMR (600 MHz, acetone-d<sub>6</sub>) δ 8.79 (s, 1 H), 8.05 (d, *J* = 7.8 Hz, 1 H), 7.79 (d, *J* = 7.8 Hz, 1 H), 7.66 (brs, 1 H), 6.73 (s, 1 H), 5.98 (app t, *J* = 8.4 Hz, 1 H), 5.53 (brs, 1 H), 4.59 (d, 2 H), 4.44 (brs, 2 H), 4.10-3.99 (m, 1 H), 0.71-0.52 (m, 4 H); <sup>13</sup>C NMR (151 MHz, acetone-d<sub>6</sub>) δ 156.3, 150.2, 146.9 (q, *J* = 34.1 Hz), 141.7 (d, *J* = 238.5 Hz), 140.9, 137.2, 135.1, 132.4, 122.9 (q, *J* = 272.9 Hz), 122.4, 121.2-121.0 (m), 116.4, 101.2, 49.6, 45.0, 5.3; <sup>19</sup>F NMR (565 MHz, acetone-d<sub>6</sub>) δ -68.1 (s, 3 F), -157.6 (s, 1 F); HRMS (HESI) *m/z* calcd for C<sub>17</sub>H<sub>17</sub>N<sub>4</sub>O<sub>2</sub>F<sub>4</sub> [M+H]<sup>+</sup> 385.1282, found 385.1281.

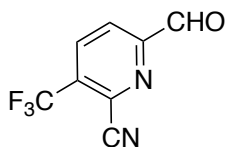

**6-Formyl-3-(trifluoromethyl)picolinonitrile (3h).** A solution of TBAF (0.45 mL, 0.452 mmol) and 6-(((*tert*-butyldimethylsilyl)oxy)methyl)-3-(trifluoromethyl)picolinonitrile (0.13 g, 0.411 mmol) in THF (2 mL) was stirred at room temperature for 1 h, and concentrated under reduced pressure. A solution of the crude residue and SeO<sub>2</sub> (0.050 g, 0.452 mmol) in 1,4-dioxane (1 mL) was heated at 110 °C for 8 h, cooled to room temperature, filtered through Celite, and the Celite was washed (CH<sub>2</sub>Cl<sub>2</sub>). The filtrate was concentrated under reduced pressure and purified by chromatography on SiO<sub>2</sub> (EtOAc/hexanes, 1:10) to afford **3h** (0.031 g, 38%) as light yellow oil: IR (ATR) 1724, 1307, 1141, 1119, 1036, 856, 762 cm<sup>-1</sup>; <sup>1</sup>H NMR (400 MHz, CDCl<sub>3</sub>) δ 10.11 (d, 1 H, *J* = 0.4 Hz), 8.34 (d, 1 H, *J* = 8.0 Hz), 8.27 (d, 1 H, *J* = 8.0 Hz); <sup>13</sup>C NMR (100 MHz, CDCl<sub>3</sub>) δ 190.1, 155.0, 136.6 (q, *J* = 4.0 Hz), 133.6 (q, *J* = 34.0 Hz), 132.0, 123.9, 121.4 (q, *J* = 273.0 Hz), 113.5; <sup>19</sup>F NMR (376 MHz, CDCl<sub>3</sub>) δ -62.1 (s); HRMS (HESI) *m/z* calcd for C<sub>8</sub>H<sub>4</sub>N<sub>2</sub>OF<sub>3</sub> [M+H]<sup>+</sup> 201.0270, found 201.0270.

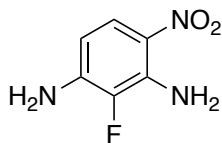

**2-Fluoro-4-nitrobenzene-1,3-diamine (4f).** A microwave vial containing a solution of 2,3-difluoro-6-nitroaniline (1.00 g, 5.74 mmol) in 1,4-dioxane (5 mL) was treated with 28% aqueous ammonium hydroxide solution (4.00 mL, 28.97 mmol). The vial was sealed and heated at 95 °C for 19 h. The solvent was removed in vacuo, and the residue was diluted with EtOAc, dried (Na<sub>2</sub>SO<sub>4</sub>), filtered, concentrated in vacuo, and purified by chromatography on SiO<sub>2</sub> (acetone/hexanes, 1:3 to 1:2, containing Et<sub>3</sub>N (1%)) to afford **4f** (0.85 g, 89%) as a yellow solid: Mp 174-175.5 °C; IR (ATR) 3341, 1631, 1537, 1474, 1411, 1280, 1210, 758 cm<sup>-1</sup>; <sup>1</sup>H NMR (400 MHz, CD<sub>3</sub>OD) δ 7.71 (dd, 1 H, *J* = 9.6, 1.6 Hz), 6.13 (dd, 1 H, *J* = 9.6, 8.4 Hz); <sup>13</sup>C NMR (100 MHz, CD<sub>3</sub>OD) δ 143.5 (d, *J* = 10.0 Hz), 138.3 (d, *J* = 13.0 Hz), 138.3 (d, *J* = 226.0 Hz), 124.8, 123.9 (d, *J* = 2.0 Hz), 105.9 (d, *J* = 4.0 Hz); <sup>19</sup>F NMR (471 MHz, CDCl<sub>3</sub>) δ -159.2; HRMS (HESI) *m/z* calcd for C<sub>6</sub>H<sub>7</sub>N<sub>3</sub>O<sub>2</sub>F [M+H]<sup>+</sup> 172.0517, found 172.0516.

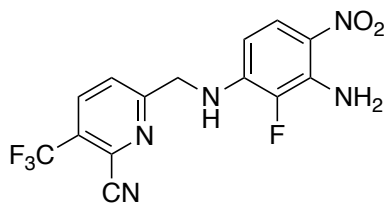

**6-(((3-Amino-2-fluoro-4-nitrophenyl)amino)methyl)-3-**

**(trifluoromethyl)picolinonitrile (5n).** A mixture of **3h** (0.20 g, 1.00 mmol), **4f** (0.171 g, 1.00 mmol), TsOH (0.017 g, 0.10 mmol) and 4 Å molecular sieves (200 mg) in dry xylene (1 mL) was heated at reflux for 1 h, cooled to room temperature, quenched with MeOH (0.5 mL) and treated with NaBH<sub>4</sub> (0.045 g, 1.20 mmol). The reaction mixture was stirred for 30 minutes, filtered, concentrated in vacuo, and the residue was purified by chromatography on SiO<sub>2</sub> (EtOAc/hexanes, 1:4 to 1:1) to afford **5n** (0.11 g, 31%) as a yellow solid: Mp 195-196.5 °C; IR (ATR) 3359, 1636, 1280, 1131, 1039, 834, 757 cm<sup>-1</sup>; <sup>1</sup>H NMR (400 MHz, acetone-d<sub>6</sub>) δ 8.44 (d, 1 H, *J* = 8.4 Hz), 8.04 (d, 1 H, *J* = 8.4 Hz), 7.79 (d, 1 H, *J* = 9.6, 1.6 Hz), 6.75 (brs, 3 H), 6.22 (d, 1 H, *J* = 9.6, 8.4 Hz), 4.91 (d, 2 H, *J* = 6.0 Hz); <sup>13</sup>C NMR (100 MHz, acetone-d<sub>6</sub>) δ 165.6, 141.8 (d, *J* = 10.0 Hz), 138.7 (d, *J* = 228.0 Hz), 137.0 (q, *J* = 4.0 Hz), 136.7 (d, *J* = 13.0 Hz), 131.0 (q, *J* = 2.0 Hz), 129.2 (q, *J* = 33.0 Hz), 126.0, 125.8, 123.8 (d, *J* = 3.0 Hz), 123.3 (q, *J* = 271.0 Hz), 115.3, 101.5 (d, *J* = 3.0 Hz), 48.2; <sup>19</sup>F NMR (471 MHz, acetone-d<sub>6</sub>) δ -62.3 (s, 3 F), -160.3 (s, 1 F); HRMS (HESI) *m/z* calcd for C<sub>14</sub>H<sub>10</sub>N<sub>5</sub>O<sub>2</sub>F<sub>4</sub> [M+H]<sup>+</sup> 356.0765, found 356.0764.

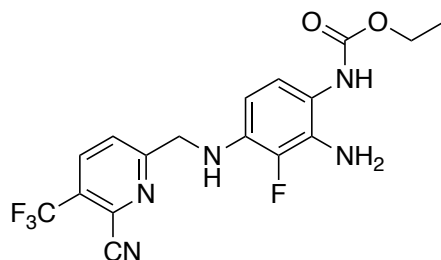

**Ethyl (2-amino-4-(((6-cyano-5-(trifluoromethyl)pyridin-2-yl)methyl)amino)-3-fluorophenyl)carbamate (RL-23).** A solution of **5n** (0.10 g, 0.28 mmol) in MeOH (2 mL) was treated with zinc powder (0.092 g, 1.41 mmol) followed by 5 M aqueous ammonium chloride solution (0.28 mL). The reaction mixture was stirred vigorously at room temperature for 40 min, treated with diisopropylethylamine (0.49 mL, 2.81 mmol) followed

by ethyl chloroformate (0.13 mL, 1.41 mmol), stirred vigorously at room temperature for 2 h, and filtered through Celite. The filter cake was washed with EtOAc, and the filtrate was diluted with EtOAc and saturated aqueous NaHCO<sub>3</sub>. The aqueous layer was extracted with EtOAc (3 x 5 mL), and the combined organic extracts were dried (Na<sub>2</sub>SO<sub>4</sub>), concentrated under reduced pressure, and purified by chromatography on SiO<sub>2</sub> (EtOAc/hexanes, 2:3 to 3:2, containing Et<sub>3</sub>N (1%)) to afford **RL-23** (0.048 g, 43%) as a light yellow solid: Mp 153-154 °C; IR (ATR) 3367, 1690, 1527, 1308, 1227, 1143, 1124, 1038, 770 cm<sup>-1</sup>; <sup>1</sup>H NMR (500 MHz, CDCl<sub>3</sub>) δ 8.03 (d, 1 H, *J* = 8.5 Hz), 7.71 (d, 1 H, *J* = 8.0 Hz), 6.72 (d, 1 H, *J* = 8.5 Hz), 6.19 (brs, 1 H), 5.87 (t, 1 H, *J* = 8.8 Hz), 4.59 (s, 2 H), 4.19 (q, 2 H, *J* = 7.0 Hz), 3.98 (brs, 3 H), 1.28 (t, 3 H, *J* = 7.0 Hz); <sup>13</sup>C NMR (100 MHz, CDCl<sub>3</sub>) δ 164.9, 155.5, 141.3 (d, *J* = 230.0 Hz), 135.4 (q, *J* = 5.0 Hz), 134.0 (d, *J* = 10.0 Hz), 131.2 (d, *J* = 12.0 Hz), 130.8 (d, *J* = 2.0 Hz), 129.1 (q, *J* = 34.0 Hz), 124.3, 122.0 (q, *J* = 272.0 Hz), 121.9, 116.0, 114.3, 101.6, 61.8, 48.8, 14.7; <sup>19</sup>F NMR (471 MHz, CDCl<sub>3</sub>) δ -61.7 (s, 3 F), -155.5 (s, 1 F); HRMS (HESI) *m/z* calcd for C<sub>17</sub>H<sub>16</sub>N<sub>5</sub>O<sub>2</sub>F<sub>4</sub> [M+H]<sup>+</sup> 398.1235, found 398.1231.

## Metabolic Stability Properties of Selected Analogs in Liver Microsomes

| Compound ID | Species | <i>In vitro</i> T <sub>1/2</sub> (min) | <i>In vitro</i> Cl <sub>int</sub> (μL/min/mg protein) | Scale-up Cl <sub>int</sub> (mL/min/kg) |
|-------------|---------|----------------------------------------|-------------------------------------------------------|----------------------------------------|
| Verapamil   | Human   | 16.36                                  | 84.74                                                 | 106.28                                 |
|             | Mouse   | 7.82                                   | 177.30                                                | 780.12                                 |
| RG          | Human   | 970.06                                 | 1.43                                                  | 1.79                                   |
|             | Mouse   | 273.86                                 | 5.06                                                  | 22.27                                  |
| RL-02       | Human   | 270.26                                 | 5.13                                                  | 6.43                                   |
|             | Mouse   | 50.96                                  | 27.20                                                 | 119.66                                 |
| RL-12       | Human   | 312.16                                 | 4.44                                                  | 5.57                                   |
|             | Mouse   | 108.37                                 | 12.79                                                 | 56.28                                  |
| RL-18       | Human   | 210.91                                 | 6.57                                                  | 8.24                                   |
|             | Mouse   | 98.01                                  | 14.14                                                 | 62.22                                  |
| RL-24       | Human   | 405.65                                 | 3.42                                                  | 4.29                                   |
|             | Mouse   | 275.65                                 | 5.03                                                  | 22.12                                  |
| RL-32       | Human   | 451.33                                 | 3.07                                                  | 3.85                                   |
|             | Mouse   | 292.77                                 | 4.73                                                  | 20.83                                  |
| RL-36       | Human   | 76.41                                  | 18.14                                                 | 22.75                                  |
|             | Mouse   | 19.05                                  | 72.76                                                 | 320.14                                 |
| RL-56       | Human   | 127.65                                 | 10.86                                                 | 13.62                                  |
|             | Mouse   | 83.69                                  | 16.56                                                 | 72.87                                  |
| RL-73       | Human   | 349.50                                 | 3.97                                                  | 4.97                                   |
|             | Mouse   | 49.65                                  | 27.92                                                 | 122.83                                 |
| RL-81       | Human   | 344.48                                 | 4.02                                                  | 5.05                                   |
|             | Mouse   | 187.02                                 | 7.41                                                  | 32.61                                  |

| Table 2. Metabolic Stability of Test Compounds in Pooled Human and Male Mouse Liver Microsomes |         |                                           |                          |        |        |        |        |
|------------------------------------------------------------------------------------------------|---------|-------------------------------------------|--------------------------|--------|--------|--------|--------|
| Compound ID                                                                                    | Species | Assay Format                              | Remaining Percentage (%) |        |        |        |        |
|                                                                                                |         |                                           | 0 min                    | 15 min | 30 min | 45 min | 60 min |
| Verapamil                                                                                      | Human   | With NADPH                                | 100.00                   | 38.60  | 17.34  | 11.41  | 7.66   |
|                                                                                                |         | Without NADPH                             | 100.00                   | 103.90 | 101.98 | 106.44 | 105.73 |
|                                                                                                | Mouse   | With NADPH                                | 100.00                   | 13.63  | 4.18   | 1.76   | 0.93   |
|                                                                                                |         | Without NADPH                             | 100.00                   | 94.69  | 90.79  | 95.87  | 91.23  |
| RG                                                                                             | Human   | With NADPH                                | 100.00                   | 101.32 | 99.67  | 99.11  | 95.84  |
|                                                                                                |         | Without NADPH                             | 100.00                   | 102.76 | 98.95  | 97.46  | 95.71  |
|                                                                                                | Mouse   | With NADPH                                | 100.00                   | 96.17  | 82.57  | 82.00  | 89.57  |
|                                                                                                |         | Without NADPH                             | 100.00                   | 98.83  | 103.43 | 95.02  | 101.05 |
| RL-02                                                                                          | Human   | With NADPH                                | 100.00                   | 105.56 | 93.93  | 90.05  | 89.33  |
|                                                                                                |         | Without NADPH                             | 100.00                   | 100.24 | 94.95  | 102.41 | 99.29  |
|                                                                                                | Mouse   | With NADPH                                | 100.00                   | 83.57  | 67.72  | 55.94  | 44.08  |
|                                                                                                |         | Without NADPH                             | 100.00                   | 91.07  | 81.53  | 72.80  | 68.39  |
| RL-12                                                                                          | Human   | Heat-inactivated microsomes without NADPH | 100.00                   | 110.71 | 100.02 | 98.98  | 100.40 |
|                                                                                                |         | With NADPH                                | 100.00                   | 104.29 | 95.46  | 94.46  | 88.96  |
|                                                                                                | Mouse   | Without NADPH                             | 100.00                   | 98.09  | 93.08  | 92.79  | 91.29  |
|                                                                                                |         | With NADPH                                | 100.00                   | 90.71  | 82.28  | 75.60  | 67.81  |
| RL-18                                                                                          | Human   | Without NADPH                             | 100.00                   | 101.45 | 99.47  | 89.92  | 92.79  |
|                                                                                                |         | With NADPH                                | 100.00                   | 98.78  | 89.02  | 89.50  | 82.11  |
|                                                                                                | Mouse   | Without NADPH                             | 100.00                   | 94.21  | 87.44  | 84.60  | 84.82  |
|                                                                                                |         | With NADPH                                | 100.00                   | 88.68  | 83.49  | 73.06  | 64.83  |
| RL-24                                                                                          | Human   | Without NADPH                             | 100.00                   | 94.12  | 91.32  | 86.67  | 83.30  |
|                                                                                                |         | With NADPH                                | 100.00                   | 95.27  | 92.42  | 92.93  | 89.08  |
|                                                                                                | Mouse   | Without NADPH                             | 100.00                   | 85.65  | 95.02  | 96.18  | 94.72  |
|                                                                                                |         | With NADPH                                | 100.00                   | 97.99  | 89.91  | 84.83  | 89.01  |
| RL-32                                                                                          | Human   | Without NADPH                             | 100.00                   | 100.37 | 100.07 | 100.46 | 105.64 |
|                                                                                                |         | With NADPH                                | 100.00                   | 101.95 | 95.23  | 97.27  | 91.24  |
|                                                                                                | Mouse   | Without NADPH                             | 100.00                   | 101.69 | 109.34 | 96.61  | 105.09 |
|                                                                                                |         | With NADPH                                | 100.00                   | 102.98 | 96.08  | 91.09  | 89.03  |
| RL-36                                                                                          | Human   | Without NADPH                             | 100.00                   | 109.93 | 107.09 | 97.78  | 103.18 |
|                                                                                                |         | With NADPH                                | 100.00                   | 89.48  | 78.65  | 67.46  | 58.33  |
|                                                                                                | Mouse   | Without NADPH                             | 100.00                   | 85.28  | 77.70  | 75.44  | 69.25  |
|                                                                                                |         | Heat-inactivated microsomes without NADPH | 100.00                   | 95.60  | 102.34 | 94.75  | 91.75  |
| RL-56                                                                                          | Human   | With NADPH                                | 100.00                   | 53.18  | 29.85  | 17.99  | 11.23  |
|                                                                                                |         | Without NADPH                             | 100.00                   | 103.45 | 94.87  | 90.81  | 83.01  |
|                                                                                                | Mouse   | Without NADPH                             | 100.00                   | 95.66  | 82.58  | 77.59  | 73.90  |
|                                                                                                |         | With NADPH                                | 100.00                   | 98.57  | 88.71  | 87.12  | 86.61  |
| RL-73                                                                                          | Human   | Without NADPH                             | 100.00                   | 89.53  | 79.20  | 69.43  | 61.02  |
|                                                                                                |         | With NADPH                                | 100.00                   | 99.47  | 89.90  | 89.61  | 80.20  |
|                                                                                                | Mouse   | Without NADPH                             | 100.00                   | 98.58  | 96.08  | 96.83  | 86.96  |
|                                                                                                |         | Heat-inactivated microsomes without NADPH | 100.00                   | 95.40  | 98.26  | 94.08  | 96.51  |
| RL-81                                                                                          | Human   | Without NADPH                             | 100.00                   | 83.55  | 65.70  | 54.72  | 43.38  |
|                                                                                                |         | With NADPH                                | 100.00                   | 87.38  | 75.33  | 65.69  | 53.37  |
|                                                                                                | Mouse   | Without NADPH                             | 100.00                   | 103.99 | 106.78 | 116.82 | 95.01  |
|                                                                                                |         | With NADPH                                | 100.00                   | 96.86  | 91.85  | 88.26  | 90.09  |
| RL-81                                                                                          | Human   | Without NADPH                             | 100.00                   | 99.04  | 96.48  | 94.79  | 92.86  |
|                                                                                                |         | With NADPH                                | 100.00                   | 93.27  | 89.30  | 83.30  | 80.14  |
|                                                                                                | Mouse   | Without NADPH                             | 100.00                   | 104.80 | 98.59  | 93.88  | 98.46  |
|                                                                                                |         | With NADPH                                | 100.00                   | 96.86  | 91.85  | 88.26  | 90.09  |

## Lilly OIDD Screening Materials and Methods

HEK293 cells expressing heteromeric human Kv7.2/3 and Kv7.3/5 channel were obtained from ChanTest Corp./Charles River Laboratories (Cat #s CT6147 and CT6018, respectively). In these cell lines, expression of Kv7.3 is constitutive, whereas expression of Kv7.2 or Kv7.5 is inducible by exposure to tetracycline/doxycycline.

HEK293 cells stably expressing homomeric human Kv7.4 and heteromeric human Kv7.4/5 channels were generated at Lilly Research Laboratories, using the Jump-In™ T-REx™ platform from Invitrogen (Carlsbad, CA).

Unless otherwise specified, all cell culture reagents were obtained from ThermoFischer Scientific (Waltham, MA), and all other reagents were obtained from Sigma-Aldrich (St Louis, MO).

### Kv7 Automated Electrophysiology (IonWorks Barracuda) assay

#### Assay Protocol:

- Starting with a 85-95% confluent T-150 flask of HEK293 cells expressing homomeric or heteromeric Kv7 channel, cells are dissociated using 3 mL Trypsin (0.25%) for 8 min at 37 °C, 5% CO<sub>2</sub>.
- Cells are re-suspended in External Buffer at 2.5-3.6M cells/mL and placed in the IonWorks Barracuda™ (IWB, Molecular Devices, Sunnyvale, CA) instrument.
- External Buffer, Intracellular Buffer and cells are placed into the PatchPlate by the instrument.
- Whole cell recording configuration is achieved by perforation of a patch of cell membrane with 0.1 g/L amphotericin.
- Cells are voltage clamped at -80 mV on IWB and current is measured in response to 1 s voltage steps ranging from -80 mV to +40 mV.
- Test compound is added at final concentrations of 10 μM to 0.5 nM in External Buffer and equilibrated for 6 min.
- Current measurements are repeated in the presence of the test compound.
-



Buffers:

- External Buffer: (in mM): NaCl 140, KCl 5, CaCl<sub>2</sub> 2, MgCl<sub>2</sub> 1.1, HEPES 10, glucose 10, pH 7.4 using NaOH.
- Intracellular Buffer: 90 KGluconate, 40 KCl, 3.2 MgCl<sub>2</sub>, 3.2 EGTA and 5 HEPES; pH 7.25 using KOH.

Data Analysis:

Currents (I) are converted to conductance (G) by the following formula:  $G=I/(V-E_K)$ , using -84 mV as the reversal potential for potassium ( $E_K$ ). Conductance values after compound addition are normalized to the pre-compound max conductance (conductance at +40 mV) for the same well. Conductance-voltage (G-V) curves are generated and fit to the Boltzmann equation.

Measure parameters are:

- Conc@2xG(.15): Compound concentration that doubles the conductance at a voltage corresponding to 15% channel activation under control conditions.
- Delta V0.5: Difference in the mid-point of the G-V curve between 10  $\mu$ M test compound and DMSO control.
- DeltaG@maxconc: Difference in the conductance at +40 mV between 10  $\mu$ M test compound and DMSO control.
- Max obs DeltaG: Largest fold difference in the conductance at +40 mV between any concentration of test compound and DMSO control.

## Dihedral Angle Analysis of RL-50 and RL-46

A dihedral angle analysis for **RL-50** and **RL-46** was performed in Spartan 18, Built 1.3.0 (Wavefunction Inc. Irvine, CA) and relative energies (kcal/mol) were plotted as a function of the benzylamine dihedral angle C(2)-N(9)-C(11)-C(12).

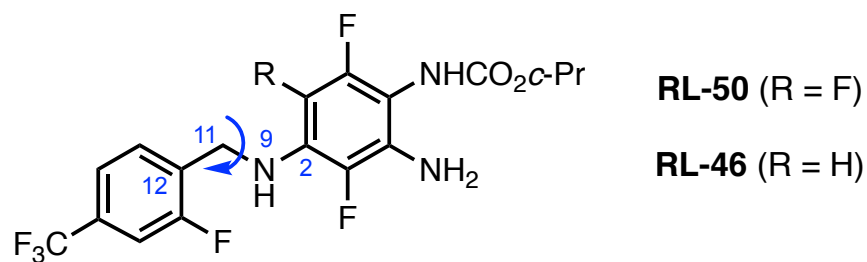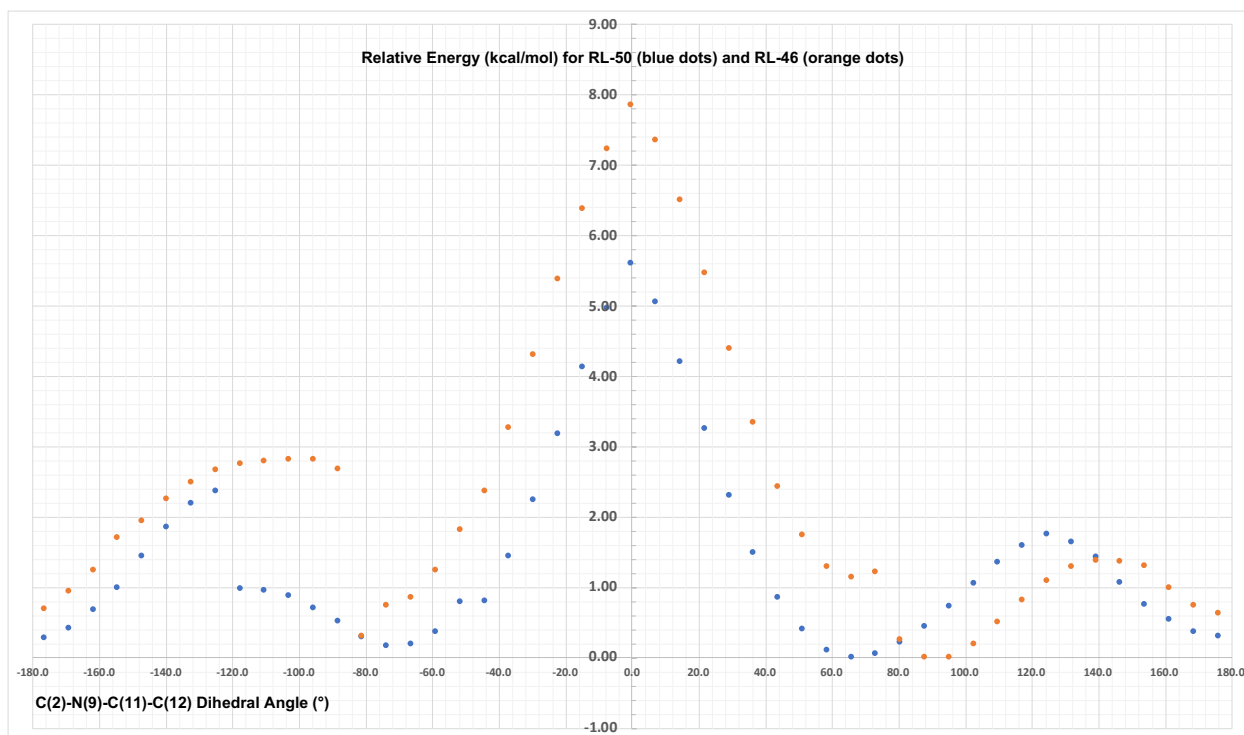



RL740.013 CDC13 500MHz

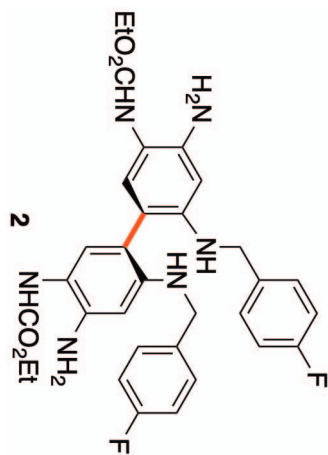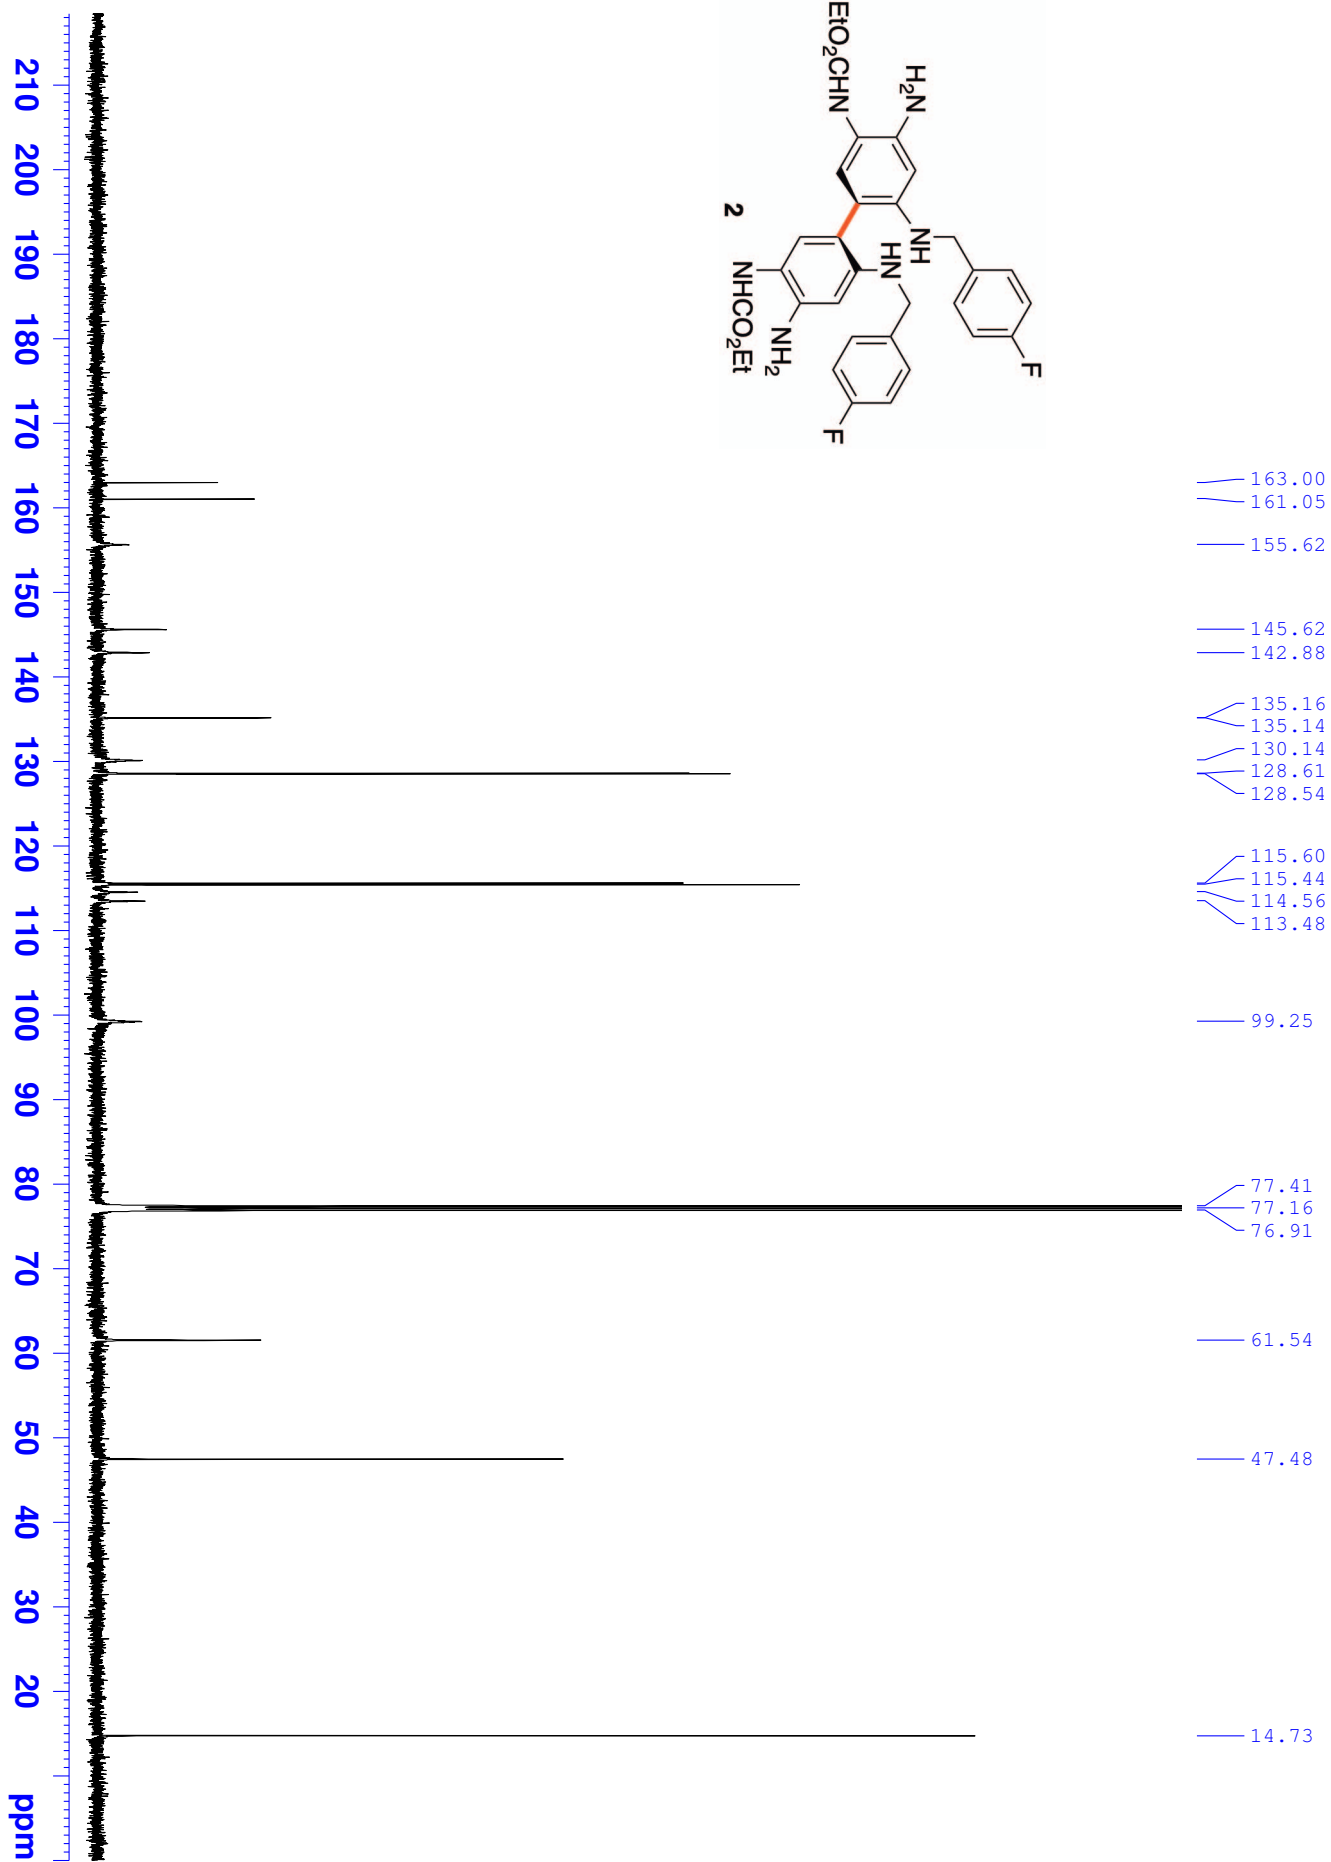

RL648.071 CDCl3 500MHz

CDCl3

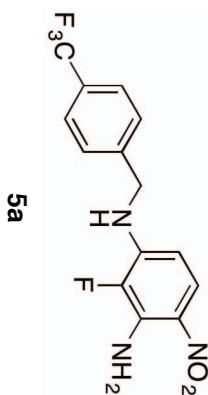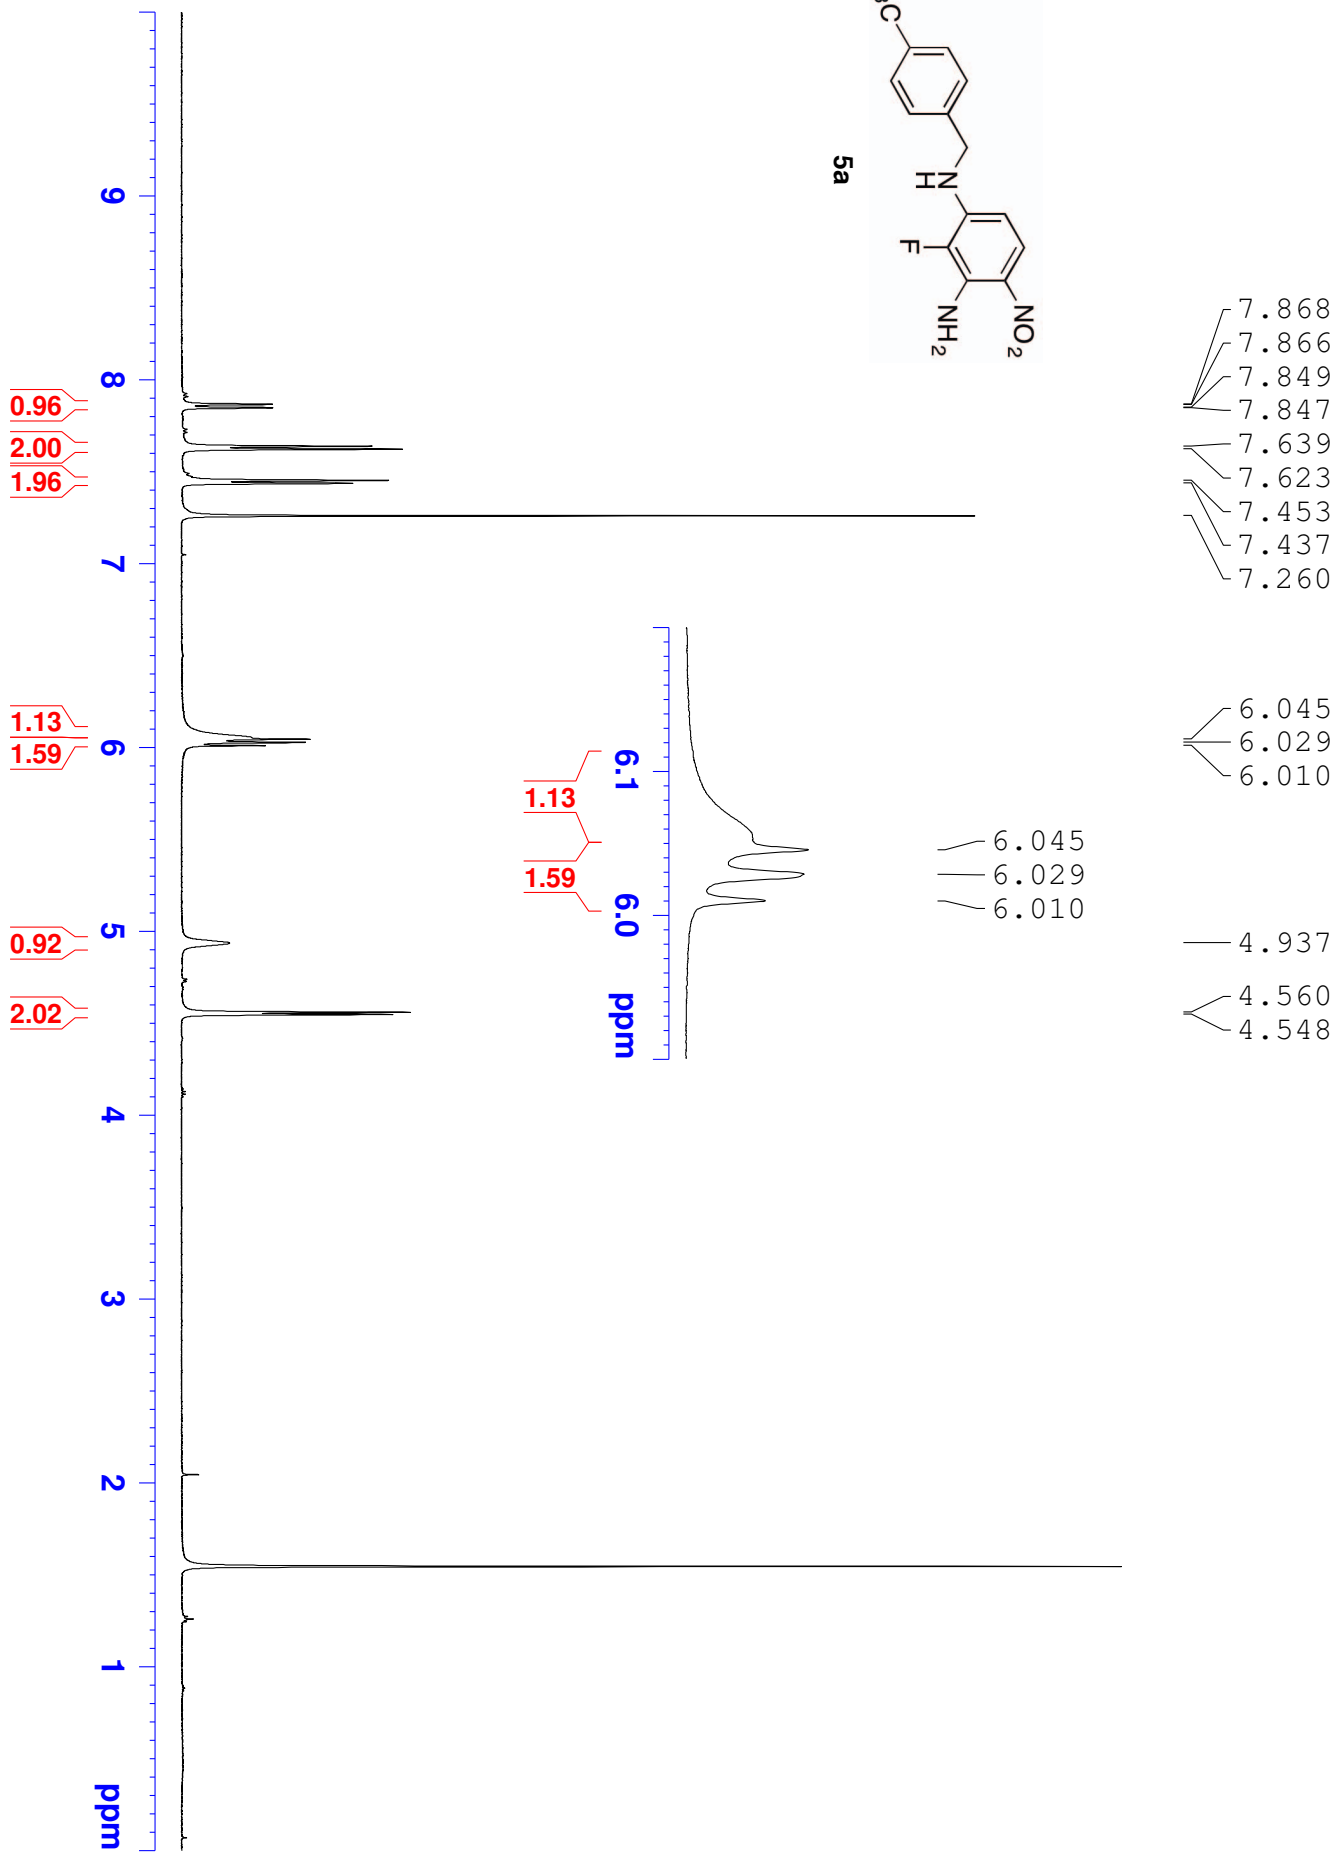

RL648.071 Acetone-d6 400b

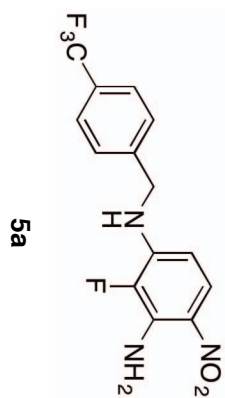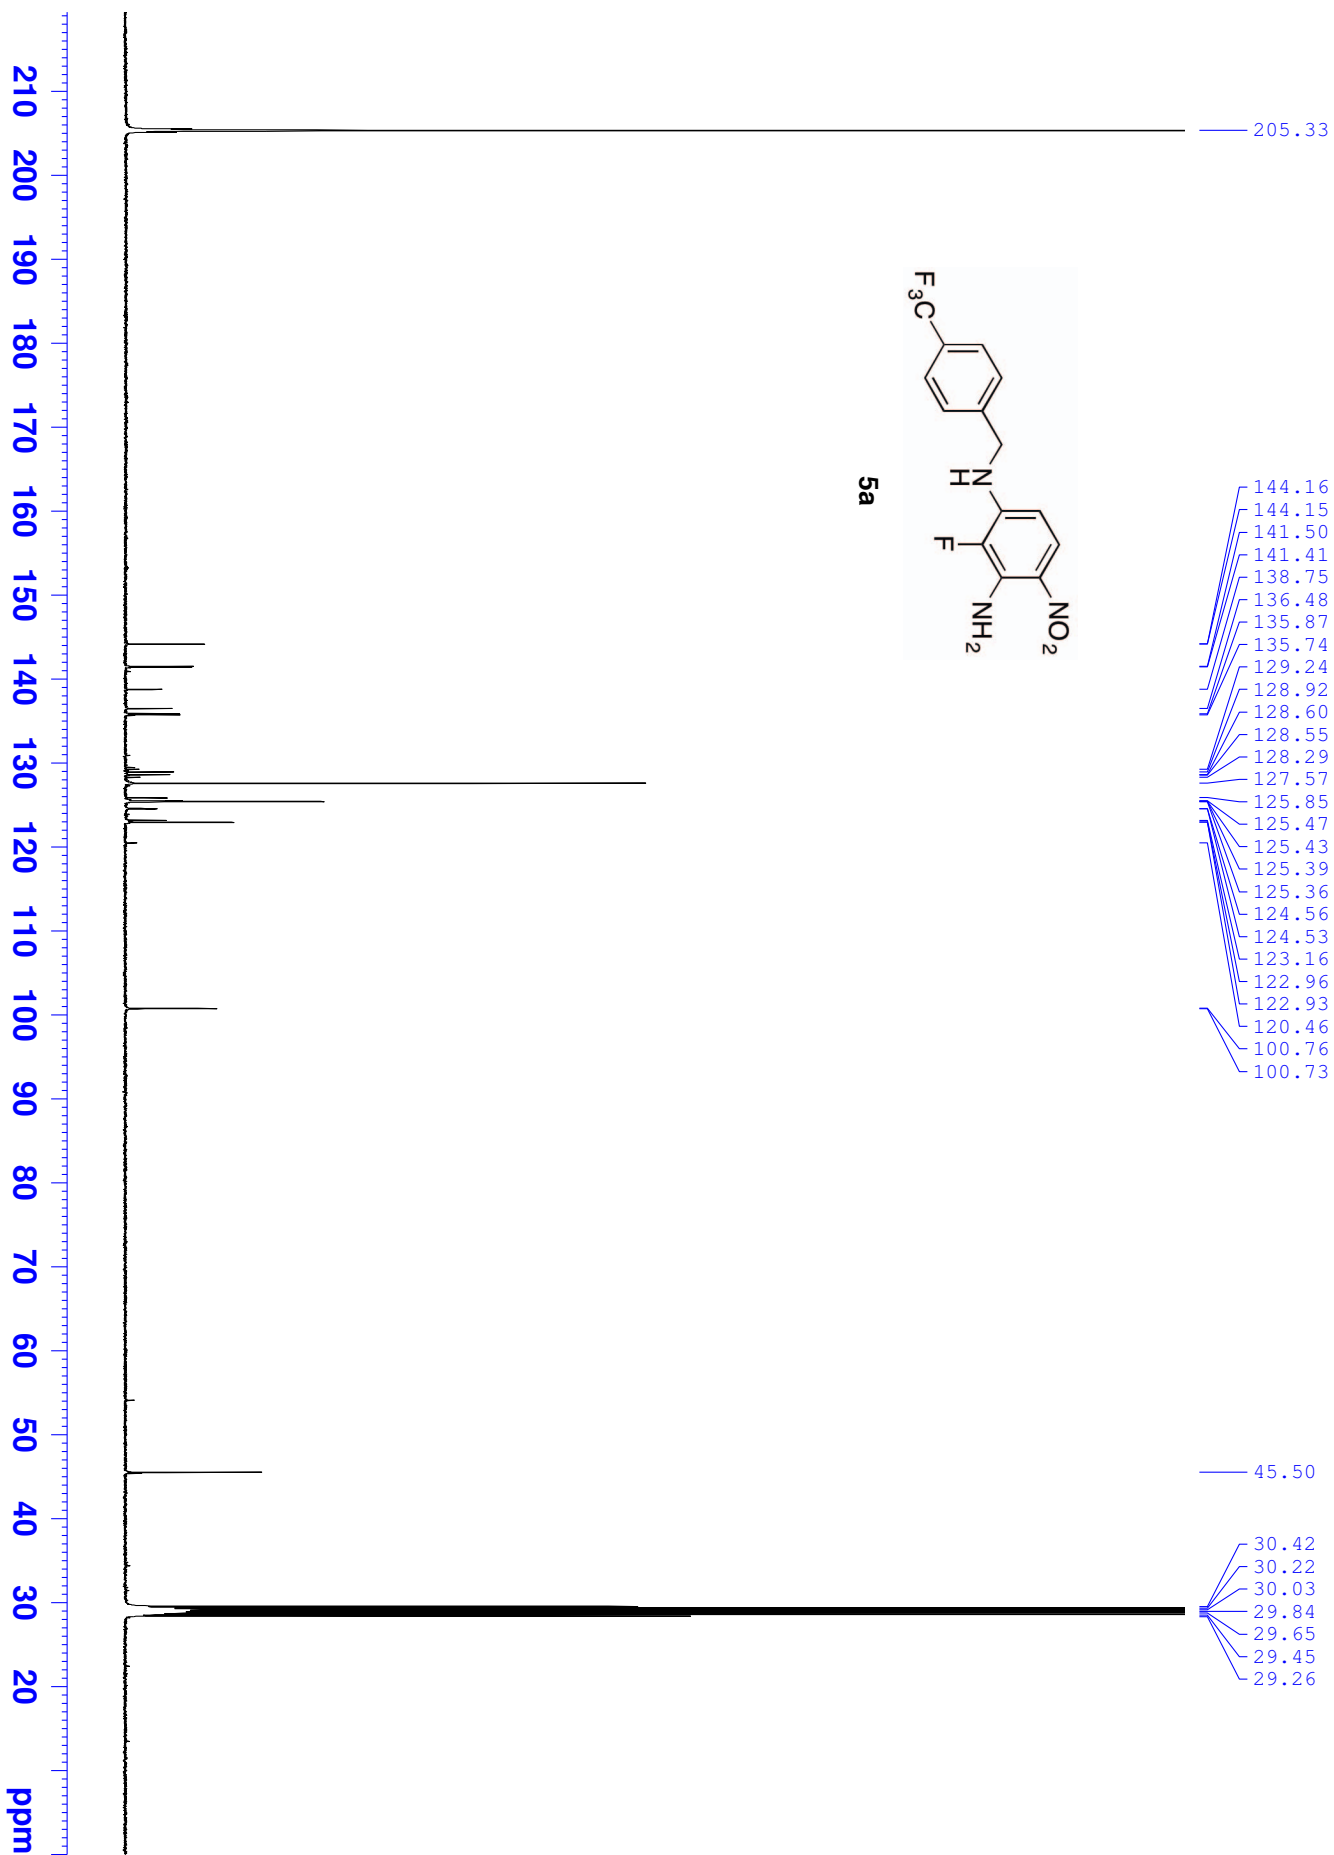

RL648.081 CDC13 400a

CDC13

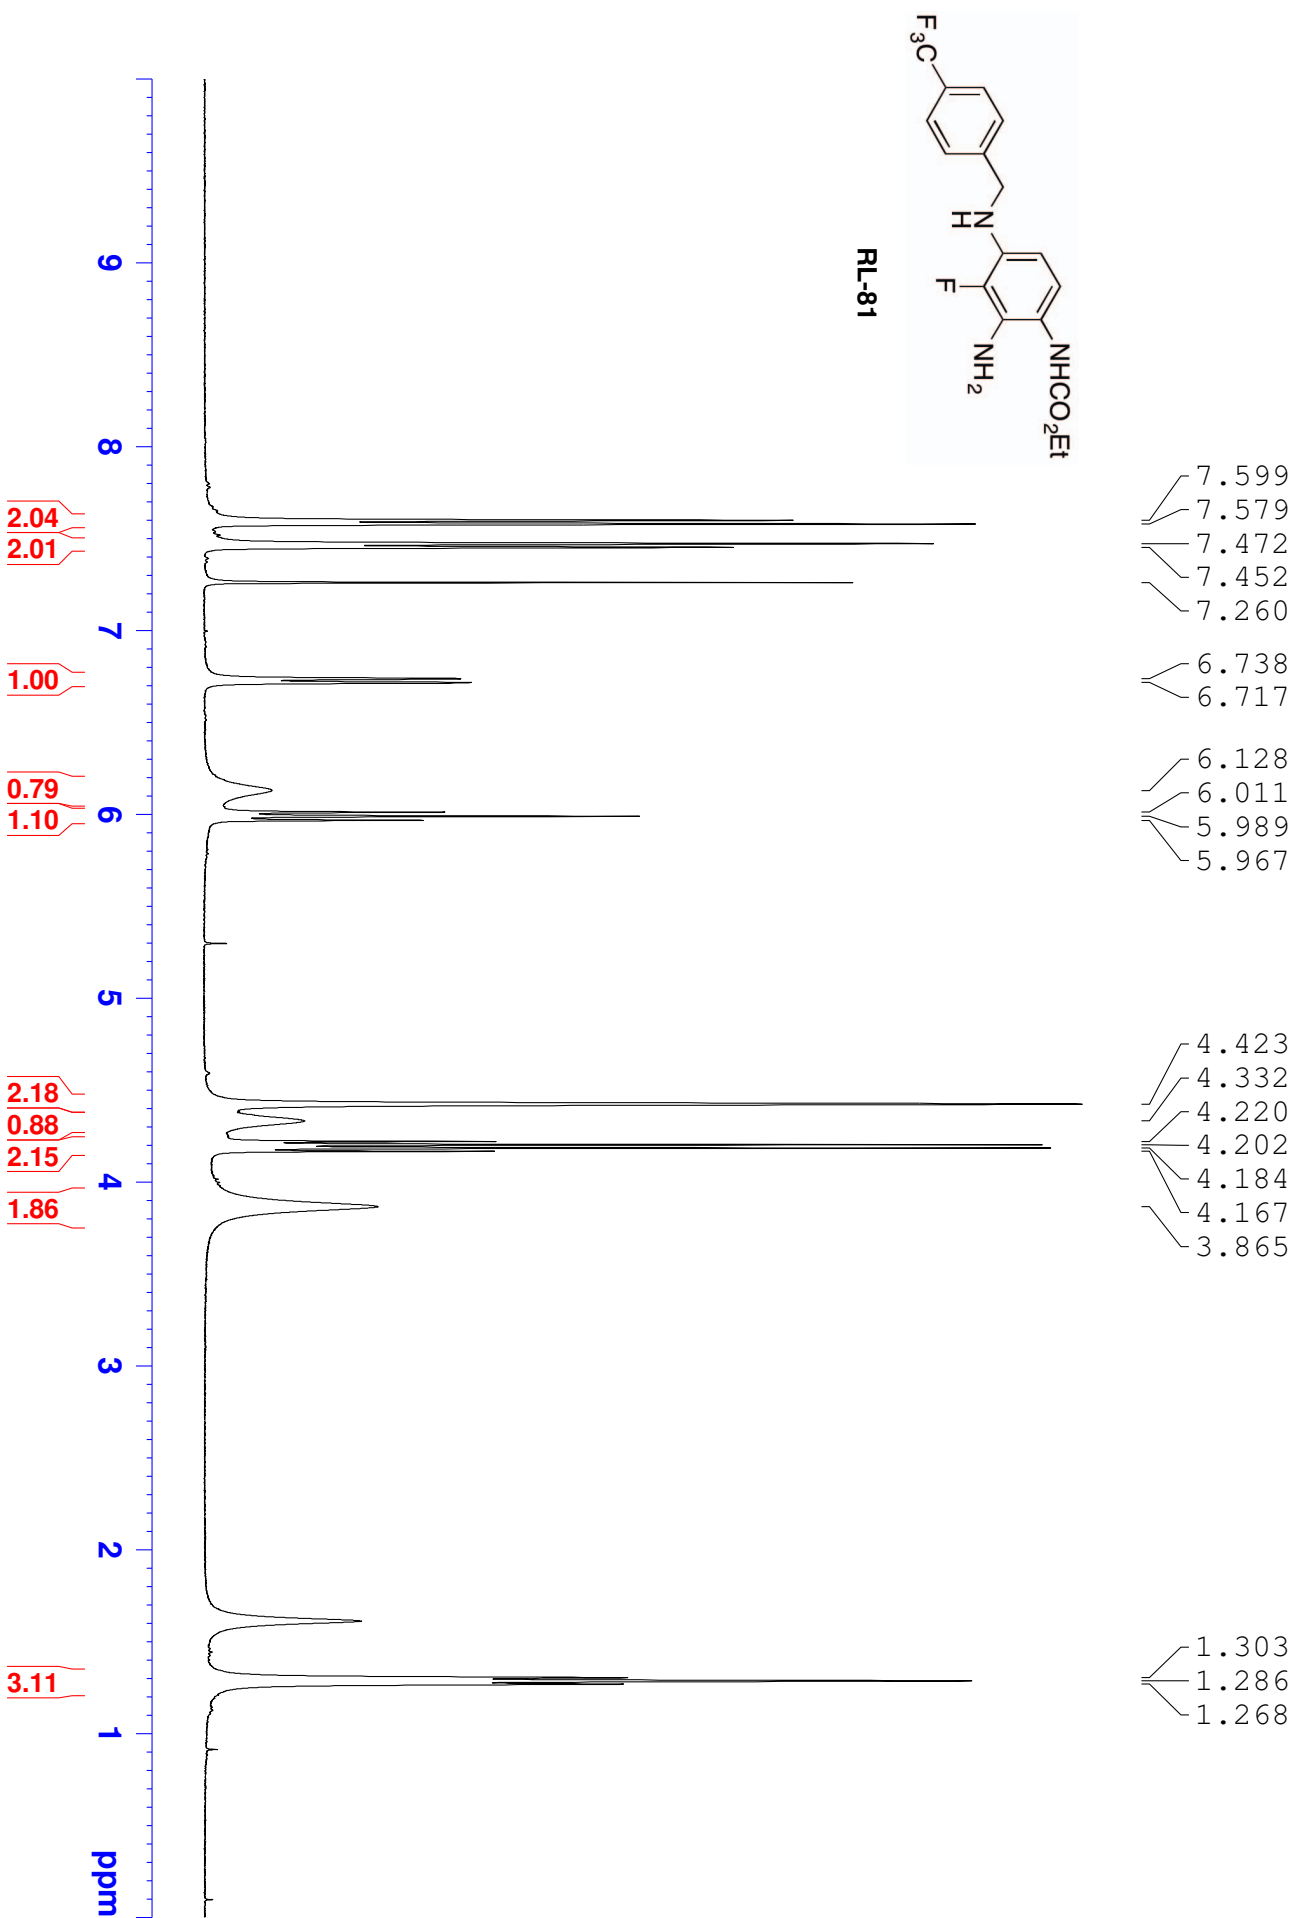

RL648.081 Acetone-d6 400a

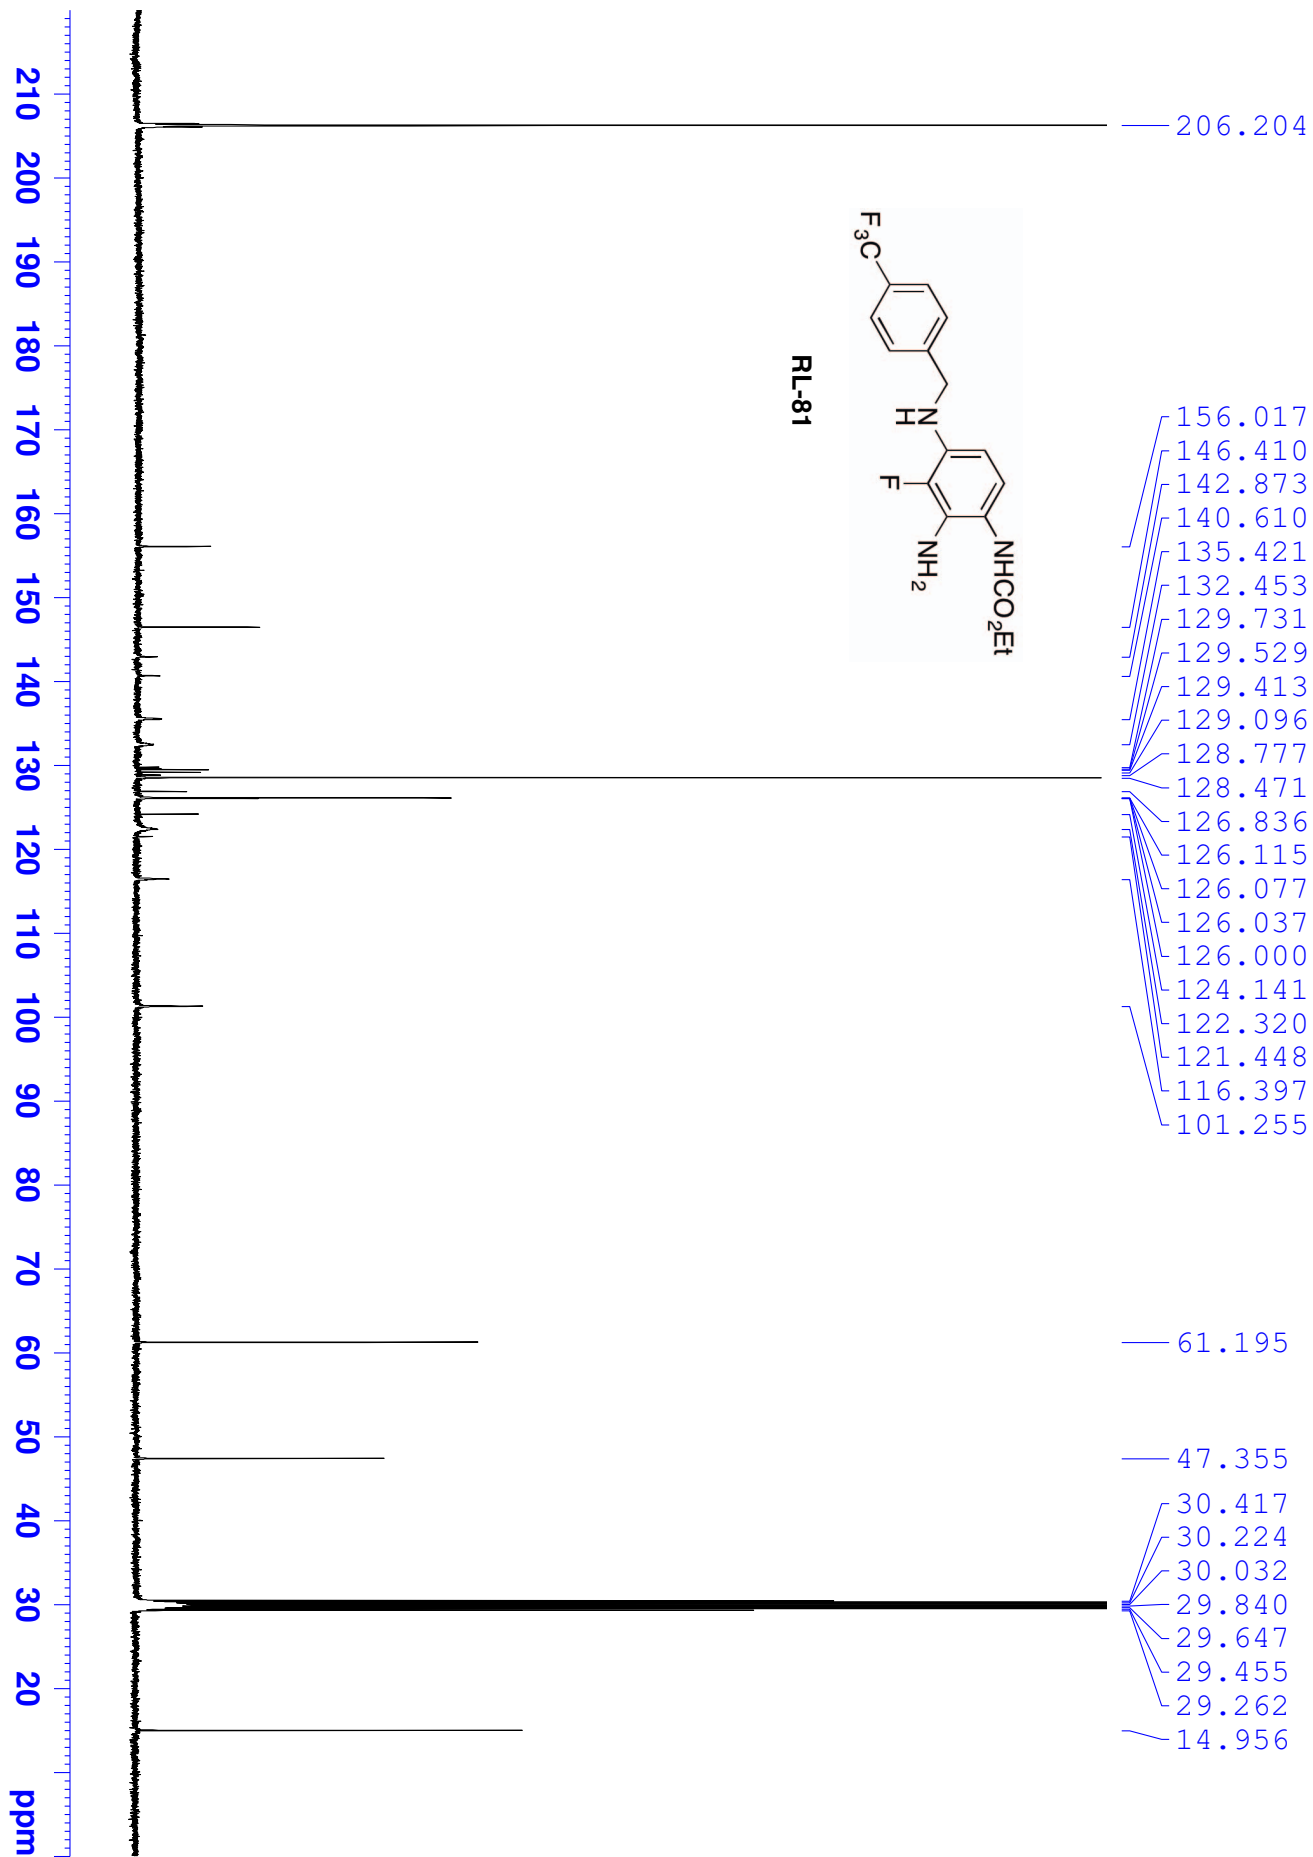



CDCl3

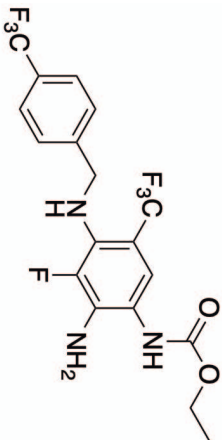

RL-073

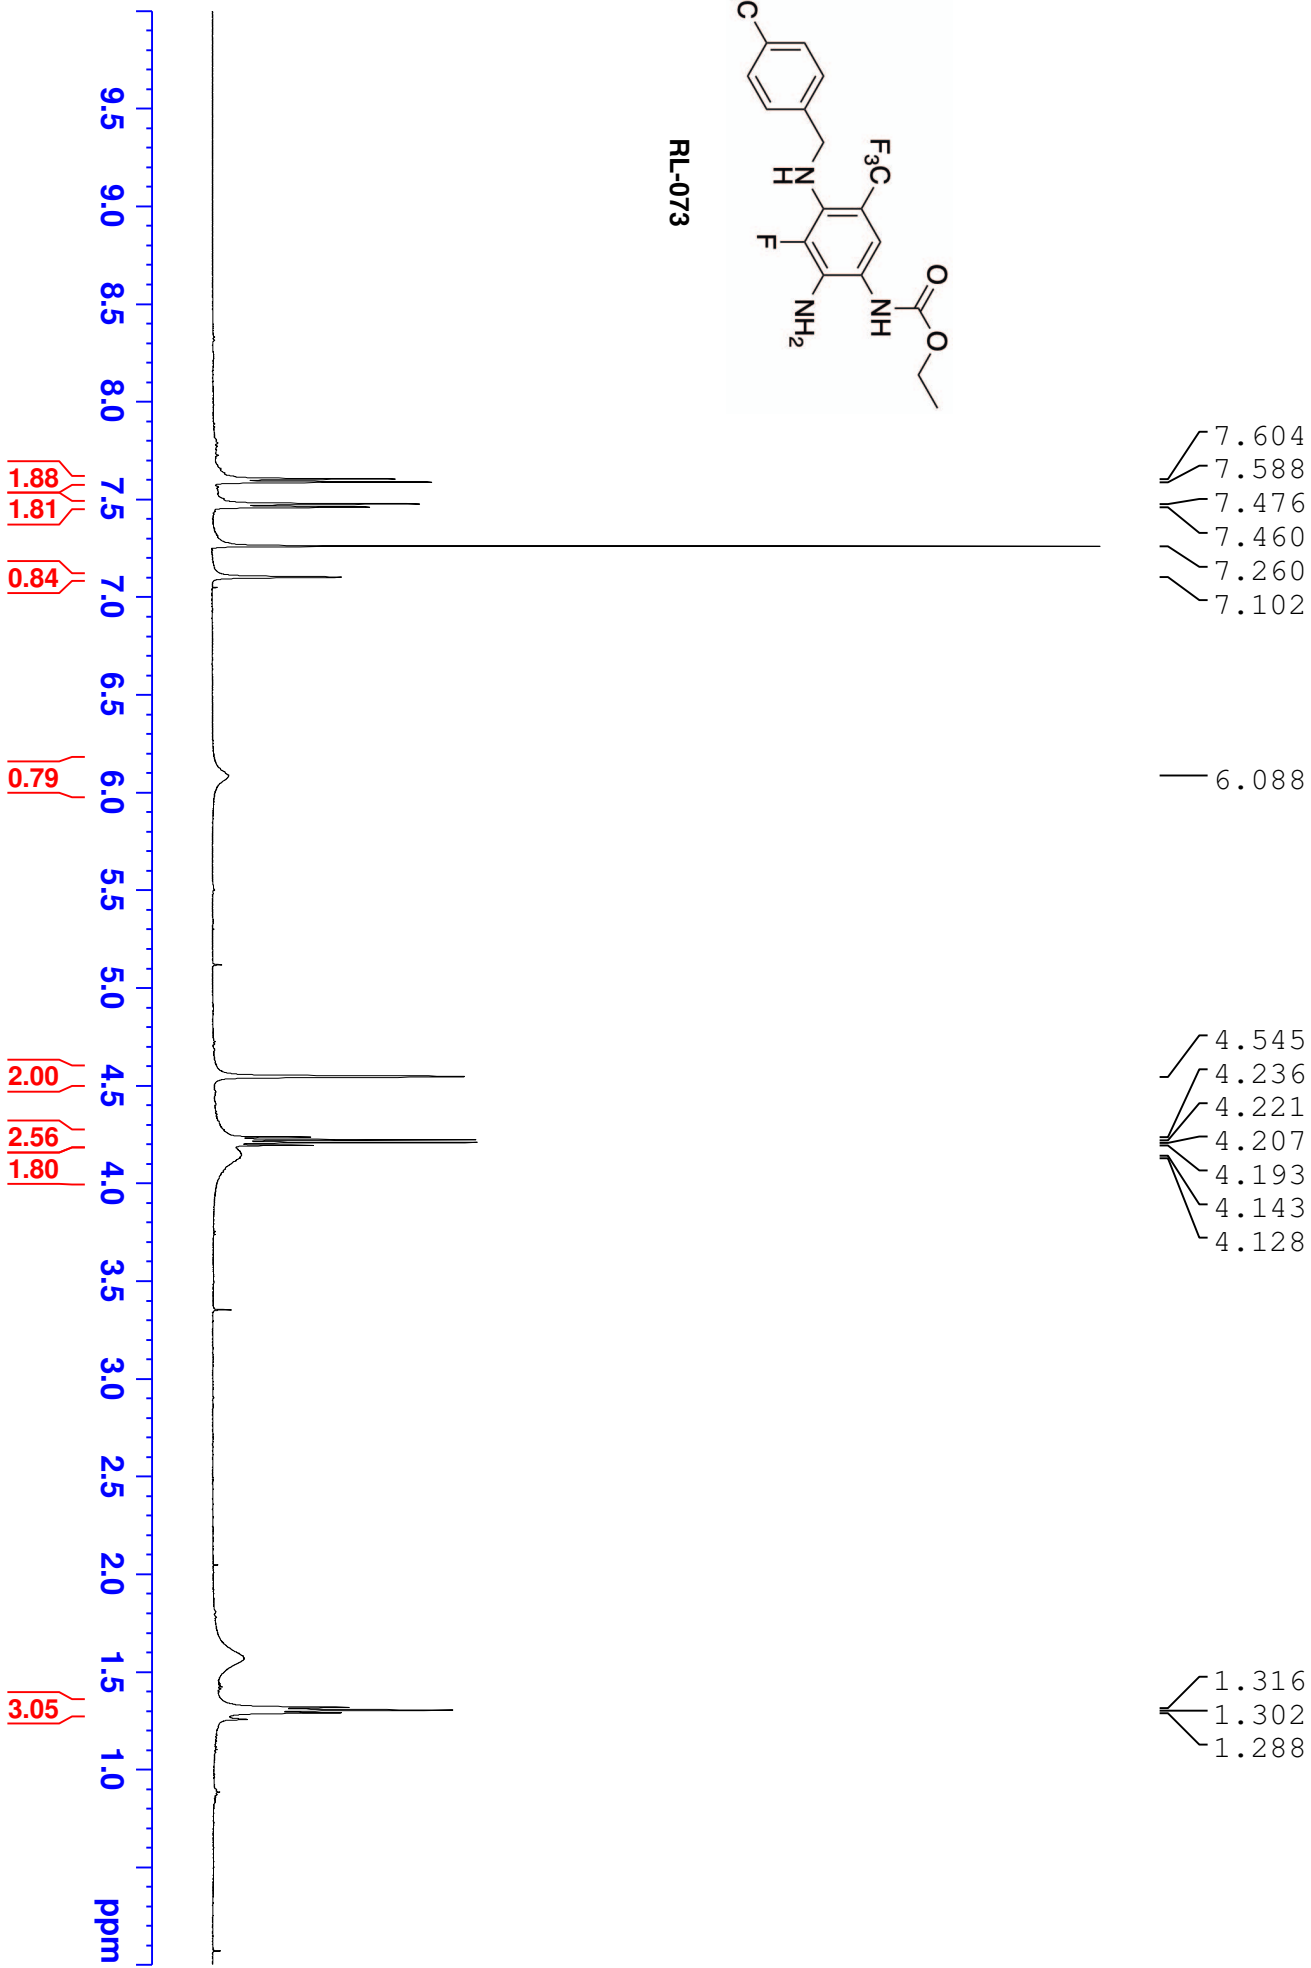

RL740.073 CDCl3 600MHz

155.37  
143.77  
143.56  
142.02  
135.78  
133.17  
133.11  
130.01  
129.79  
129.58  
129.37  
127.82  
127.41  
127.38  
126.98  
125.66  
125.64  
125.62  
125.59  
125.18  
123.82  
123.79  
123.38  
122.02  
121.58  
119.99  
107.65  
107.48

CDC13

77.37  
77.16  
76.95

62.02

50.87  
50.80

14.52

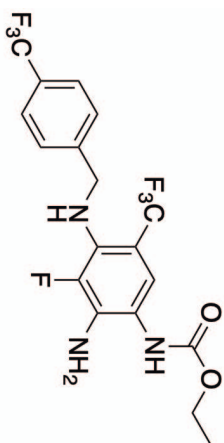

RL-073

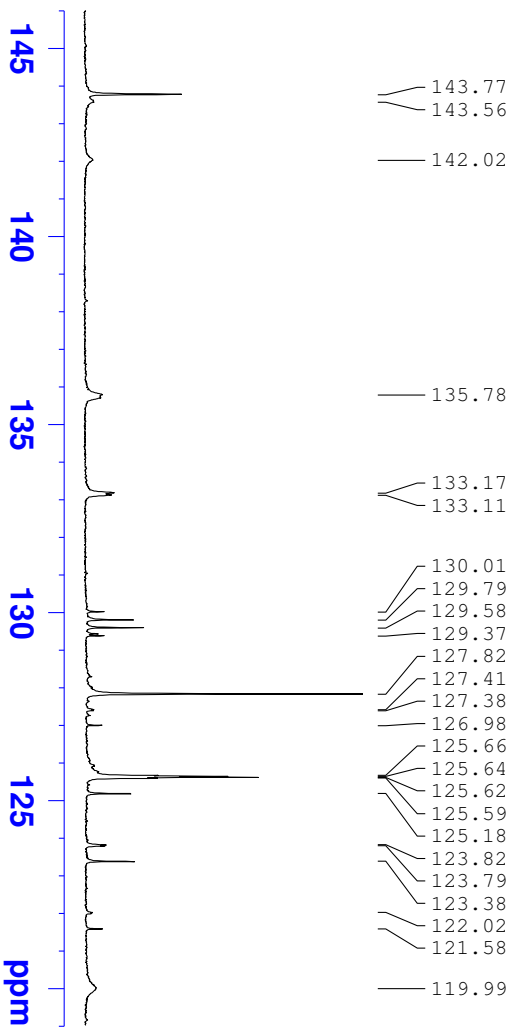

210 200 190 180 170 160 150 140 130 120 110 100 90 80 70 60 50 40 30 20 ppm

RL702.032 CDCl3 400b

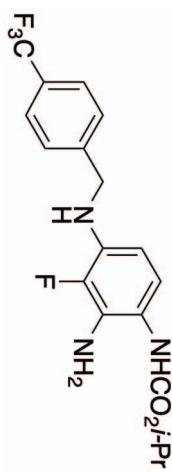

RL-32

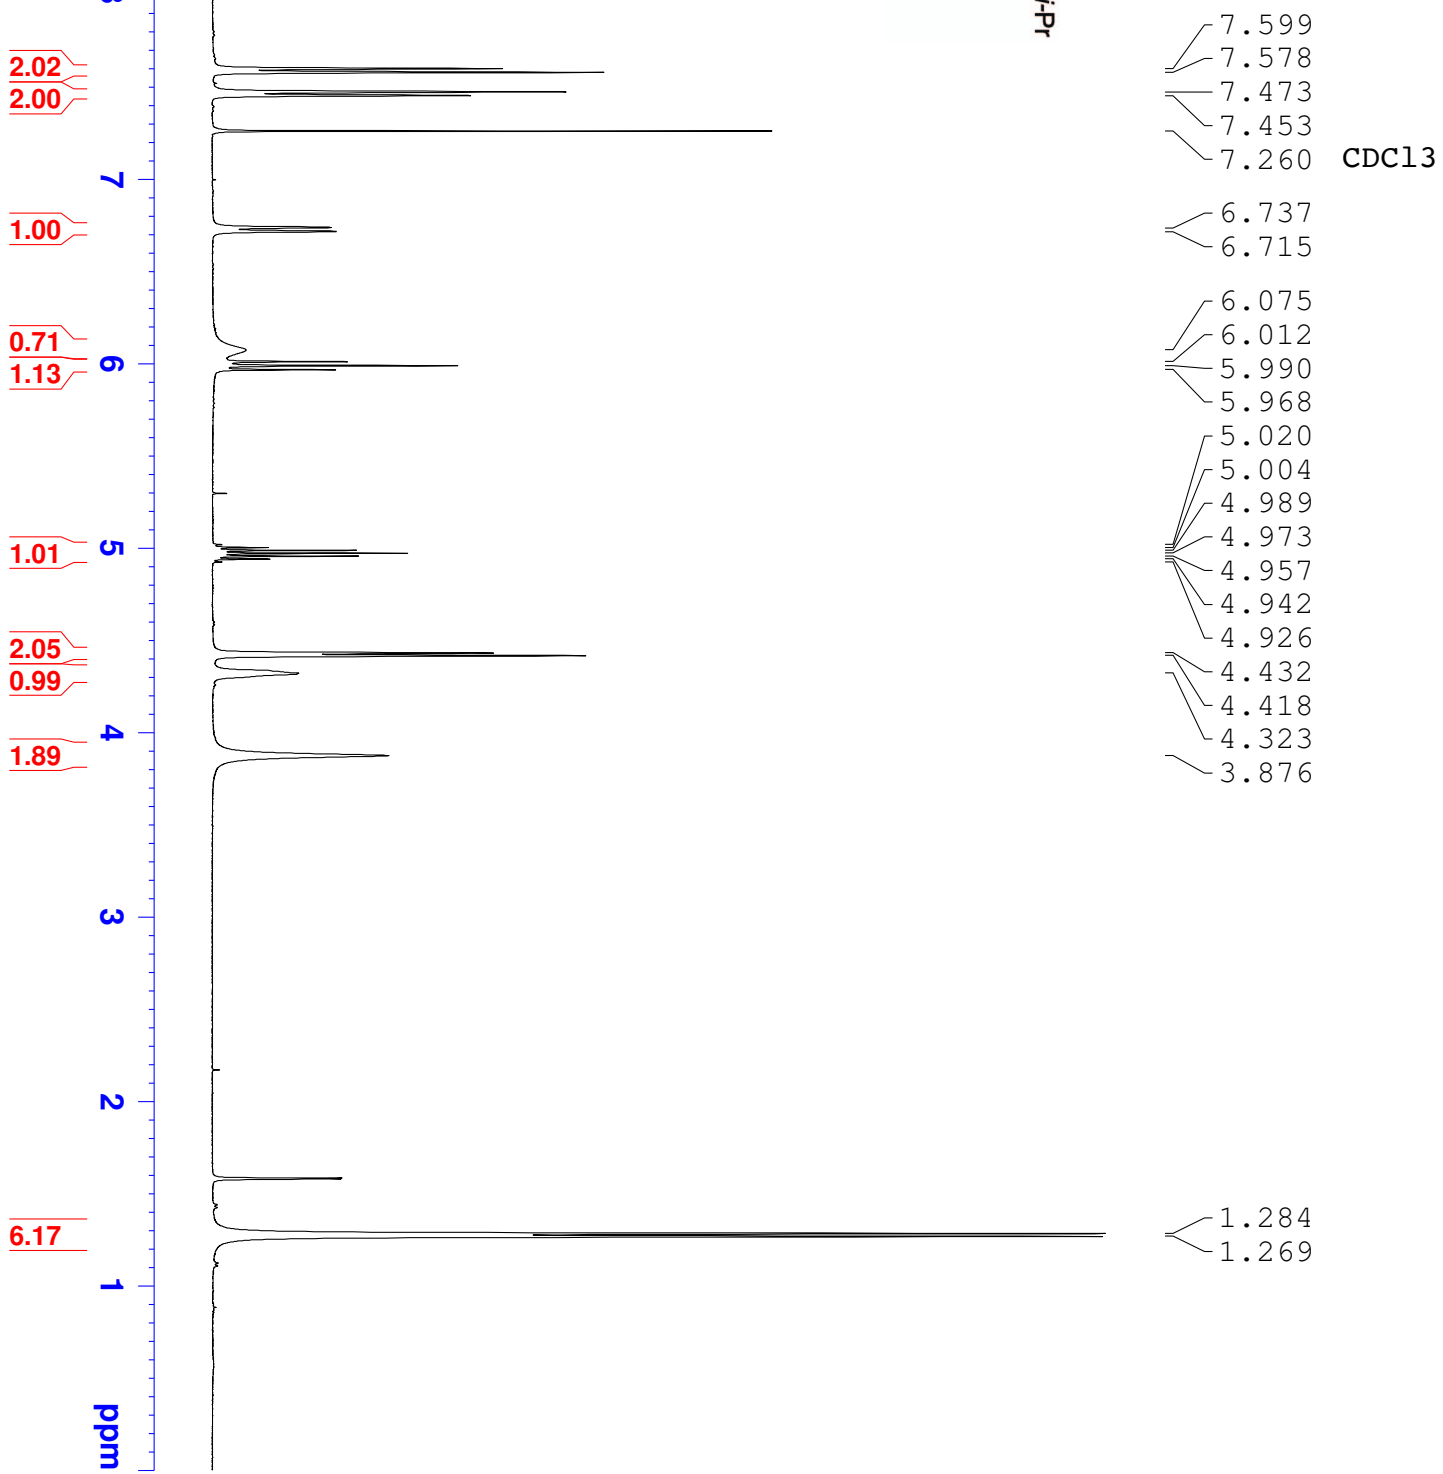

RL702.032 CDC13 400b

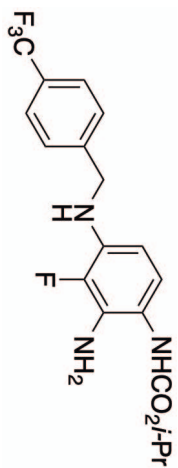

RL-32

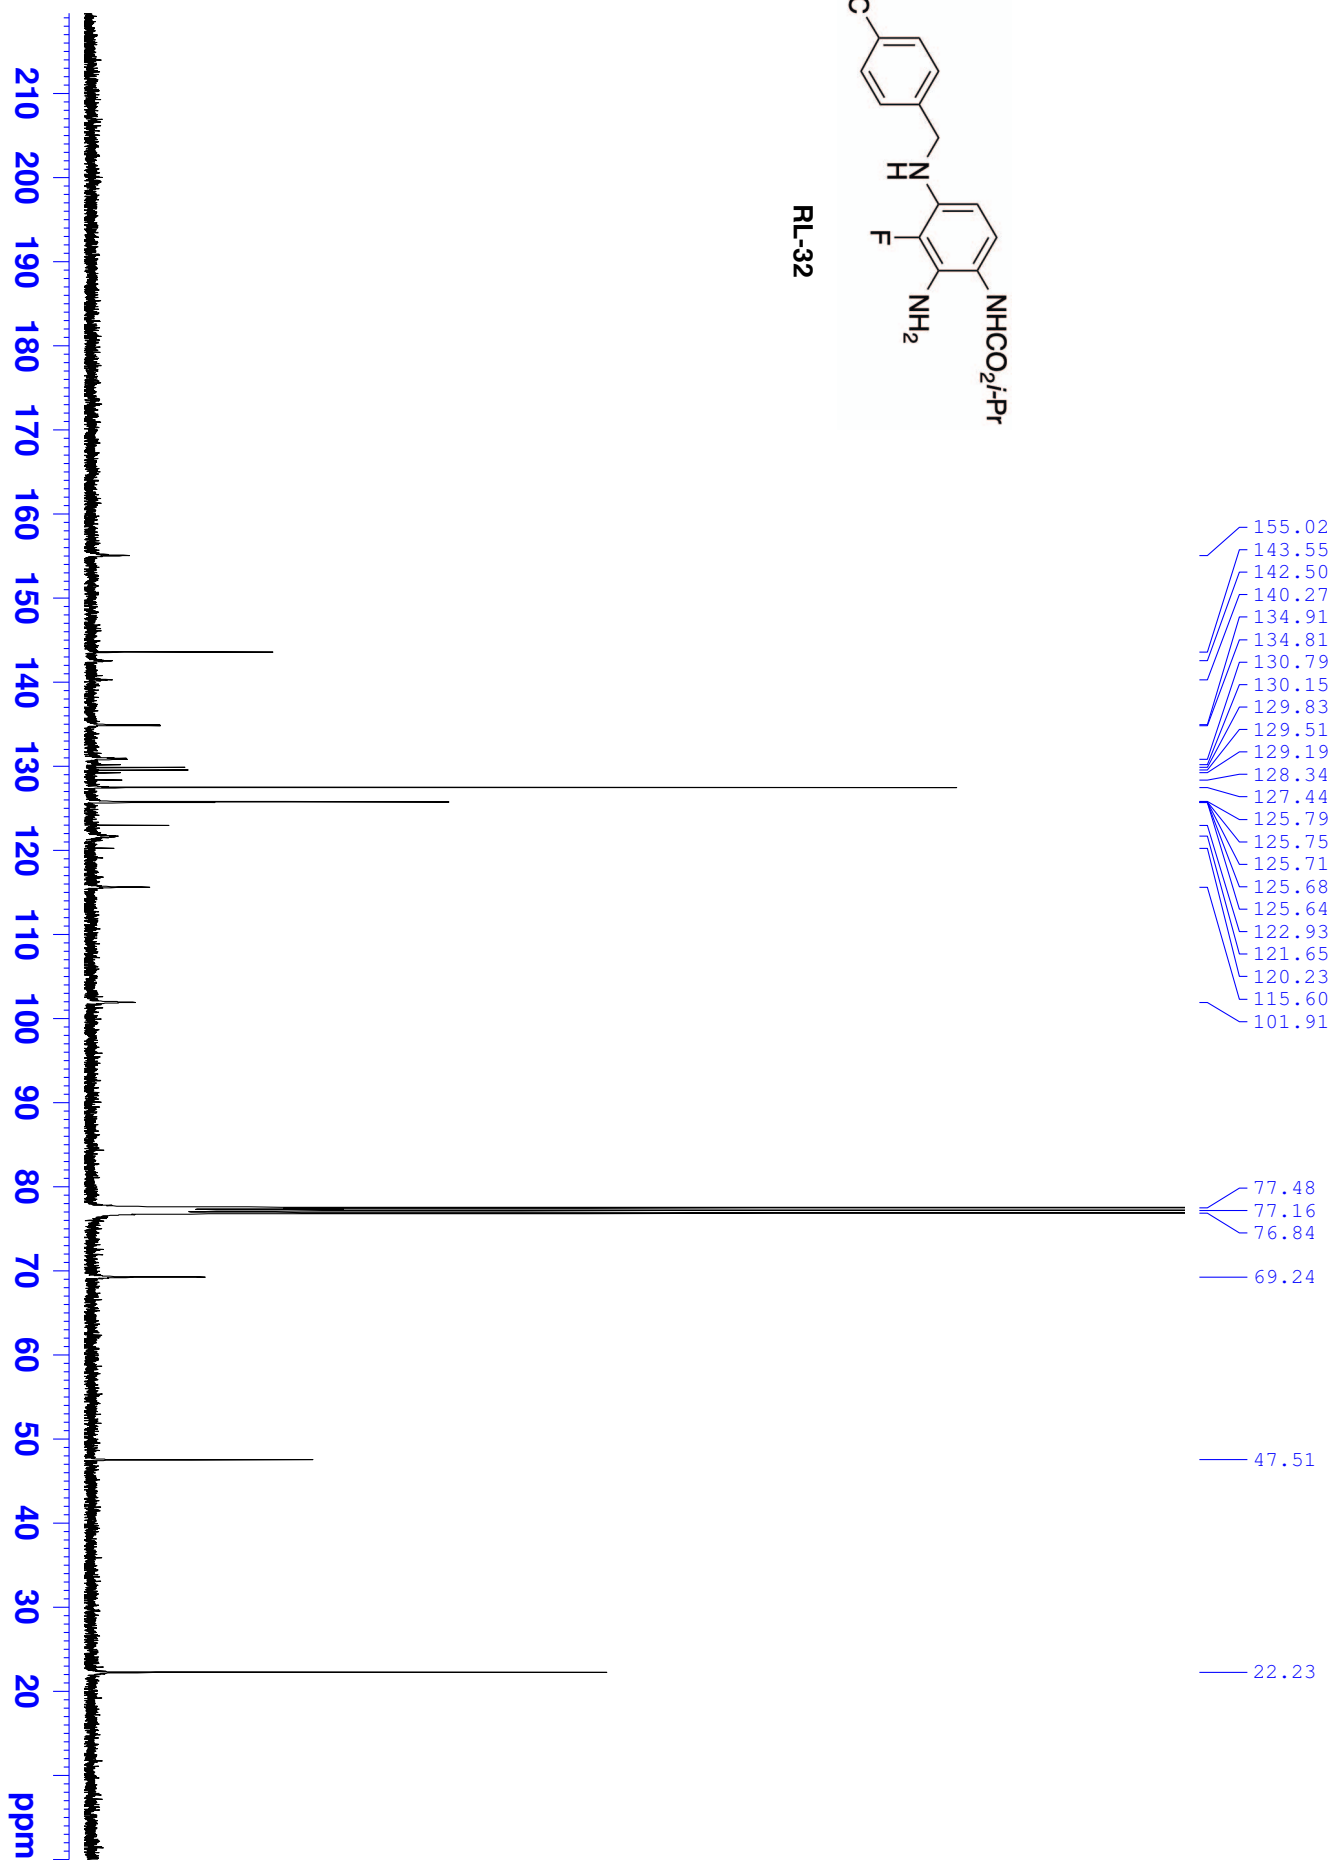

RL702.056 CDCl3 400a

CDCl3

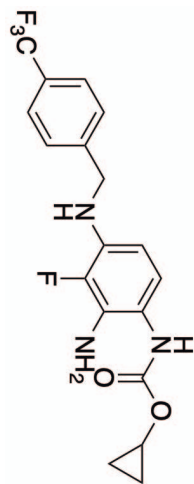

RL-56

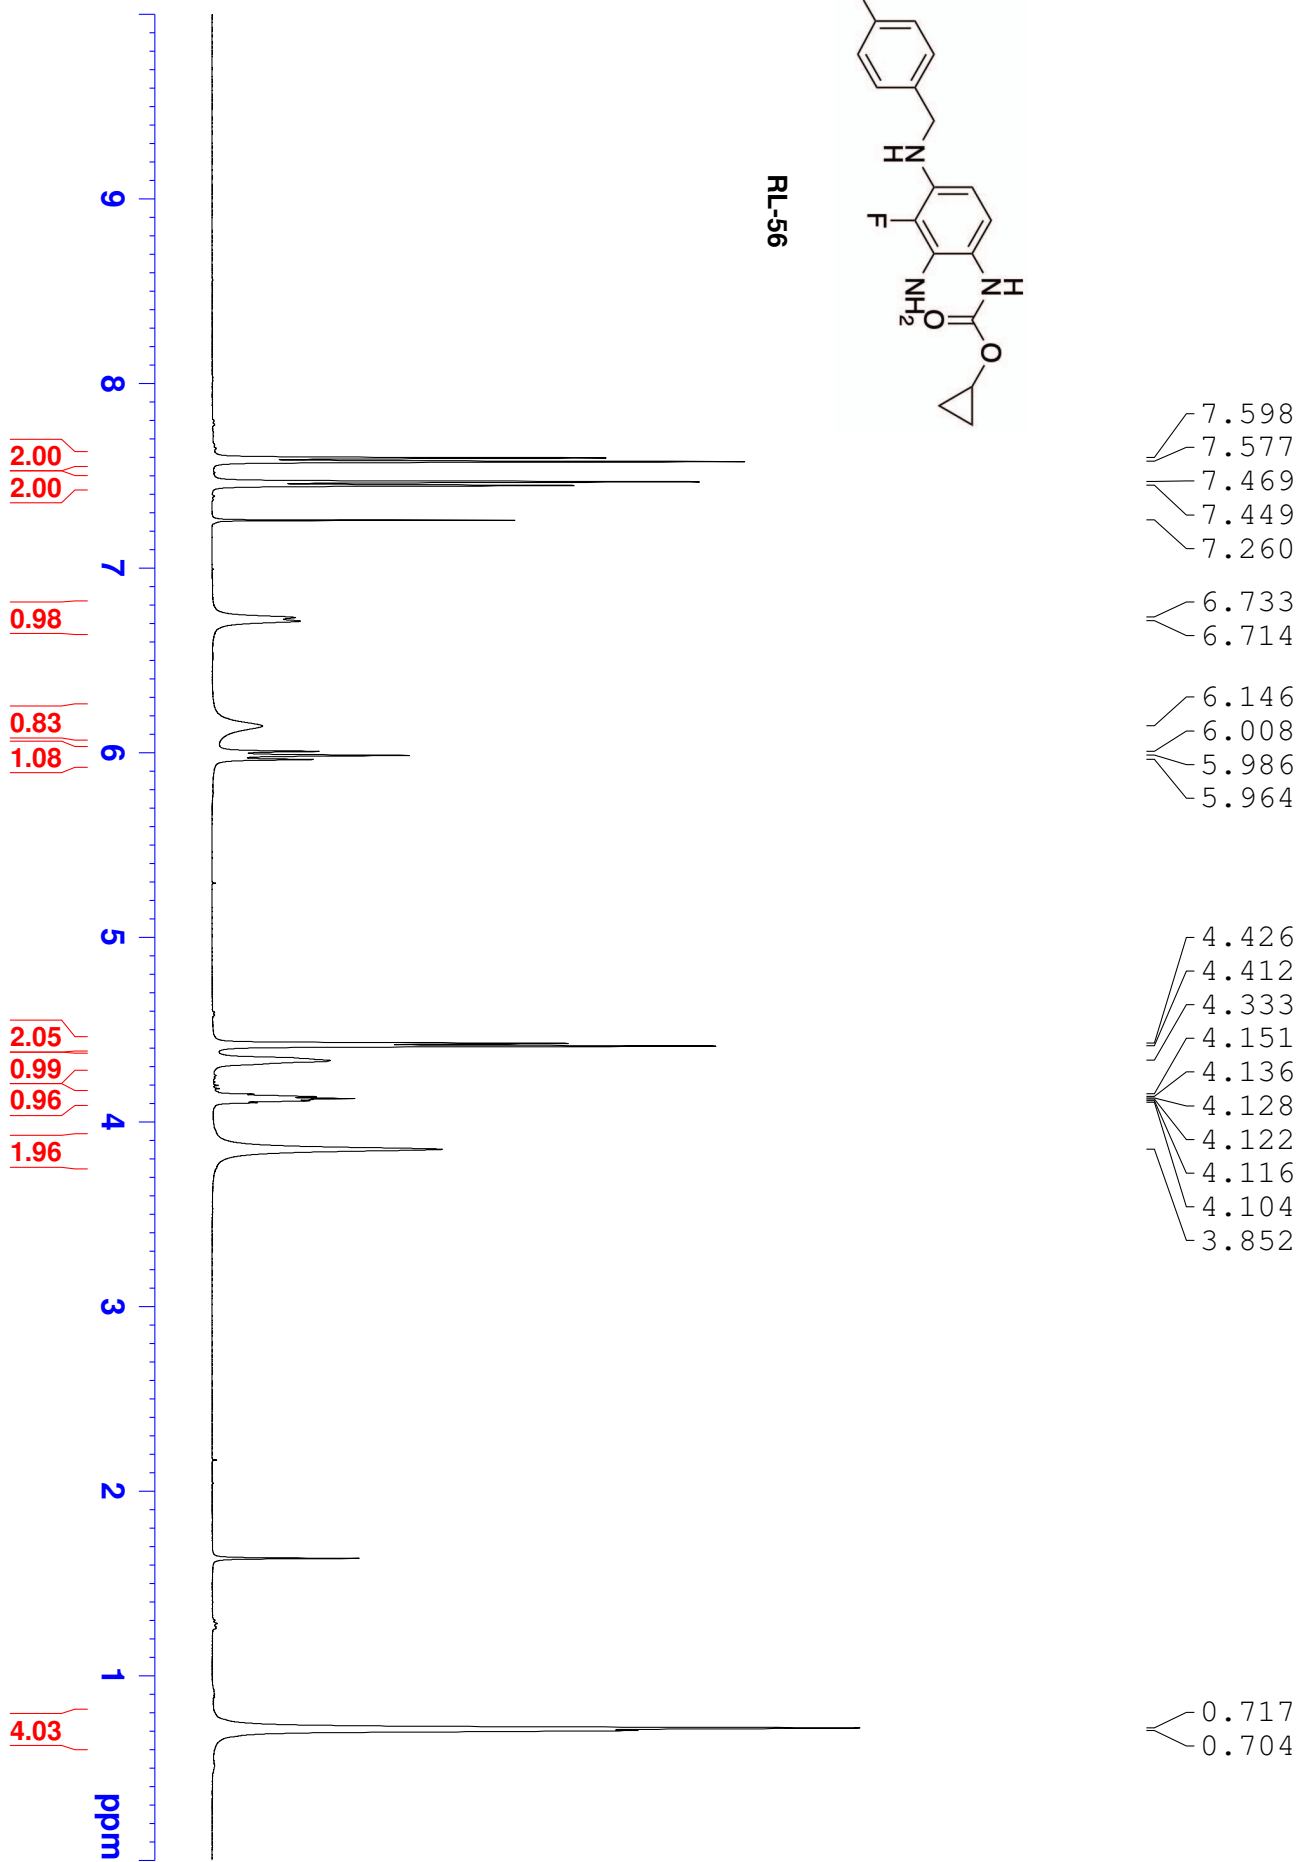

RL702.056 CDCl3 400a

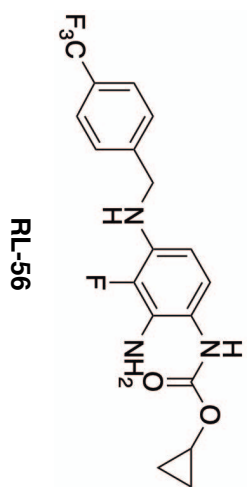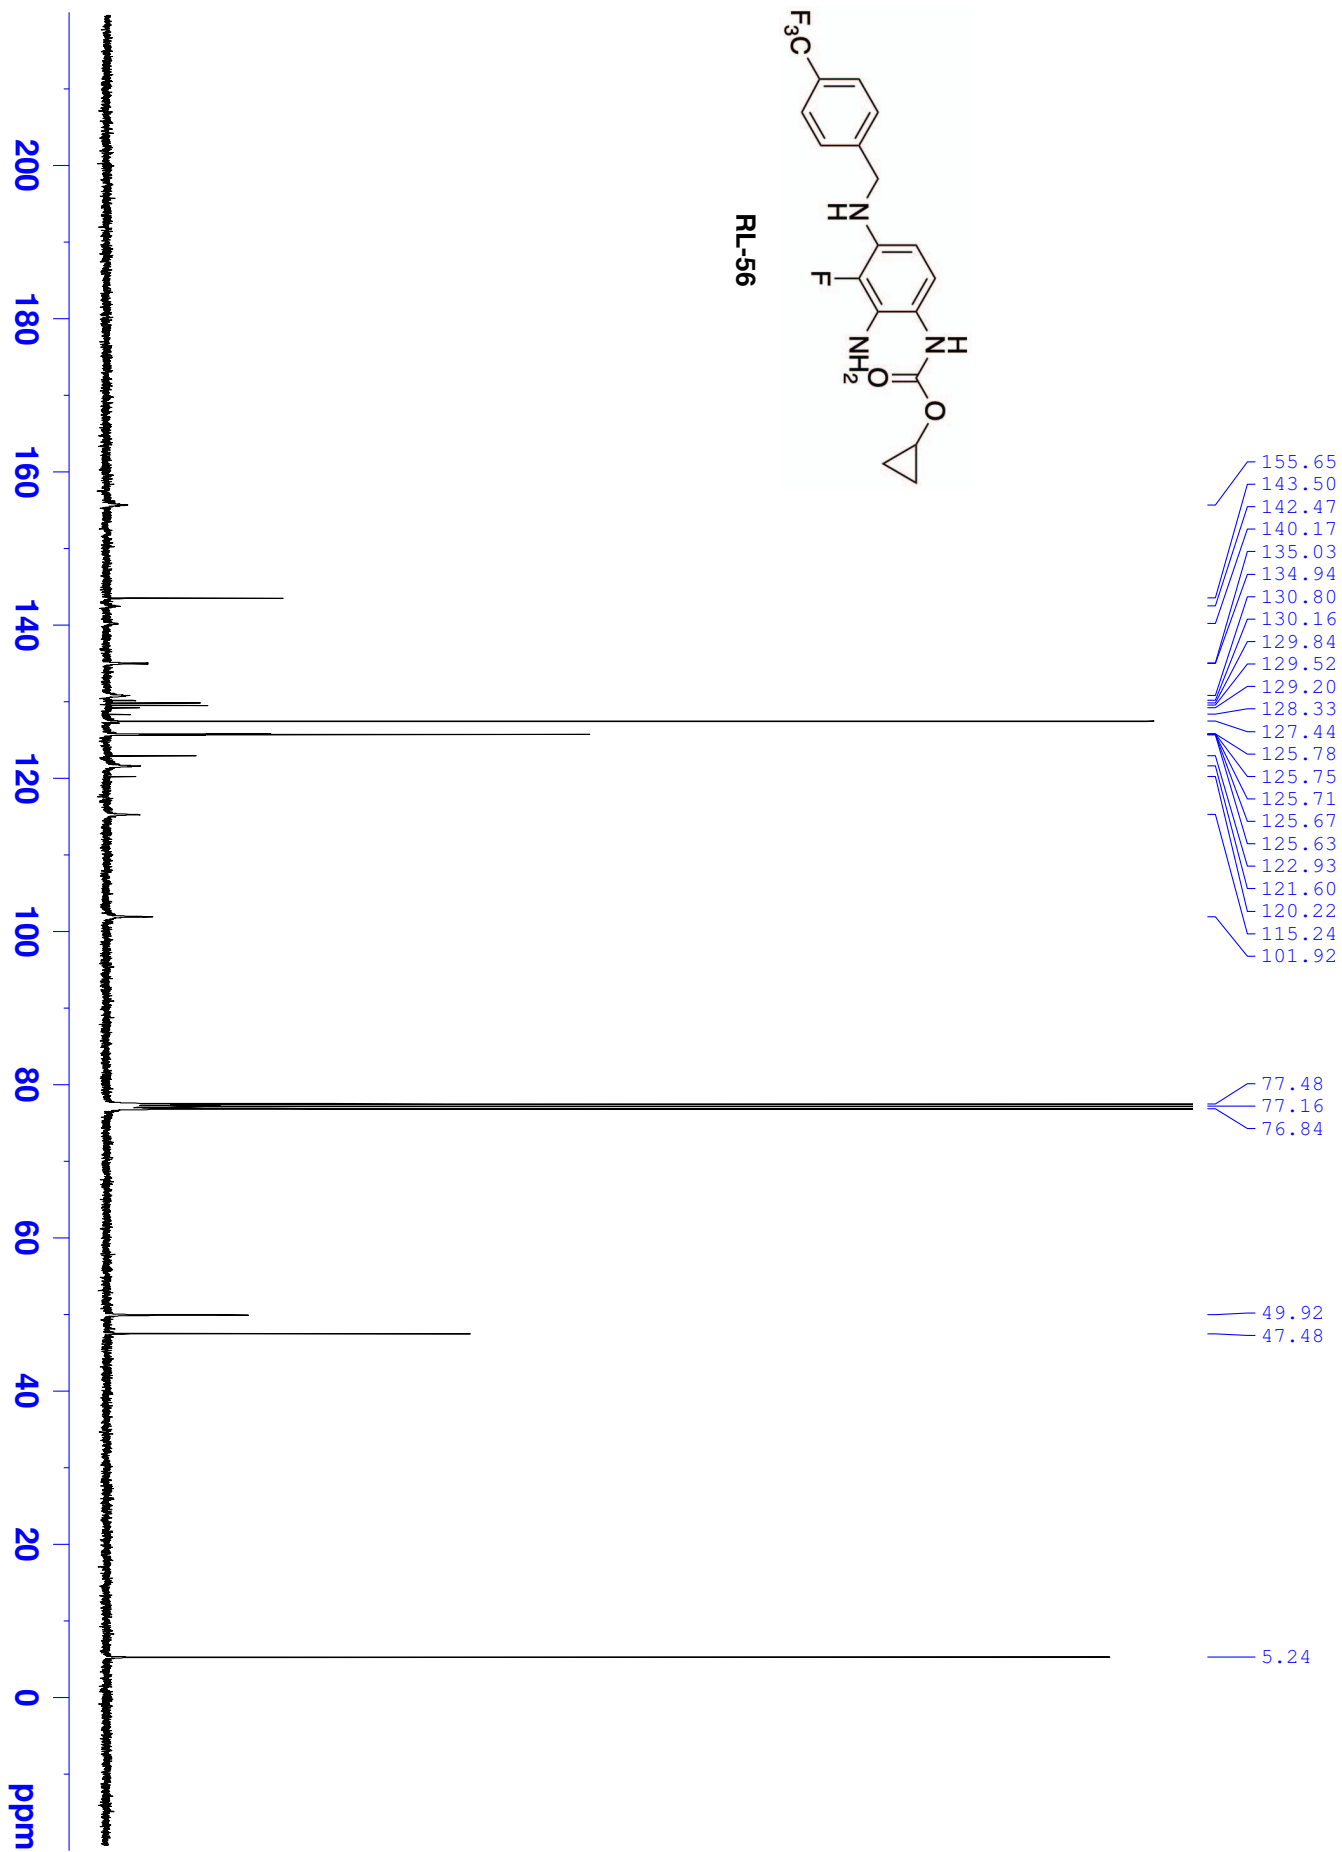

RL648.084 CDCl3 400b

CDCl3

- 7.874
- 7.870
- 7.850
- 7.846
- 7.587
- 7.576
- 7.572
- 7.535
- 7.530
- 7.514
- 7.495
- 7.476
- 7.260

- 6.069
- 6.048
- 6.045
- 6.025

- 4.926
- 4.550
- 4.535

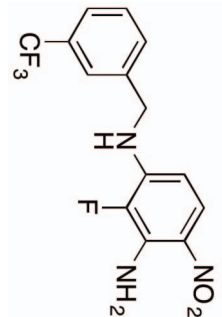

5b

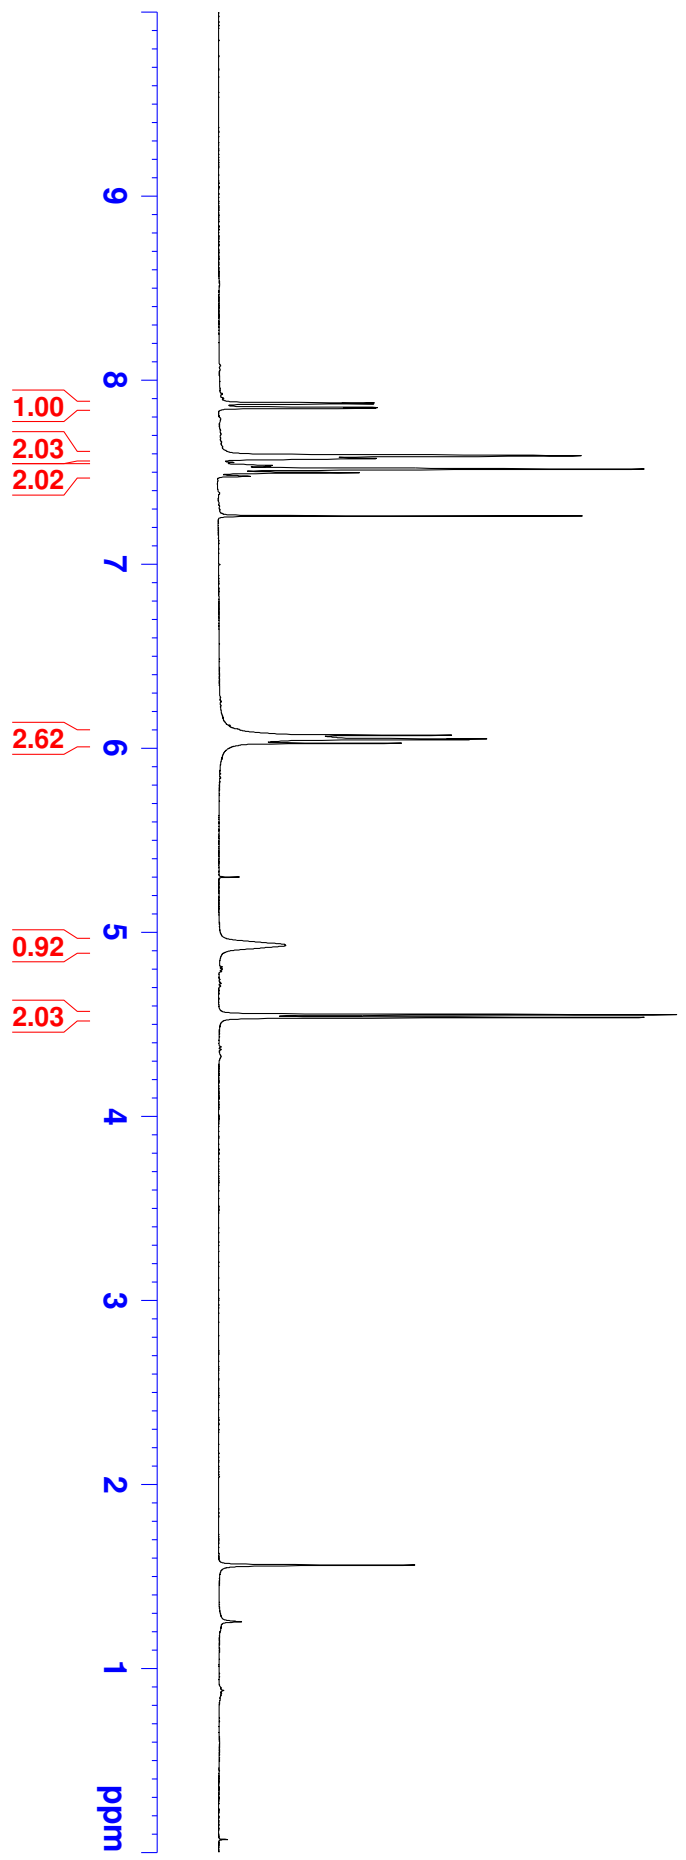

RL648.084 CDC13 400b

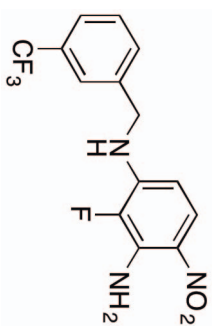

5b

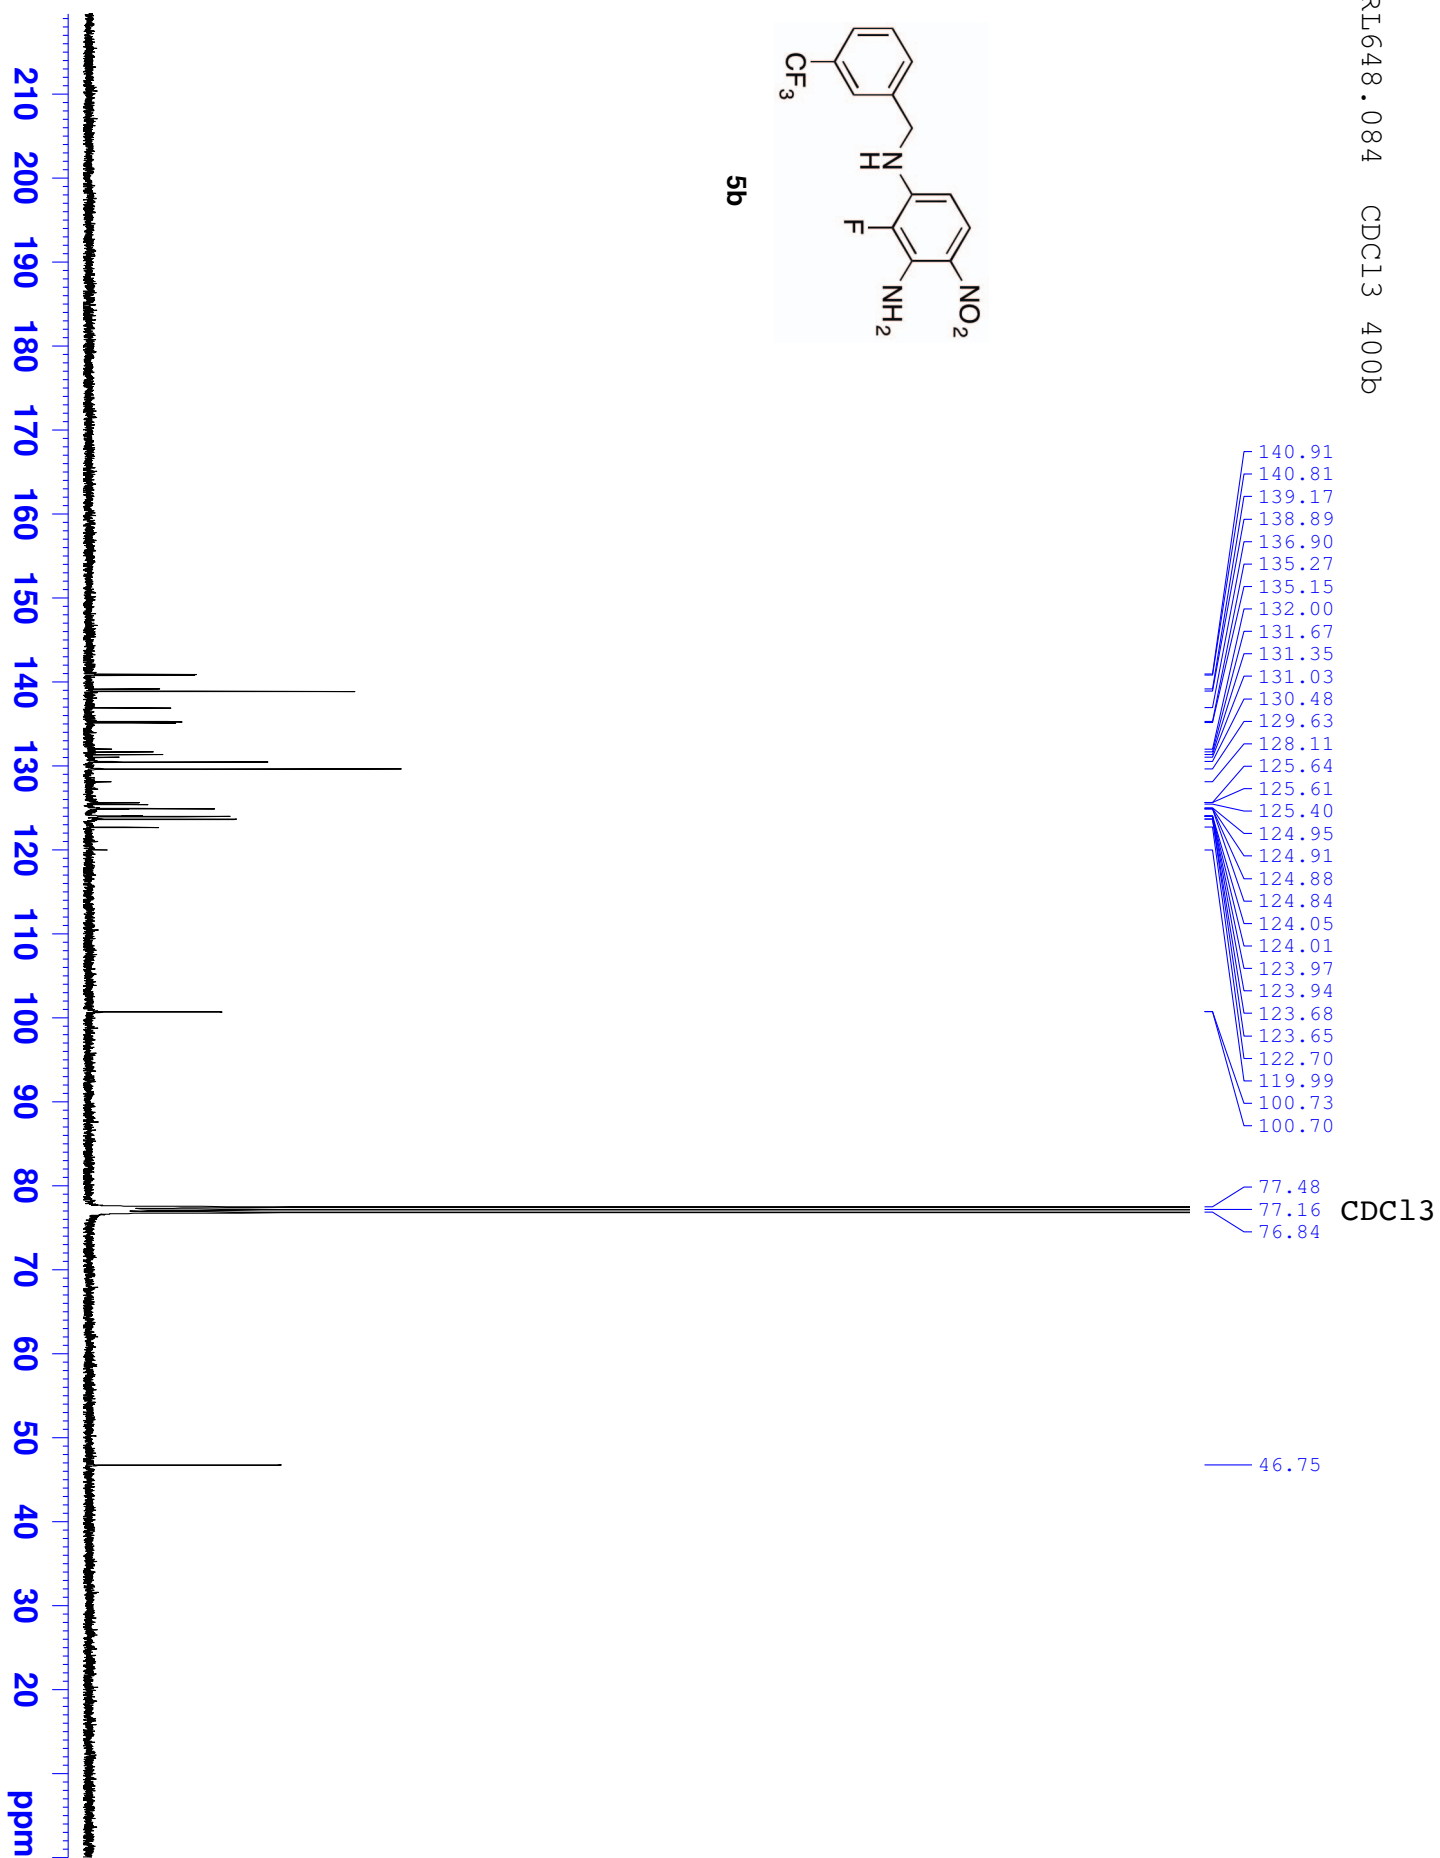



RL648.073 CDCl3 400b

CDCl3

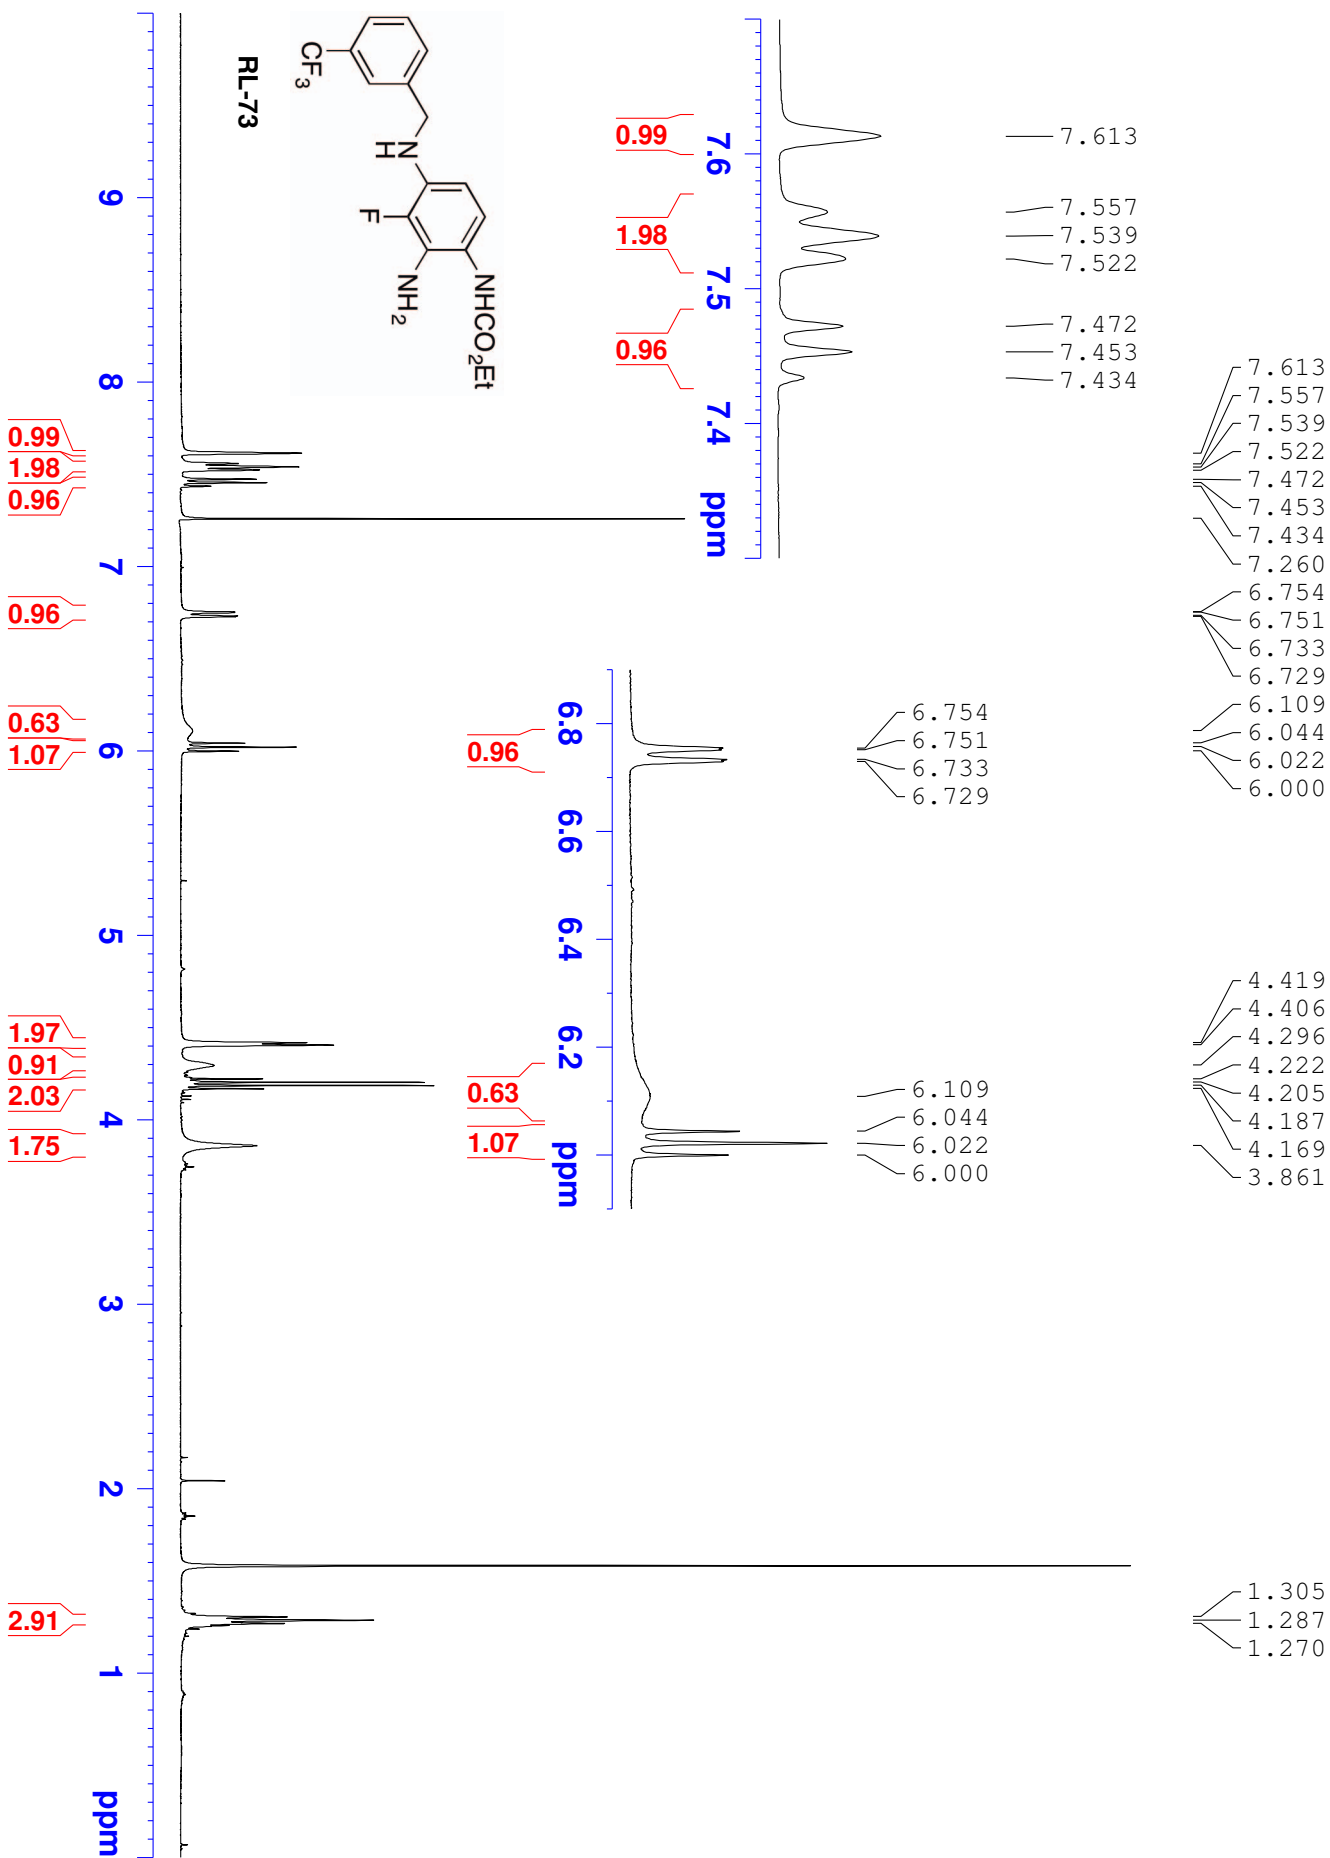

RL648.073 Acetone-d6 400b

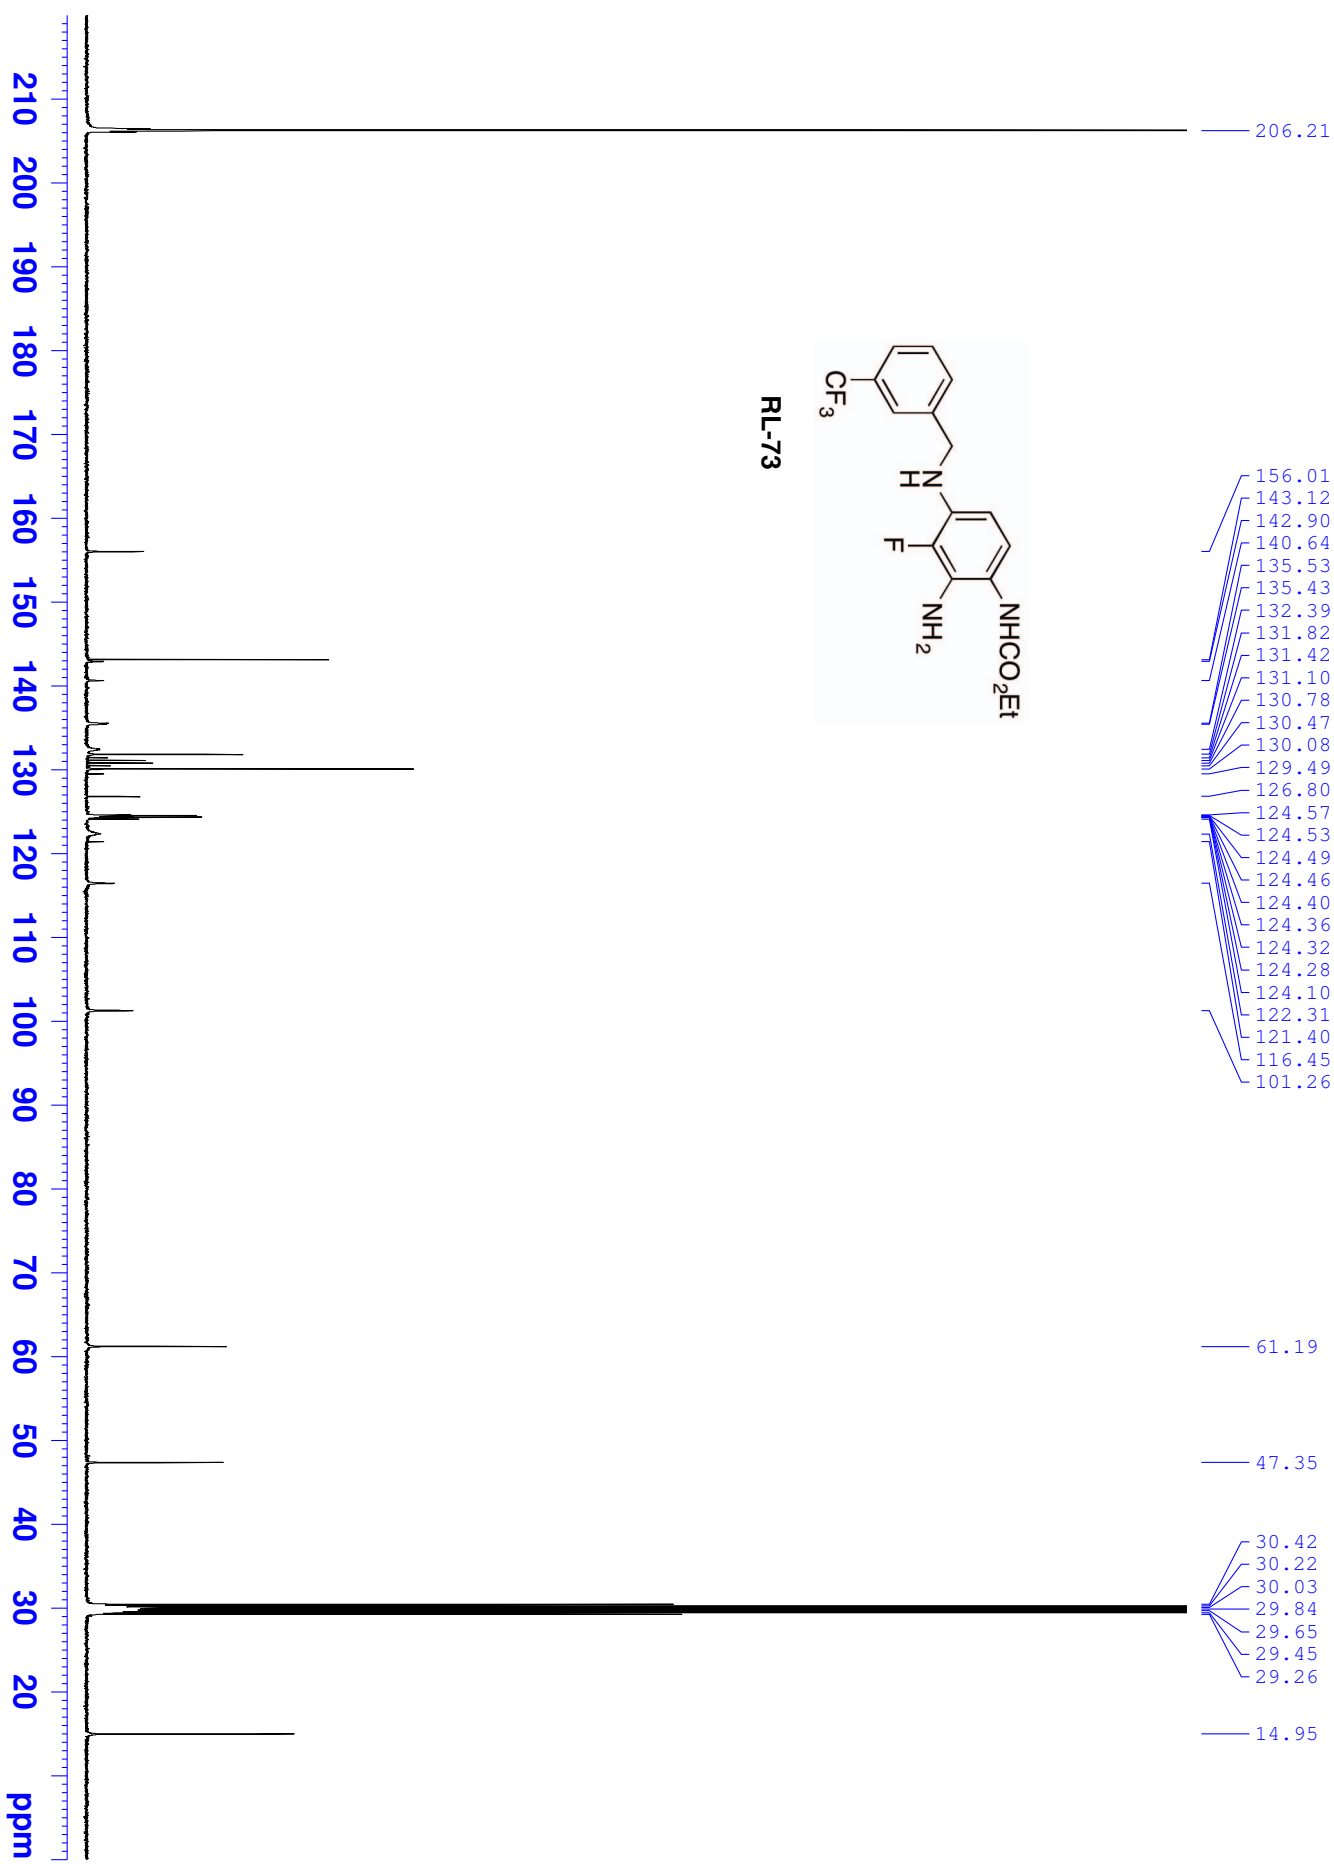

RL648.094 CDCl3 400b

CDCl3

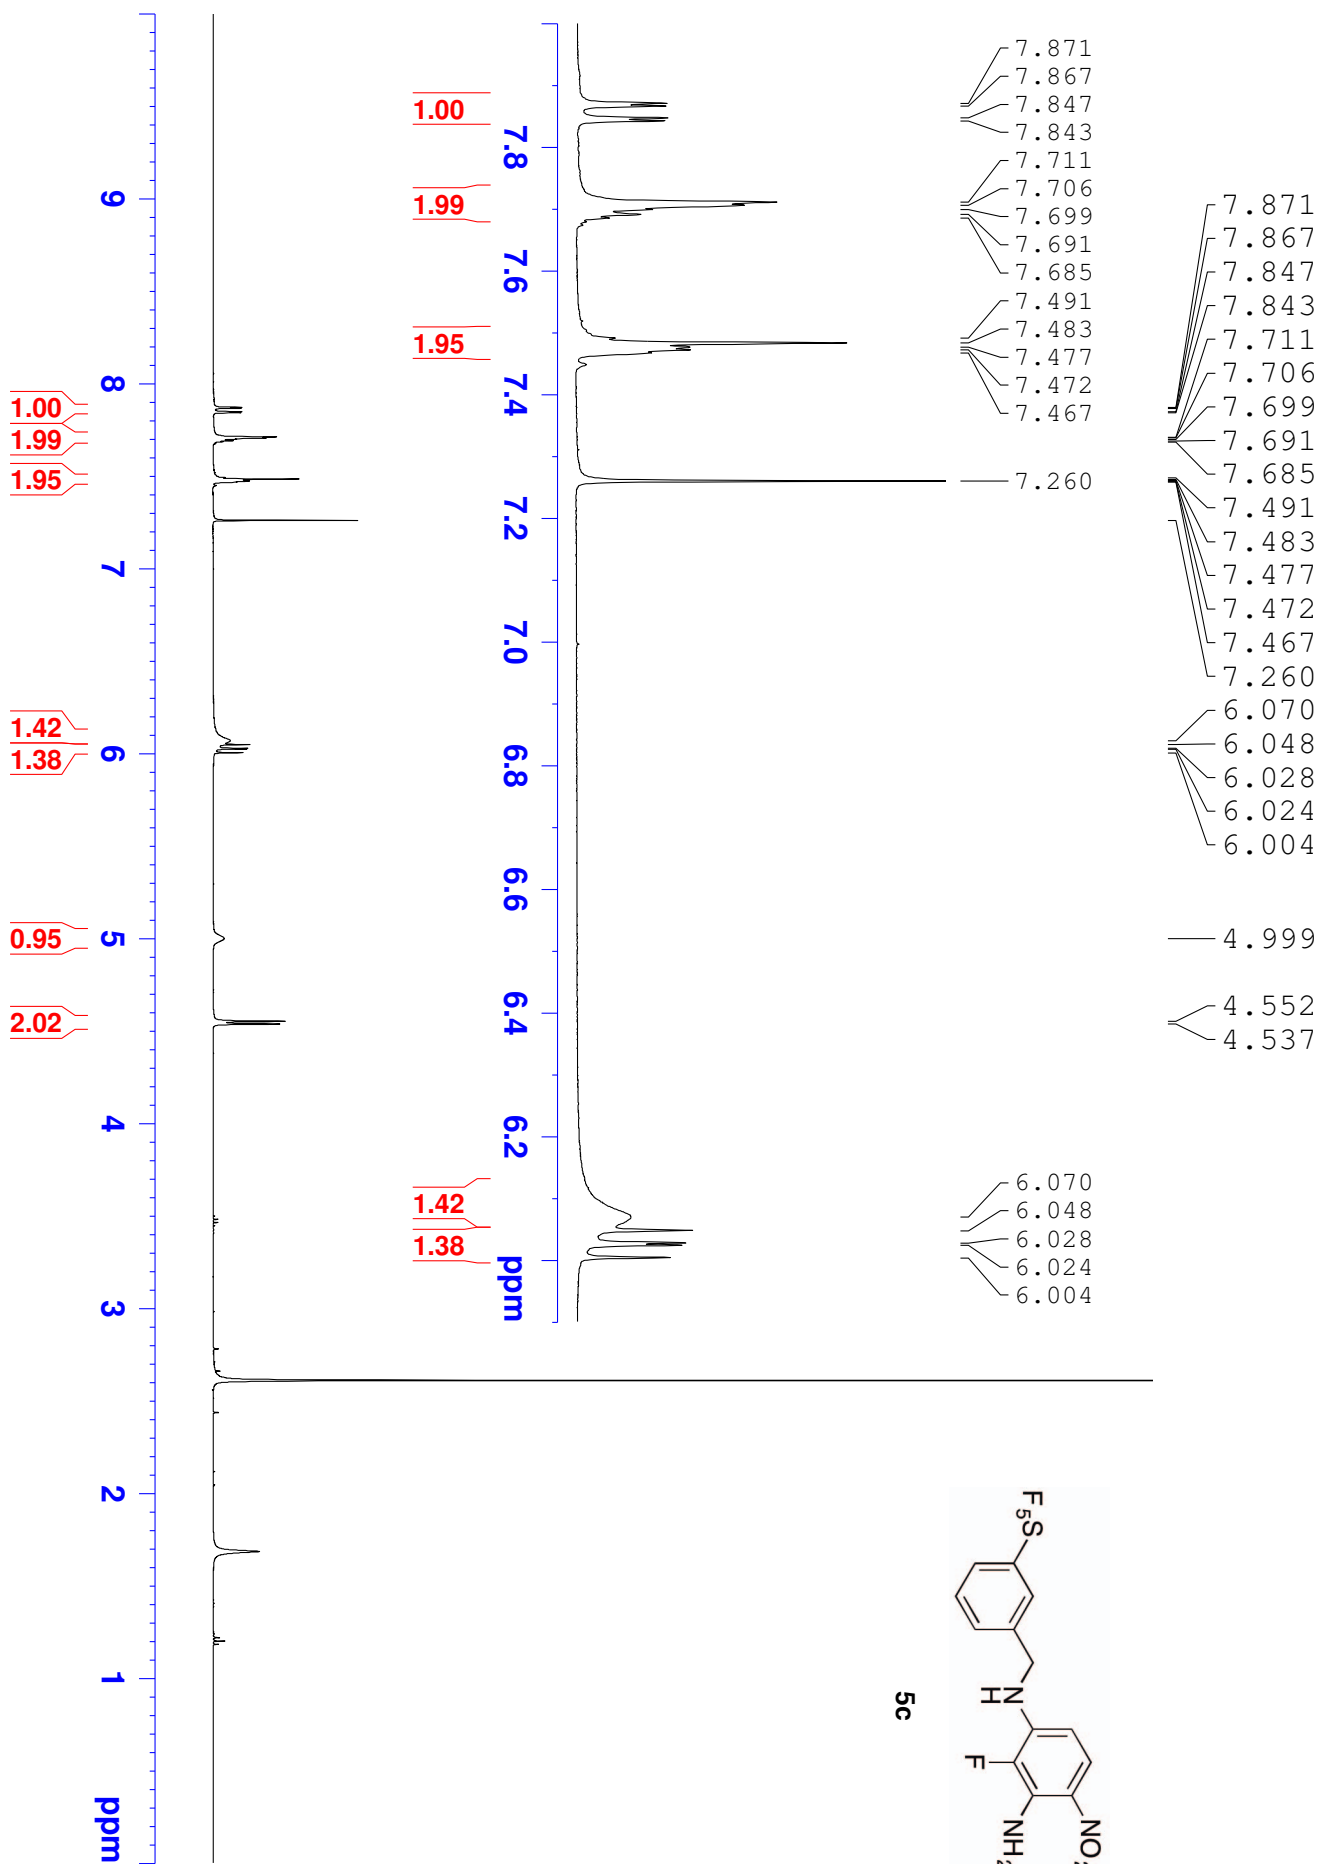

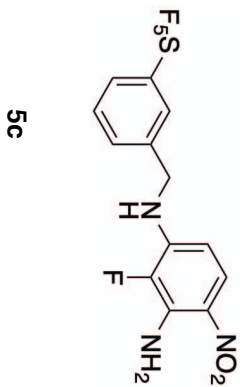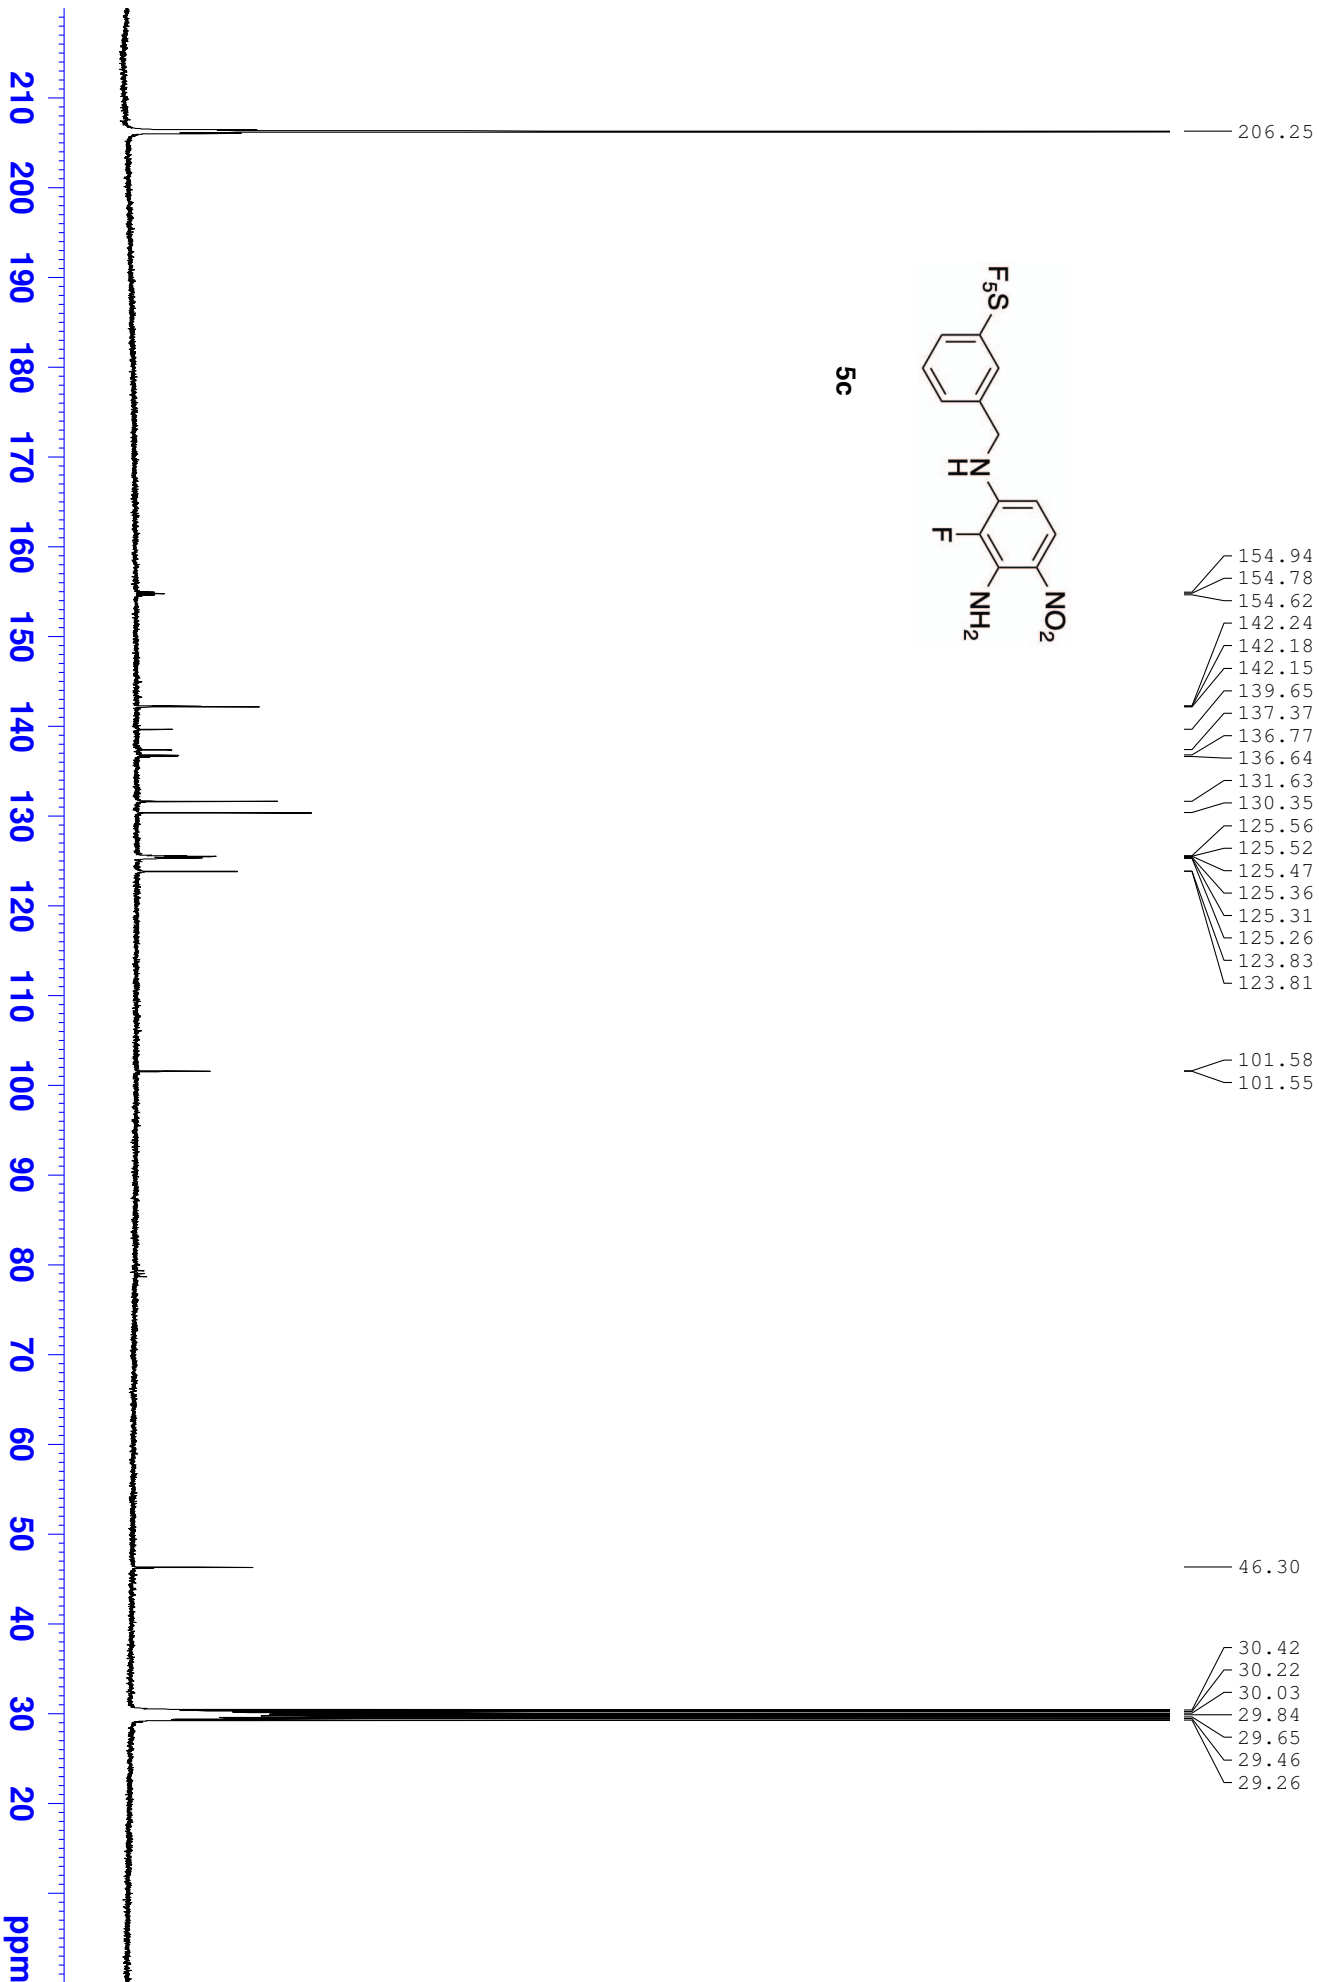

acetone-d6

RL673.002 CDCl3 400b

CDCl3

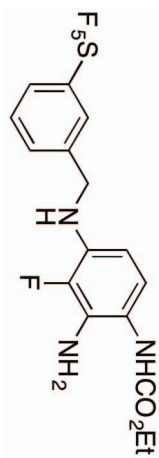

RL-02

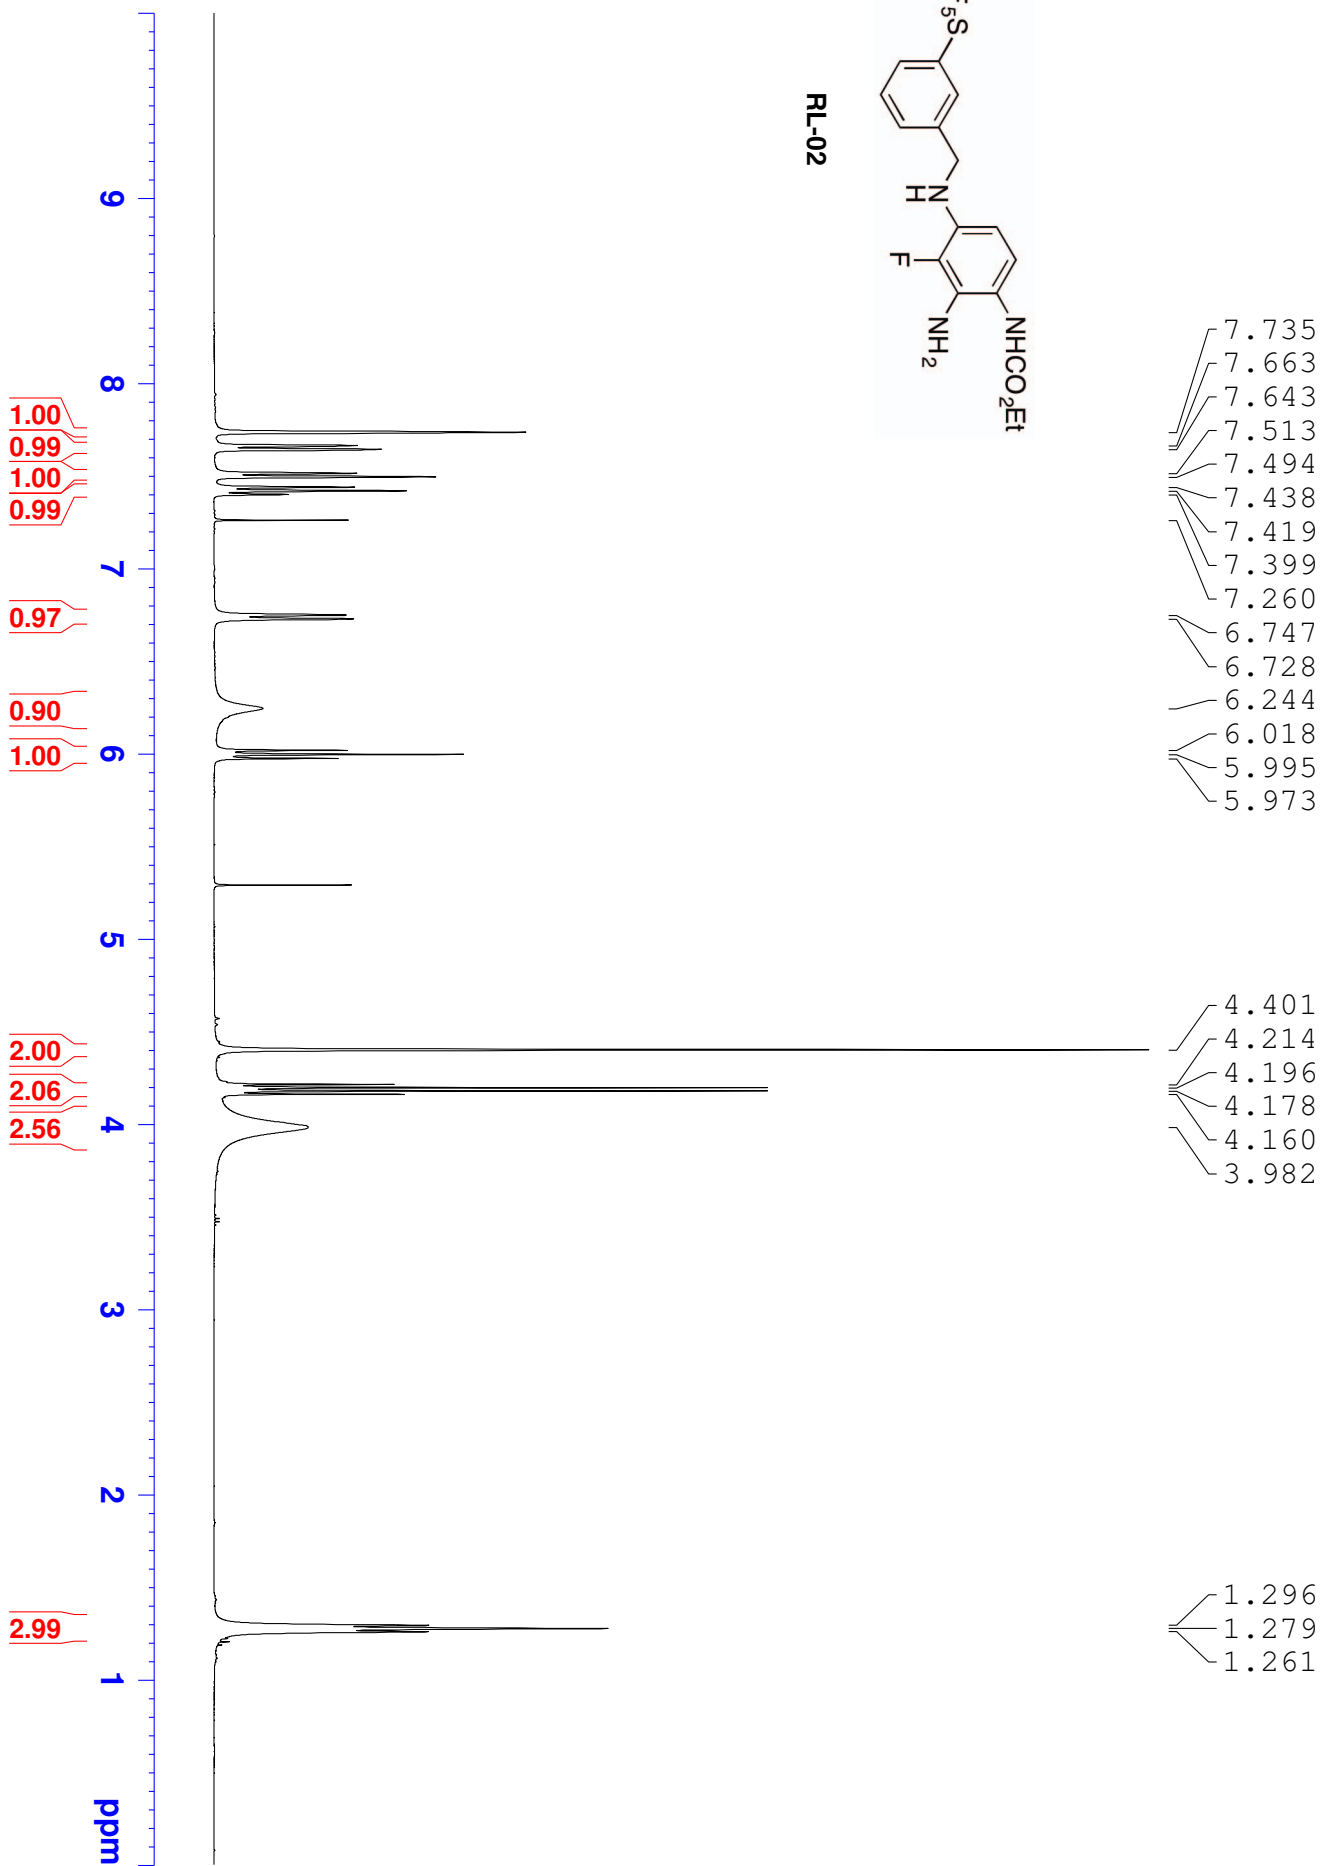

RL673.002 CDCl3 400b

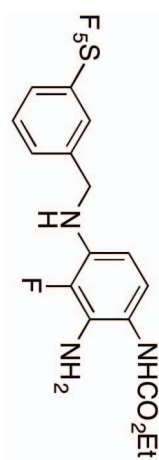

RL-02

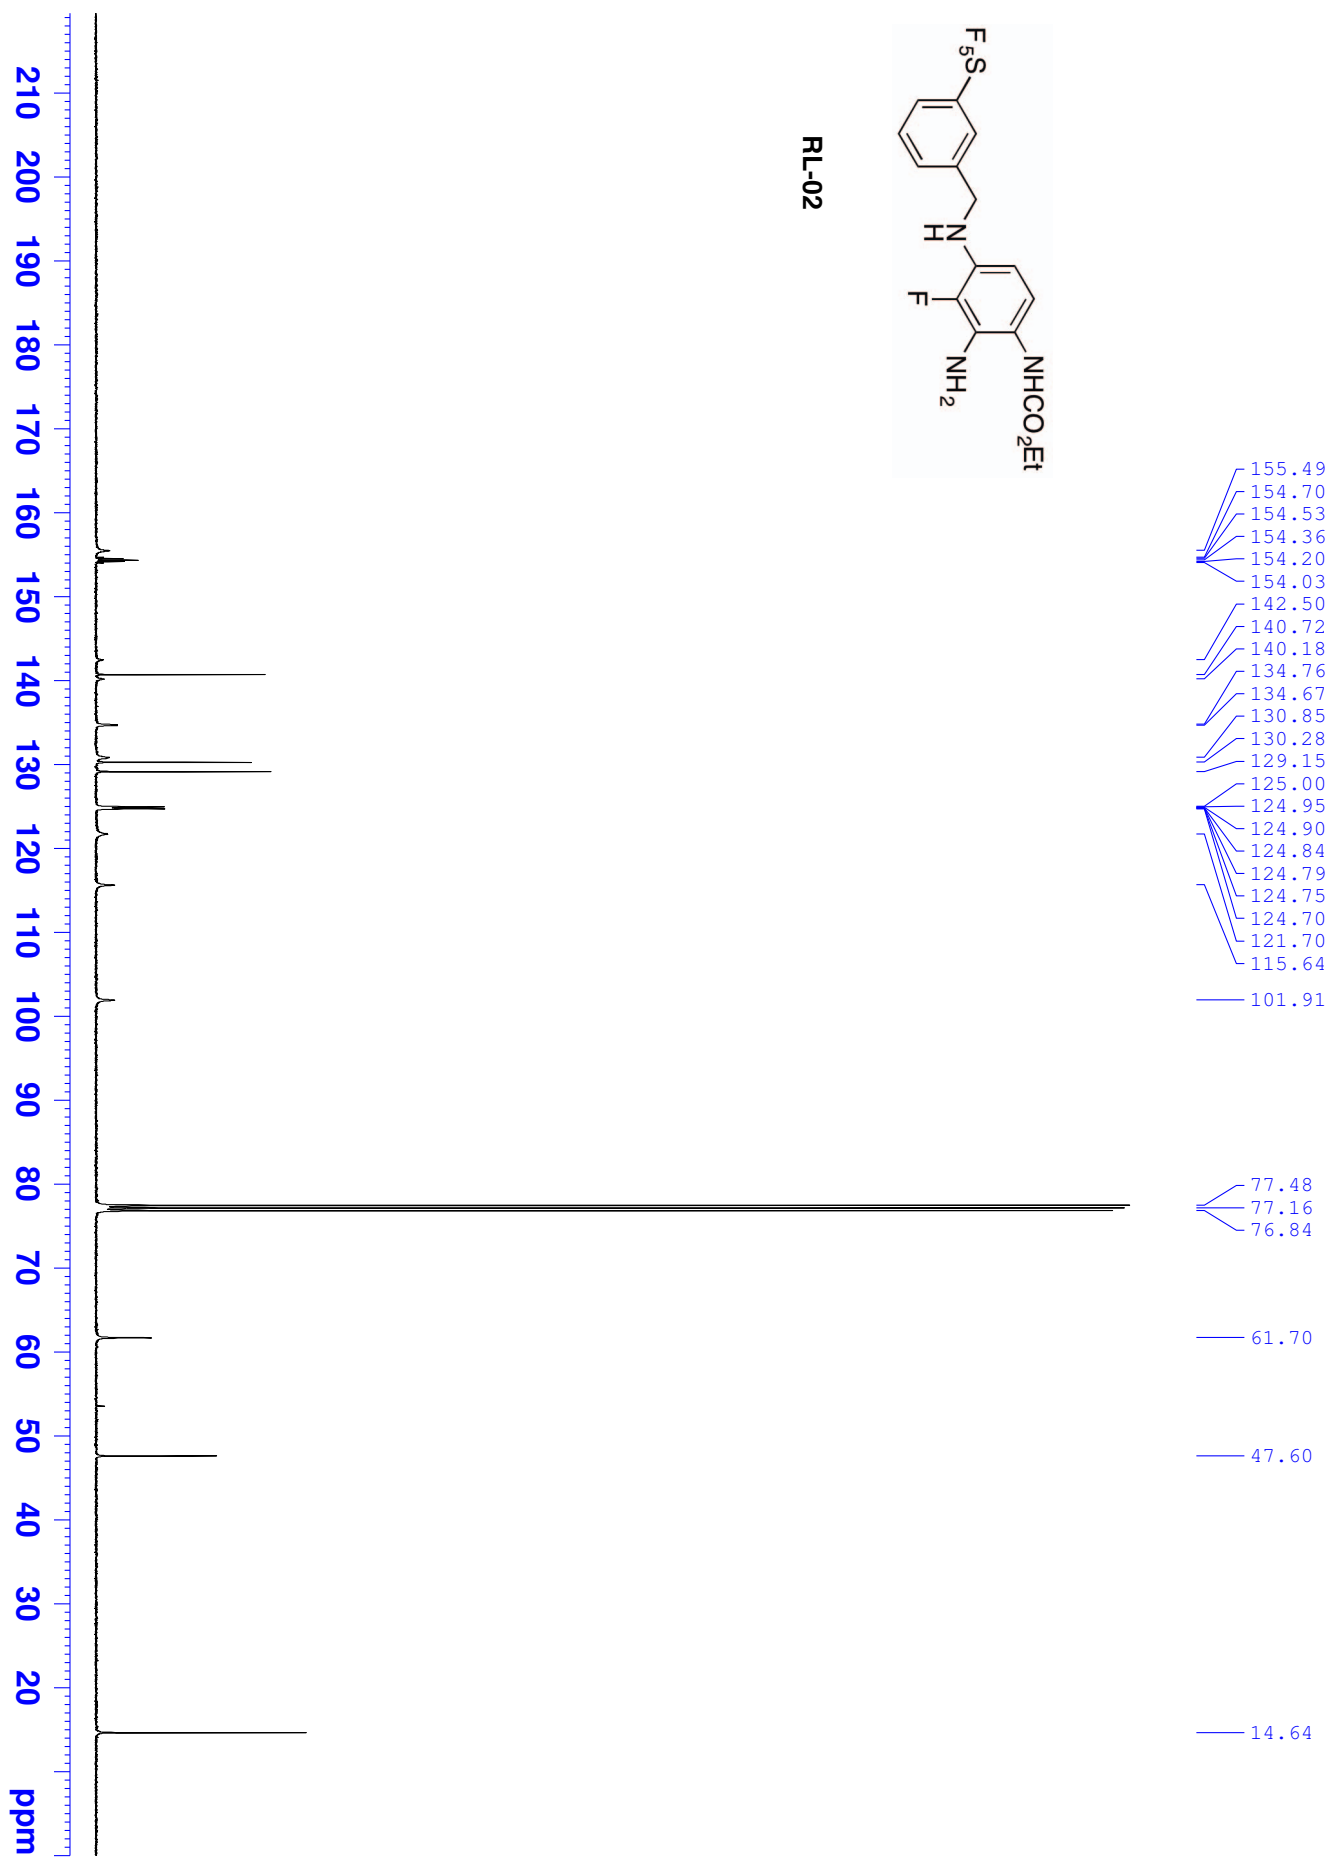

RL762.070 CDCl3 400a

CDCl3

|       |   |
|-------|---|
| 7.809 |   |
| 7.778 |   |
| 7.652 |   |
| 7.632 |   |
| 7.457 |   |
| 7.437 |   |
| 7.260 |   |
| 6.135 | — |
| 5.696 | — |
| 5.677 | — |
| 5.120 | — |
| 4.503 | — |
| 4.488 | — |

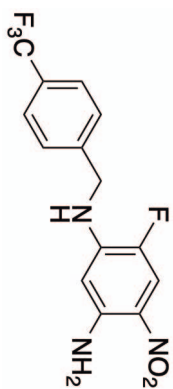

5d

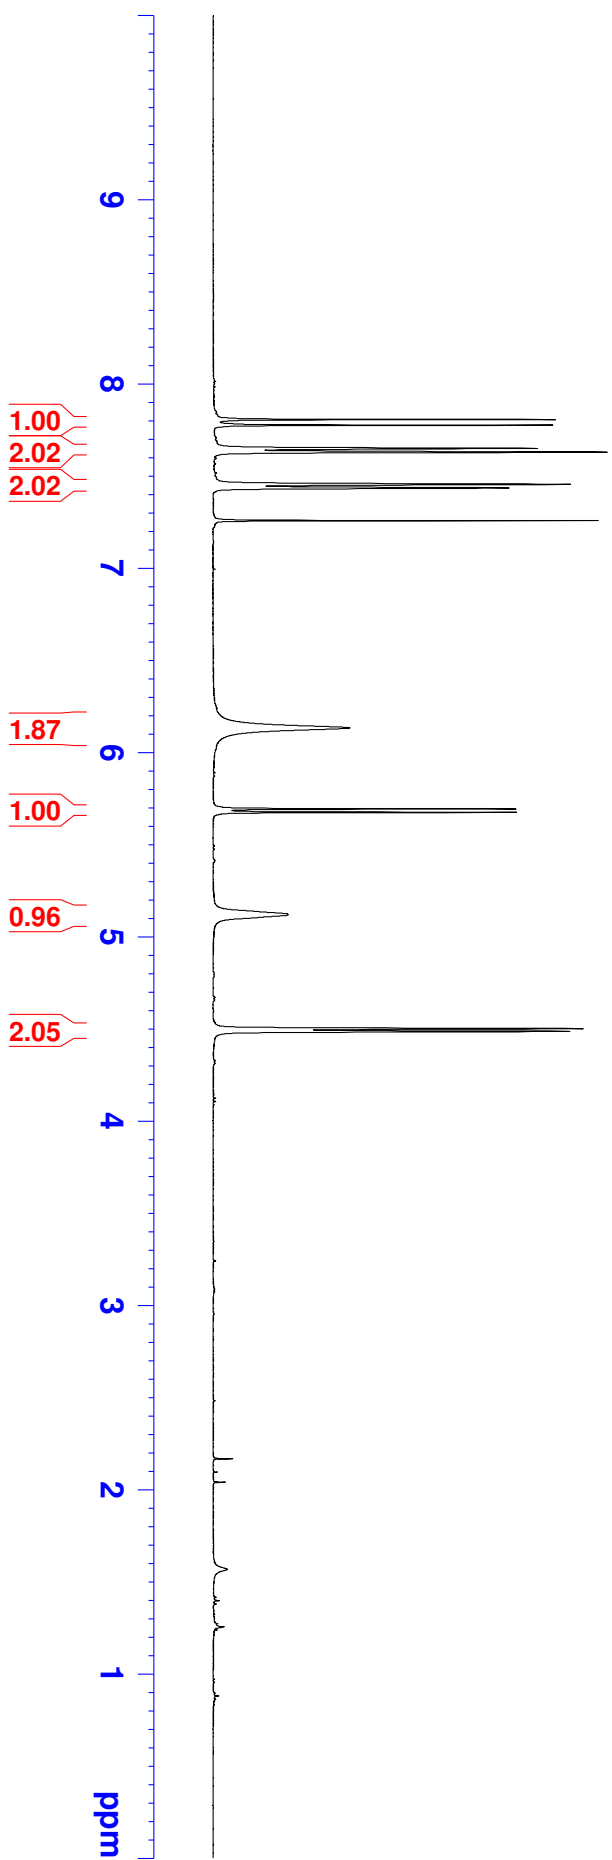

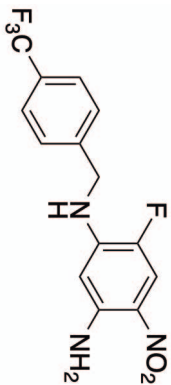

5d

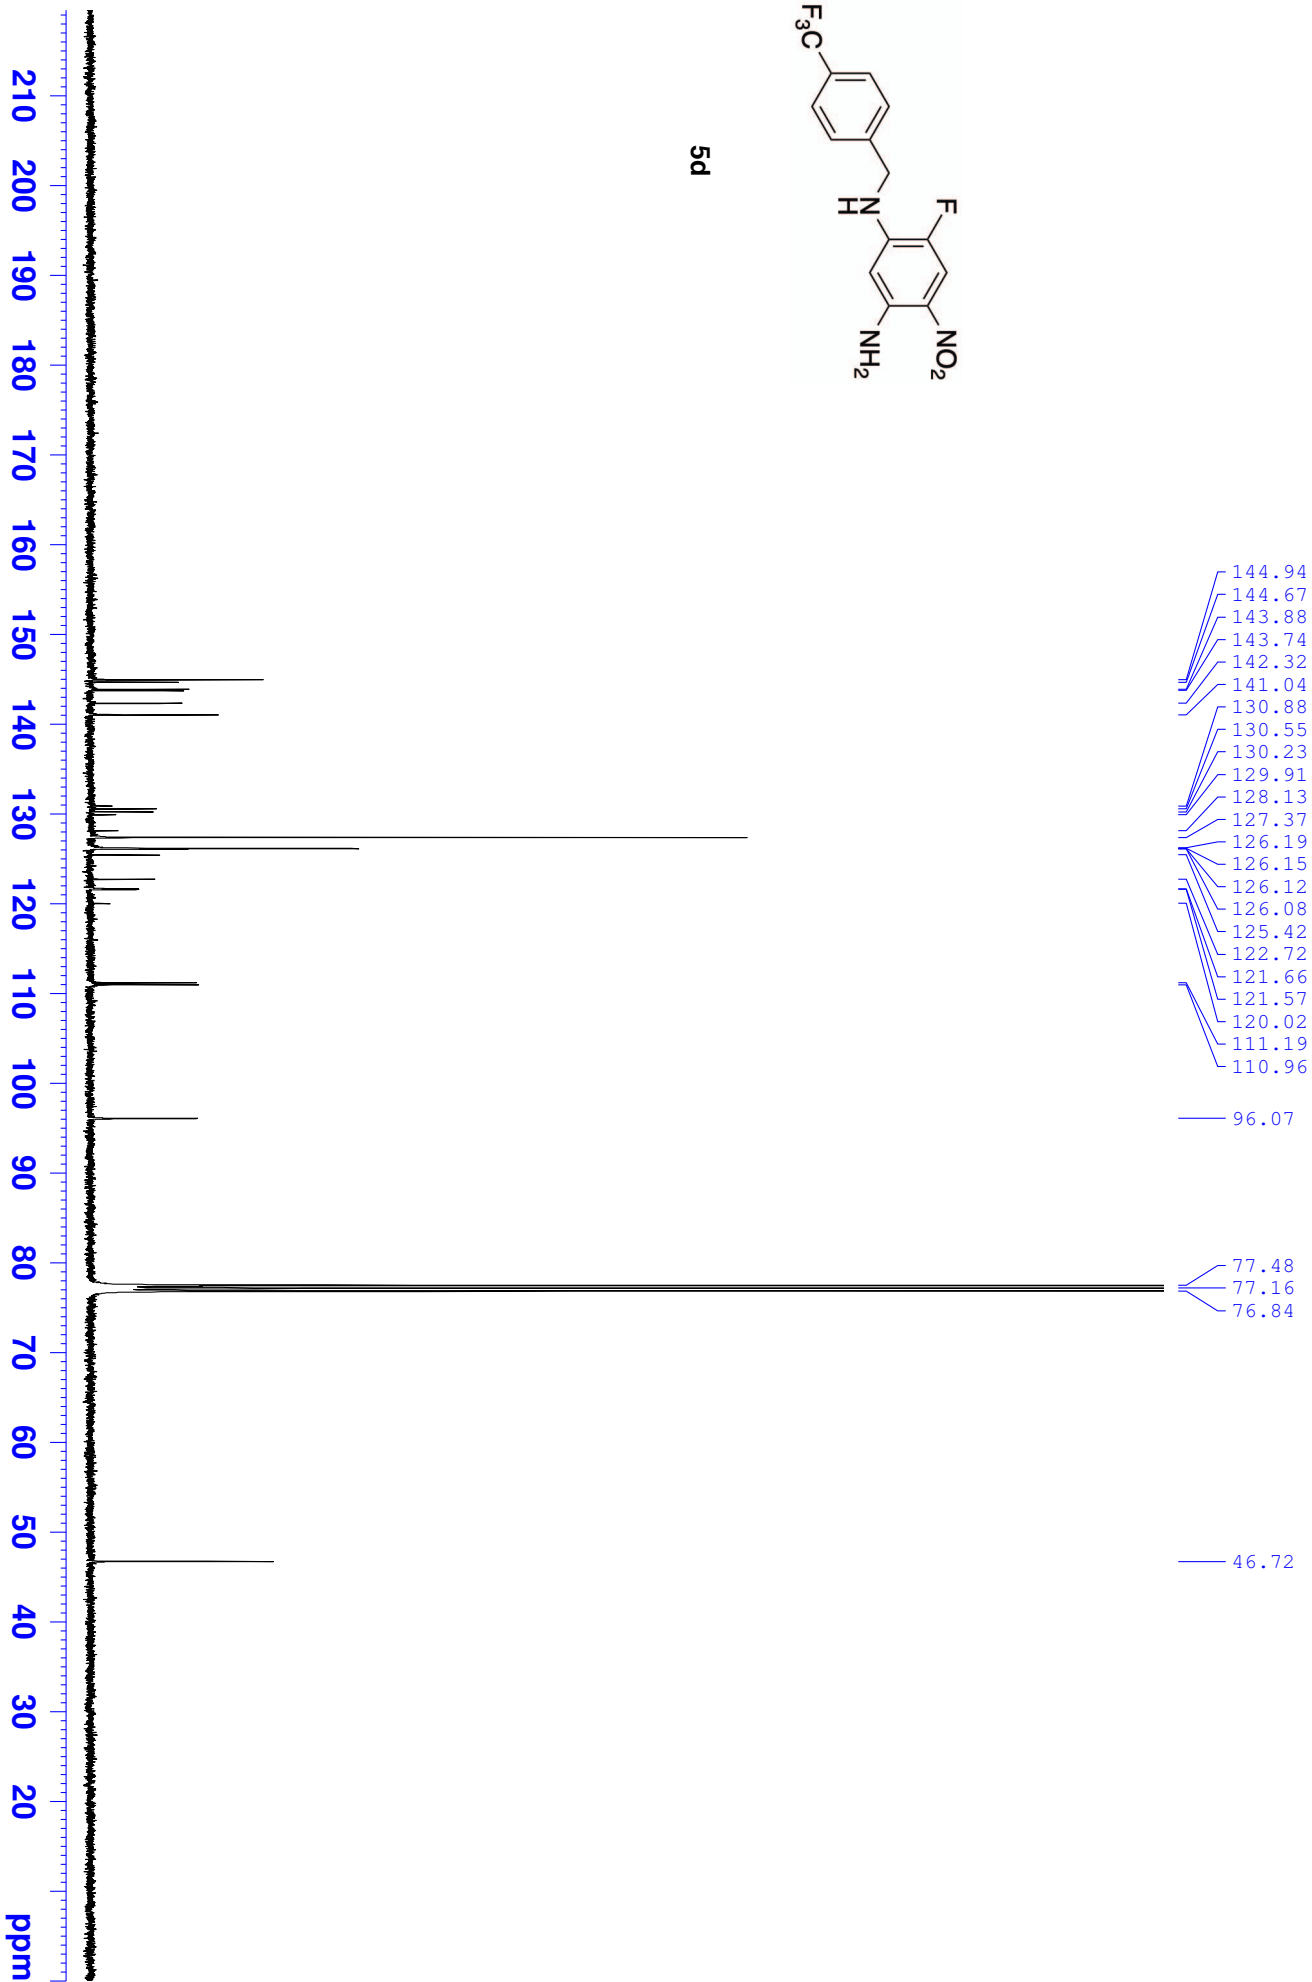

CDCl3



CDCl3

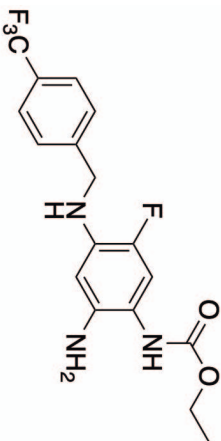

RL-72

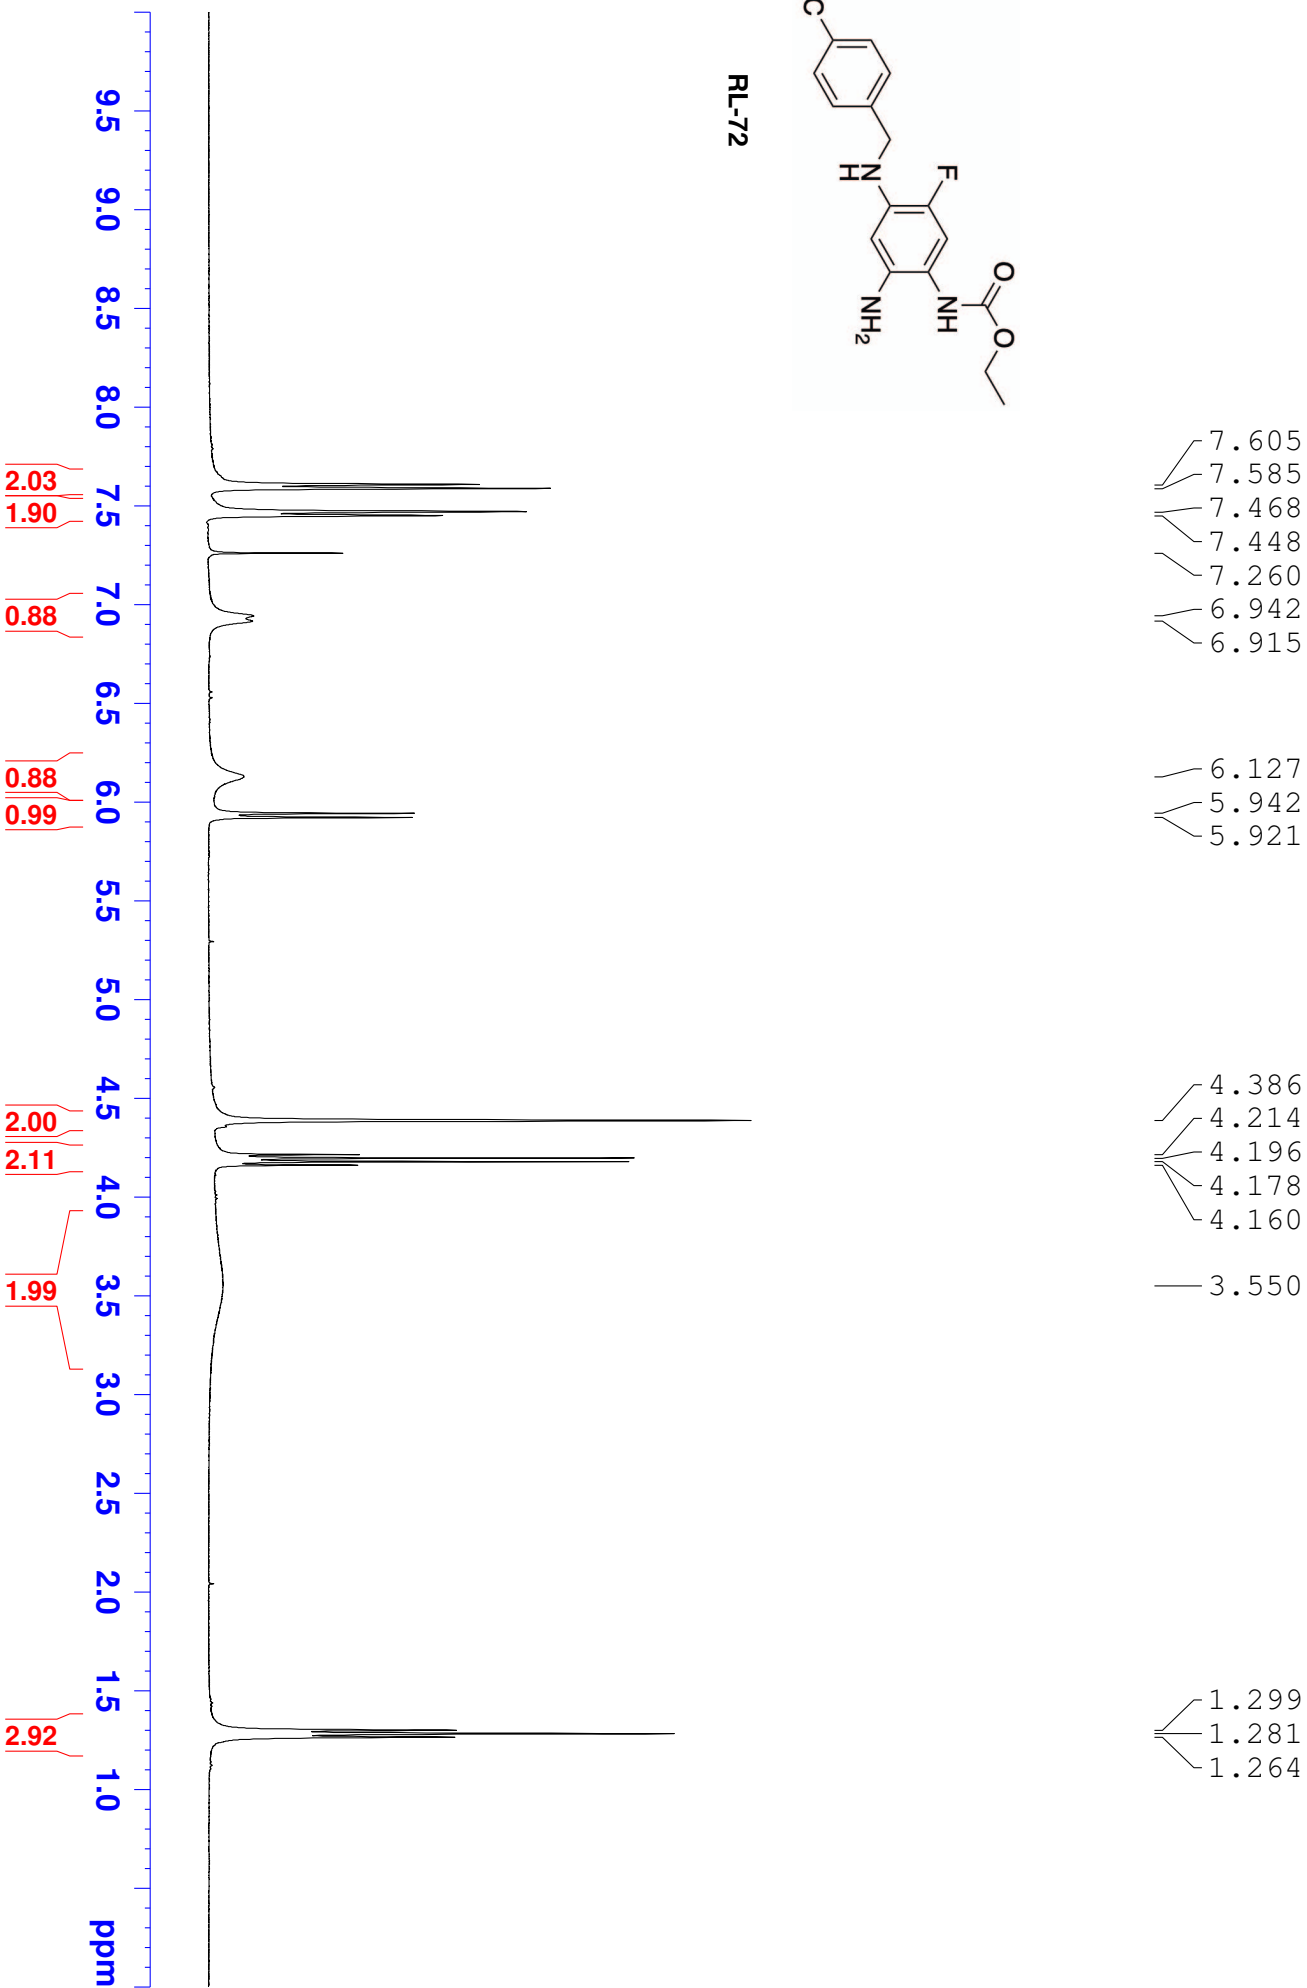

RL762.072 CDCl3 400b

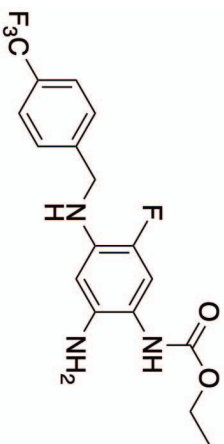

RL-72

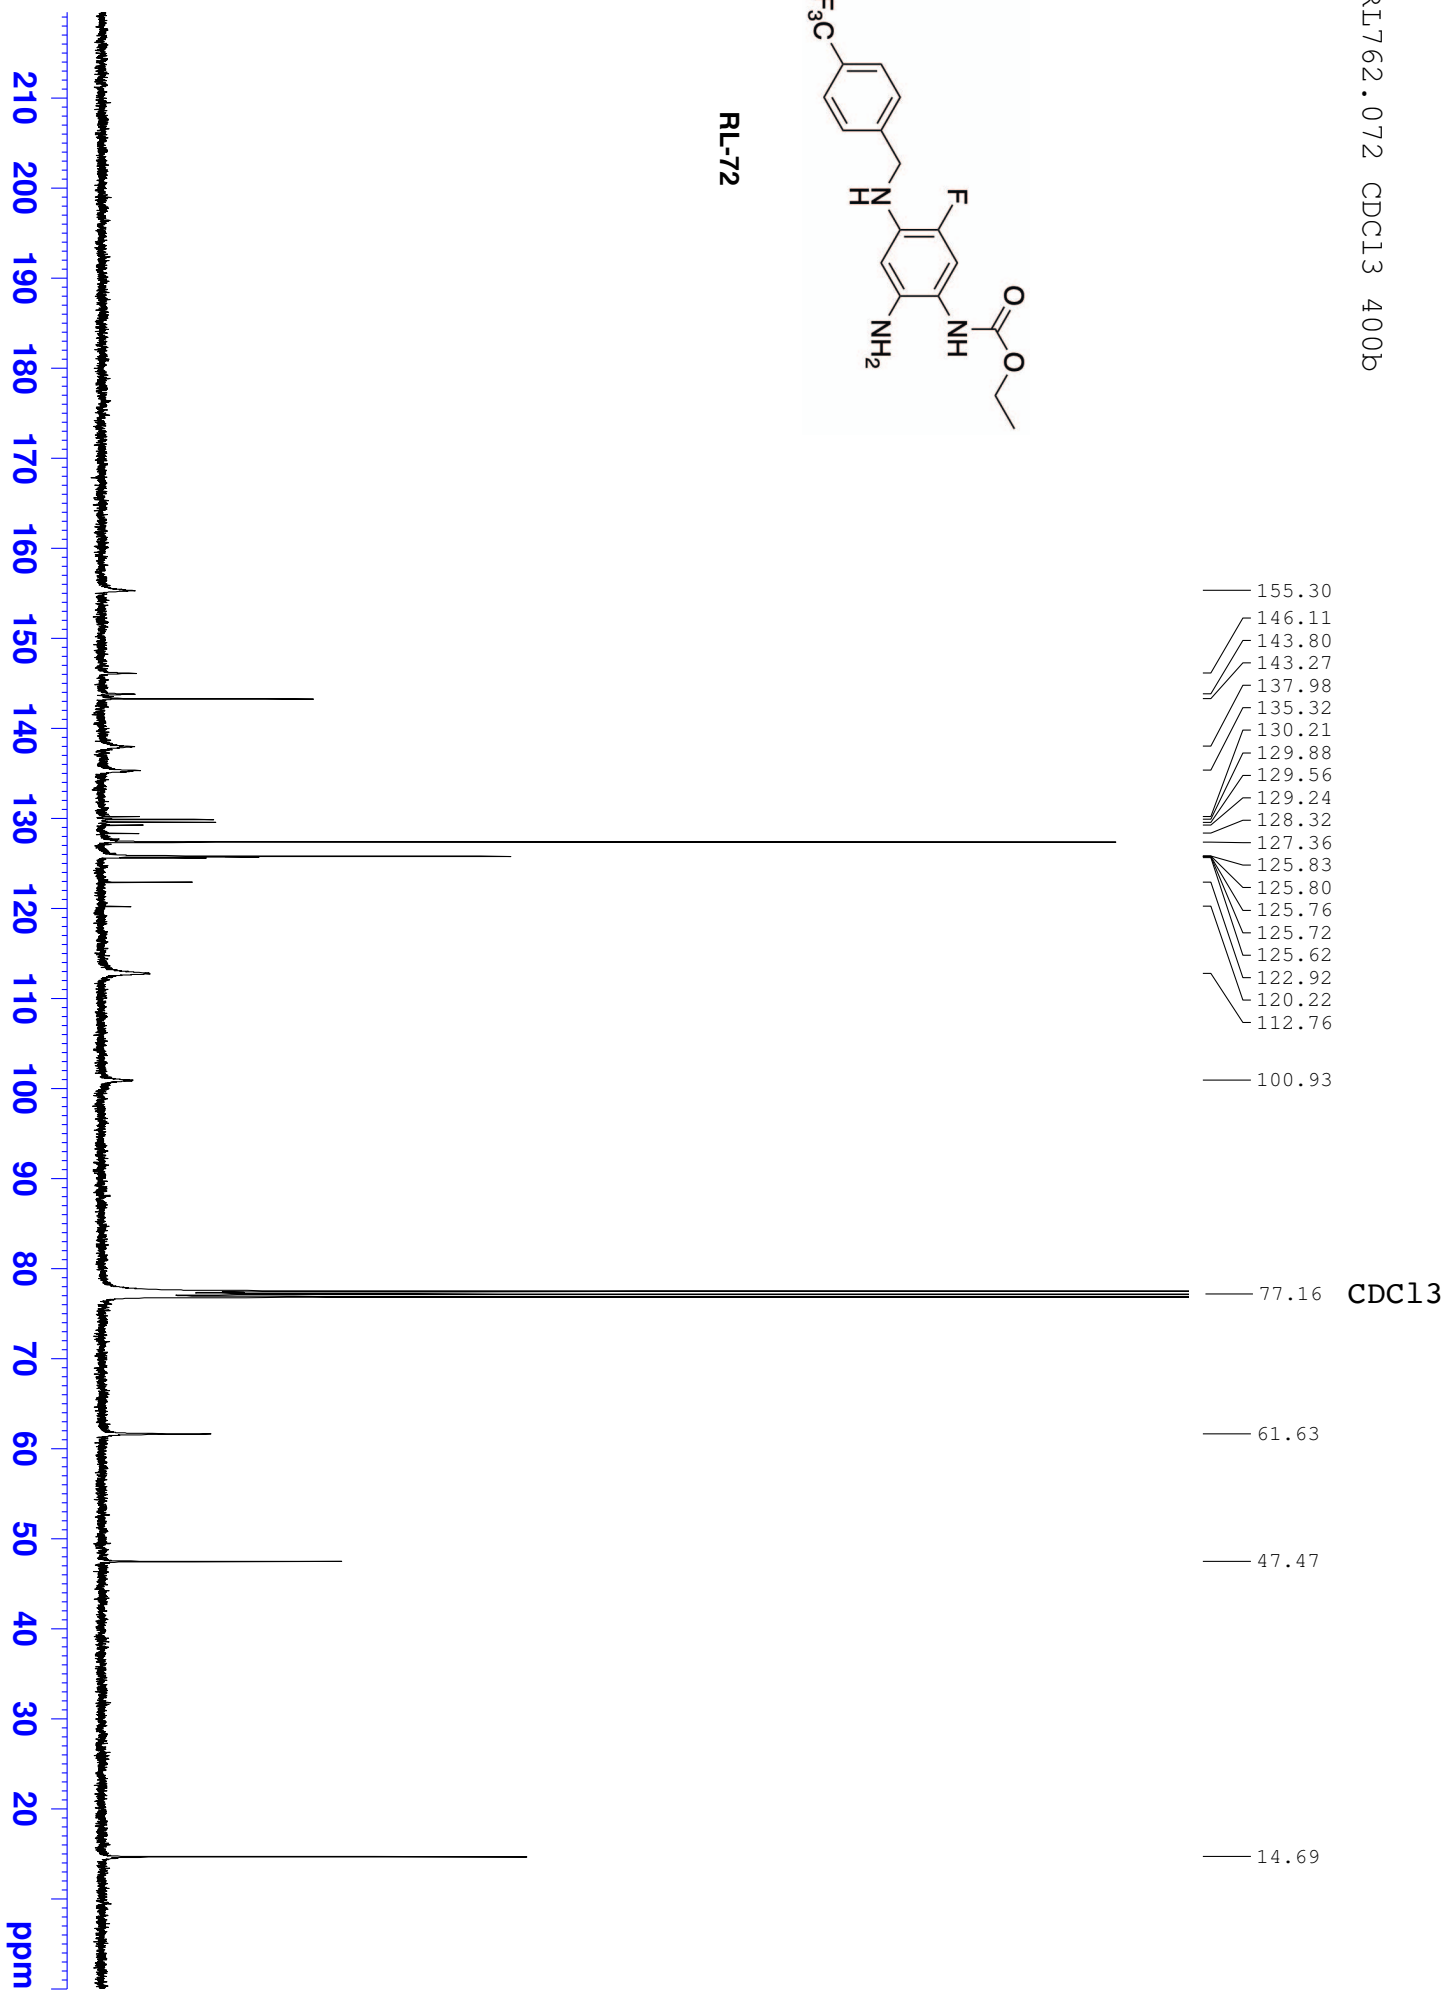

RL702.013 Acetone-d6 400b

7.791  
7.767  
7.678  
7.658  
7.639  
7.542  
7.526  
7.512  
6.705  
6.594  
6.239  
6.216  
6.195

4.751  
4.735

2.061  
2.055  
2.050  
2.045  
2.039

acetone-d6

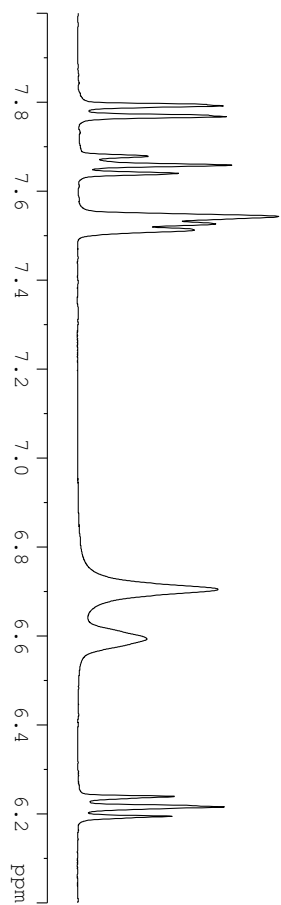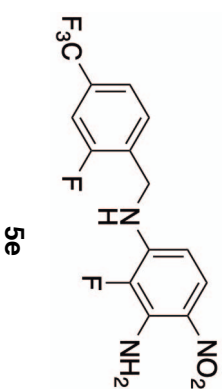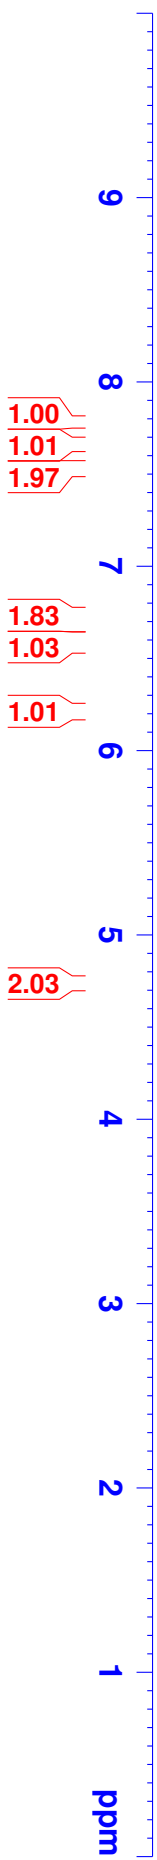

RL702.013 Acetone-d6 400b

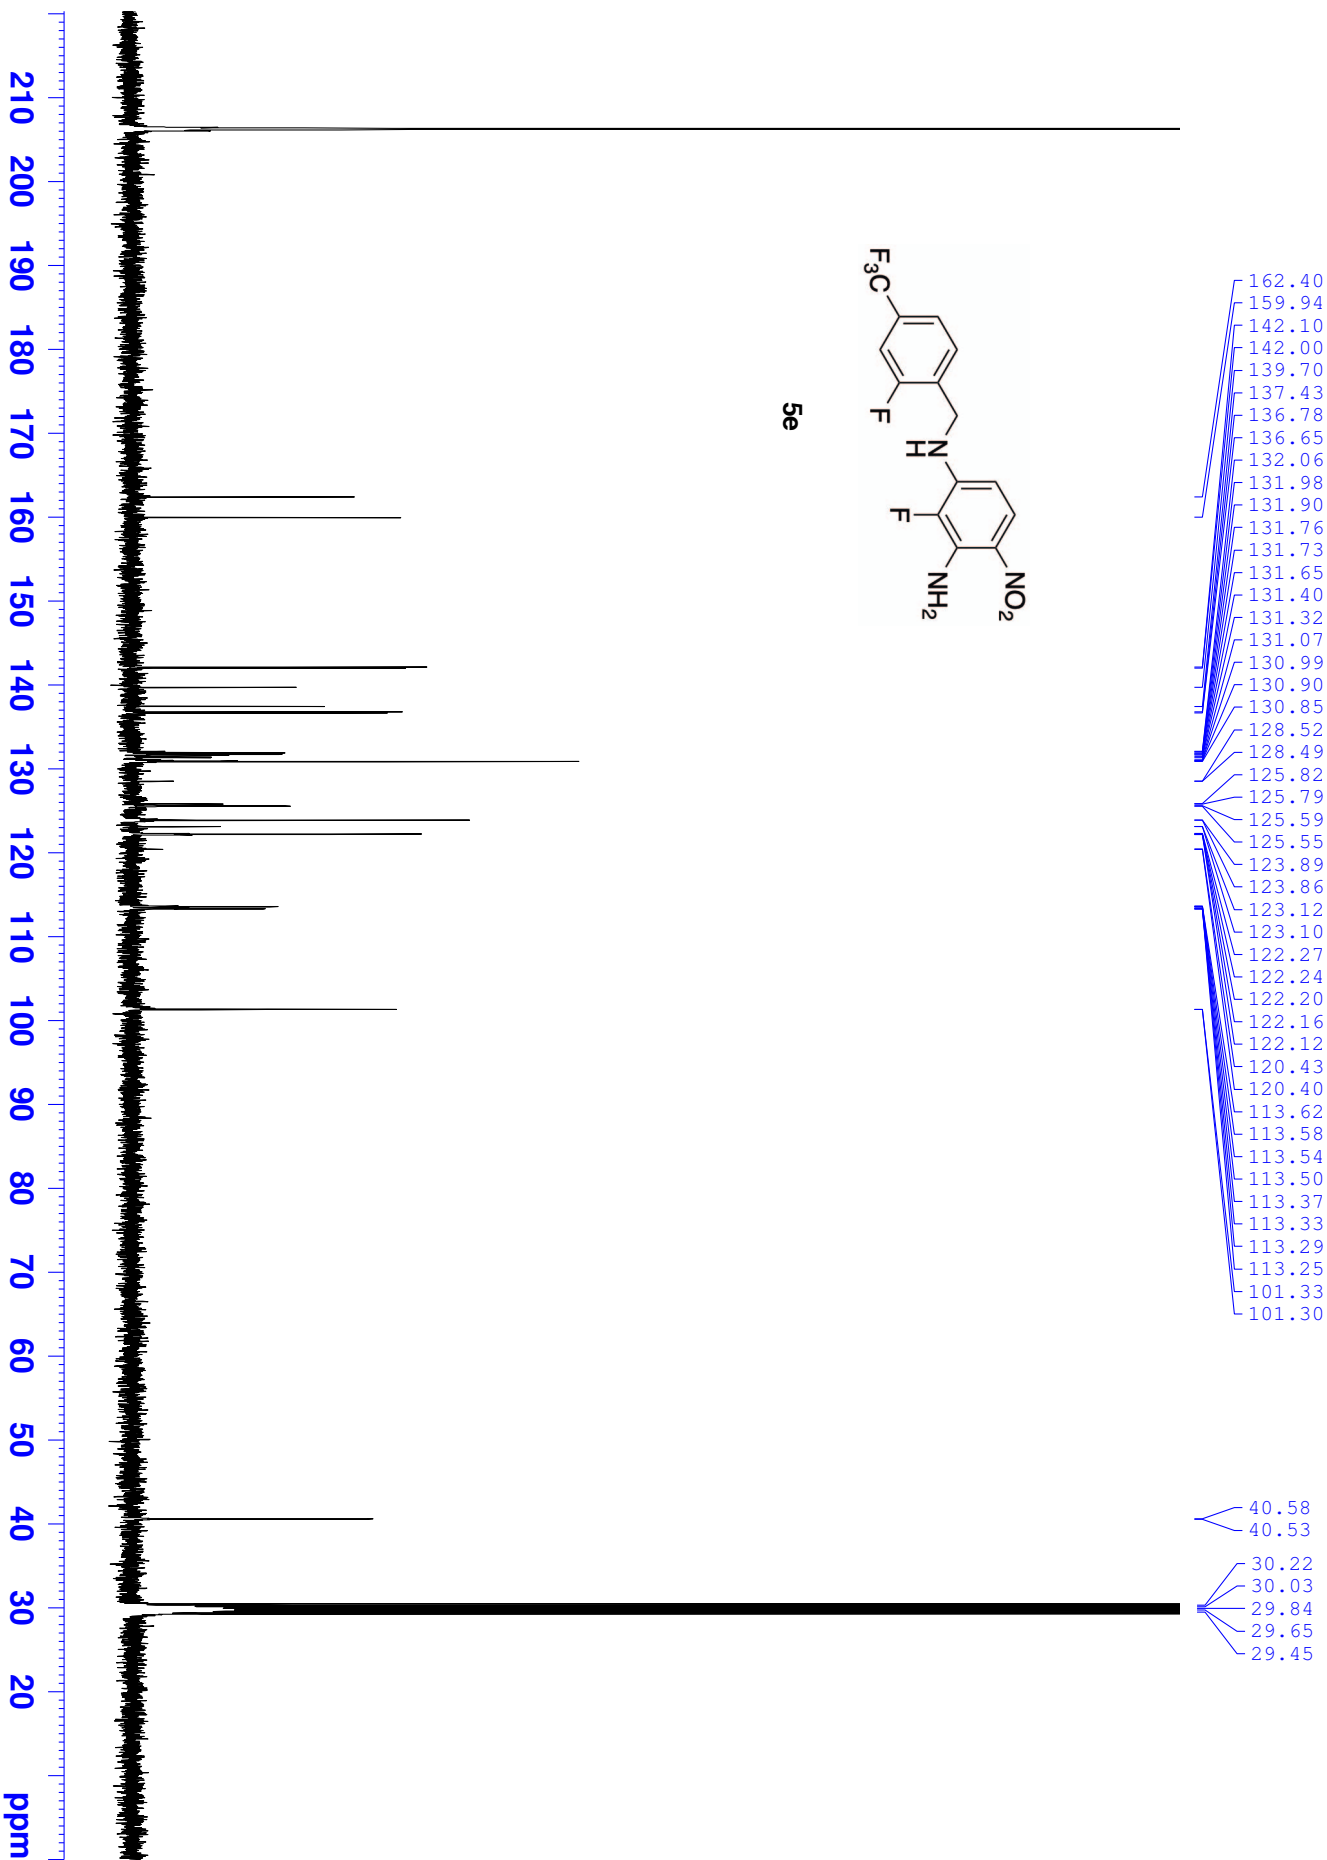

acetone-d6

RL702.018 CDCl3 500Mhz

CDCl3

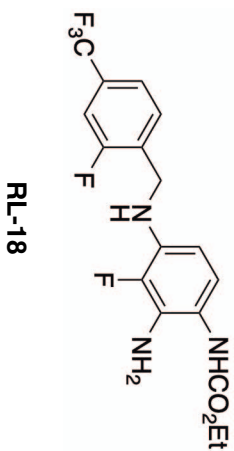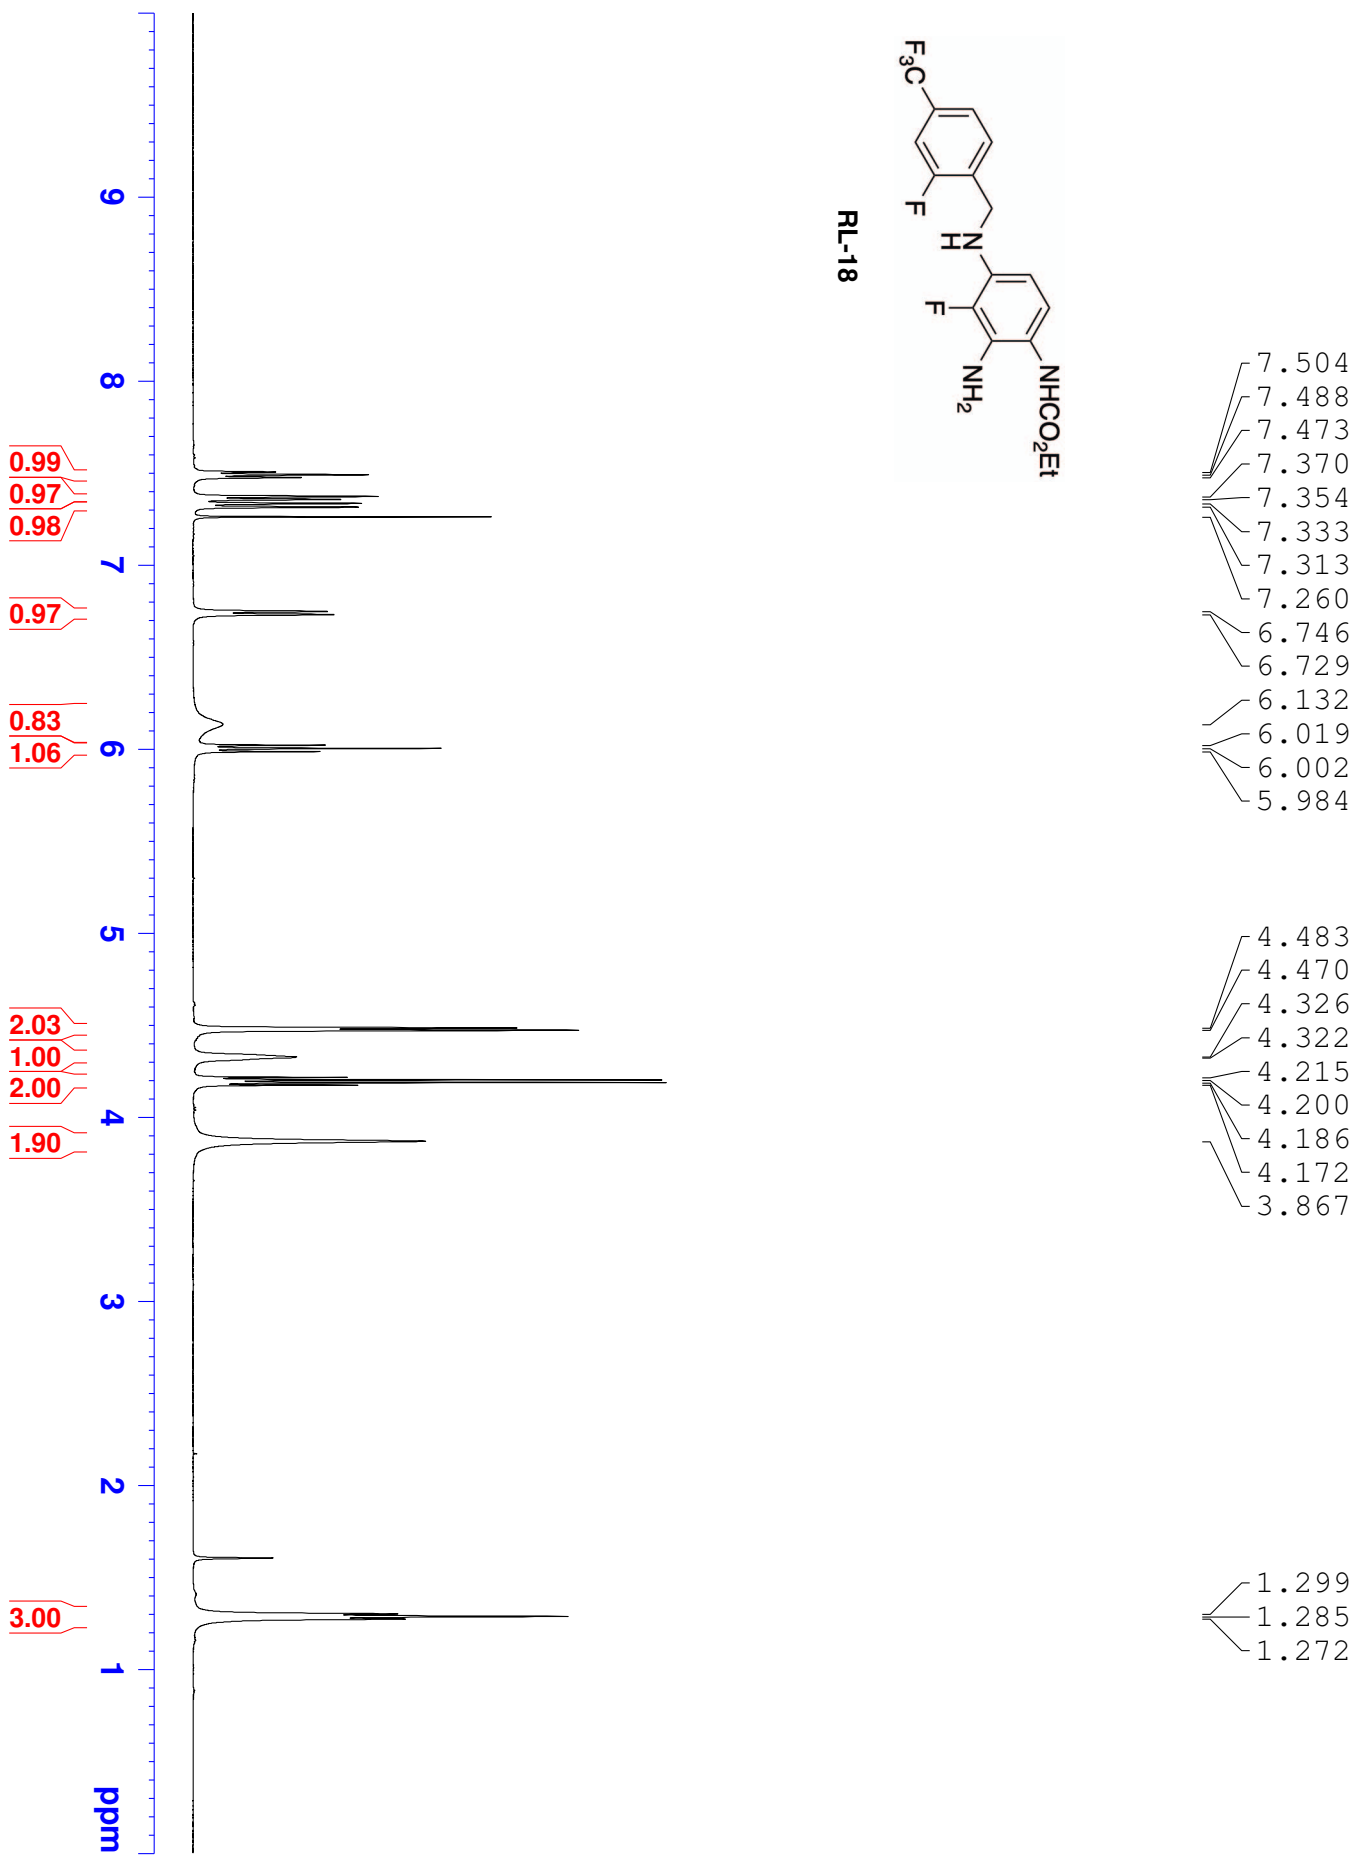

RL702.018 CDCl3 500MHz

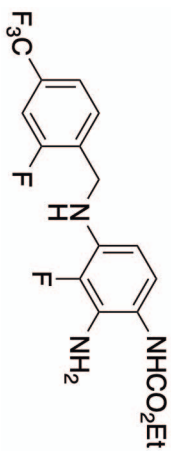

RL-18

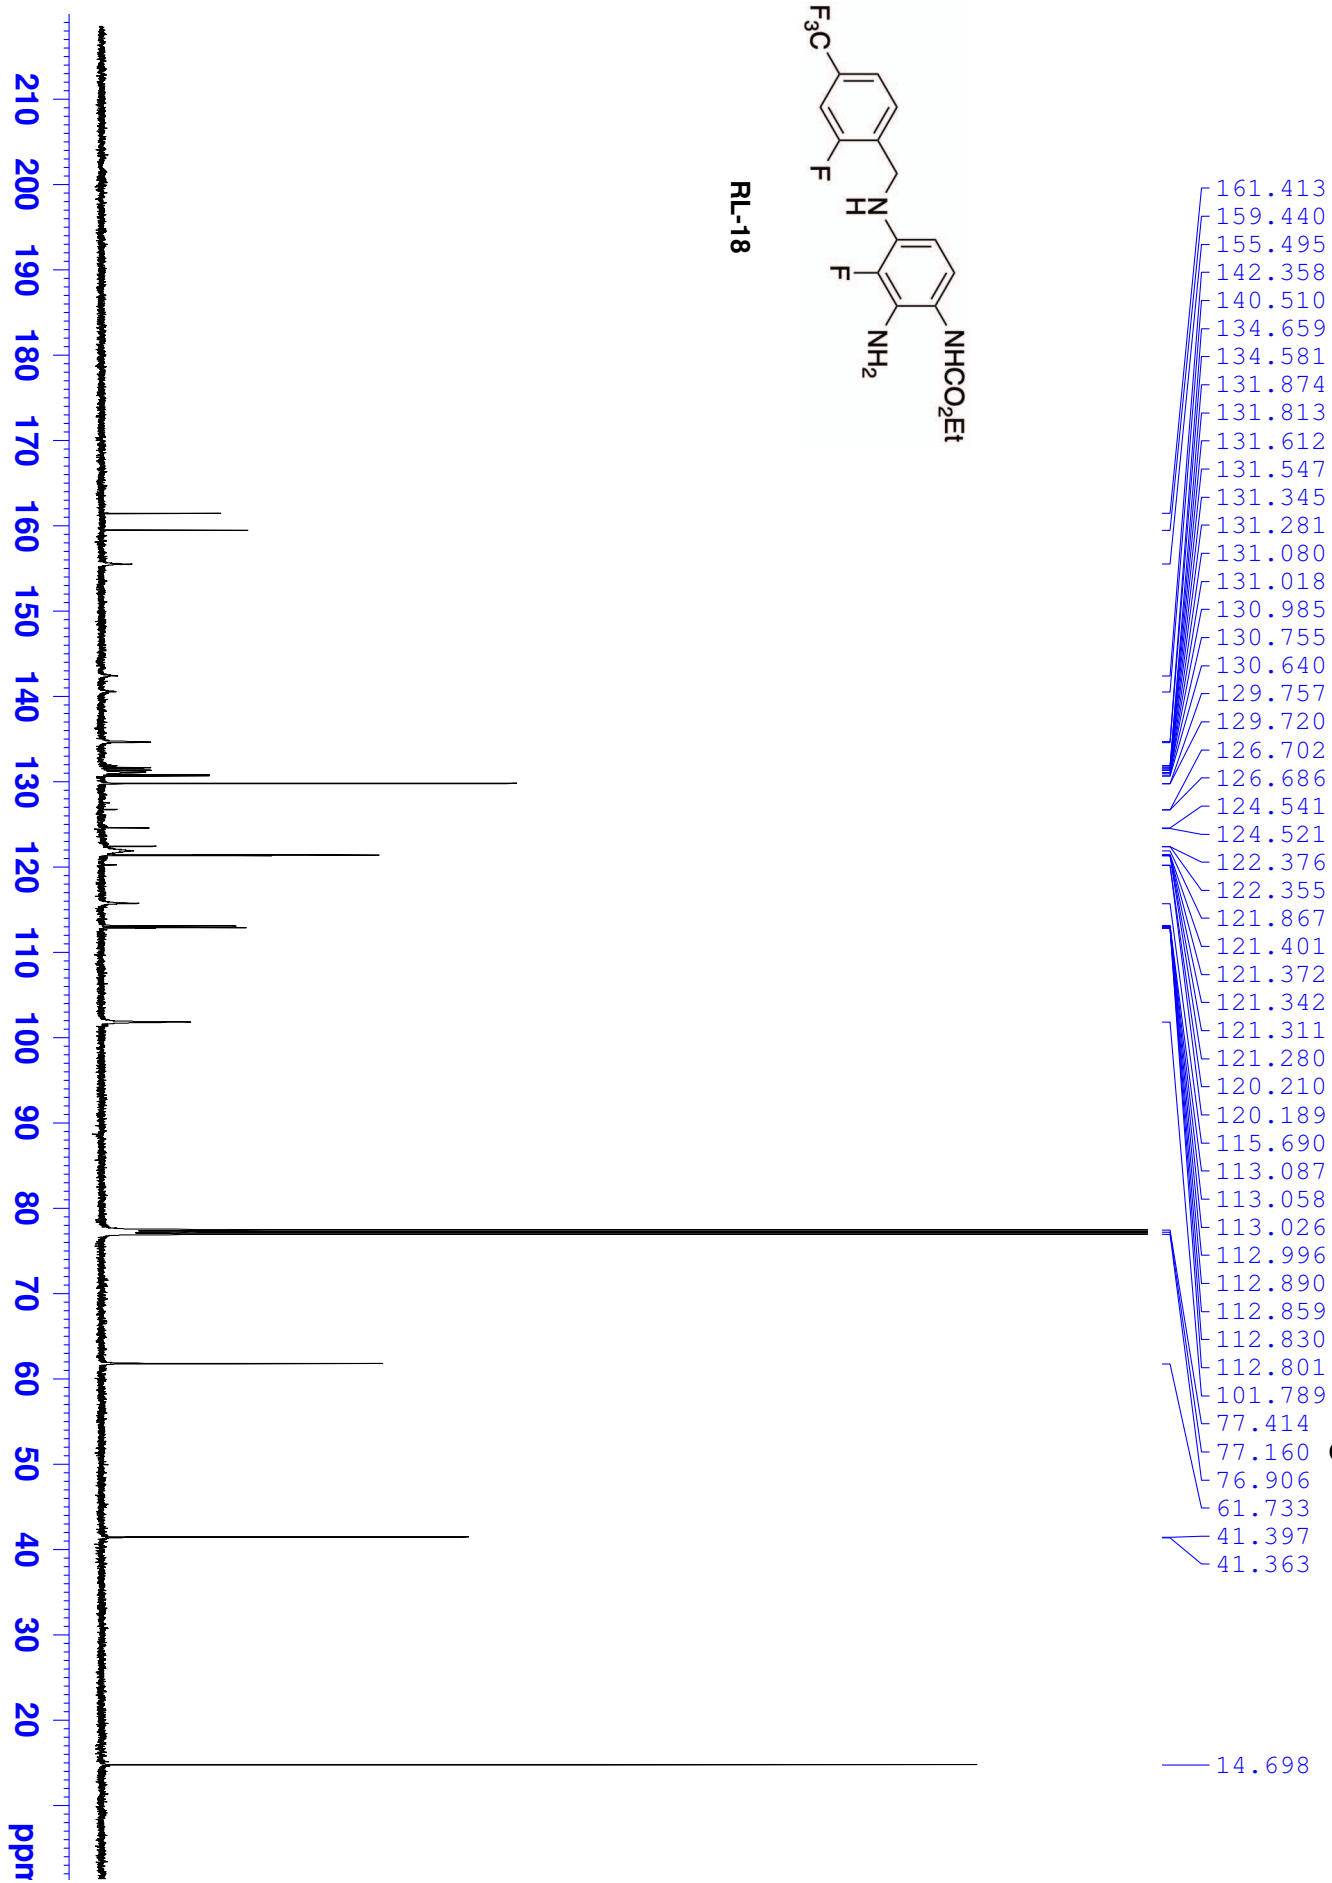

RL844.035 CDC13 400Mhz

CDC13

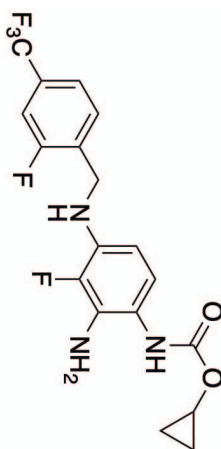

RL-35

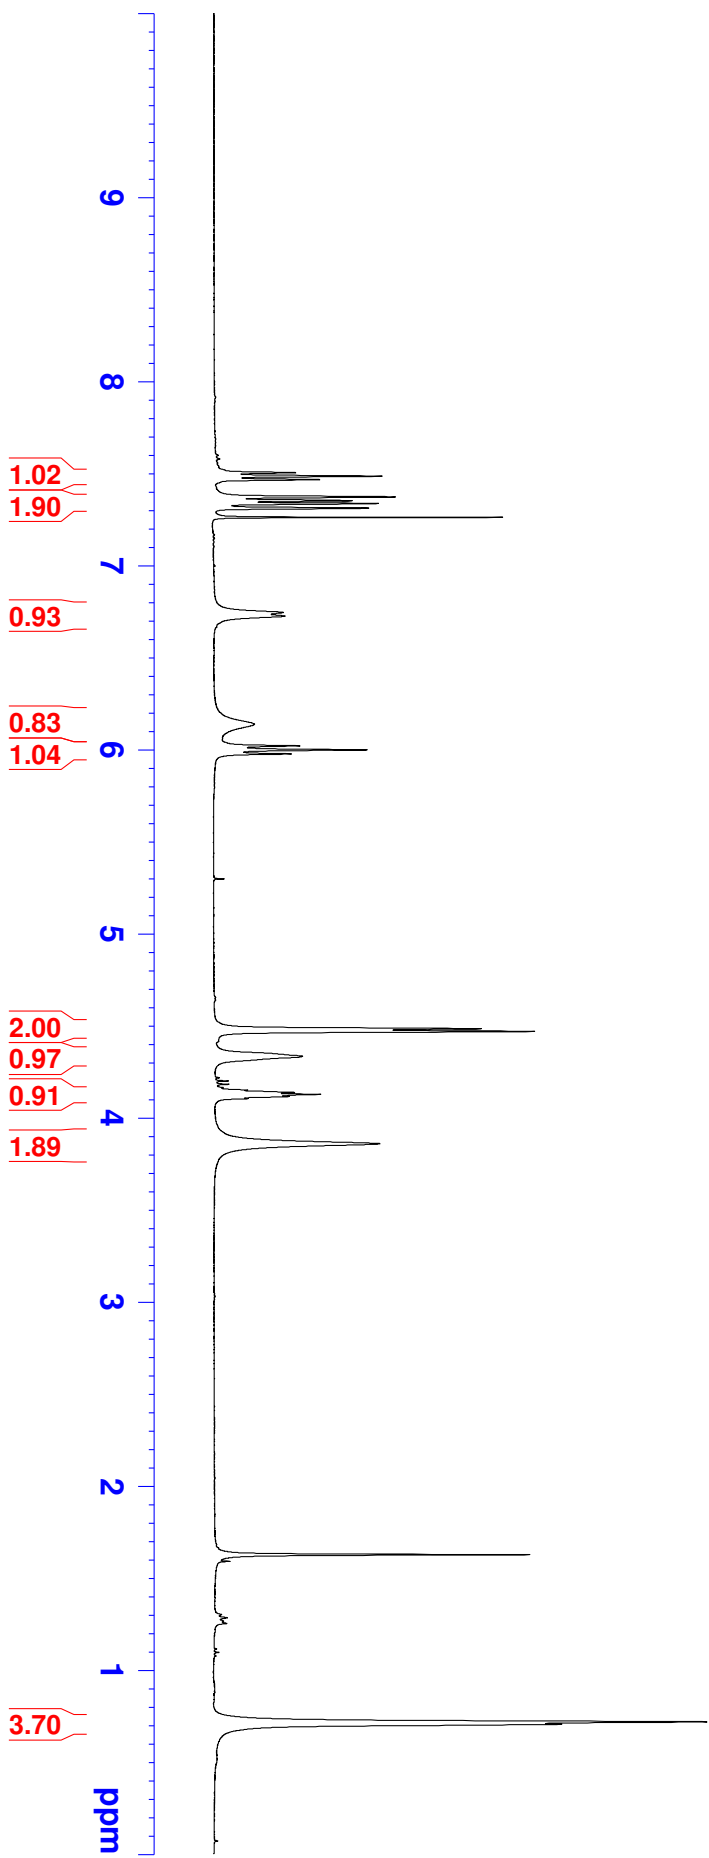

RL844.035 CDCl3 600MHz

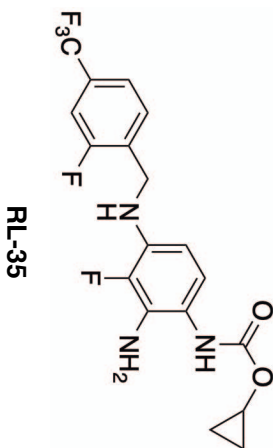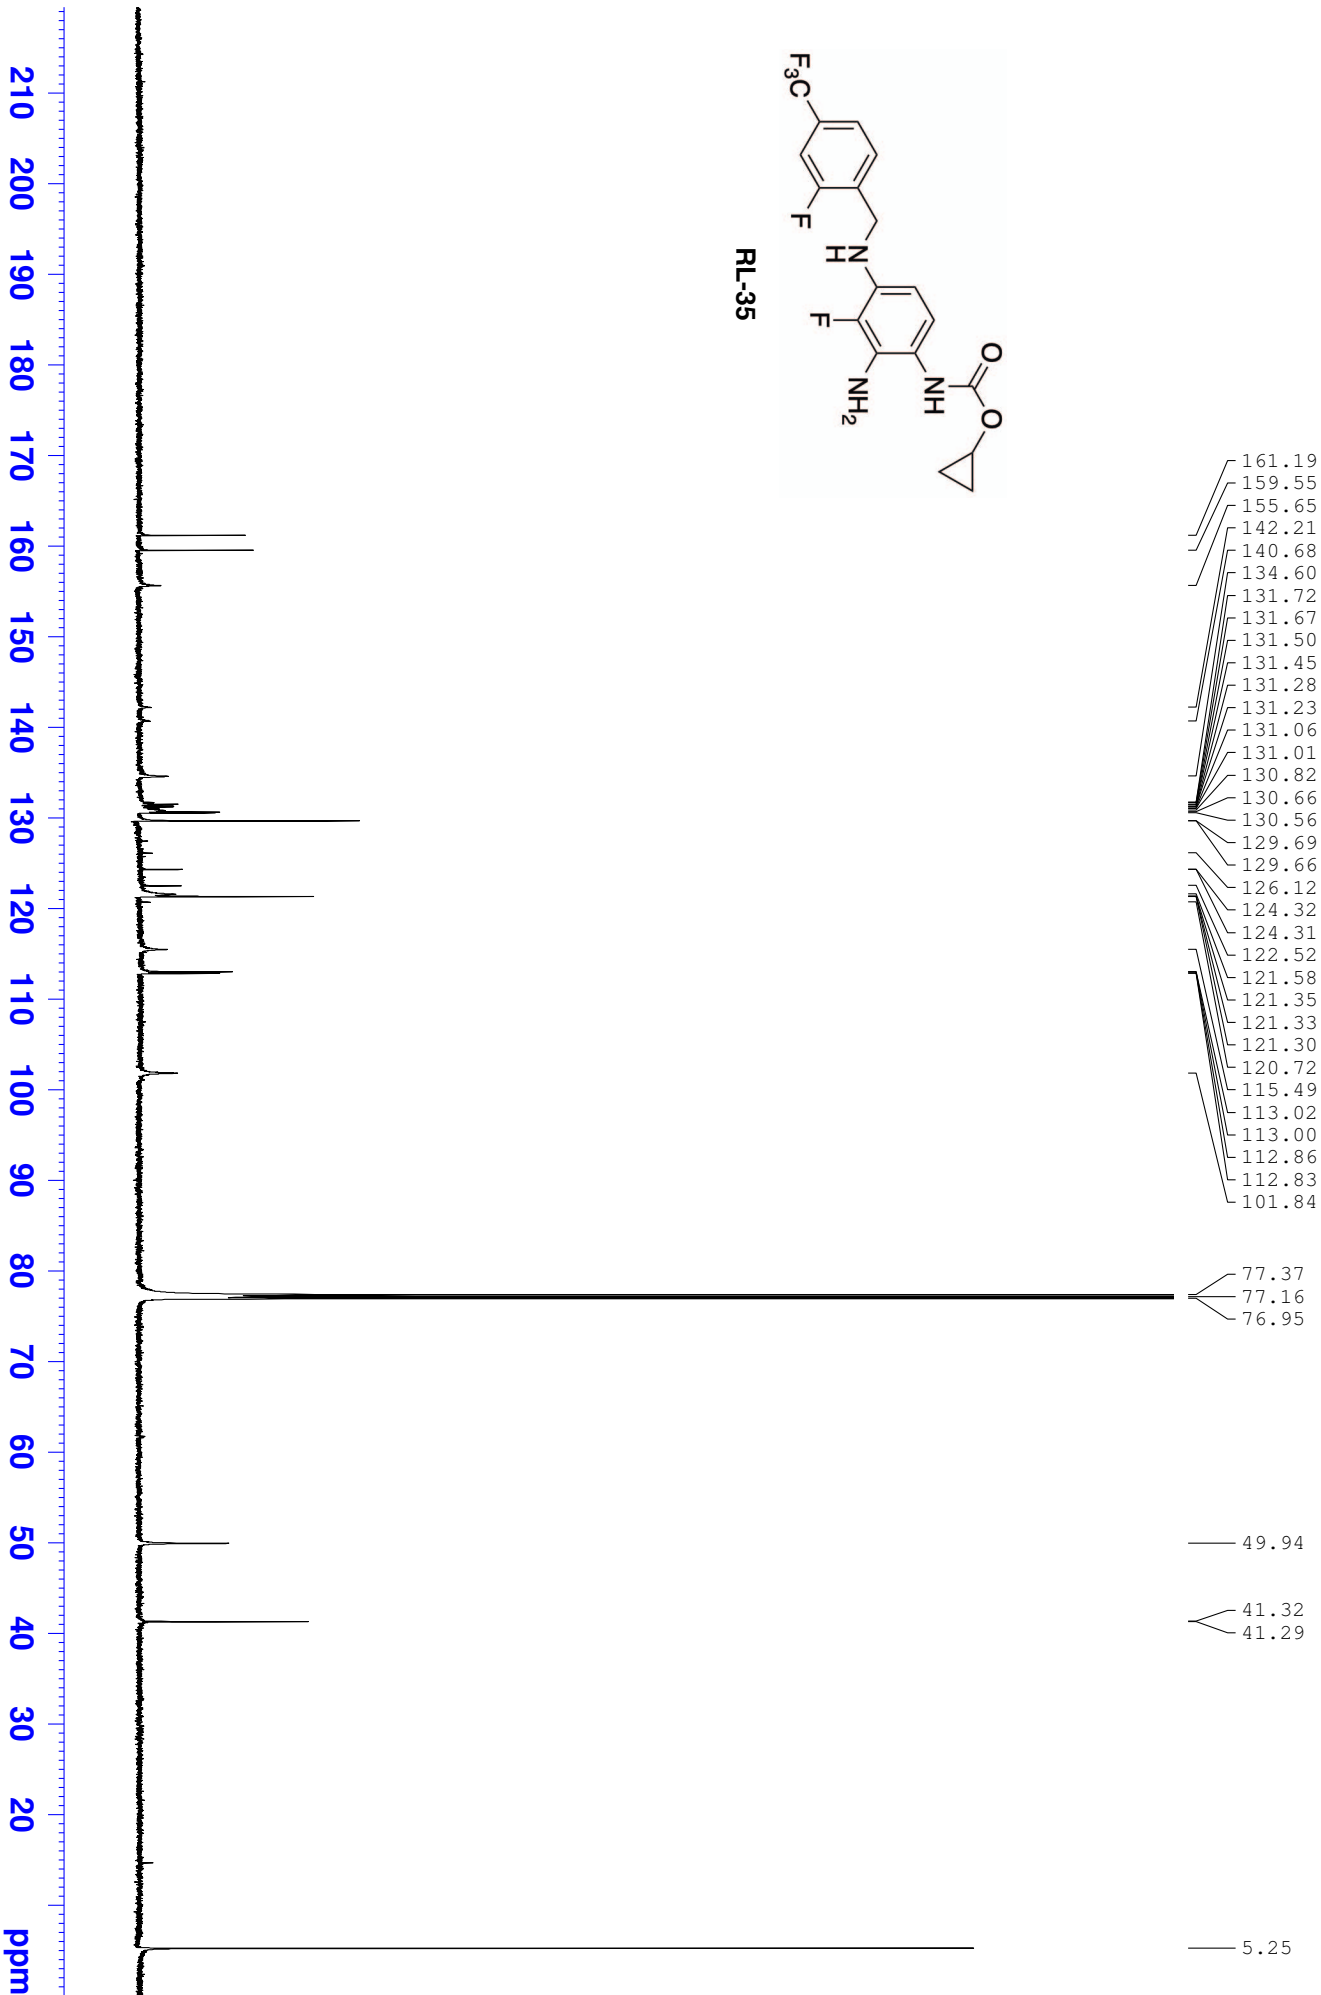



RL844.028 acetone-d6 400MHz

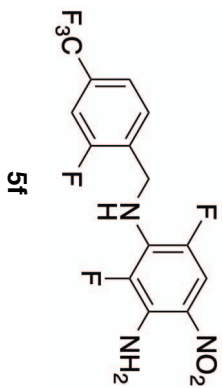

7.735  
7.716  
7.697  
7.612  
7.566  
7.542  
7.505

6.761  
6.475

4.882  
4.865

2.056  
2.050  
2.045

acetone-d6

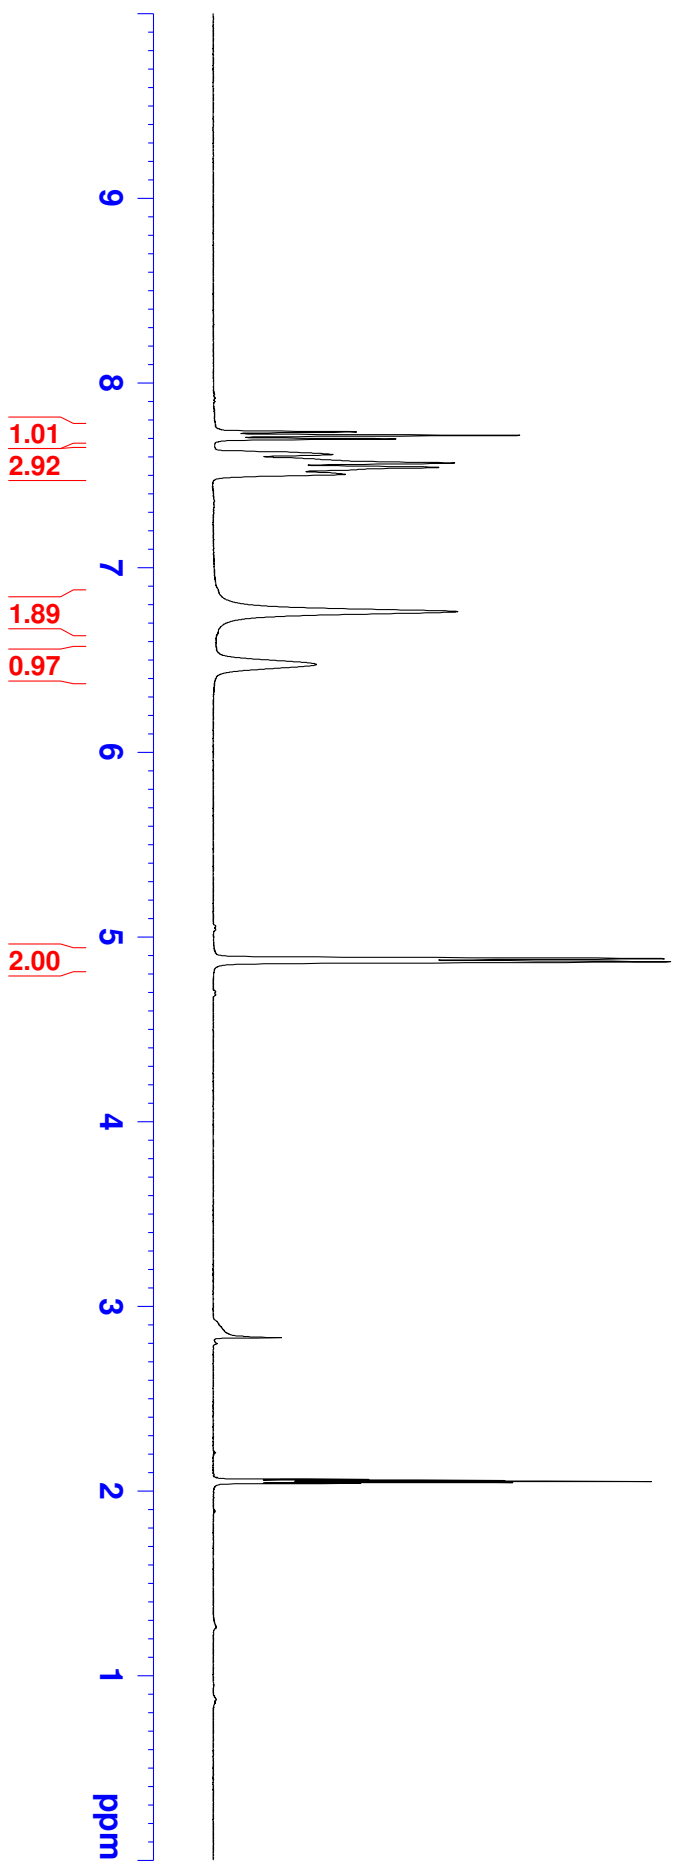

RI844.028 acetone-d6 400Mhz

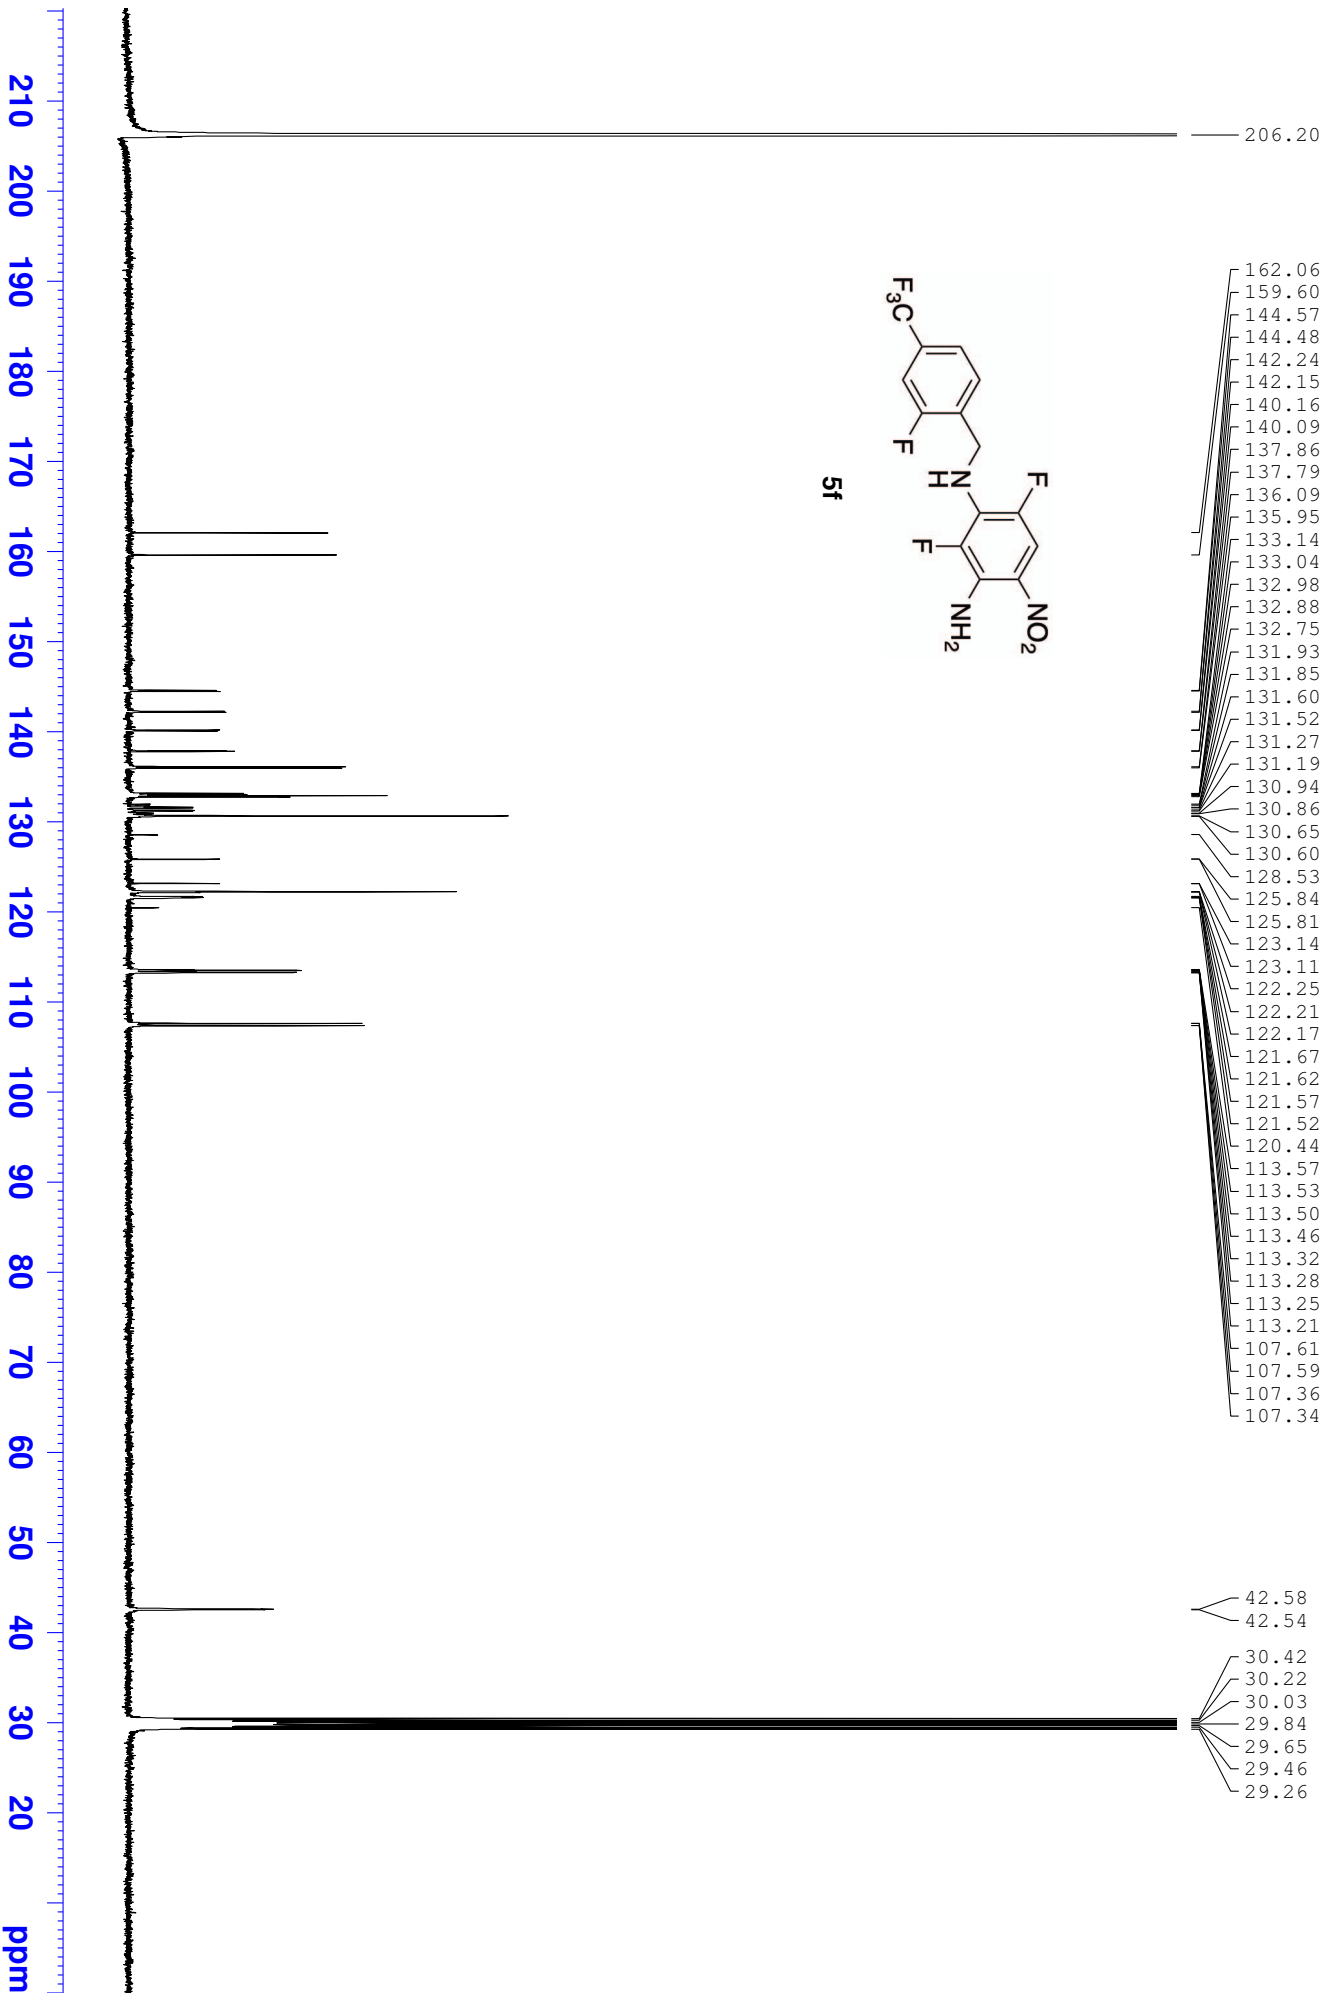

RL844.036 CDCl<sub>3</sub> 500MHzCDCl<sub>3</sub>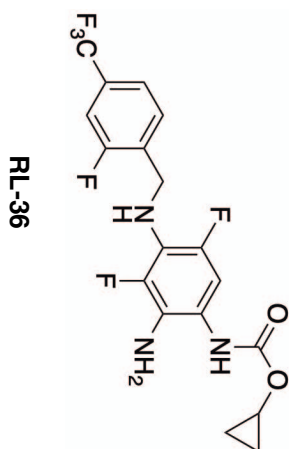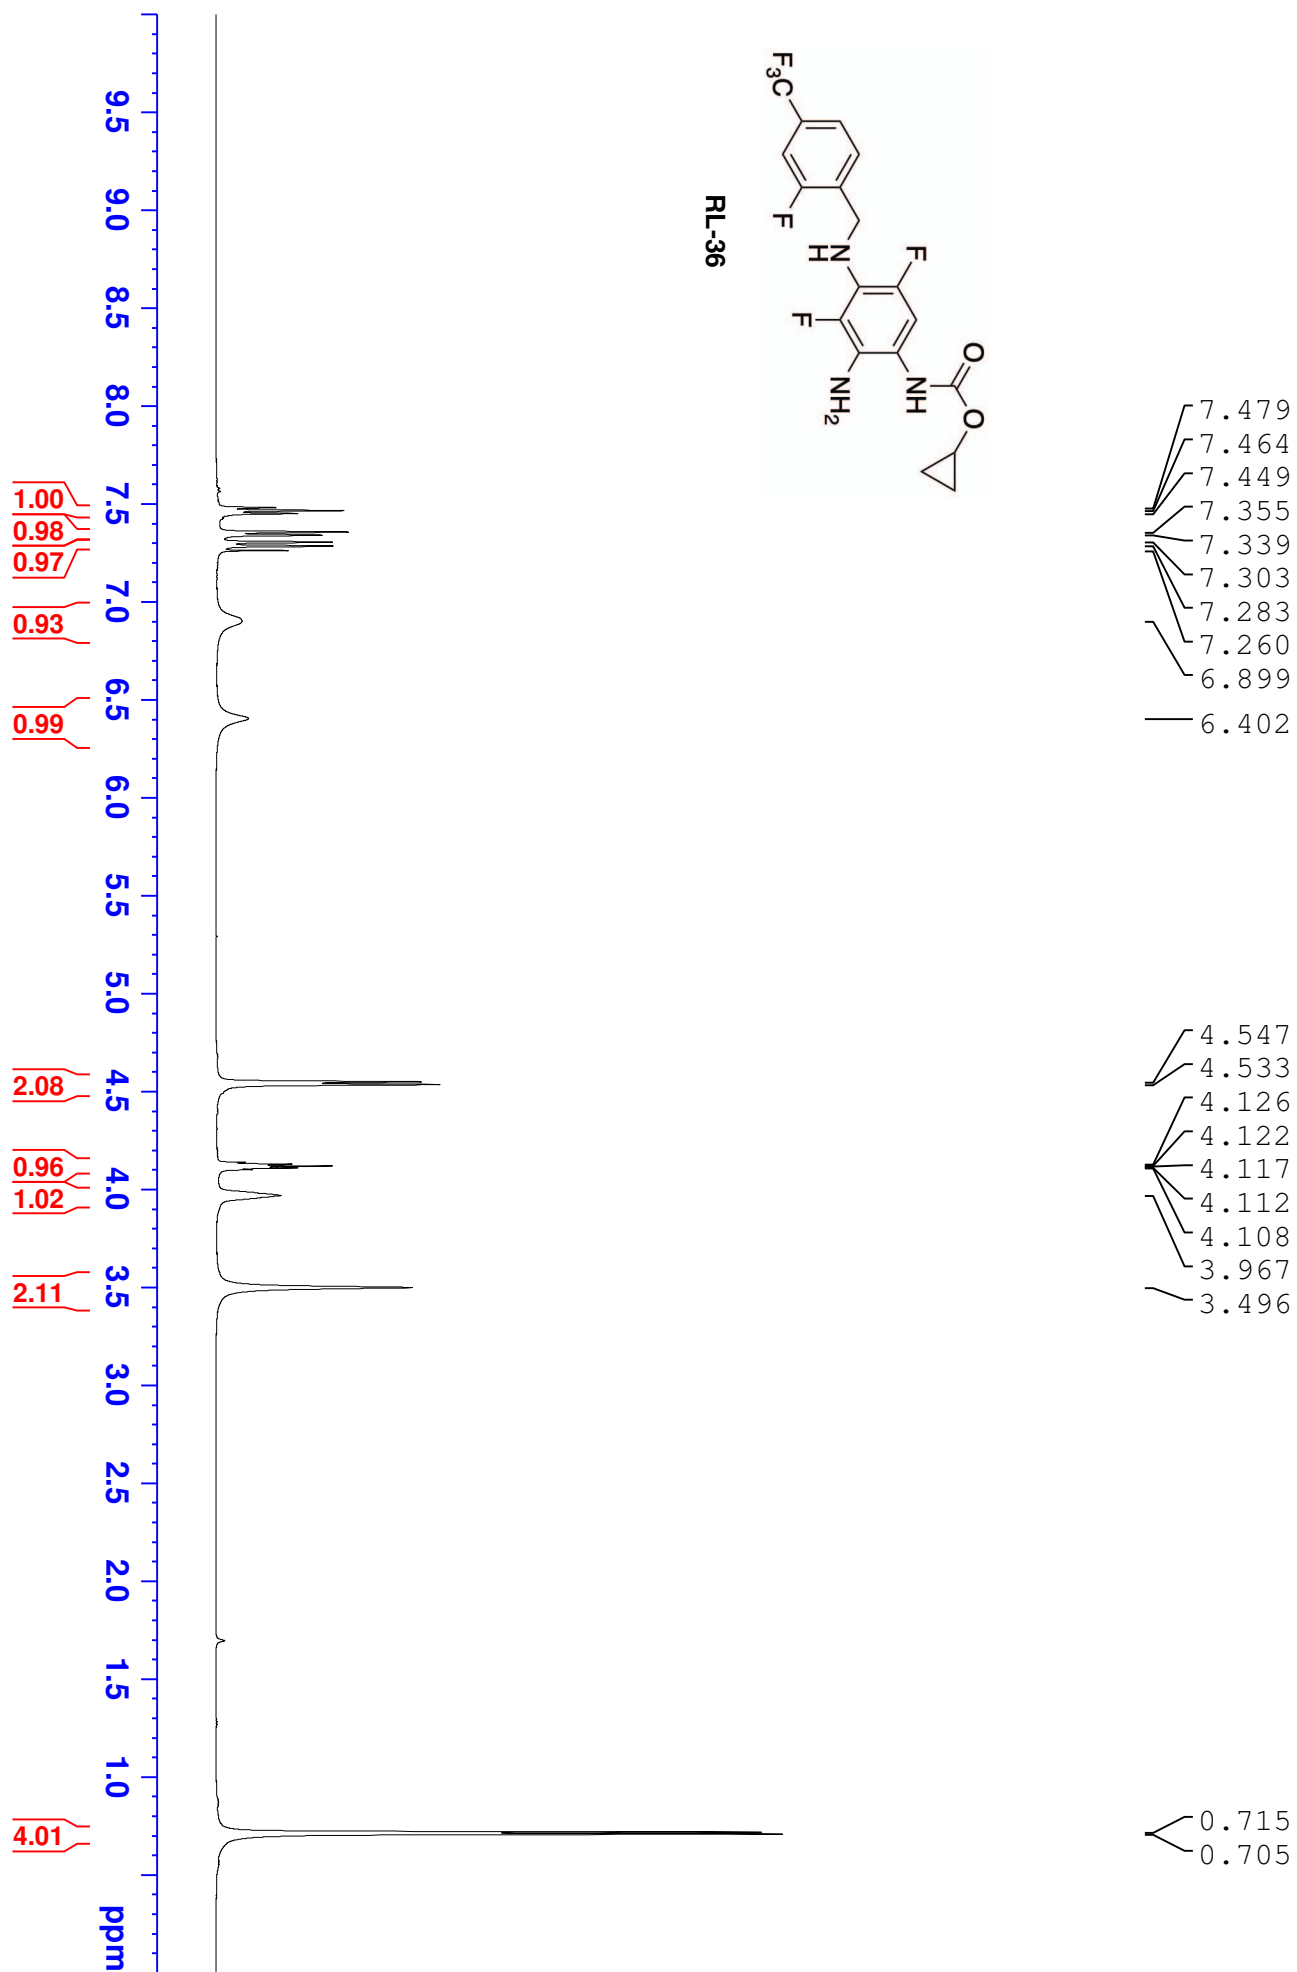

RL844.036 CDCl3 500MHz

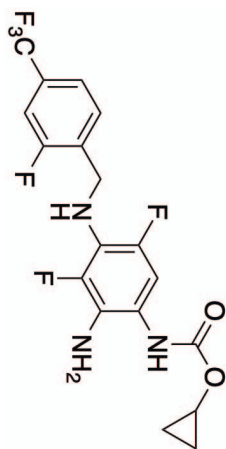

RL-36

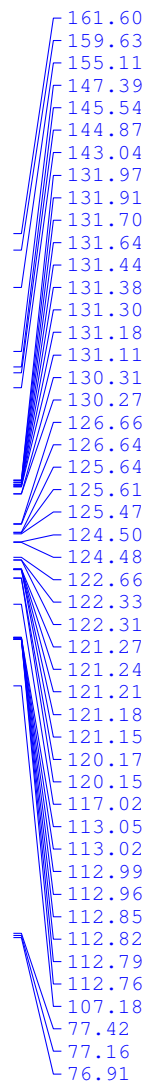

CDCl3

50.02  
44.26  
44.23131.97  
131.91  
131.70  
131.64  
131.44  
131.38  
131.30  
131.18  
131.11  
130.31  
130.27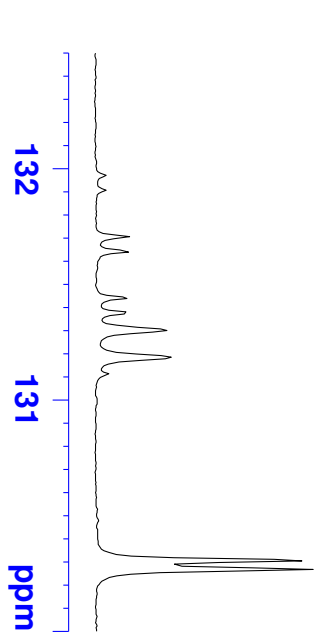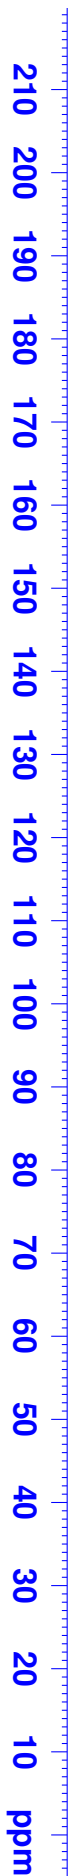

5.14

CDCl3

- 7.260
- 6.394
- 6.380
- 6.374
- 6.371
- 6.360
- 6.358
- 6.351
- 6.338
- 6.036

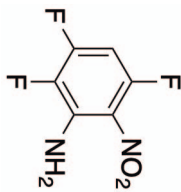

4d

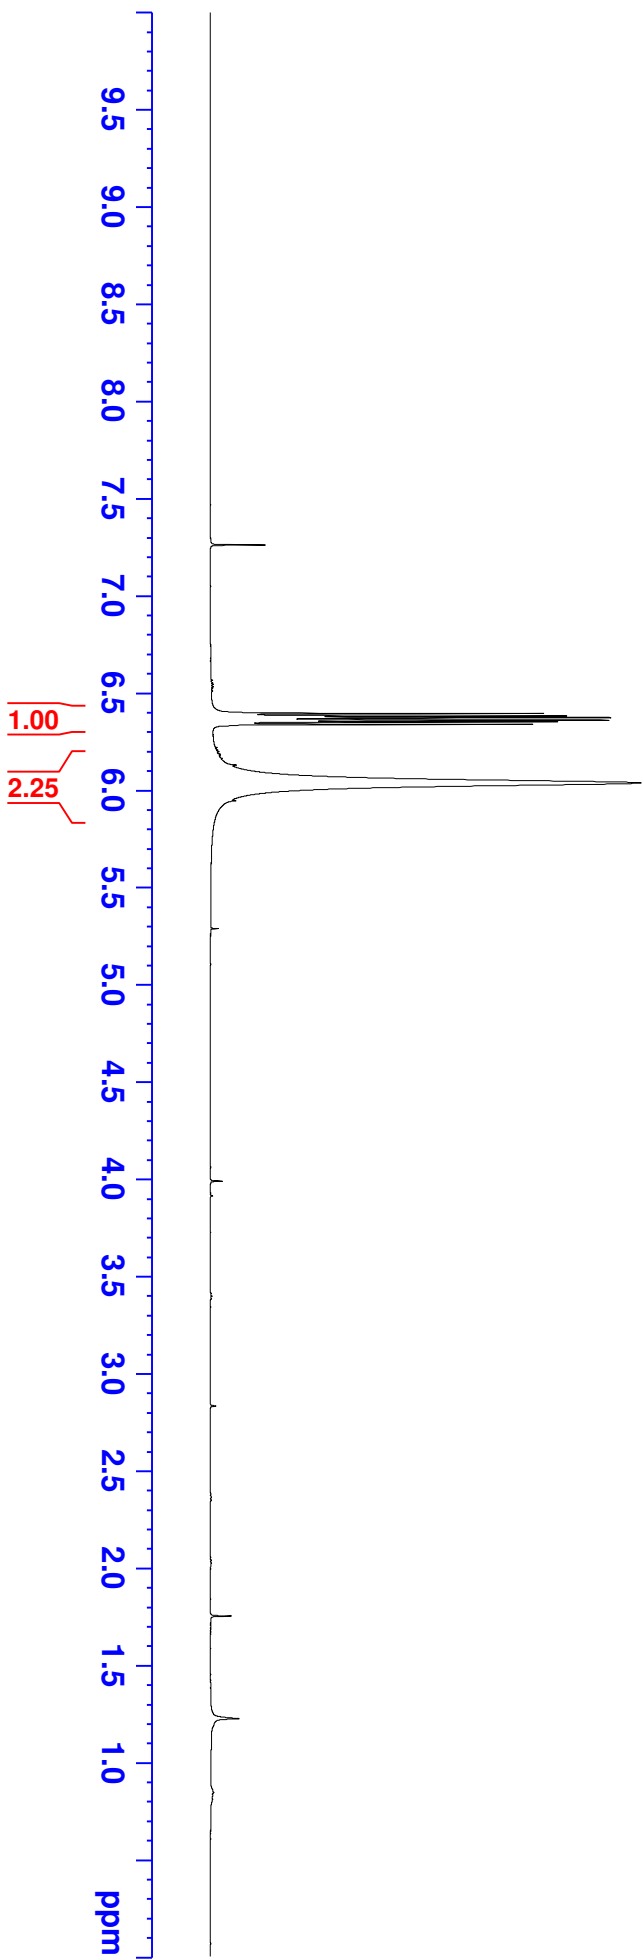

RI844.040 CDCl3 500MHz

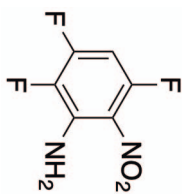

4d

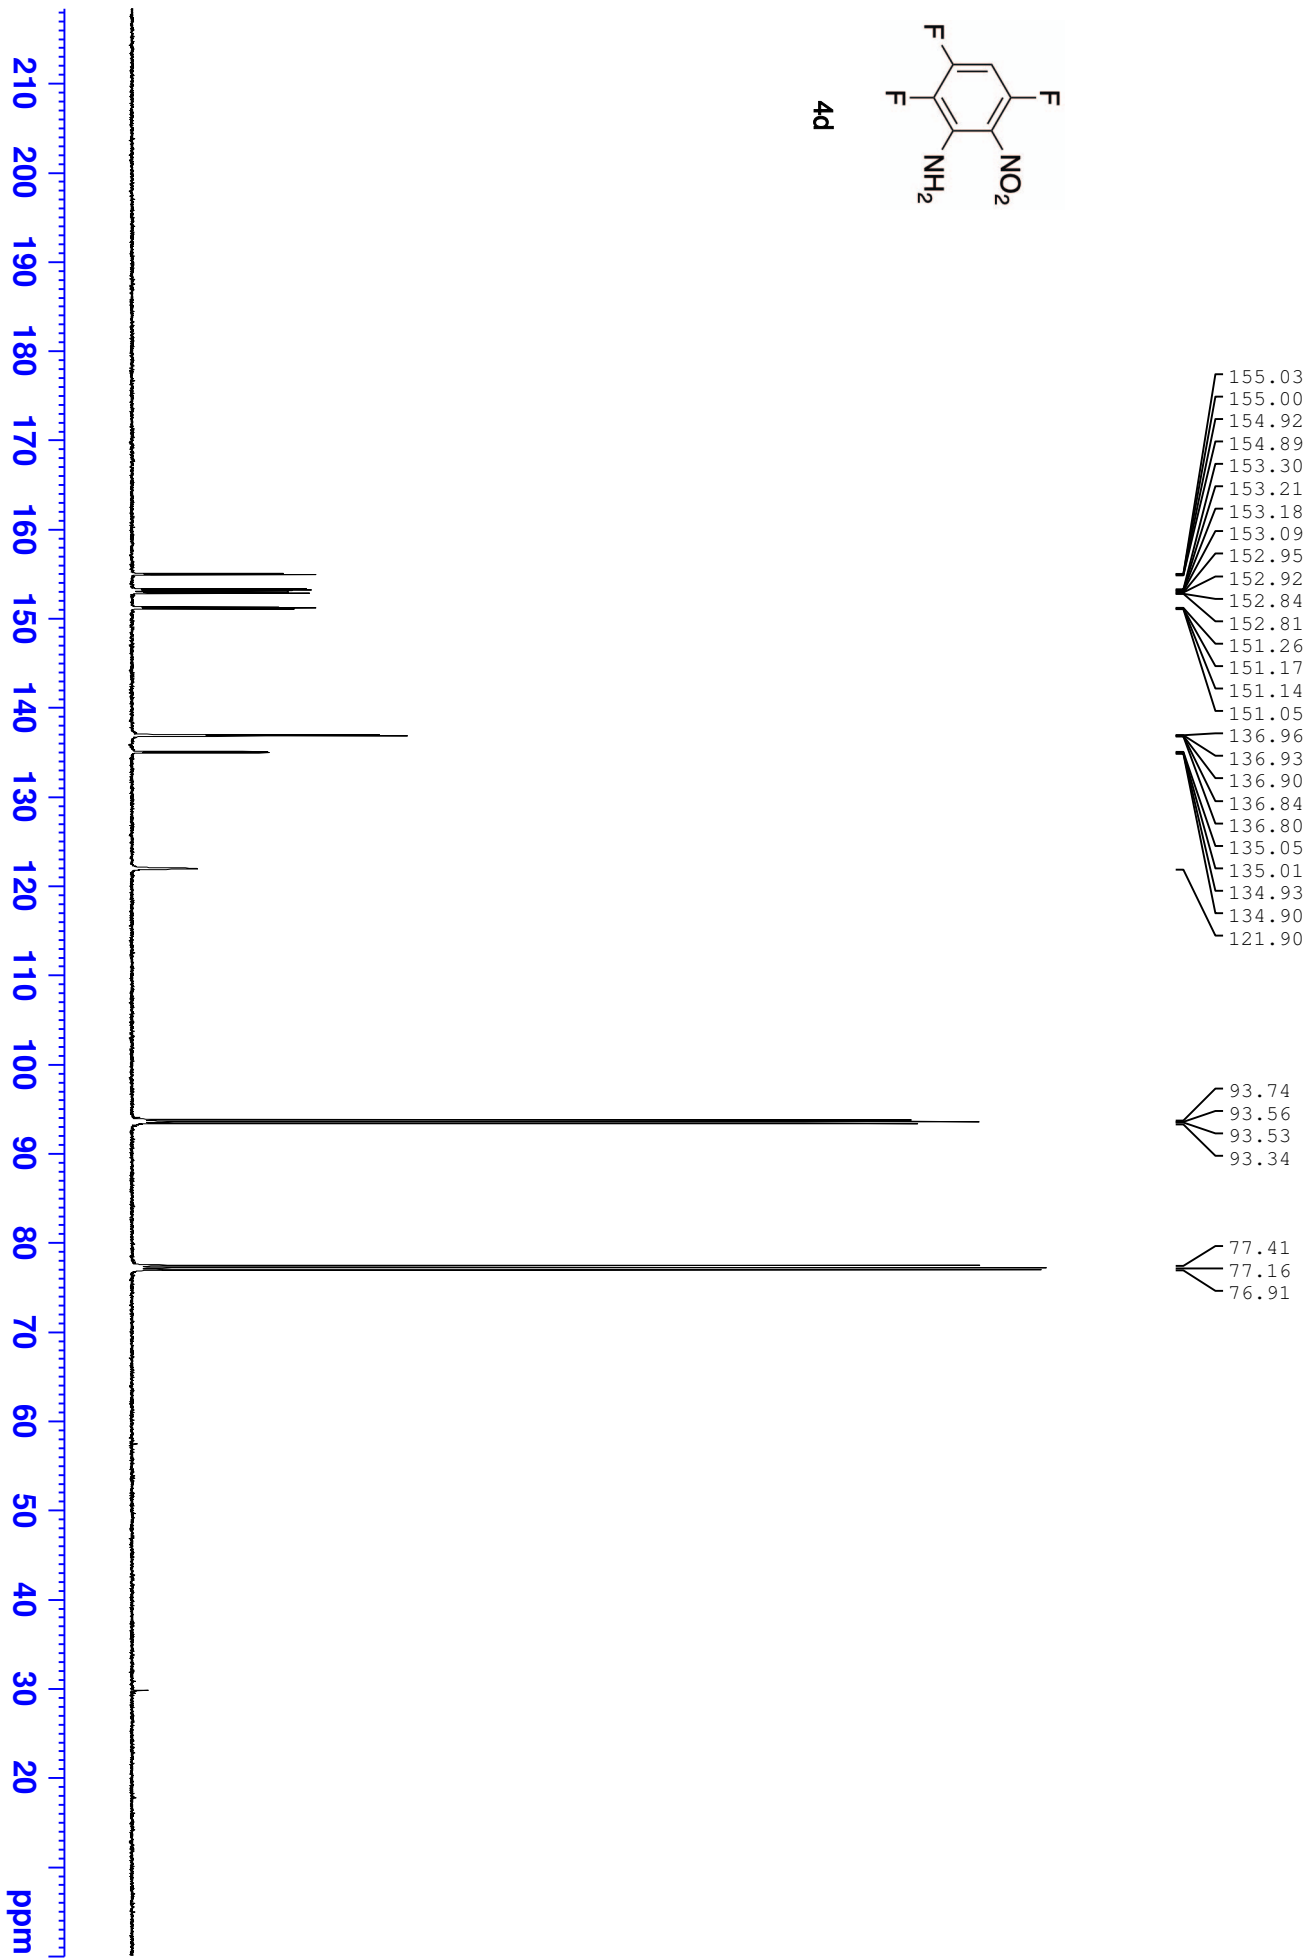

CDCl3

RL844.037 CDCl3 600Mhz

CDCl3

7.452  
7.439  
7.428  
7.414  
7.385  
7.368  
7.260

5.919  
5.868  
5.856  
5.845  
5.833

5.016

4.551  
4.540

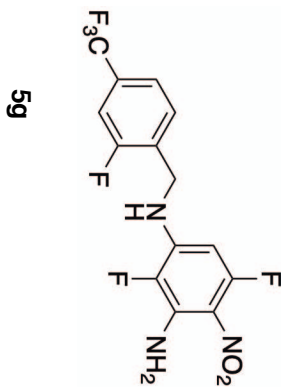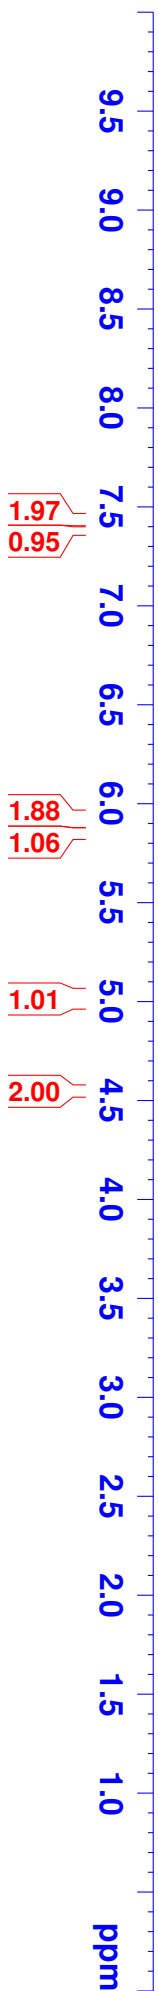

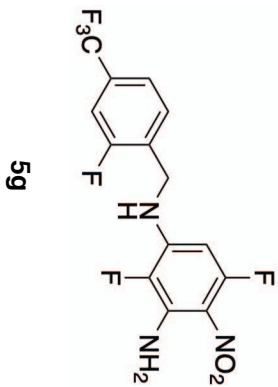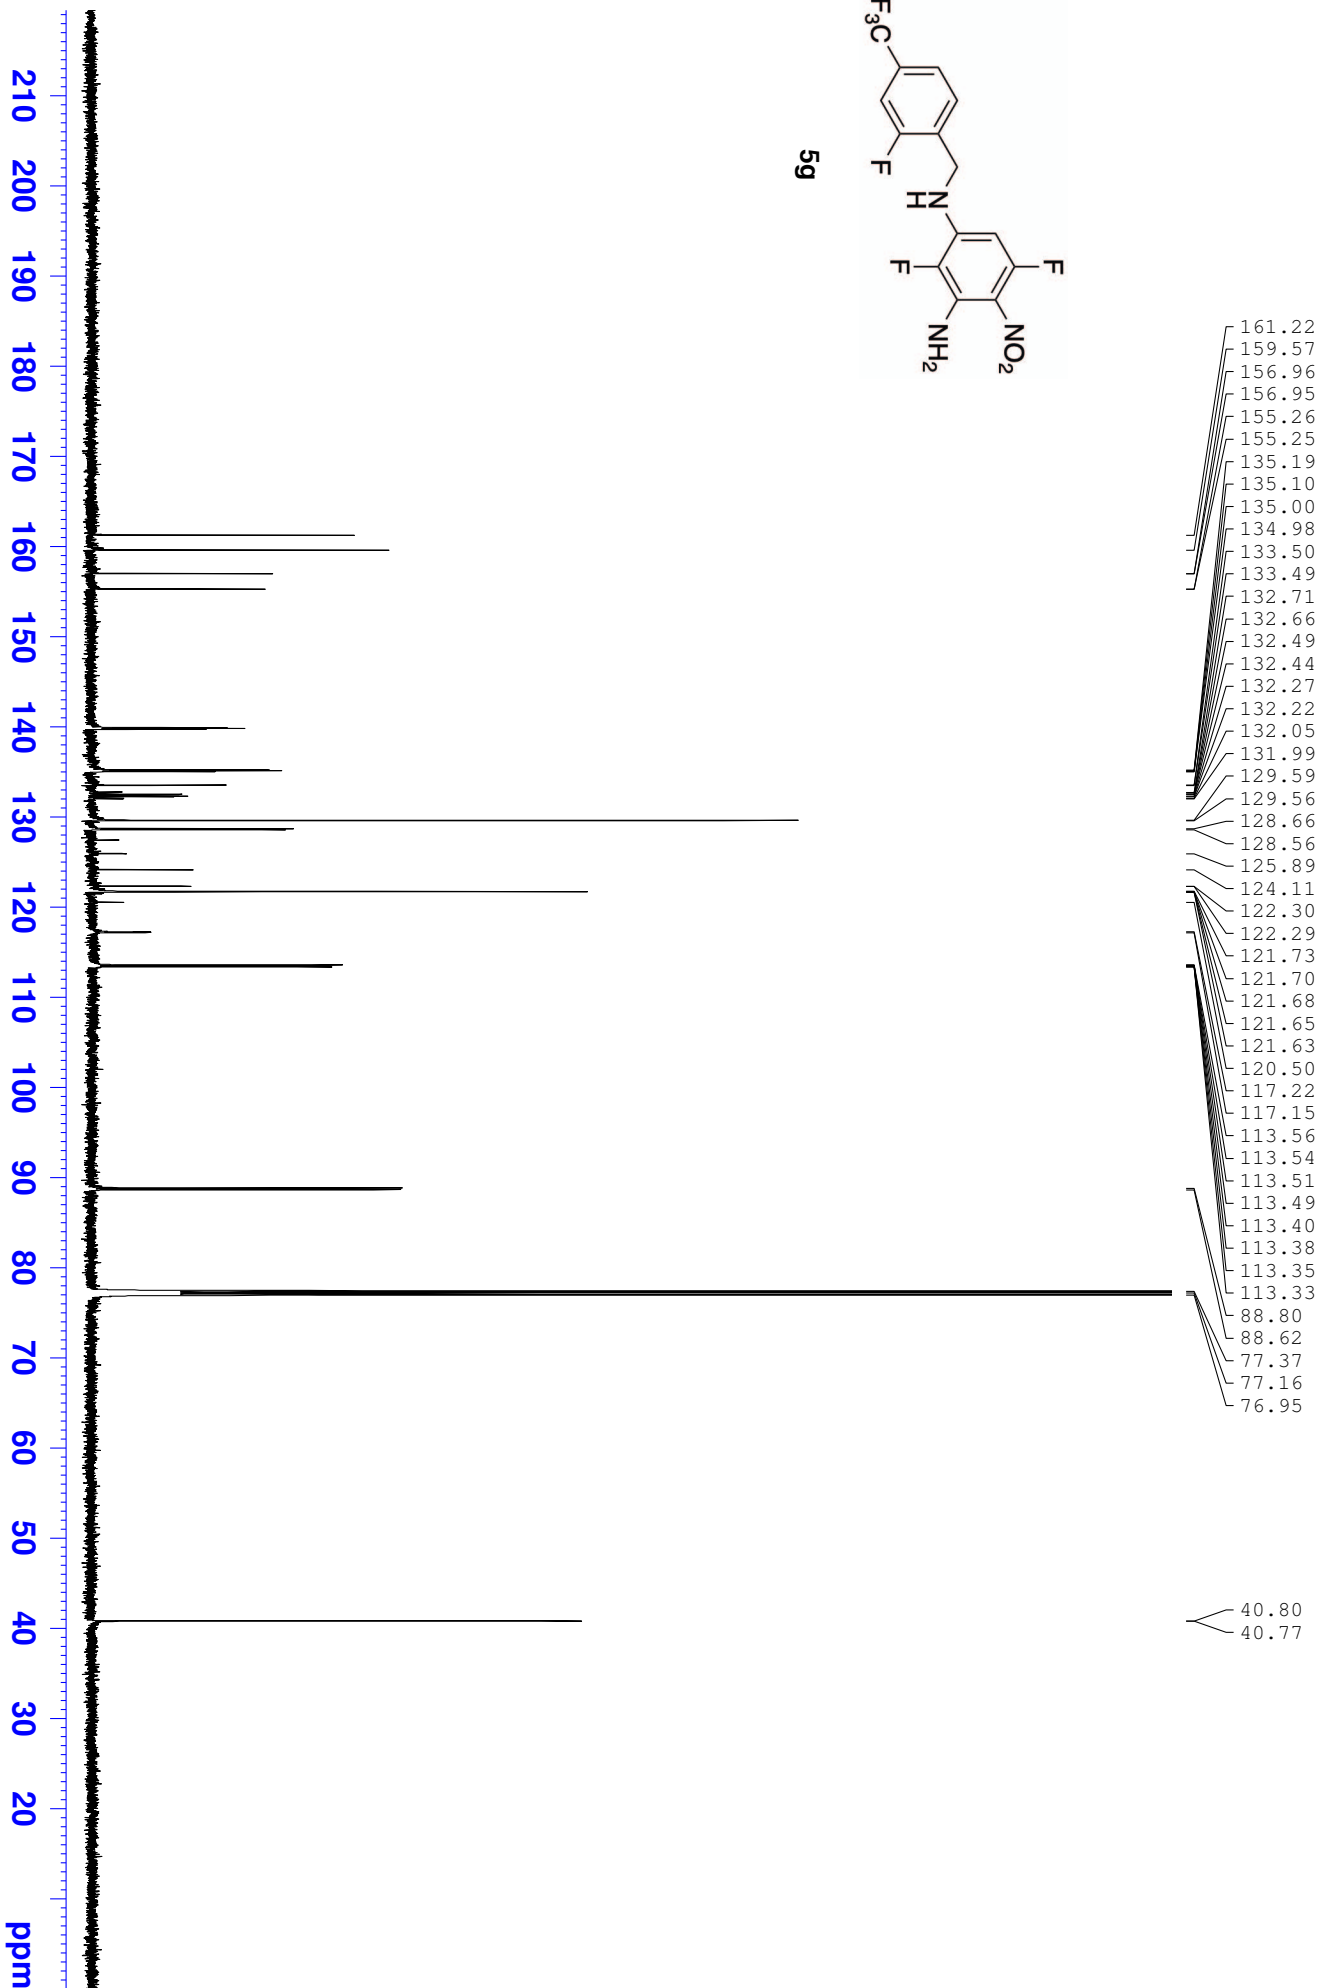

CDCl3



RL844.046 DMSO 353 K 400Mhz

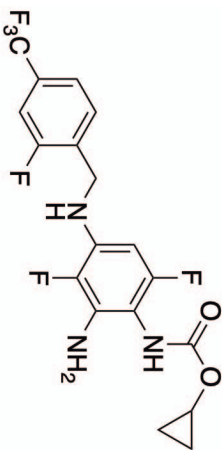

RL-46

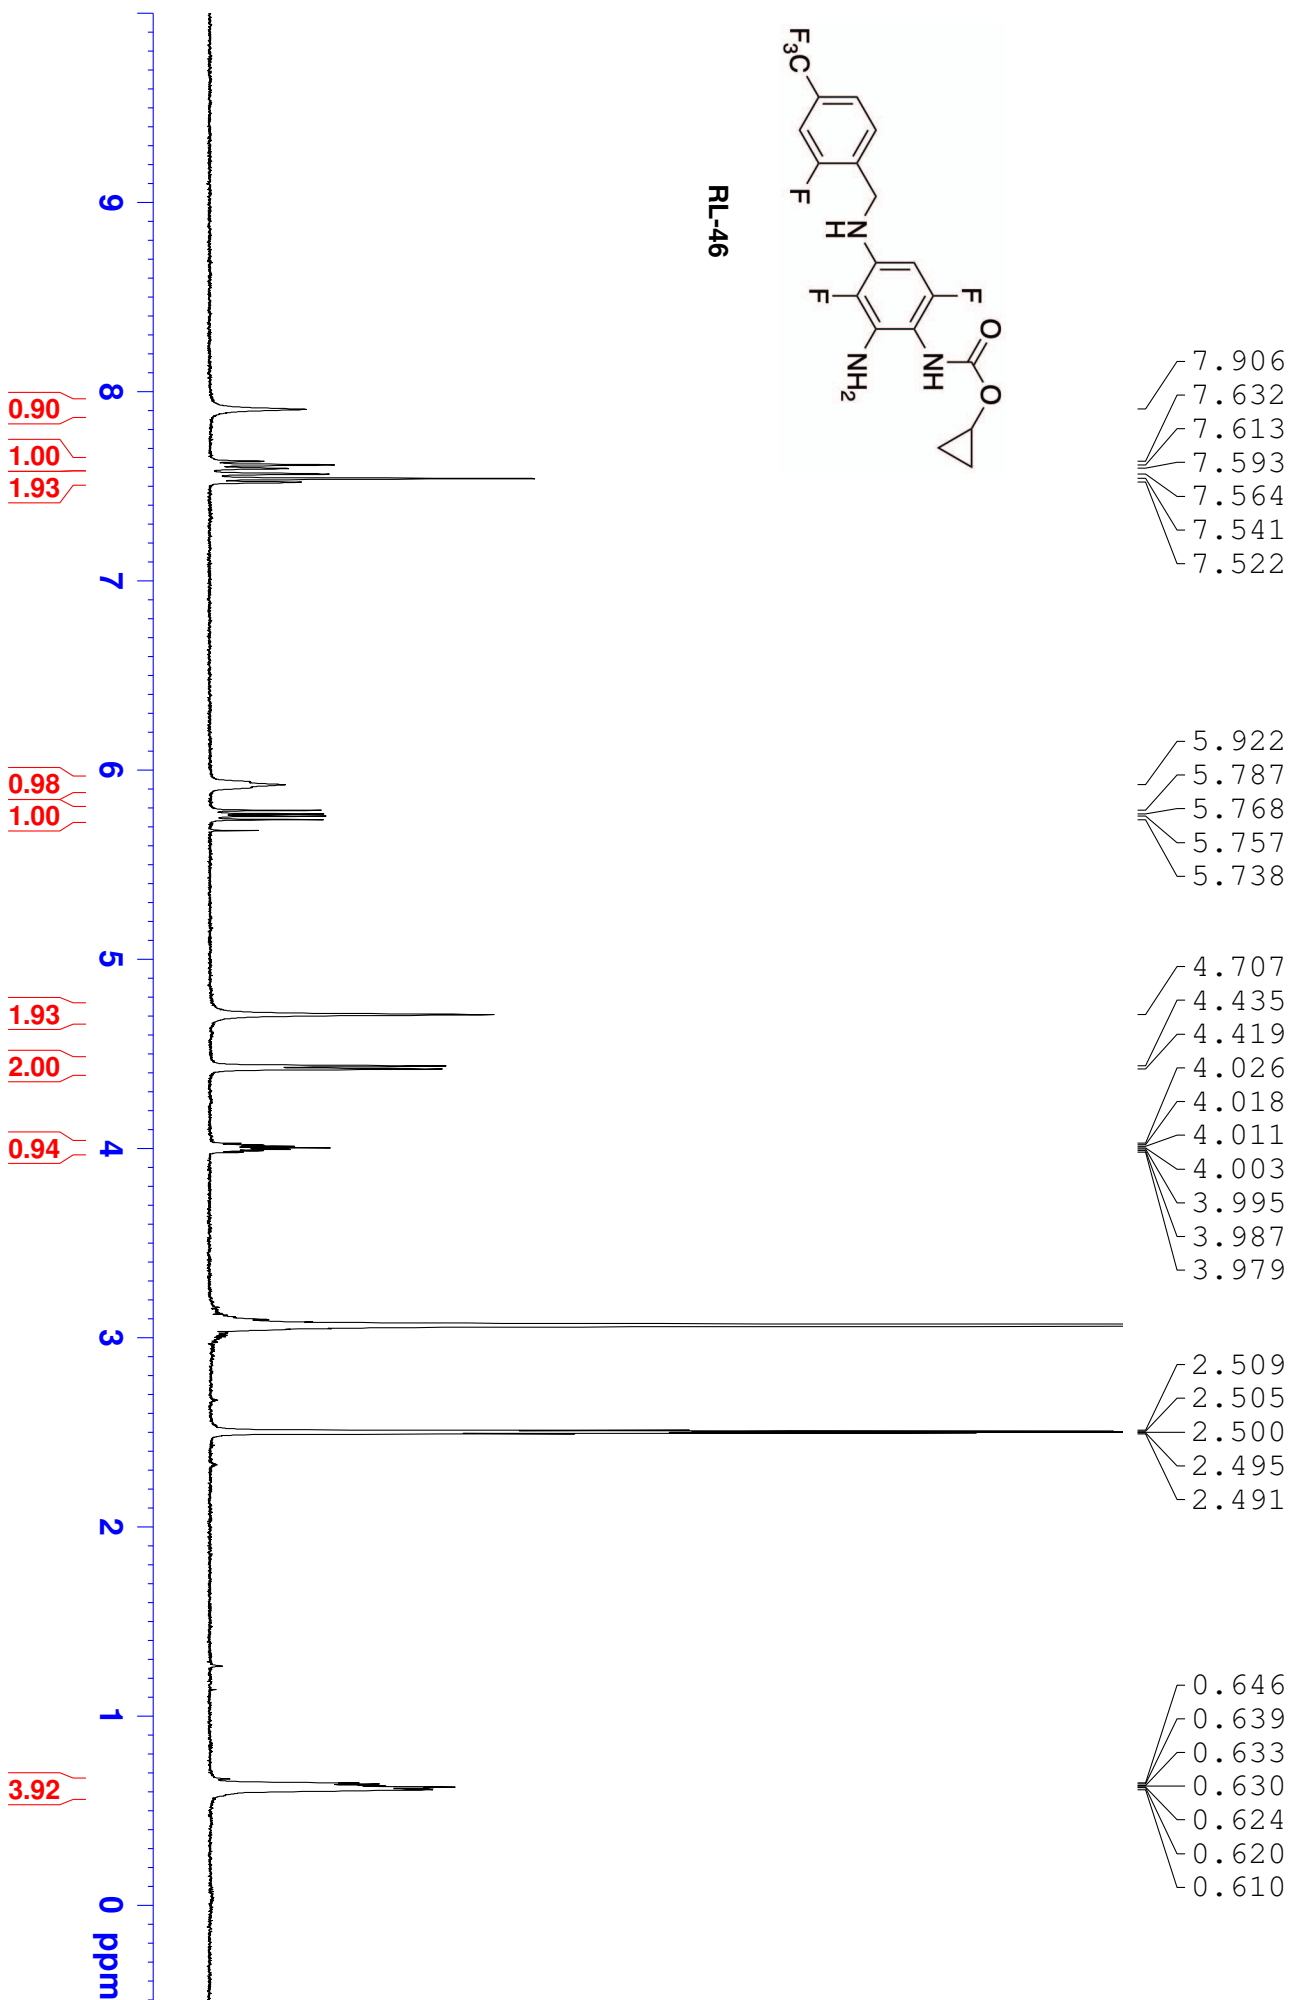

DMSO-d6

RL844.046 acetone-d6 600Mhz

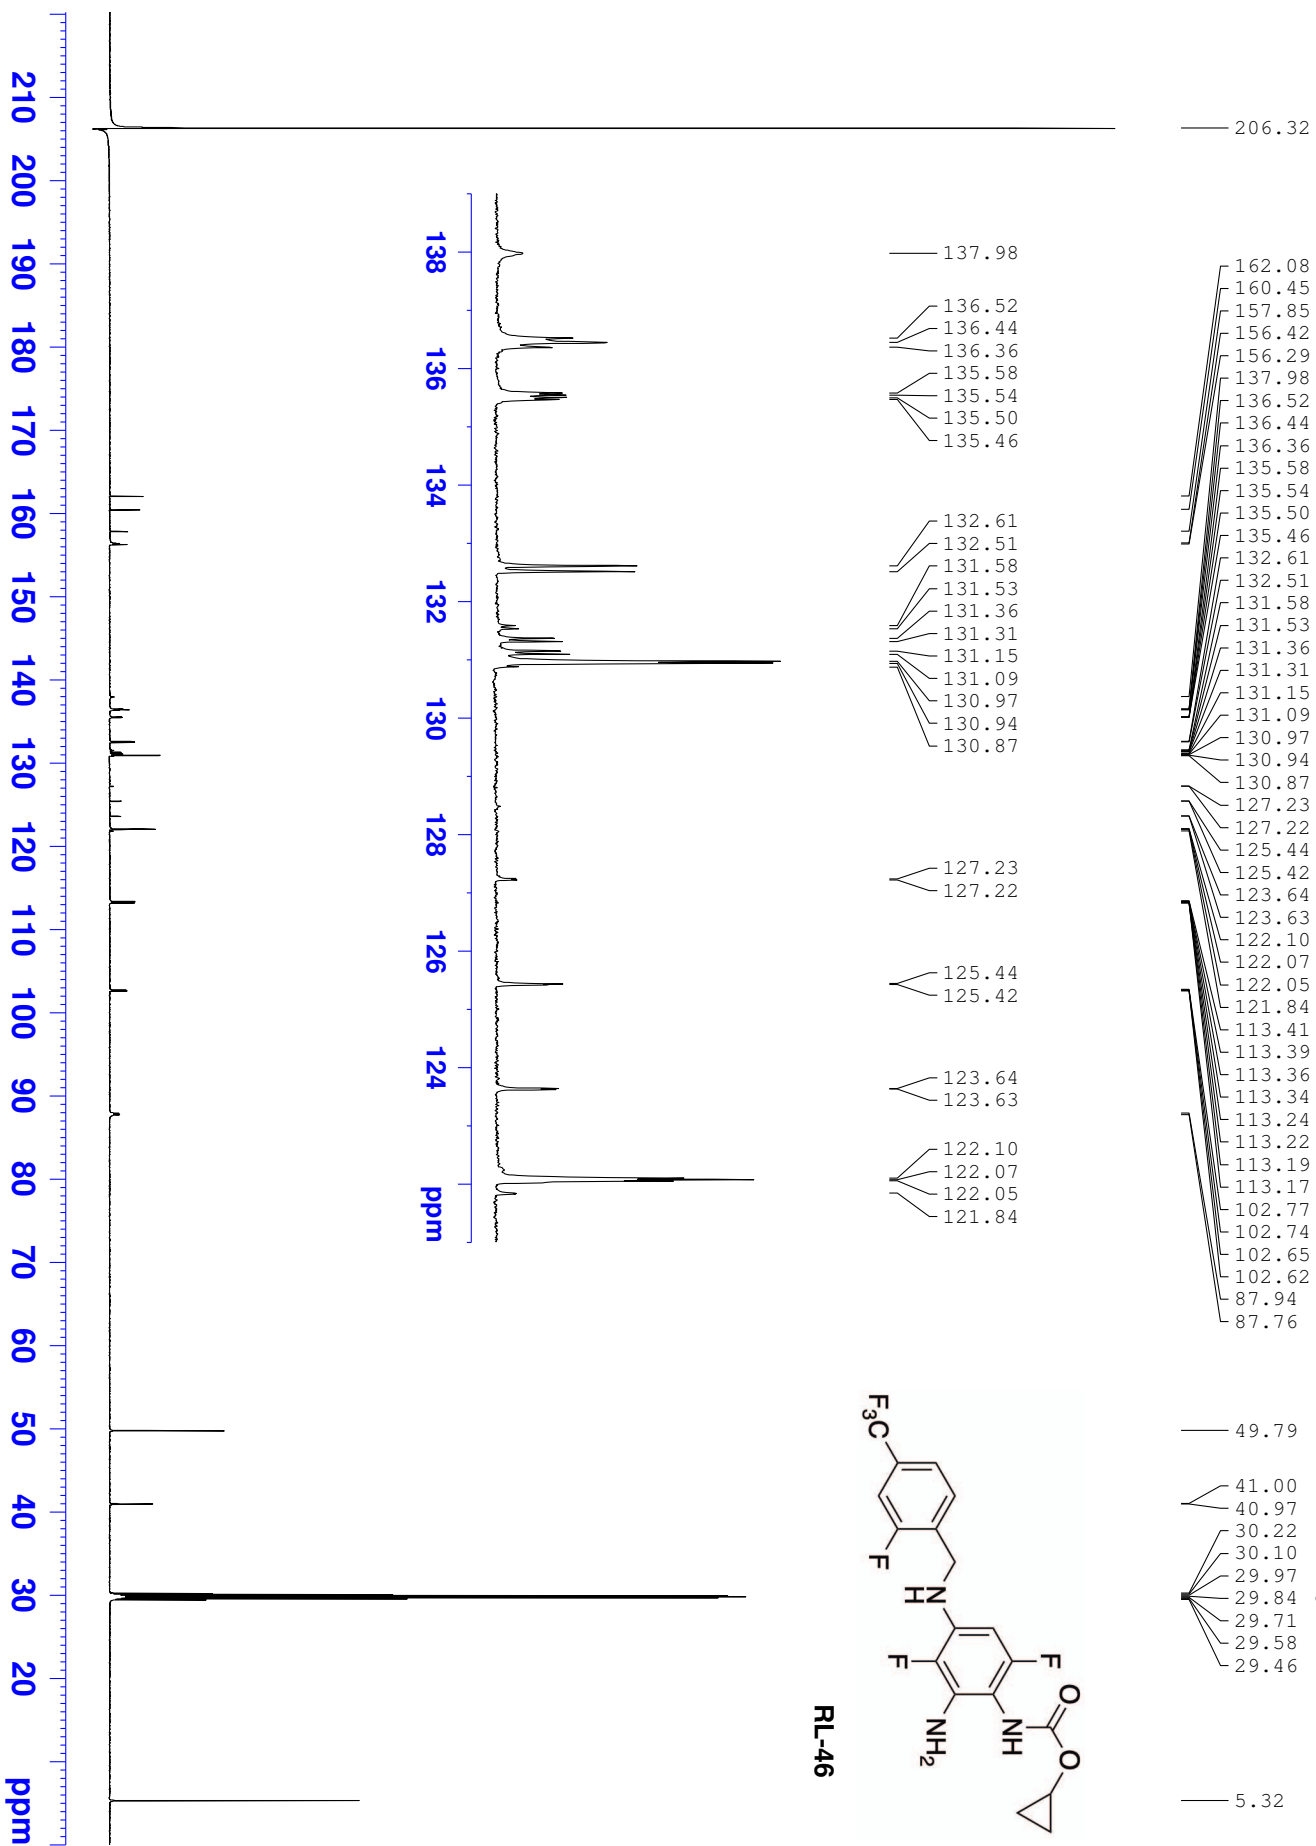

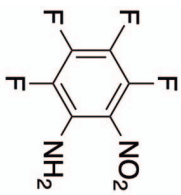

4e

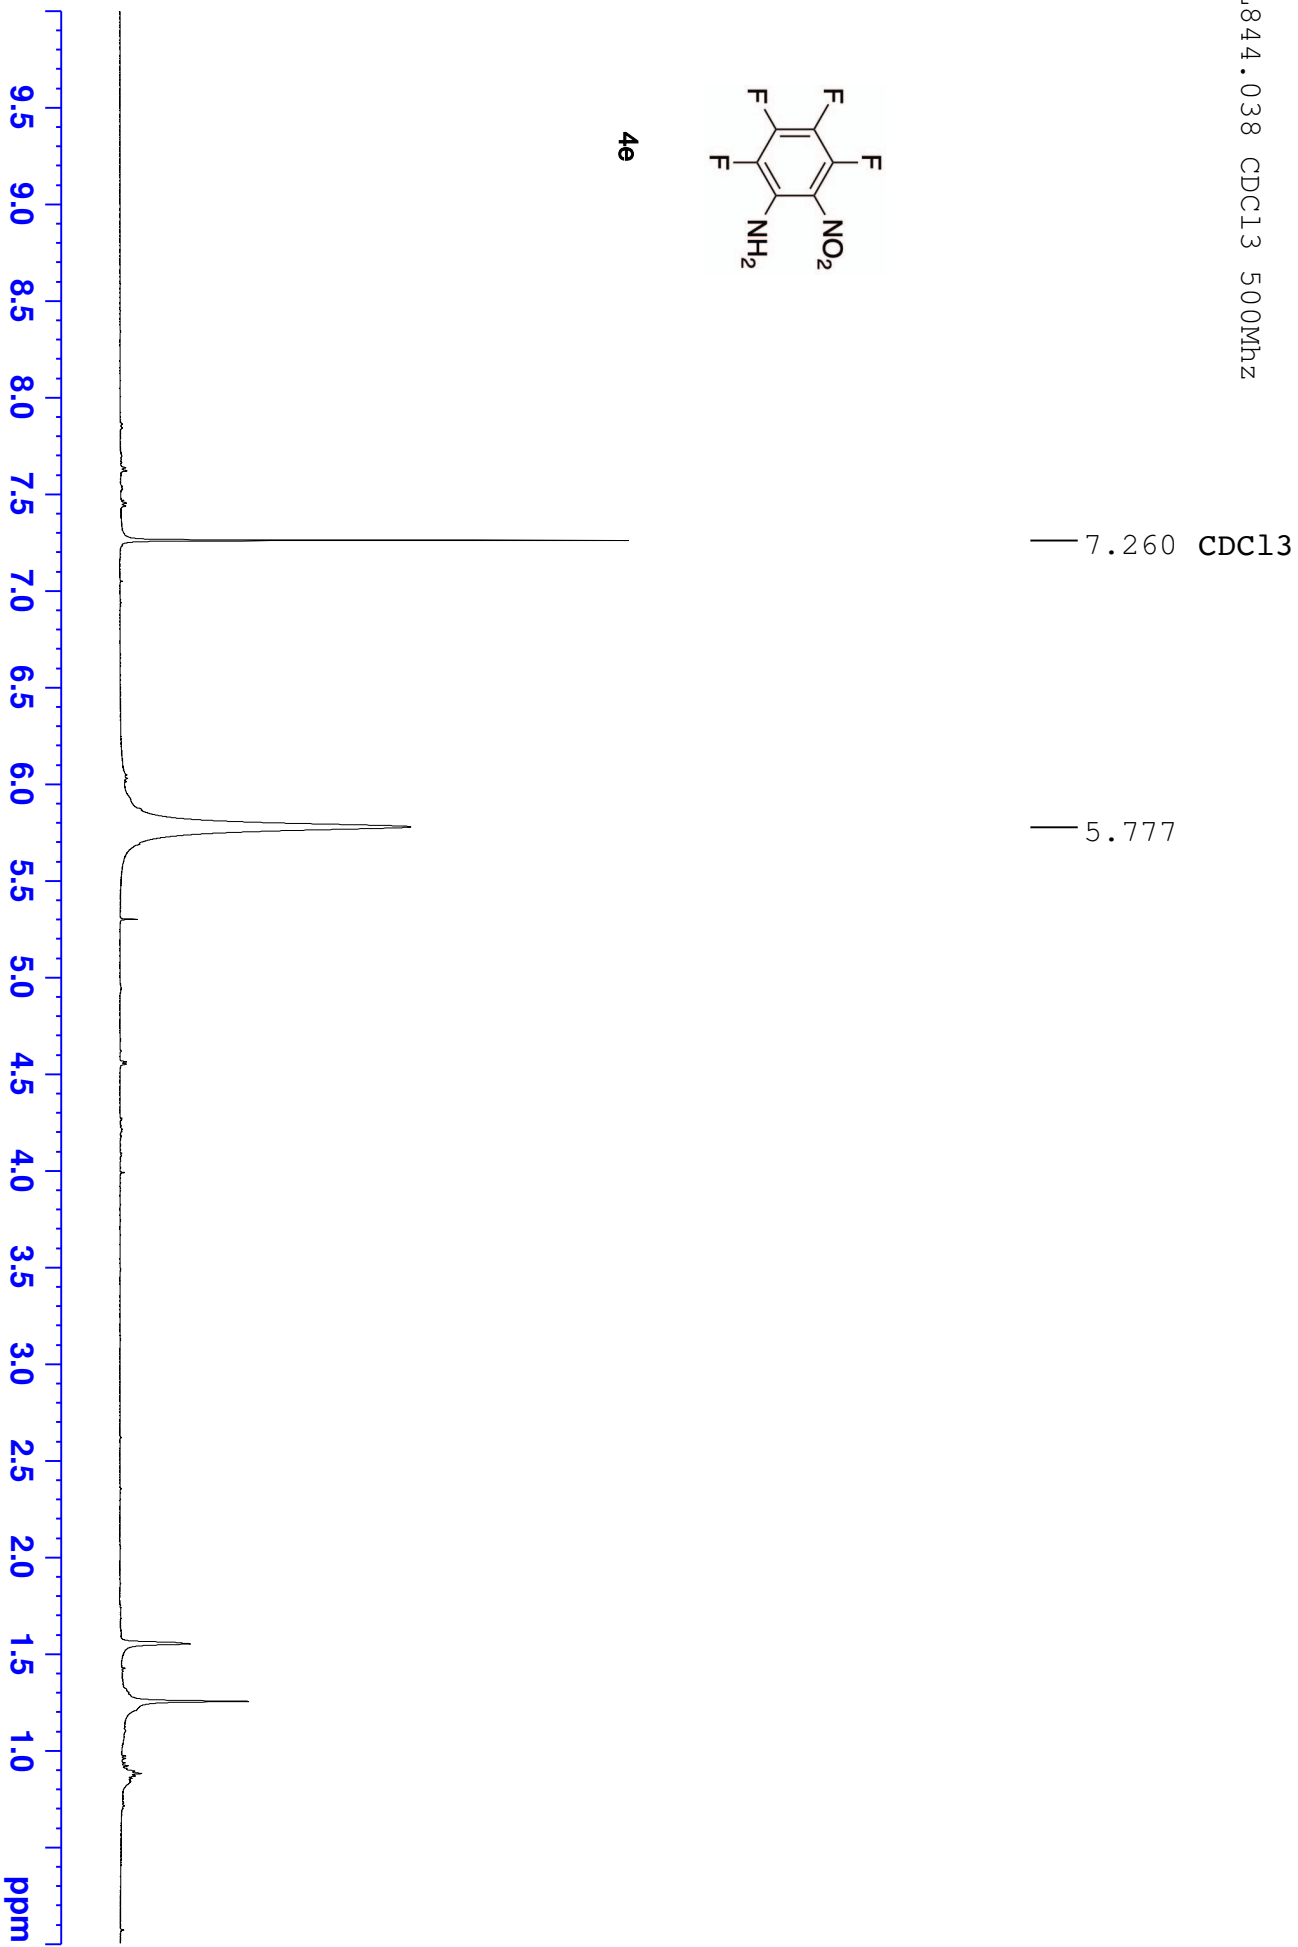

RI844.038 CDCl3 600MHz

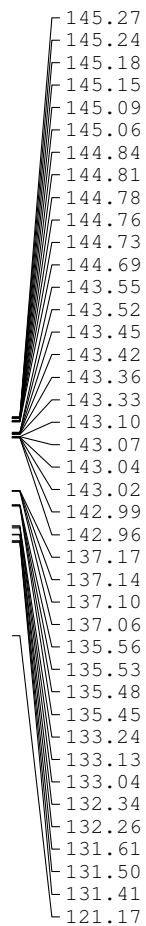

CDCl3

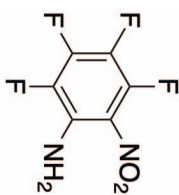

4e

145.5 145.0 144.5 144.0 143.5 143.0 ppm

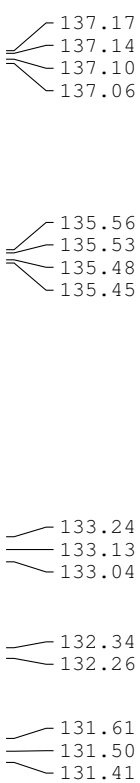

137 136 135 134 133 132 ppm

210 200 190 180 170 160 150 140 130 120 110 100 90 80 70 60 50 40 30 20 ppm

RL844.039 CDCl3 400Mhz

CDCl3

- 7.497
- 7.478
- 7.460
- 7.434
- 7.413
- 7.372
- 7.347
- 7.260

5.861

4.780

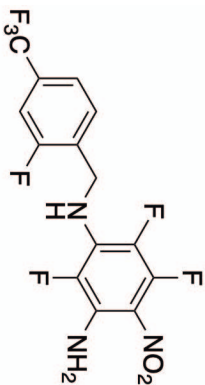

5h

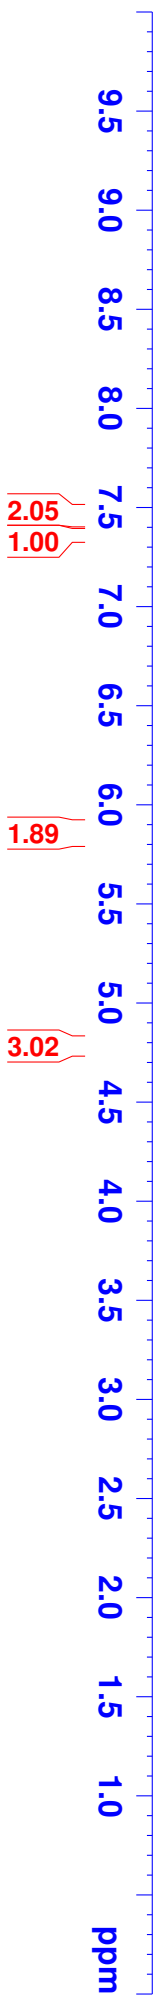

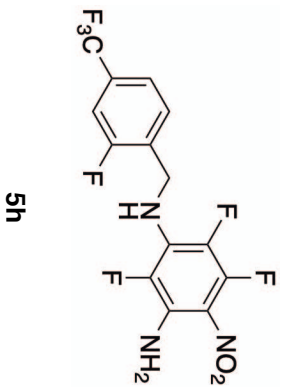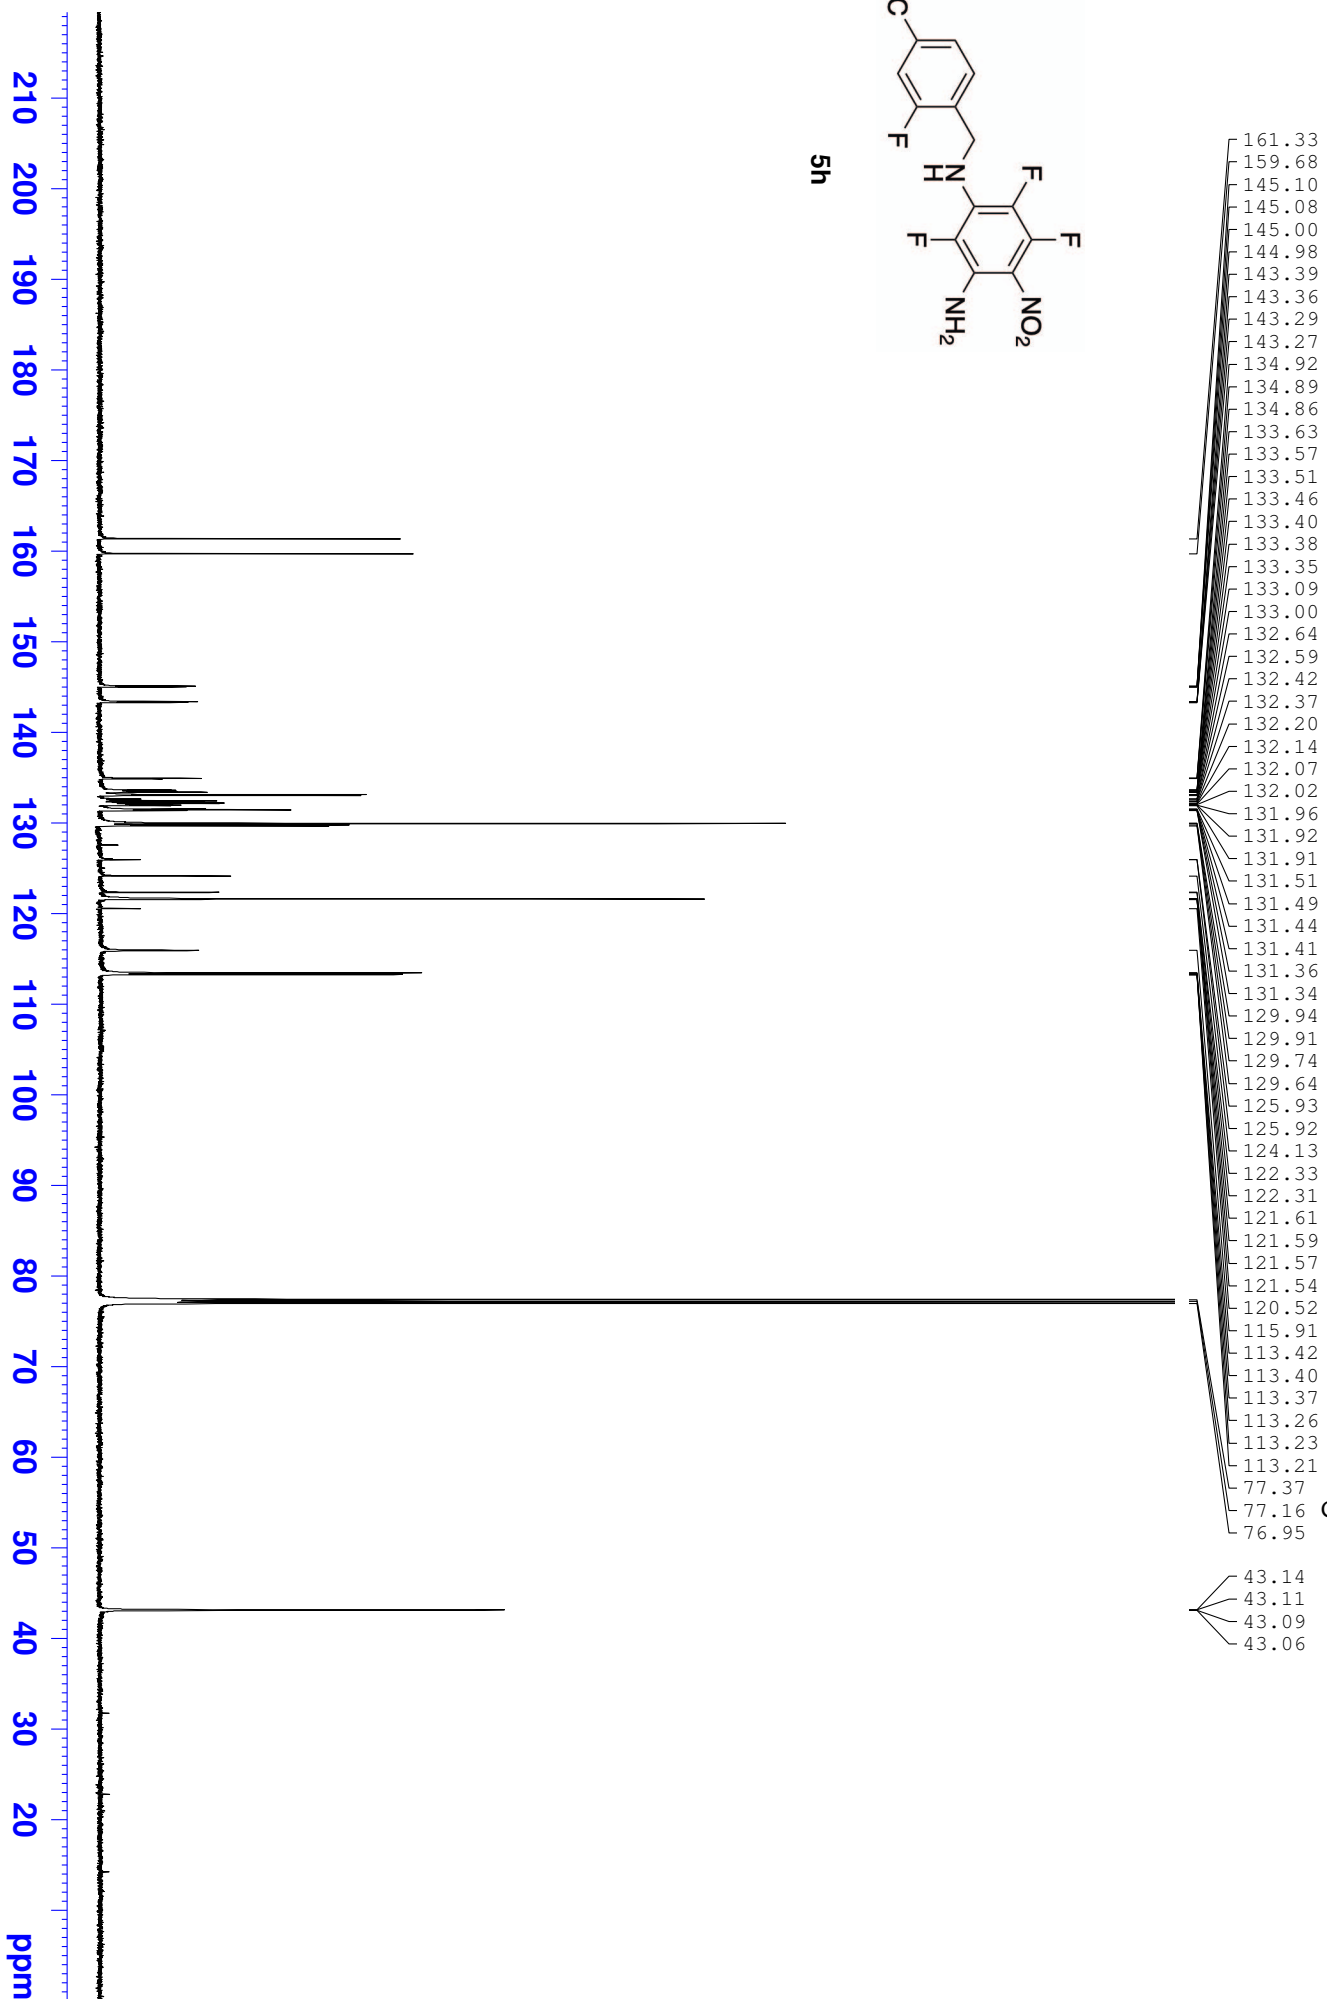

CDCl3

RL844.050 373K DMSO 400MHz

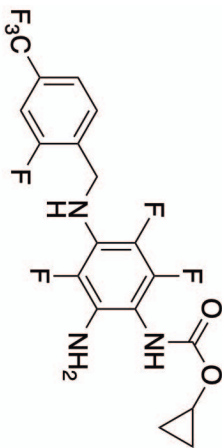

RL-50

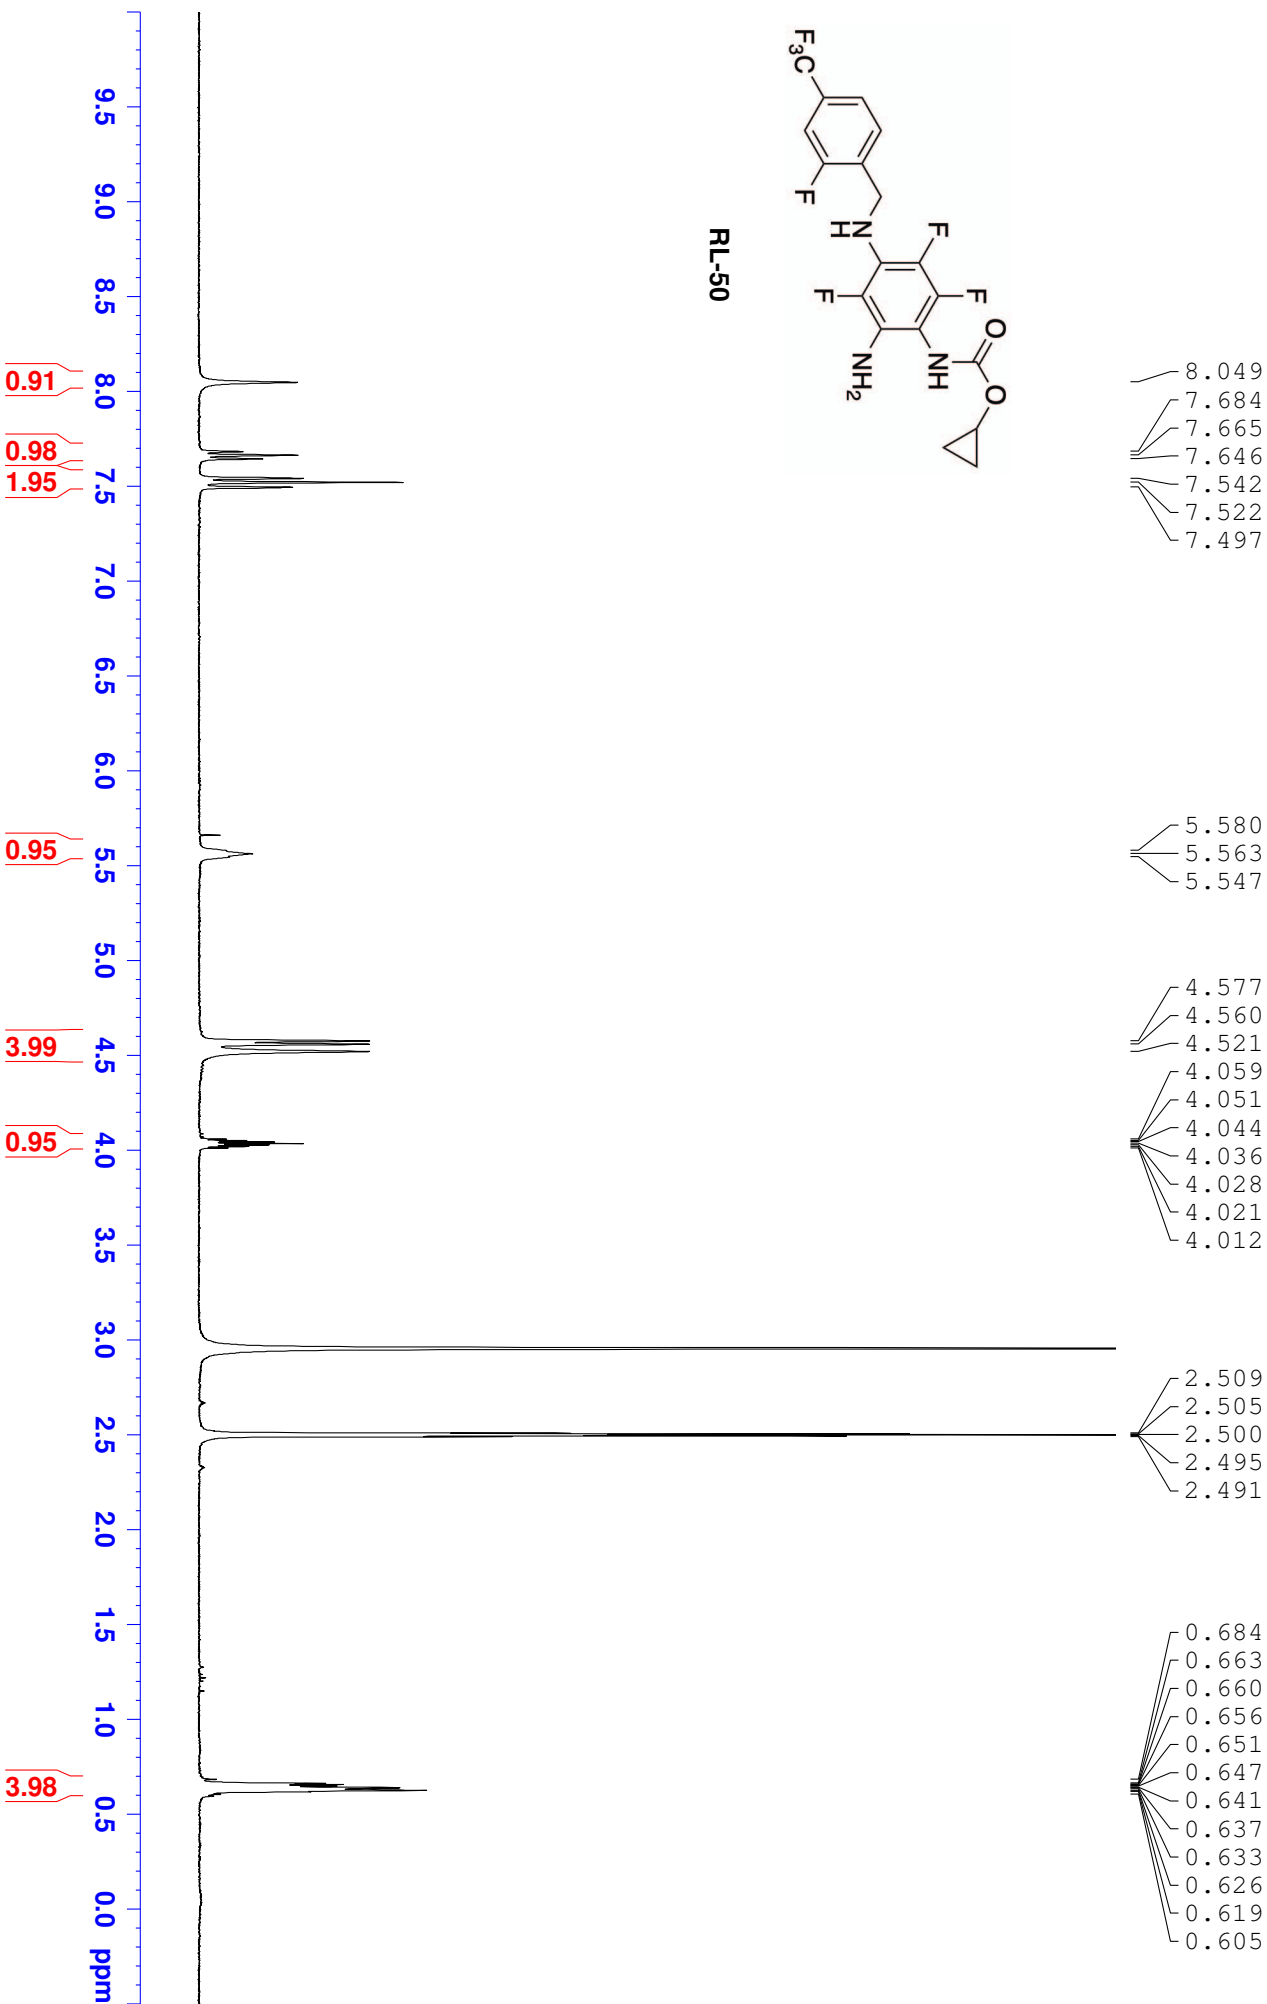

RL844.050 CD3OD 600MHz

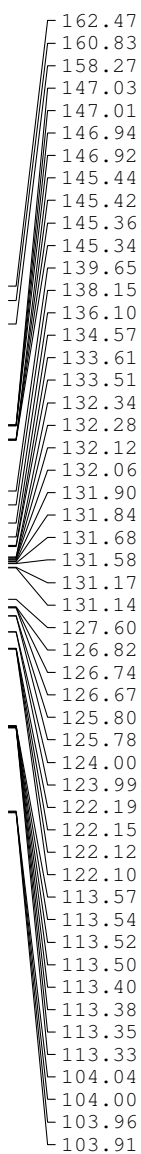

CD3OD

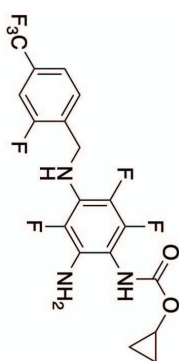

5.51

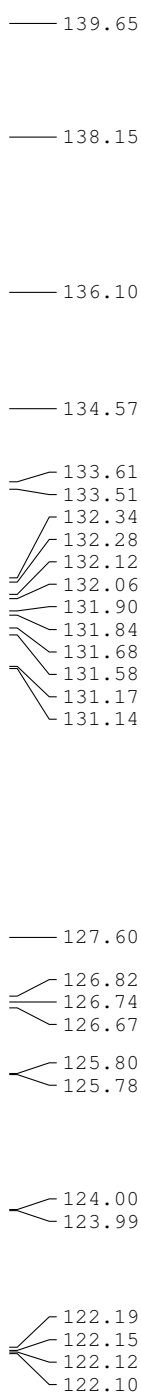

147.03  
147.01  
146.94  
146.92

145.44  
145.42  
145.36  
145.34

139.65  
138.15  
136.10  
134.57  
133.61  
133.51  
132.34  
132.28  
132.12  
132.06  
131.90  
131.84  
131.68  
131.58  
131.17  
131.14

127.60  
126.82  
126.74  
126.67  
125.80  
125.78

124.00  
123.99

122.19  
122.15  
122.12  
122.10

113.57  
113.54  
113.52  
113.50  
113.40  
113.38  
113.35  
113.33

147 146 ppm

113.5 ppm

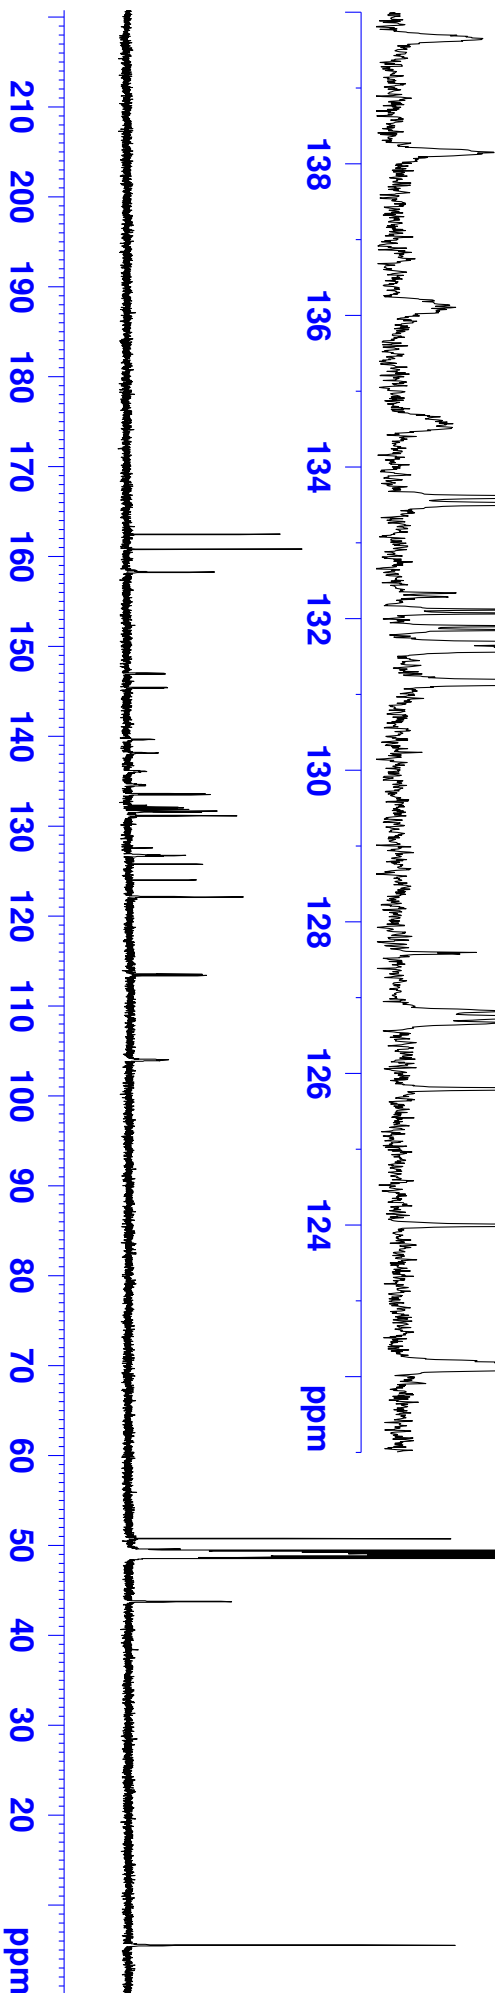



RL702.010 CDC13 400a

CDC13

- 8.883
- 7.950
- 7.945
- 7.929
- 7.924
- 7.901
- 7.897
- 7.877
- 7.873
- 7.448
- 7.427
- 7.260
  
- 6.099
- 6.078
- 6.075
- 6.055
- 5.719
  
- 4.666
- 4.652

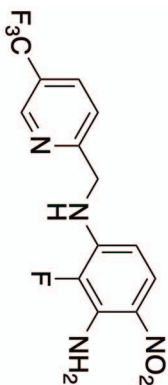

5I

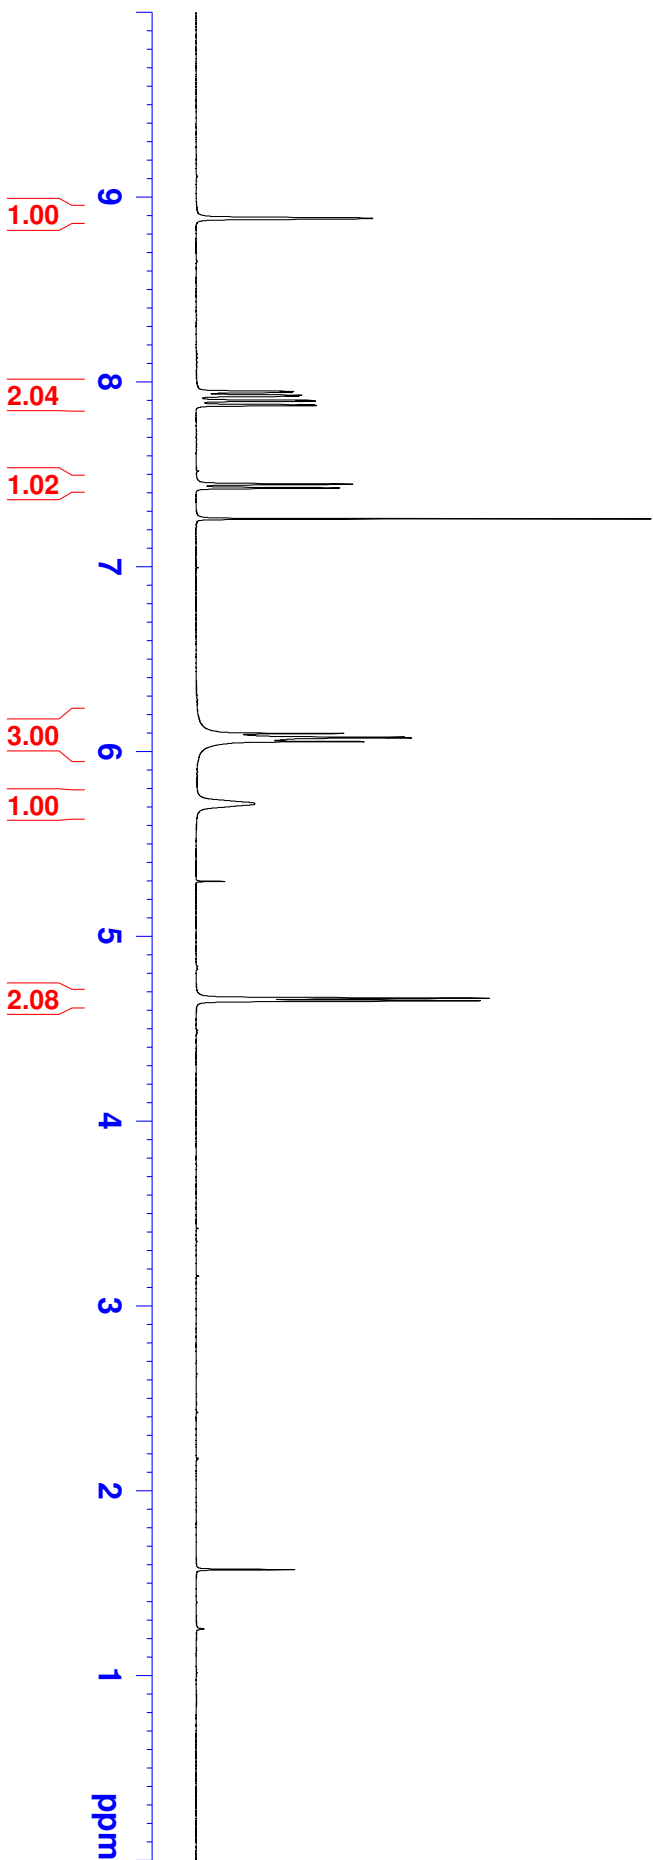

RL702.010 CDC13 400b

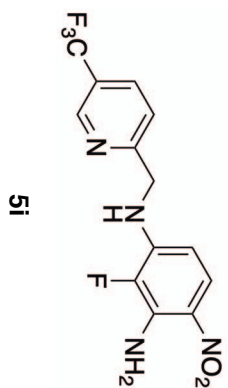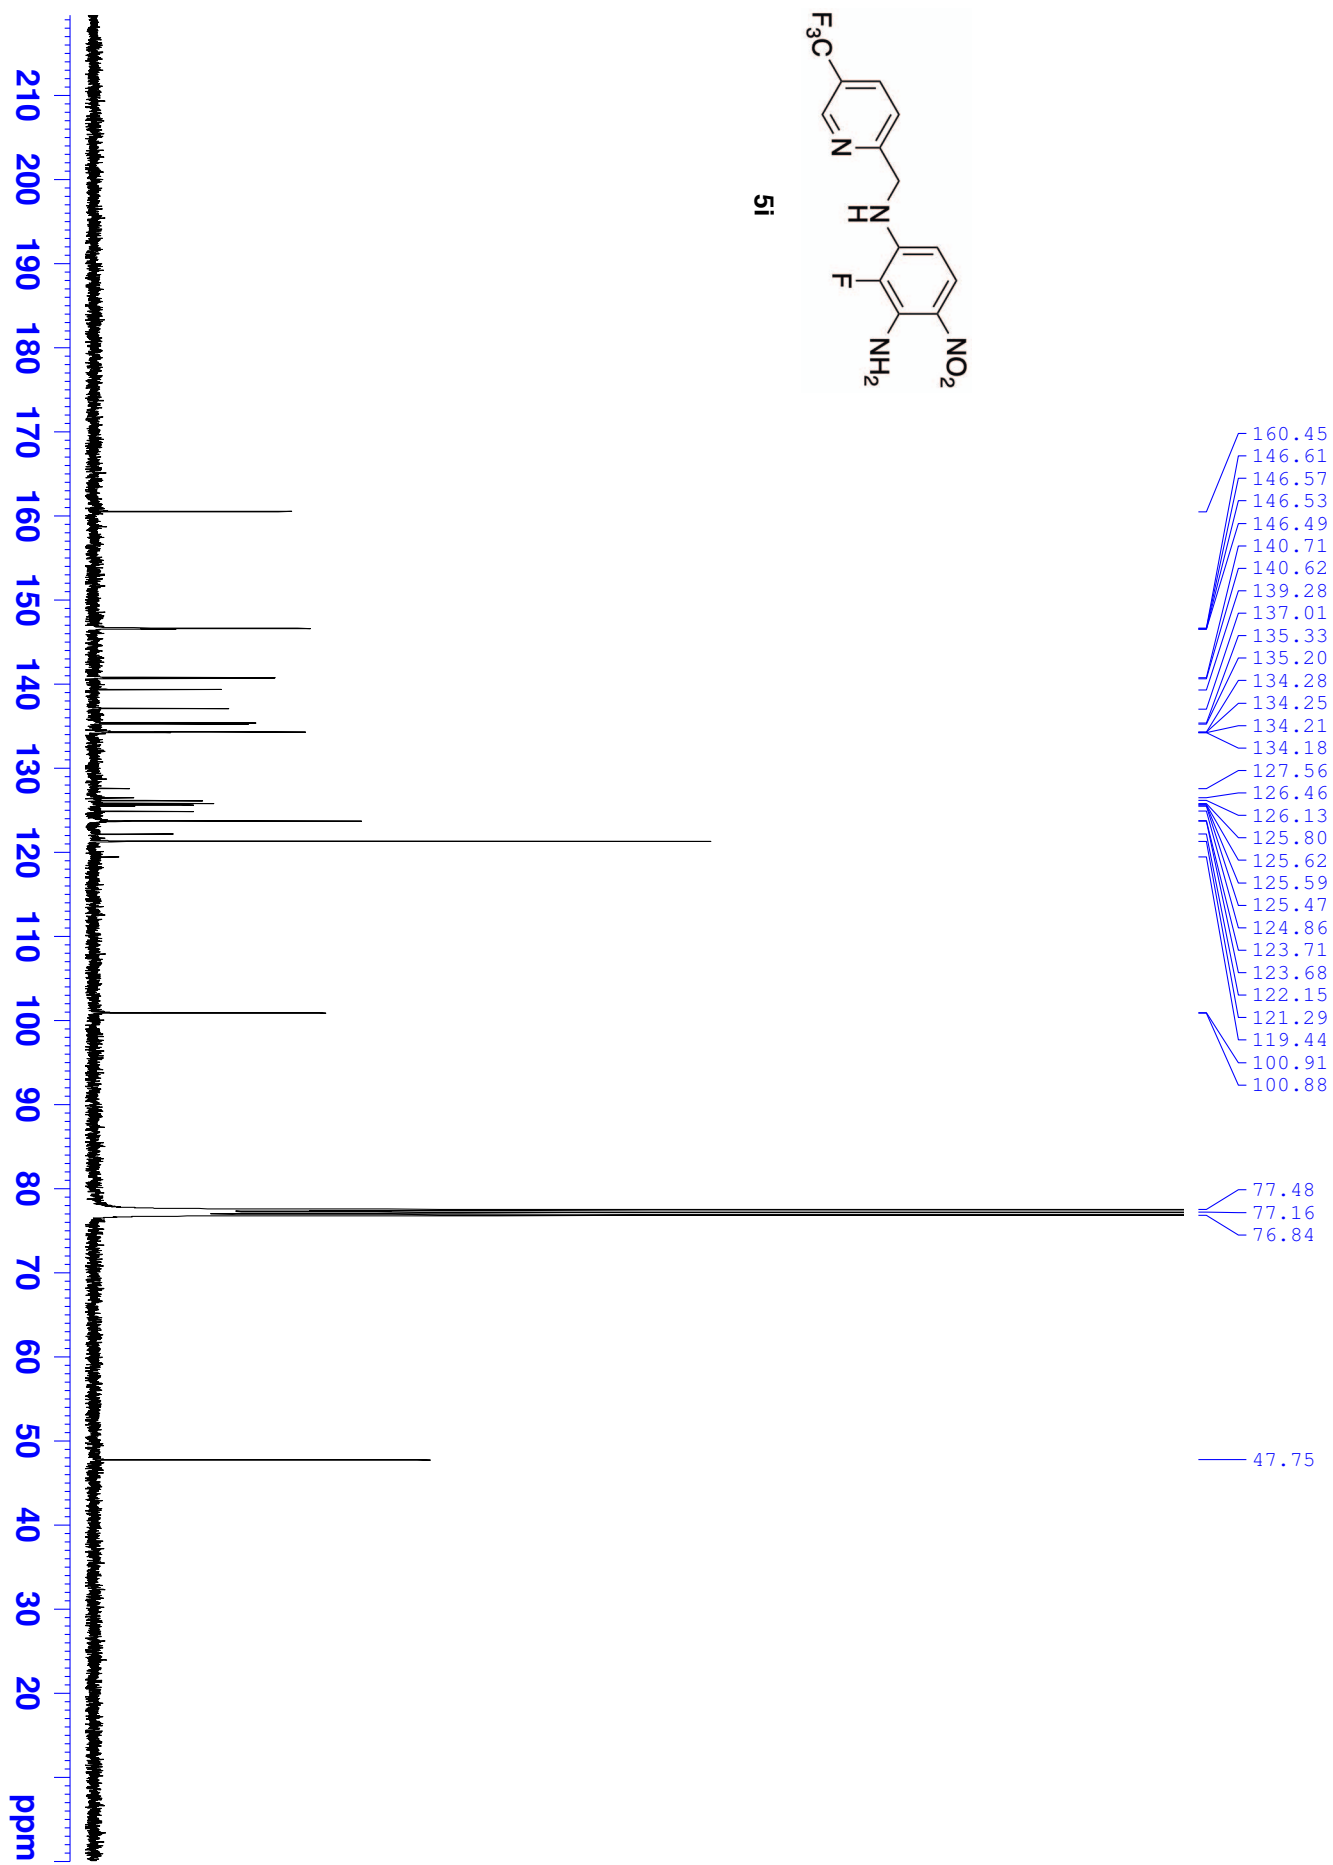

RL702.031 CDC13 400b

CDC13

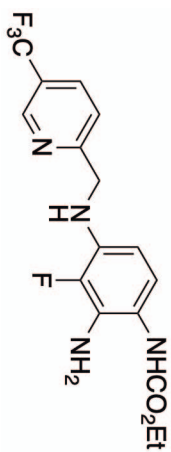

RL-31

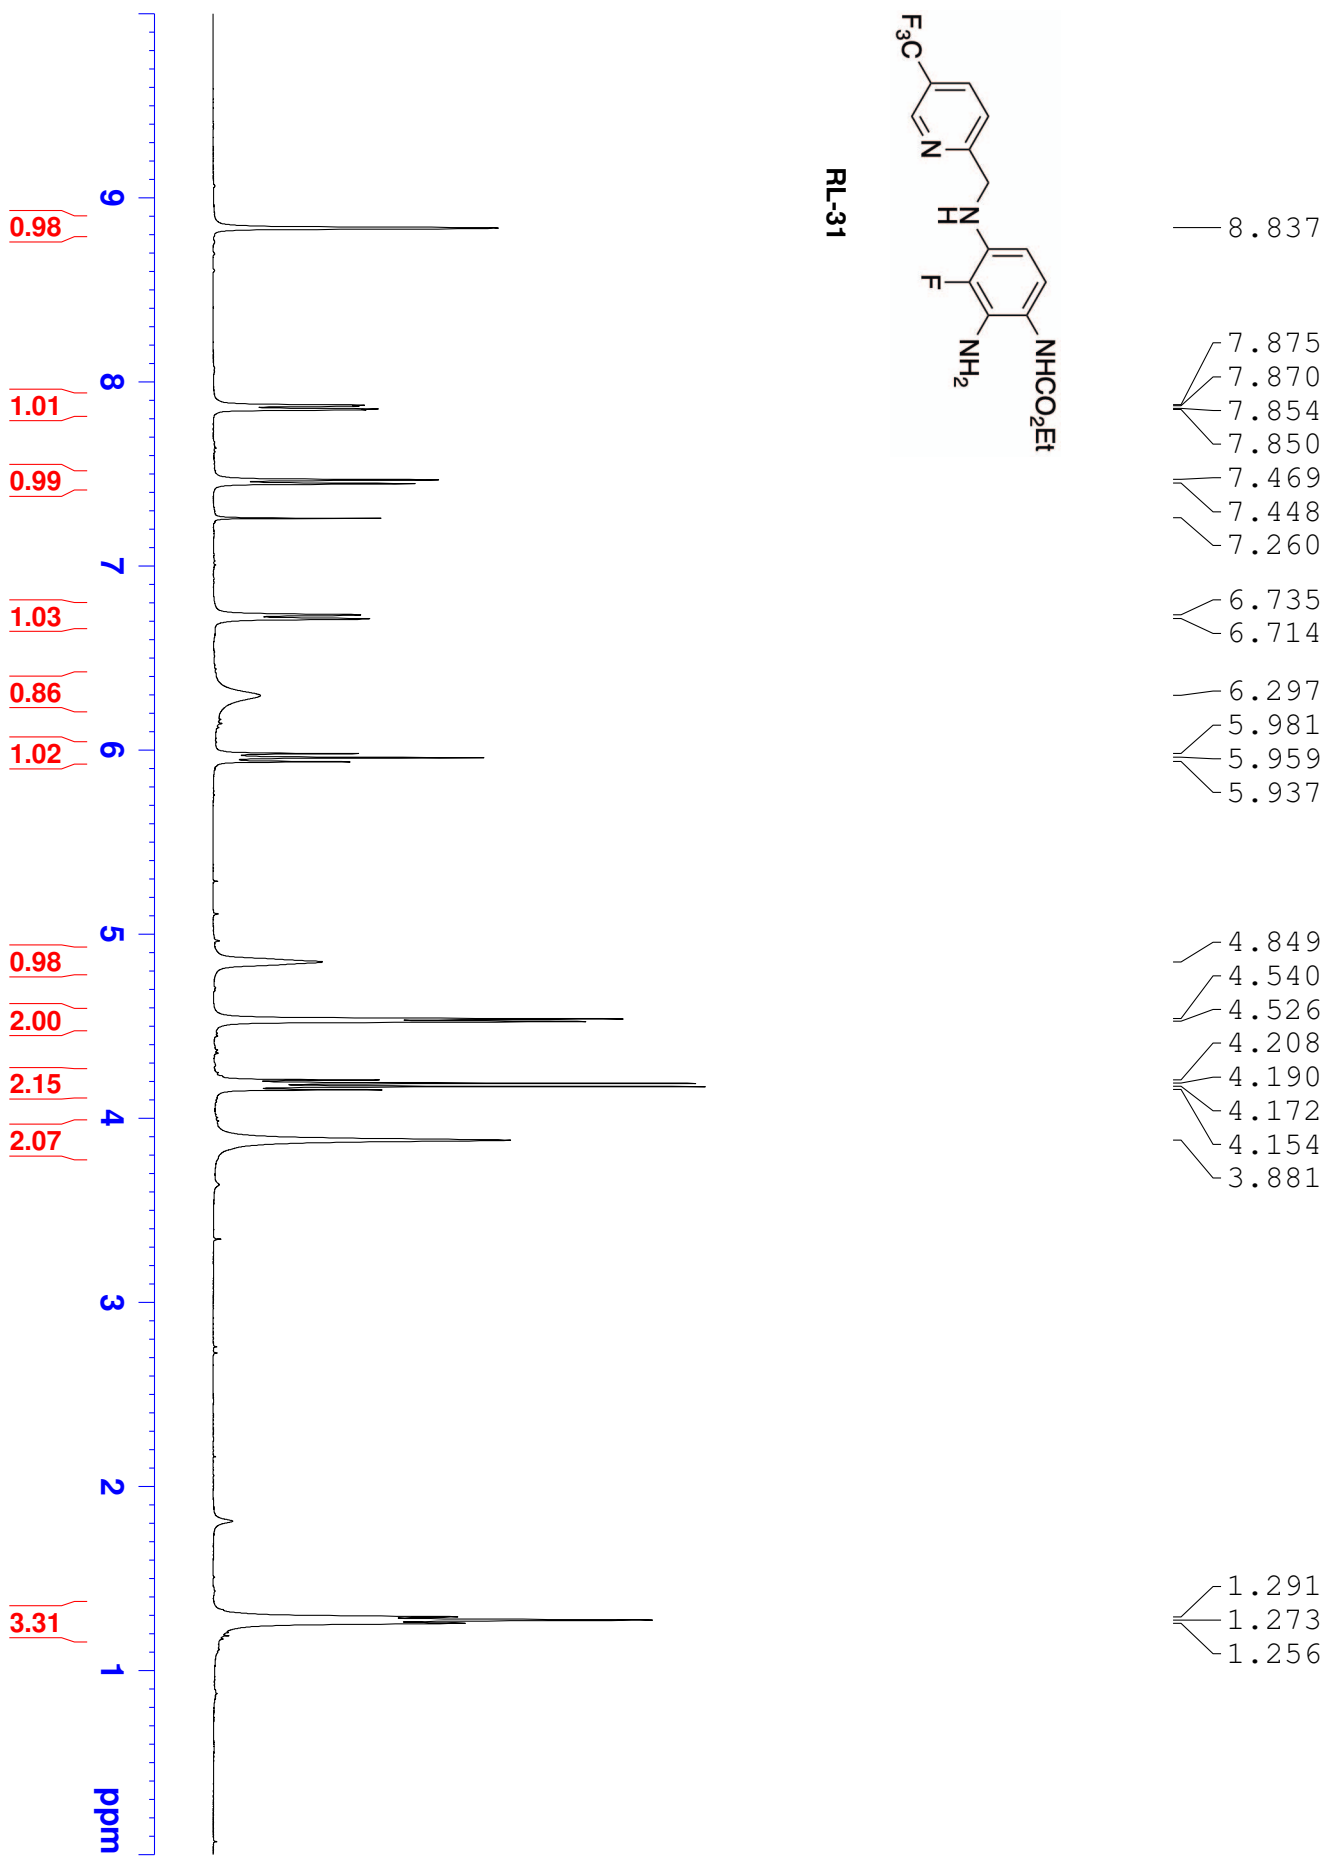

RL702.031 CDCl3 400b

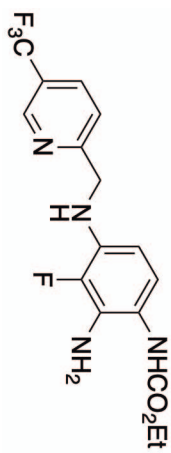

RL-31

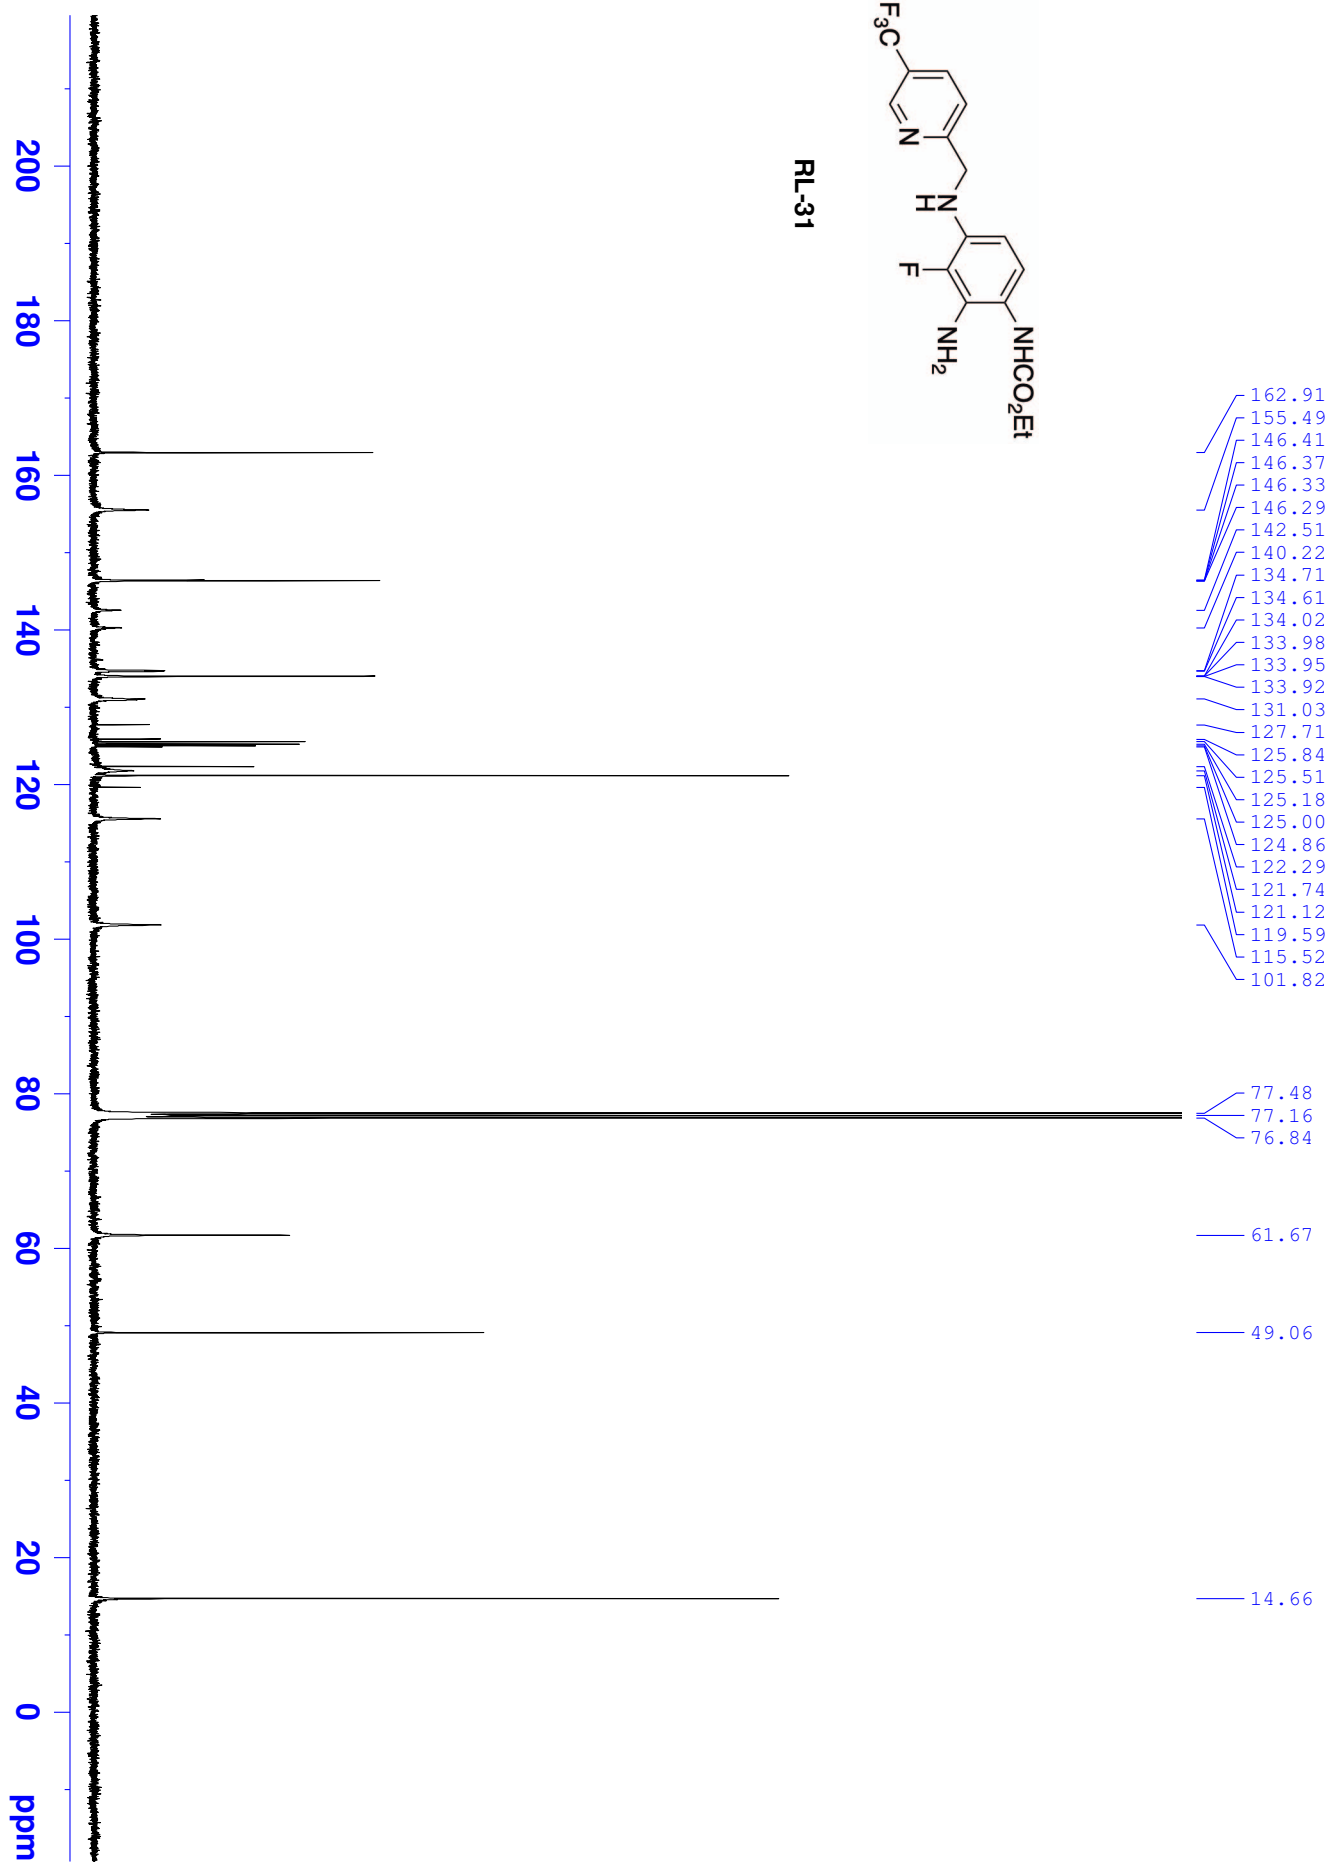

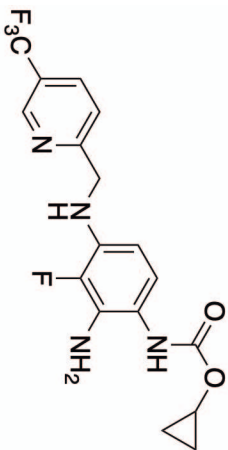

RL-68

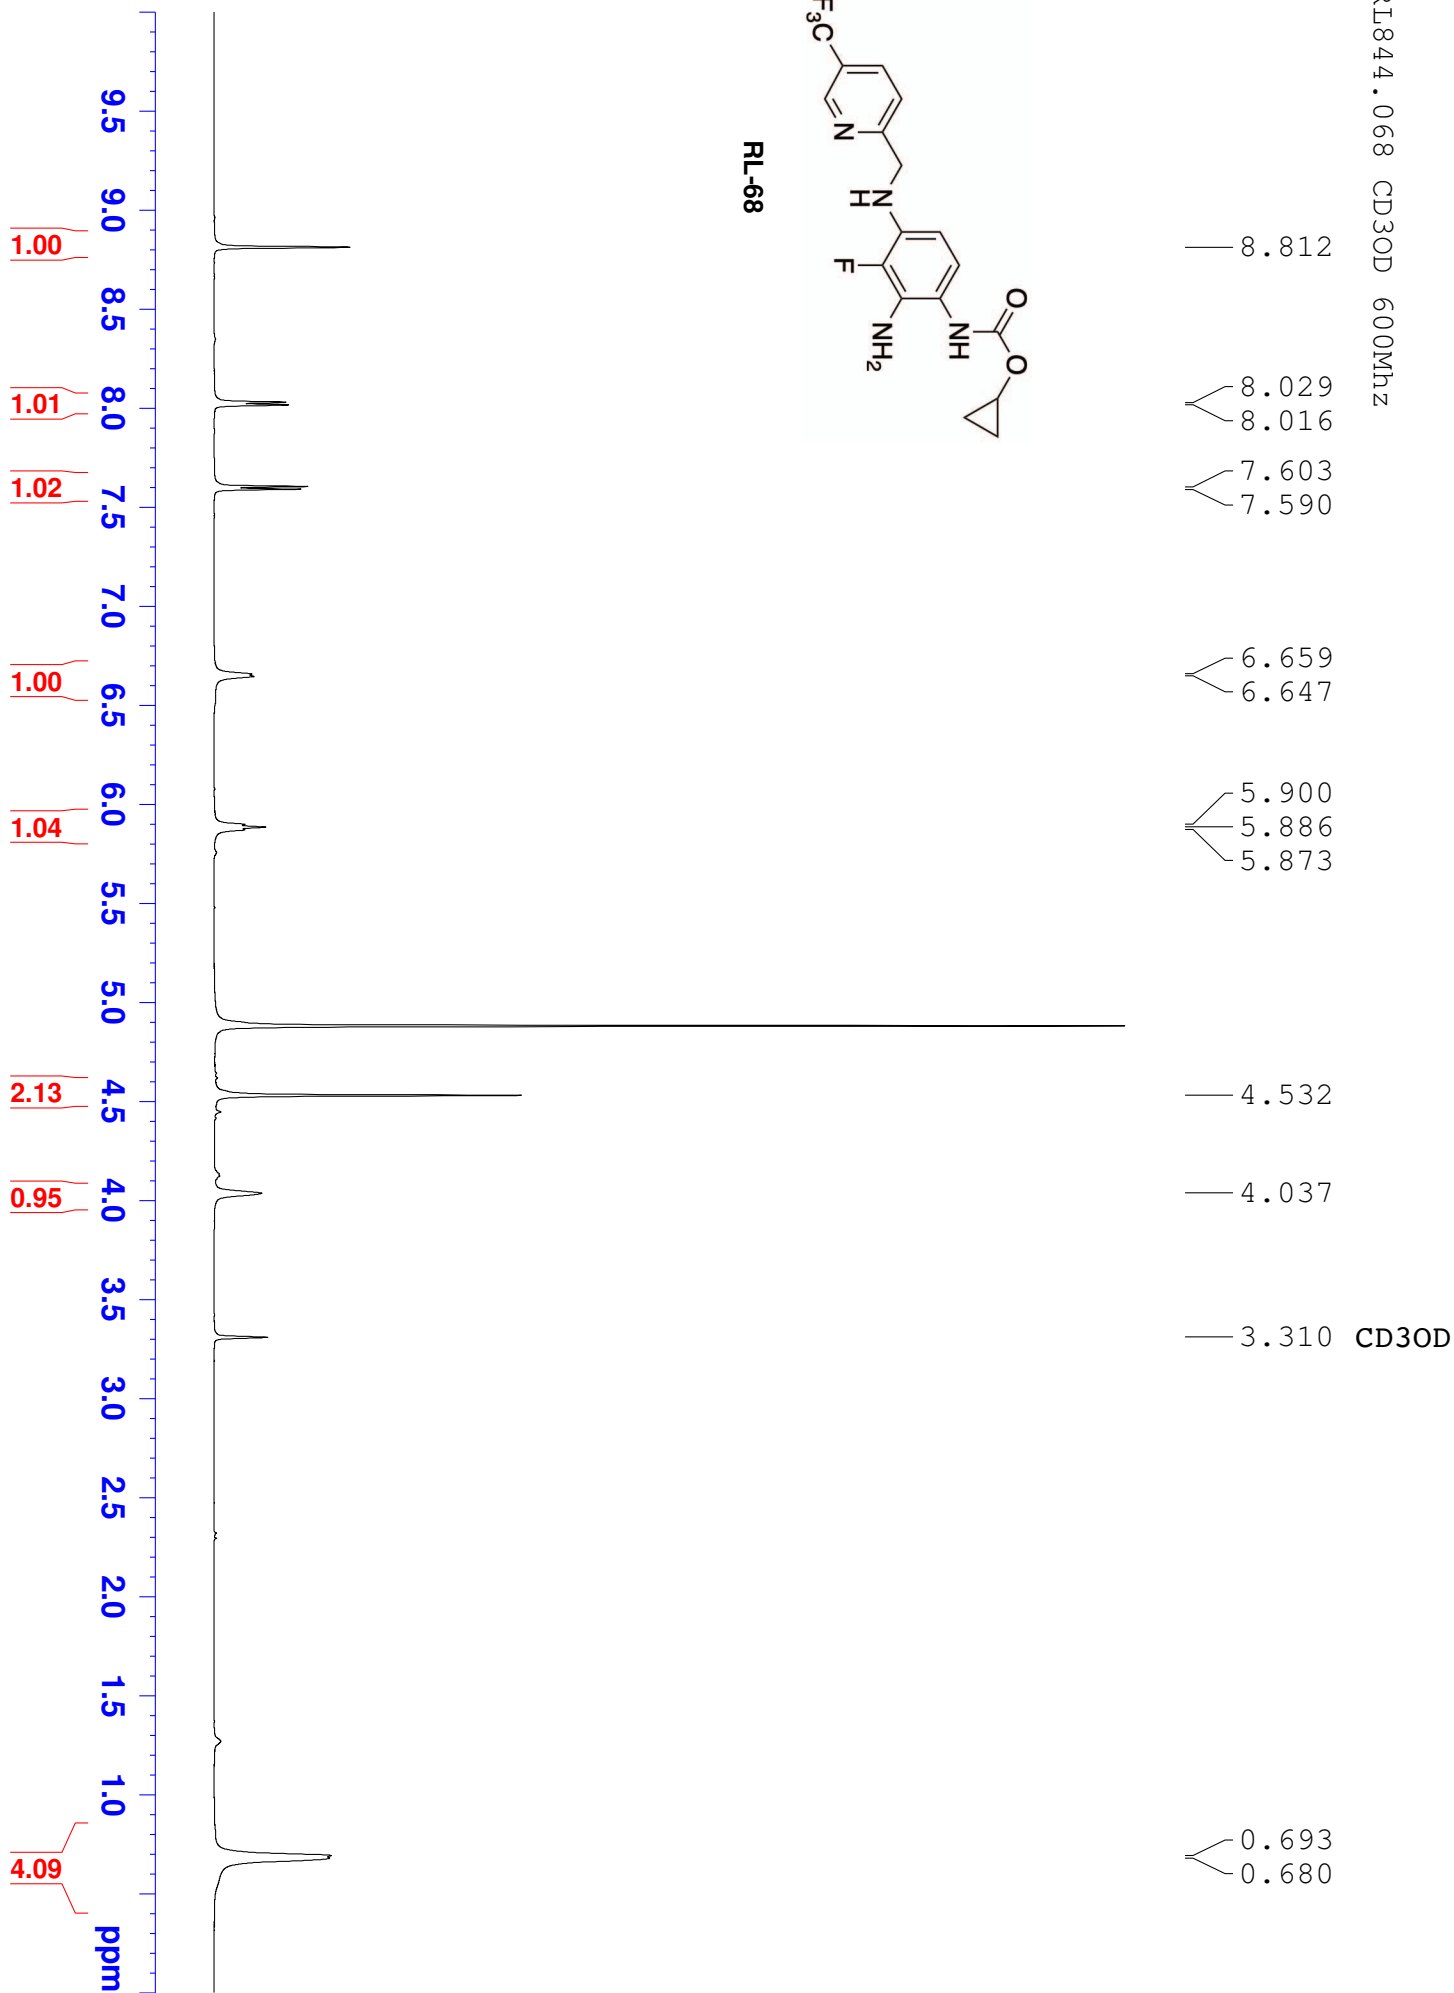

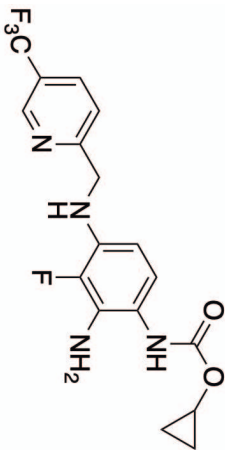

RL-68

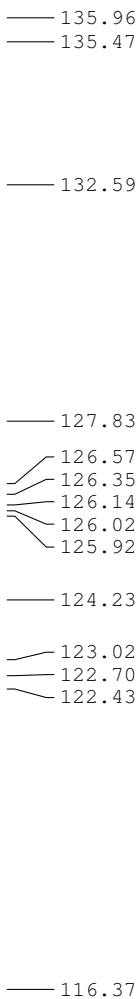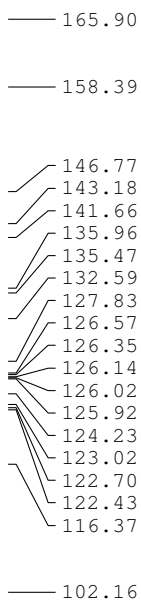

CD3OD

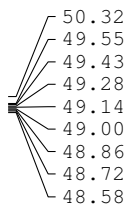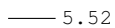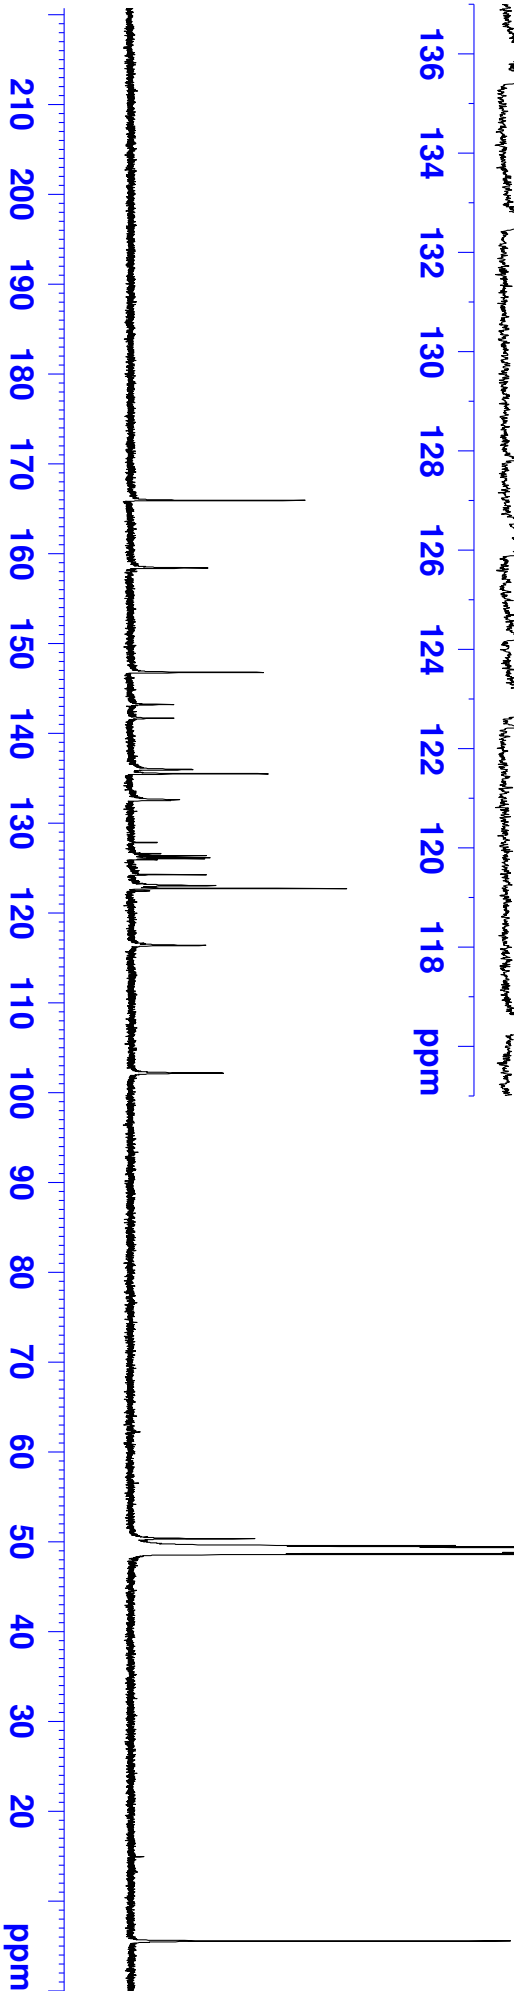

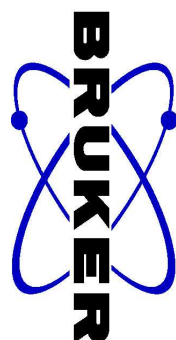

8.514  
 7.460  
 7.438  
 7.260  
 3.960  
 1.689

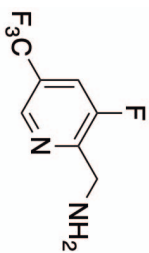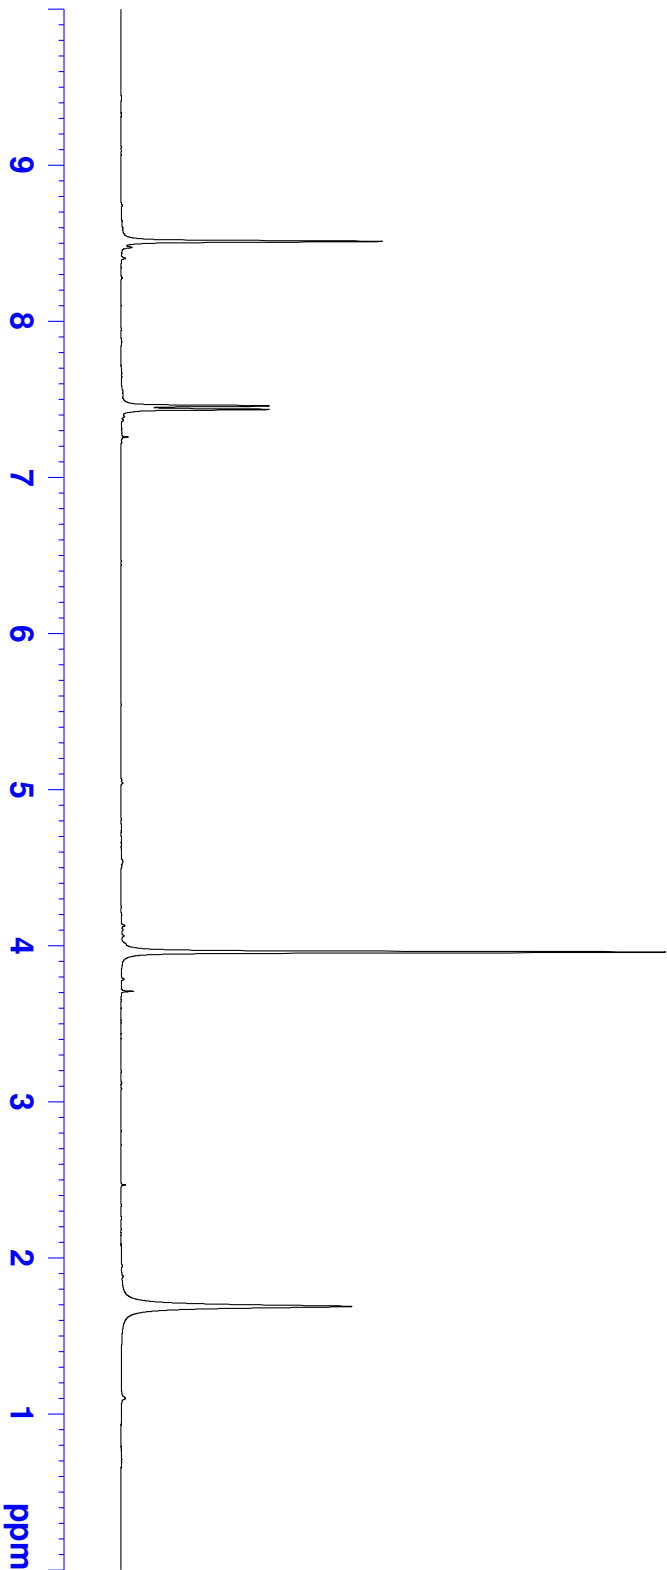

NAME RL844.091\_2  
 EXPNO 10  
 PROCNO 1  
 Date\_ 20180630  
 Time 14.40  
 INSTRUM spect  
 PROBHD 5 mm PABBO BB-  
 PULPROG zg30  
 TD 65536  
 SOLVENT CDCl3  
 NS 16  
 DS 2  
 SWH 8012.820 Hz  
 FIDRES 0.122266 Hz  
 AQ 4.0894966 sec  
 RG 16  
 DW 62.400 usec  
 DE 6.50 usec  
 TE 88.9 K  
 D1 1.00000000 sec  
 TD0 1

===== CHANNEL f1 =====  
 SF01 400.1324710 MHz  
 NUC1 1H  
 P1 14.50 usec  
 SI 65536  
 SF 400.1300103 MHz  
 WDW EM  
 SSB 0  
 LB 0.30 Hz  
 GB 0  
 PC 1.00

RI844.091 CDCl3 400MHz

- 157.37
- 154.79
- 154.34
- 154.19
- 141.64
- 141.59
- 141.54
- 141.50
- 141.46
- 126.84
- 126.80
- 126.68
- 126.66
- 126.50
- 126.47
- 126.17
- 126.13
- 125.83
- 123.97
- 123.95
- 121.26
- 121.25
- 119.87
- 119.84
- 119.80
- 119.77
- 119.66
- 119.62
- 119.59
- 119.55
- 118.54
- 119.87
- 119.84
- 119.80
- 119.77
- 119.66
- 119.62
- 119.59
- 119.55
- 118.54

- 77.48
  - 77.16
  - 76.84
- CDCl3

- 41.53

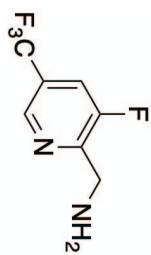

- 126.84
- 126.80
- 126.68
- 126.66
- 126.50
- 126.47
- 126.17
- 126.13
- 125.83
- 125.80

- 123.97
- 123.95

- 121.26
- 121.25

- 119.87
- 119.84
- 119.80
- 119.77
- 119.66
- 119.62
- 119.59
- 119.55

- 118.54

127 126 125 124 123 122 121 120 ppm

210 200 190 180 170 160 150 140 130 120 110 100 90 80 70 60 50 40 30 20 ppm



RL844.094 acetone-d6 600Mhz

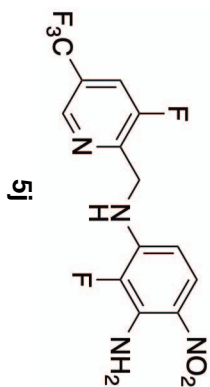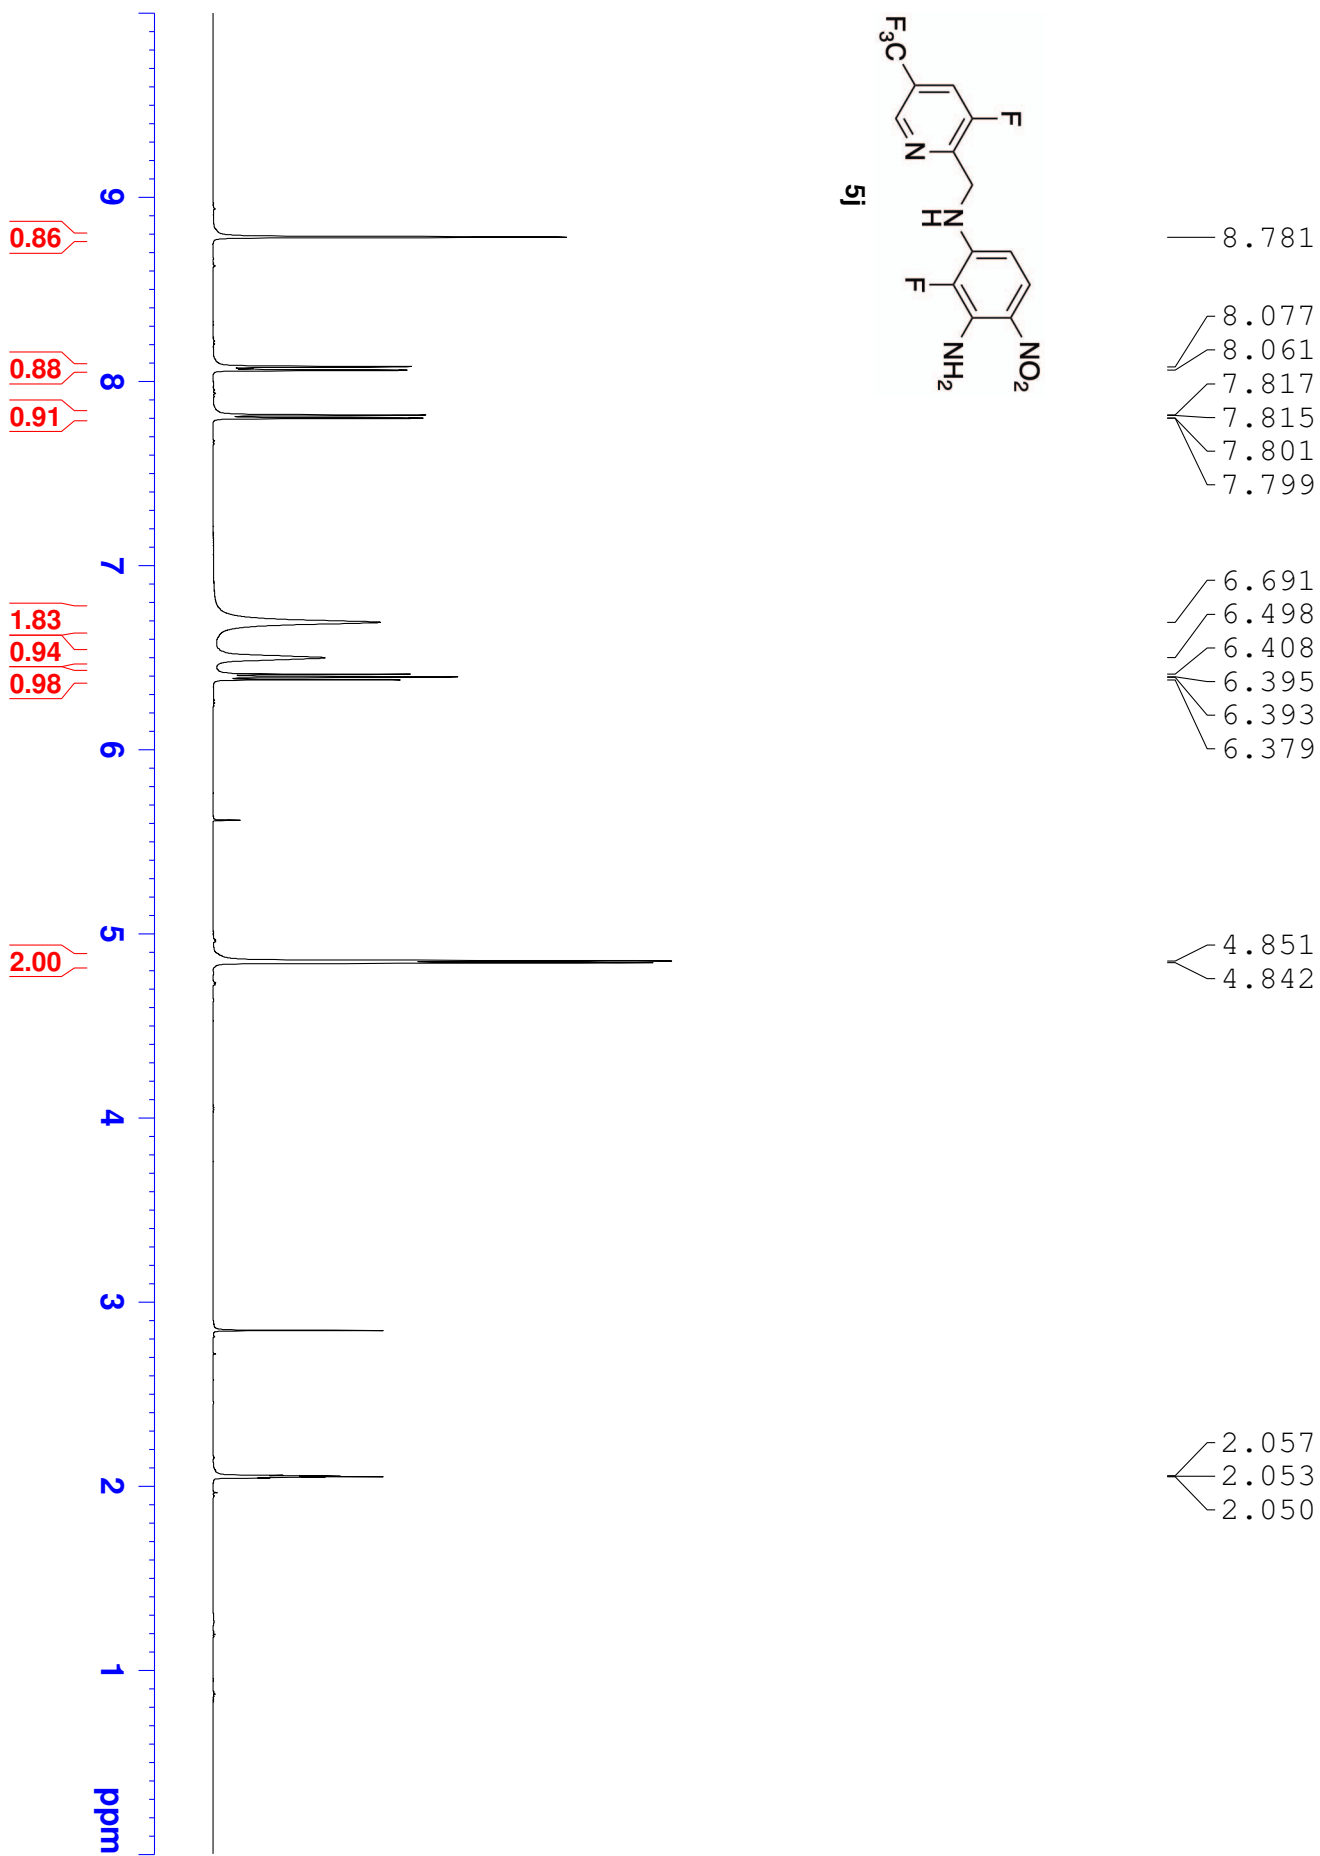

RI844.094 acetone-d6 600Mhz

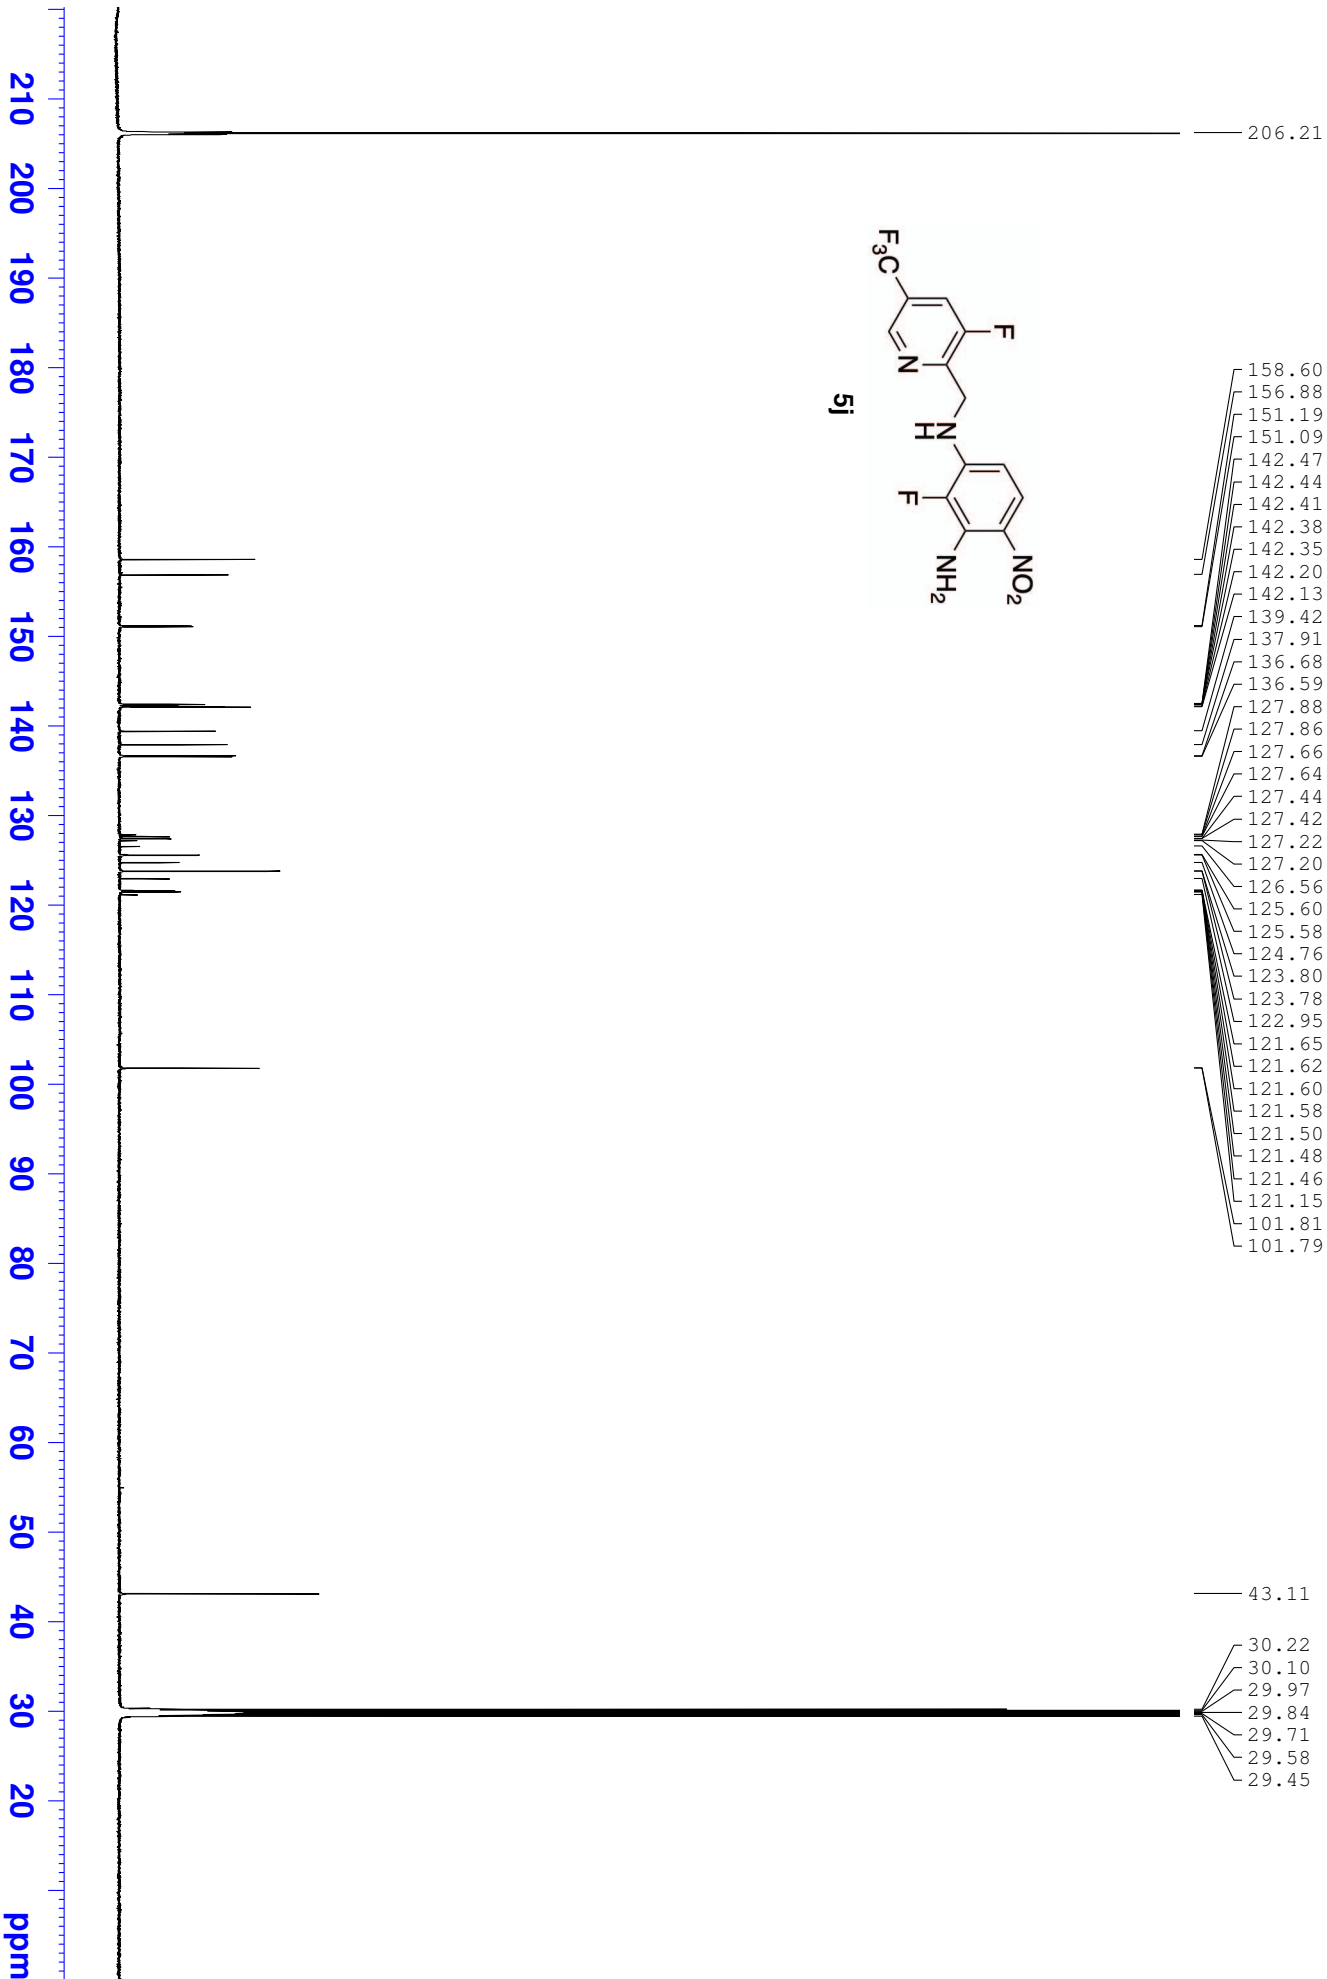

acetone-d6

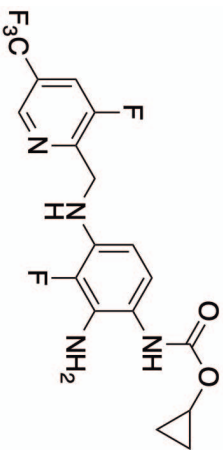

RL-96

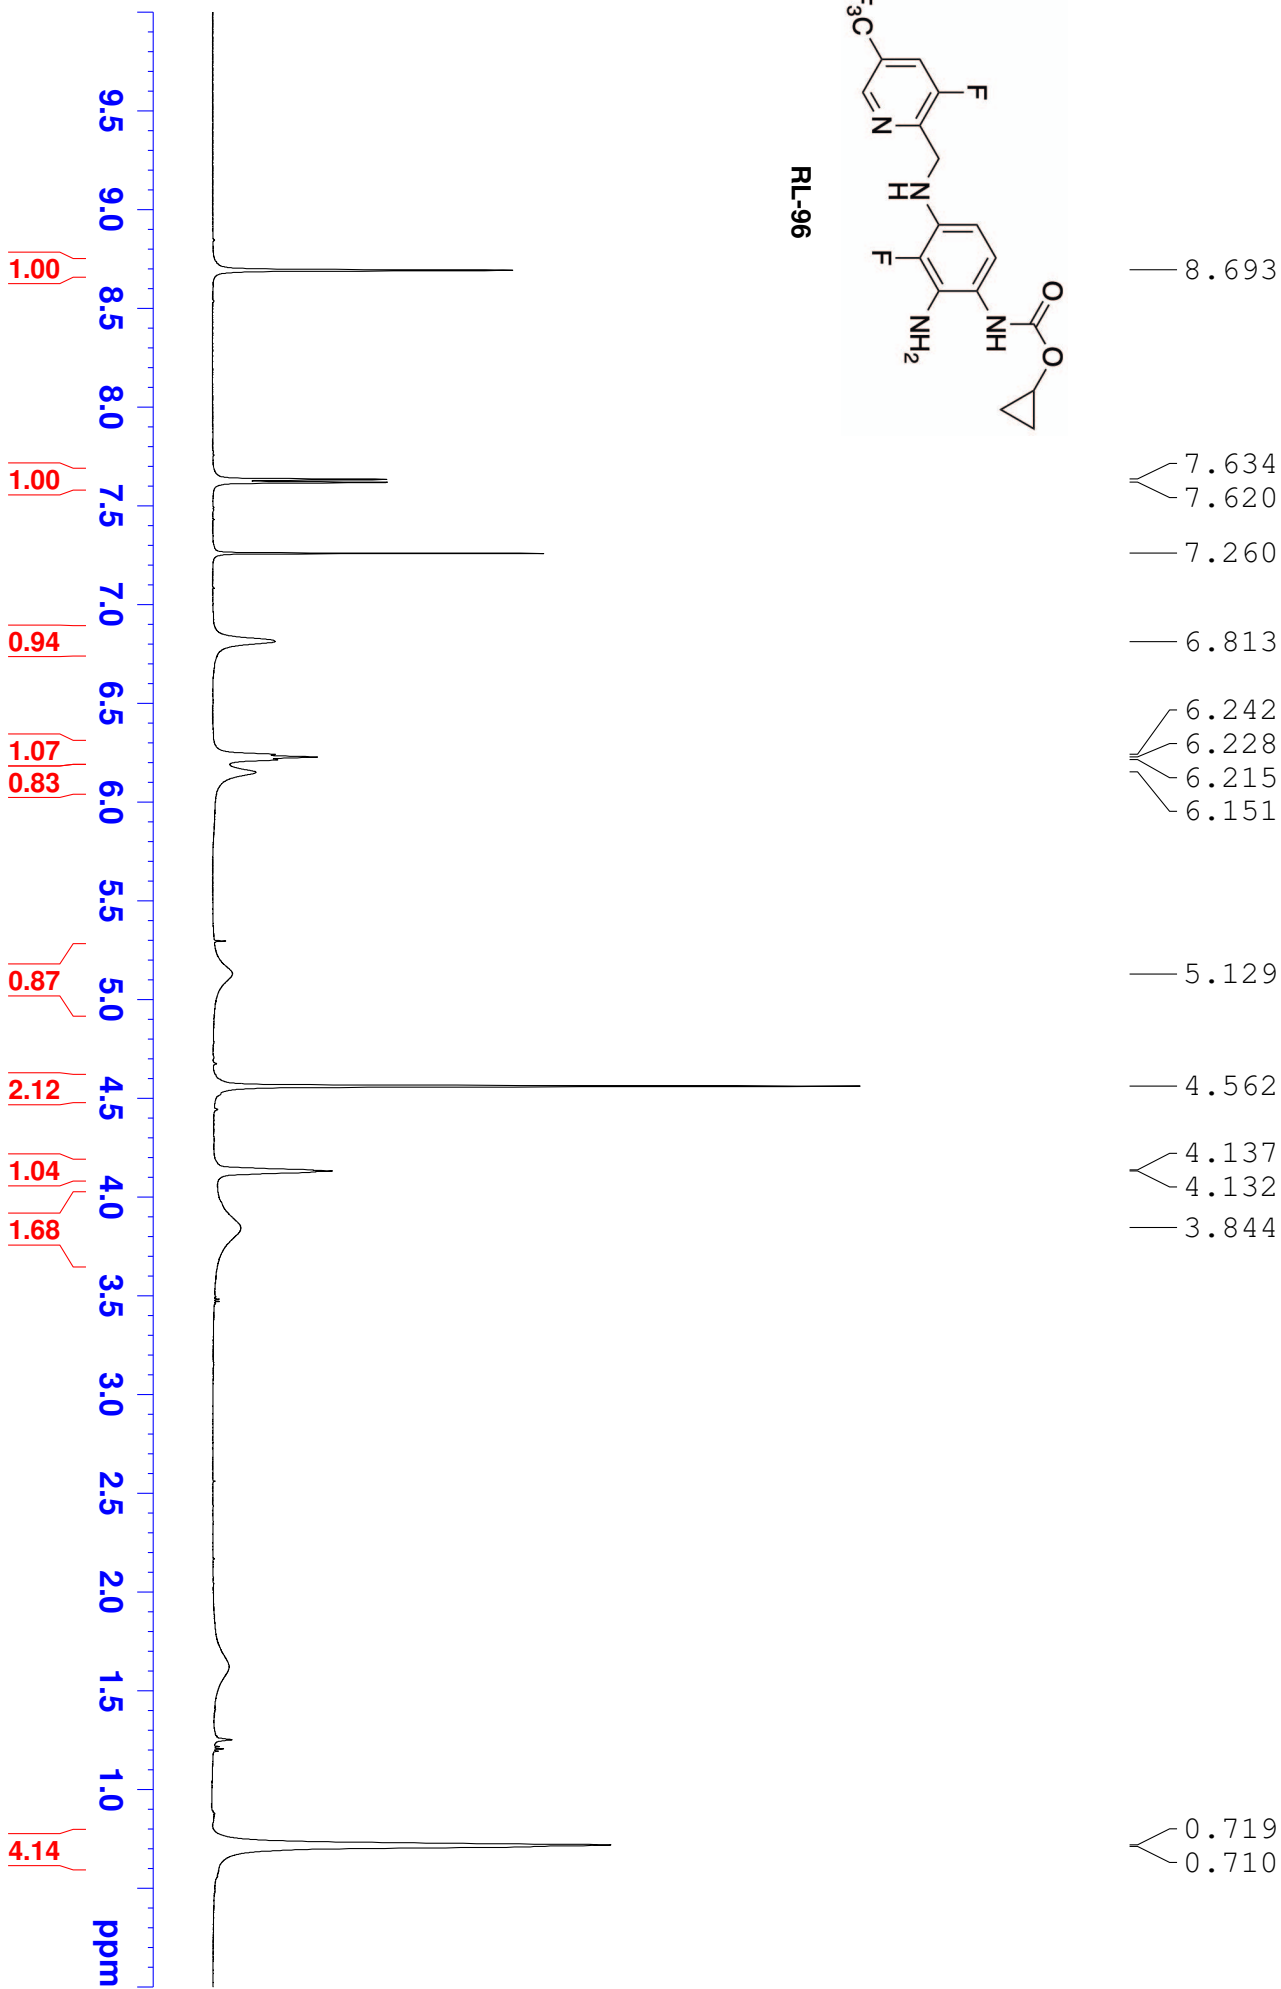

RL844.096 CDCl3 600MHz

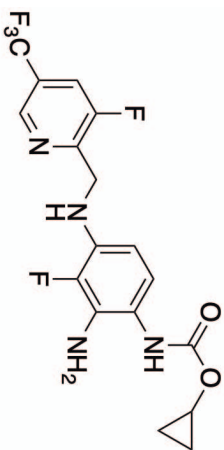

RL-96

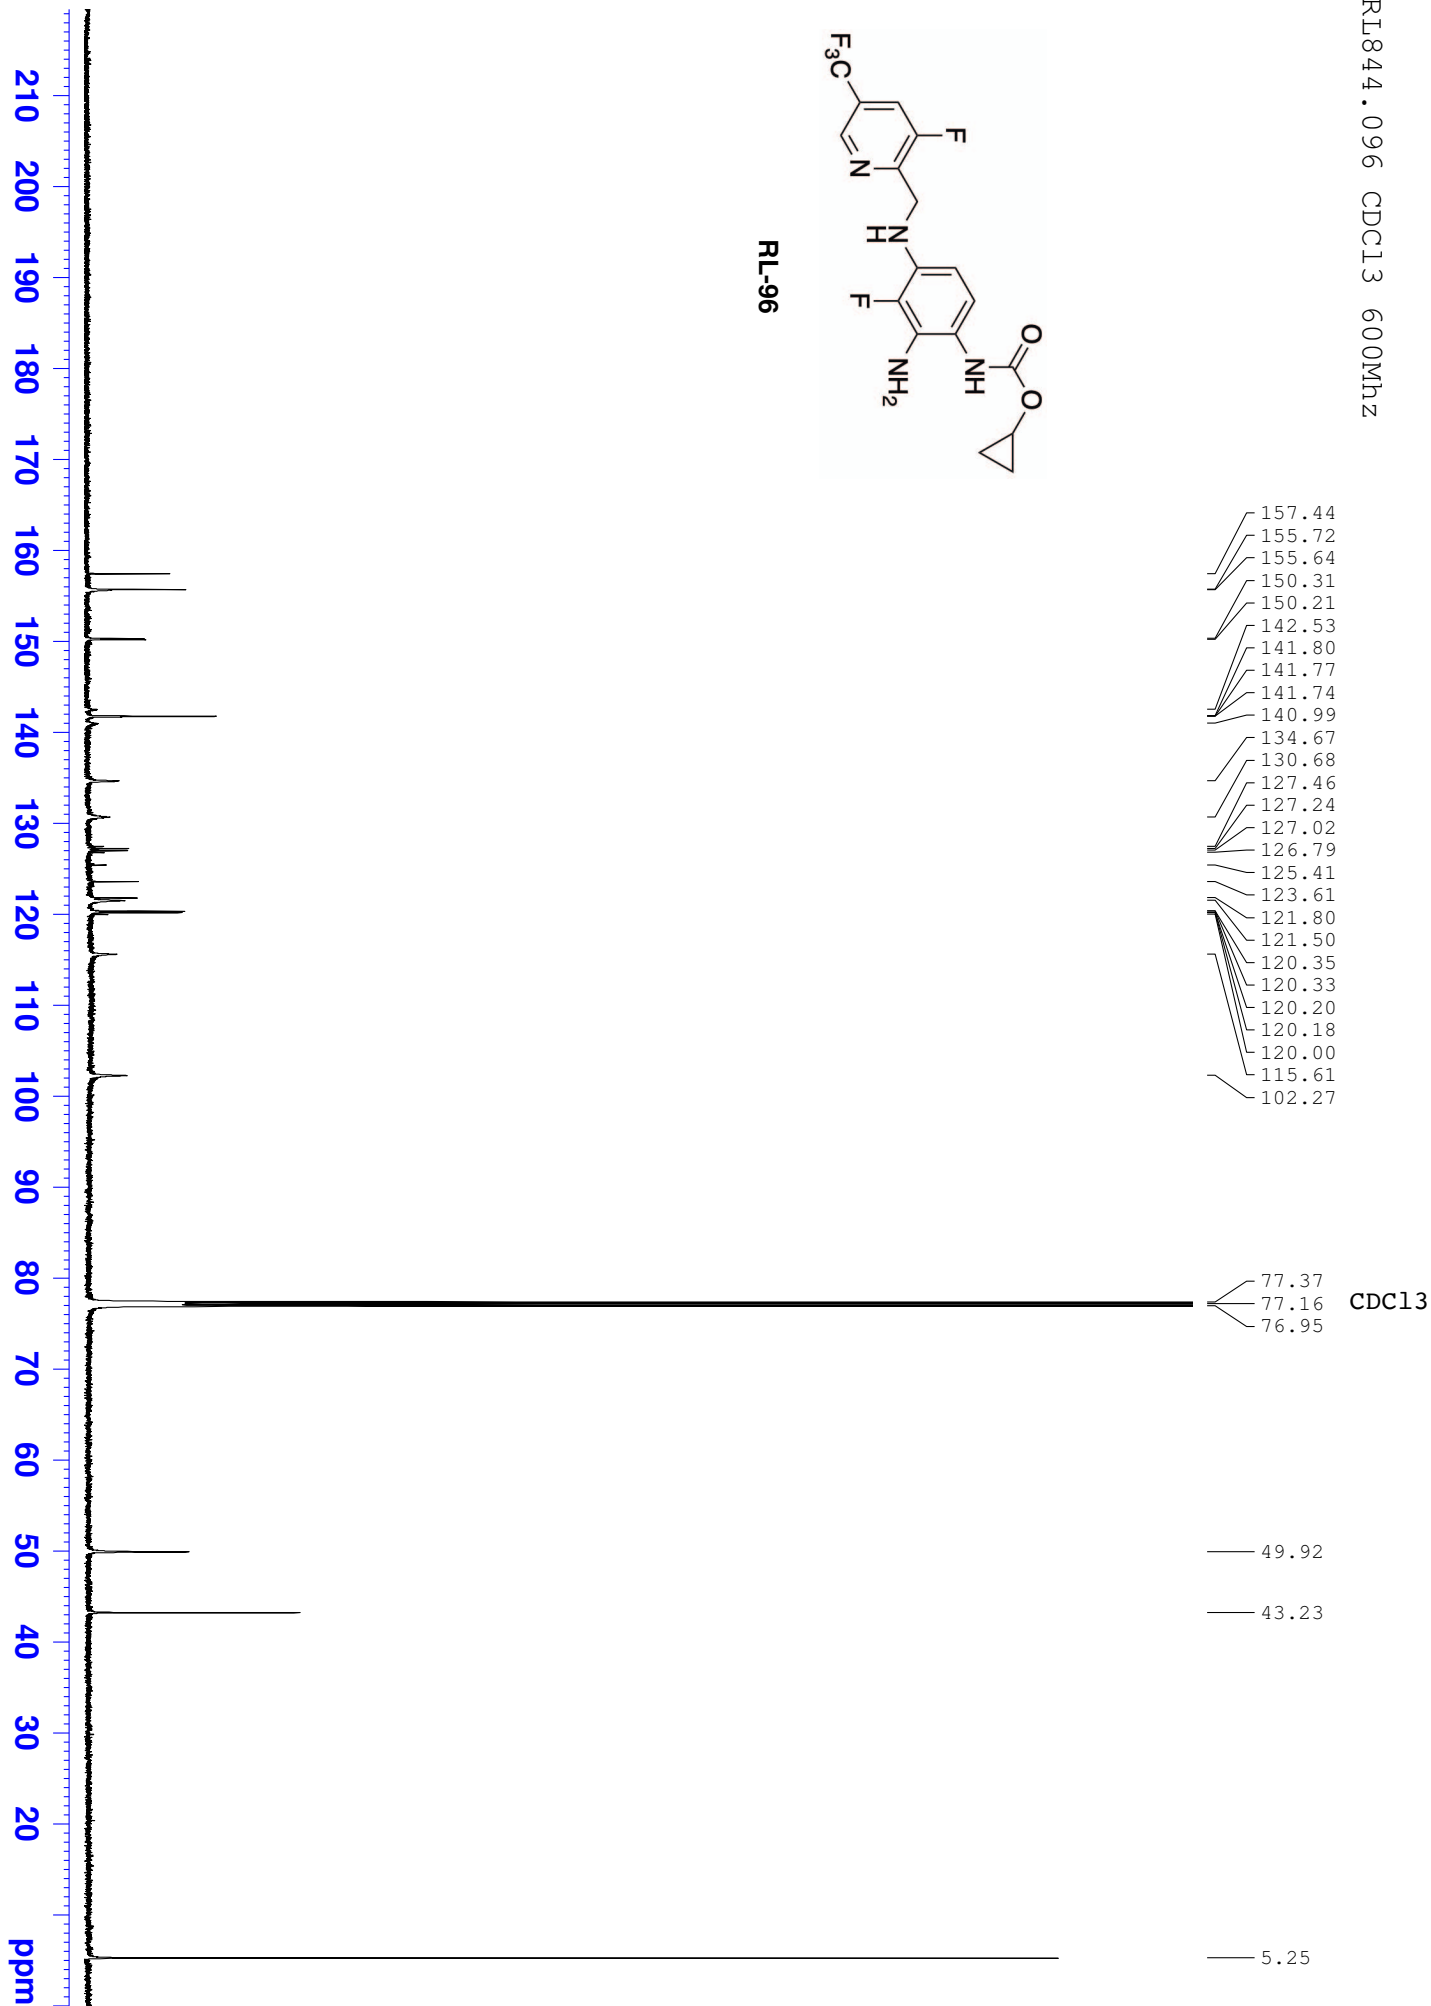

RI844.095 acetone-d6 400Mhz

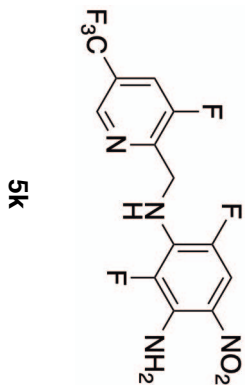

8.778

8.086

8.063

7.626

7.593

6.759

6.399

5.018

2.061

2.055

2.050

2.045

2.039

acetone-d6

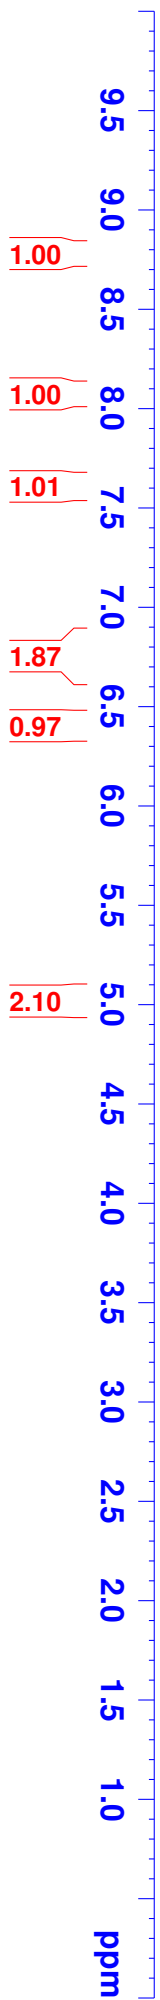

RI844.095 acetone-d6 400Mhz

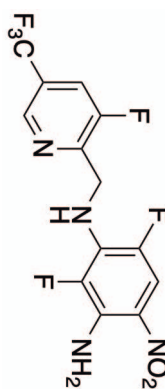

acetone-d6

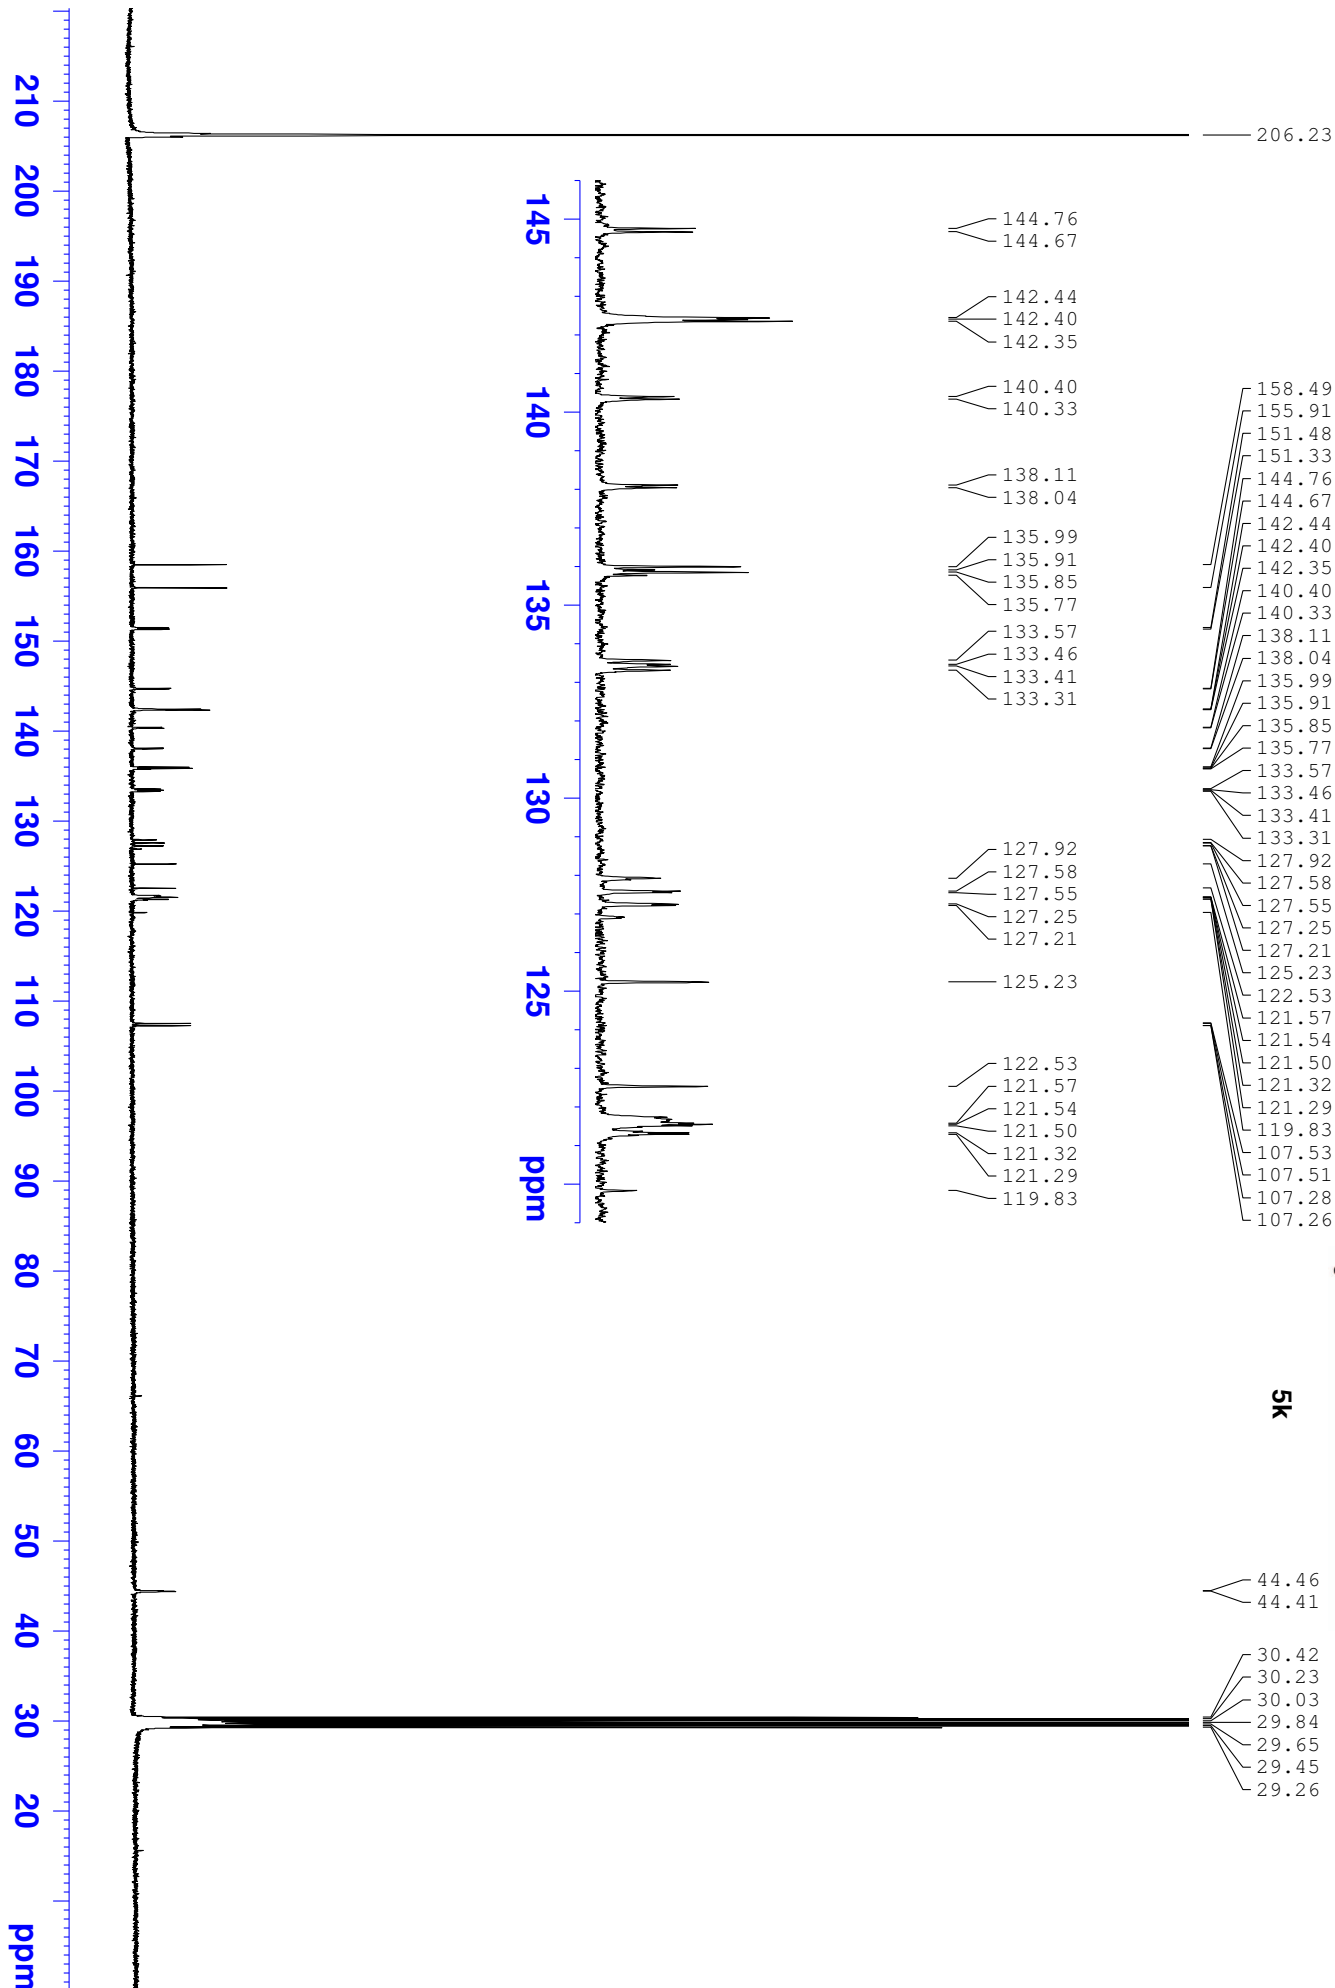

RL880.001 CDCl3 600MHz

CDCl3

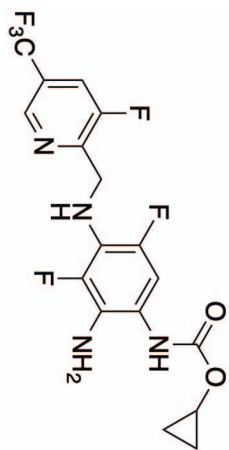

RL-01

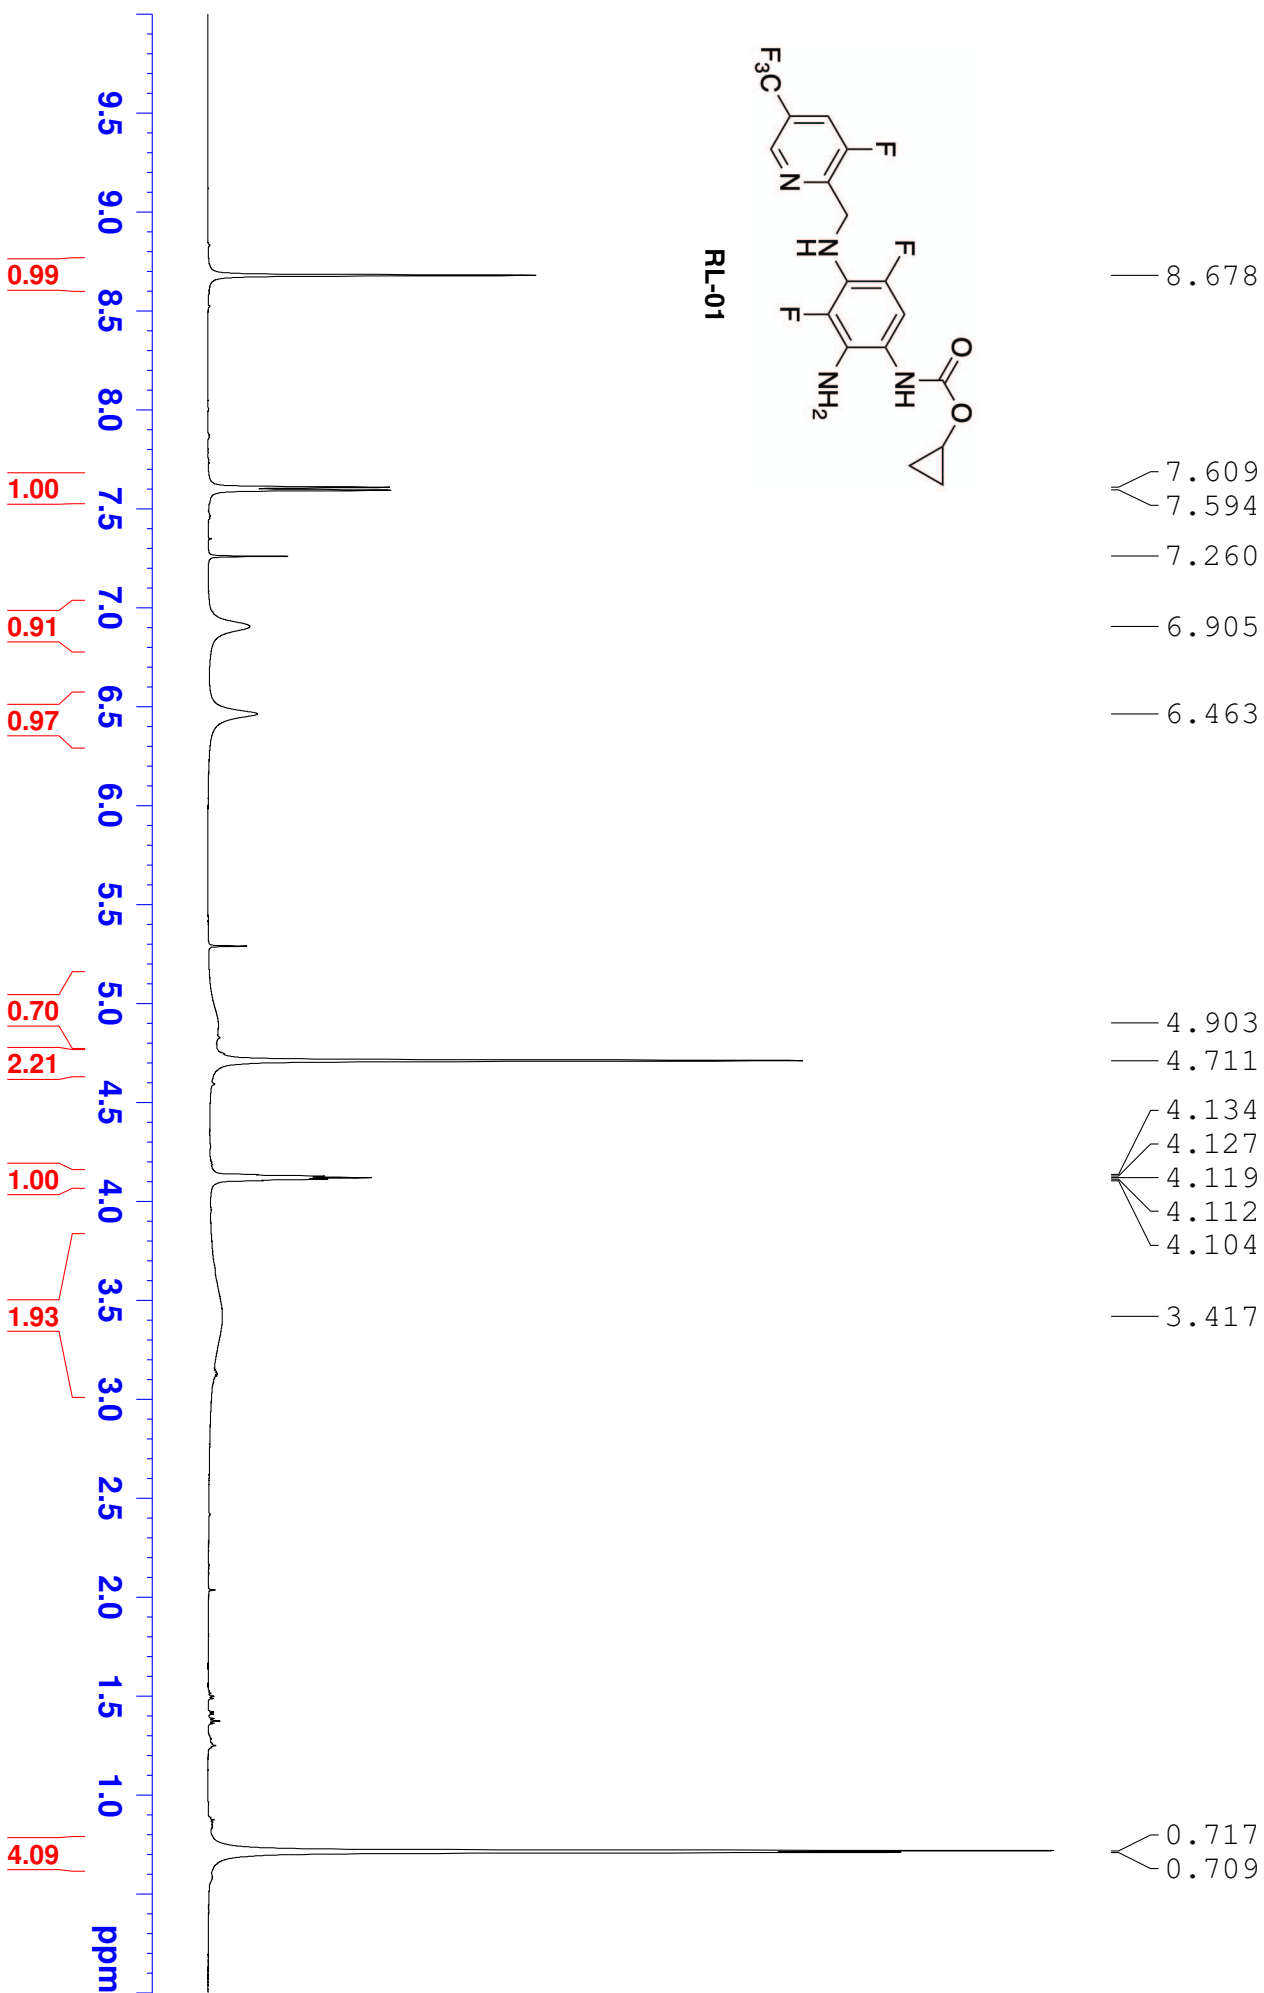

RL880.001 CDCl3 600MHz

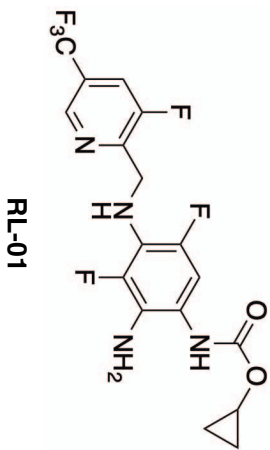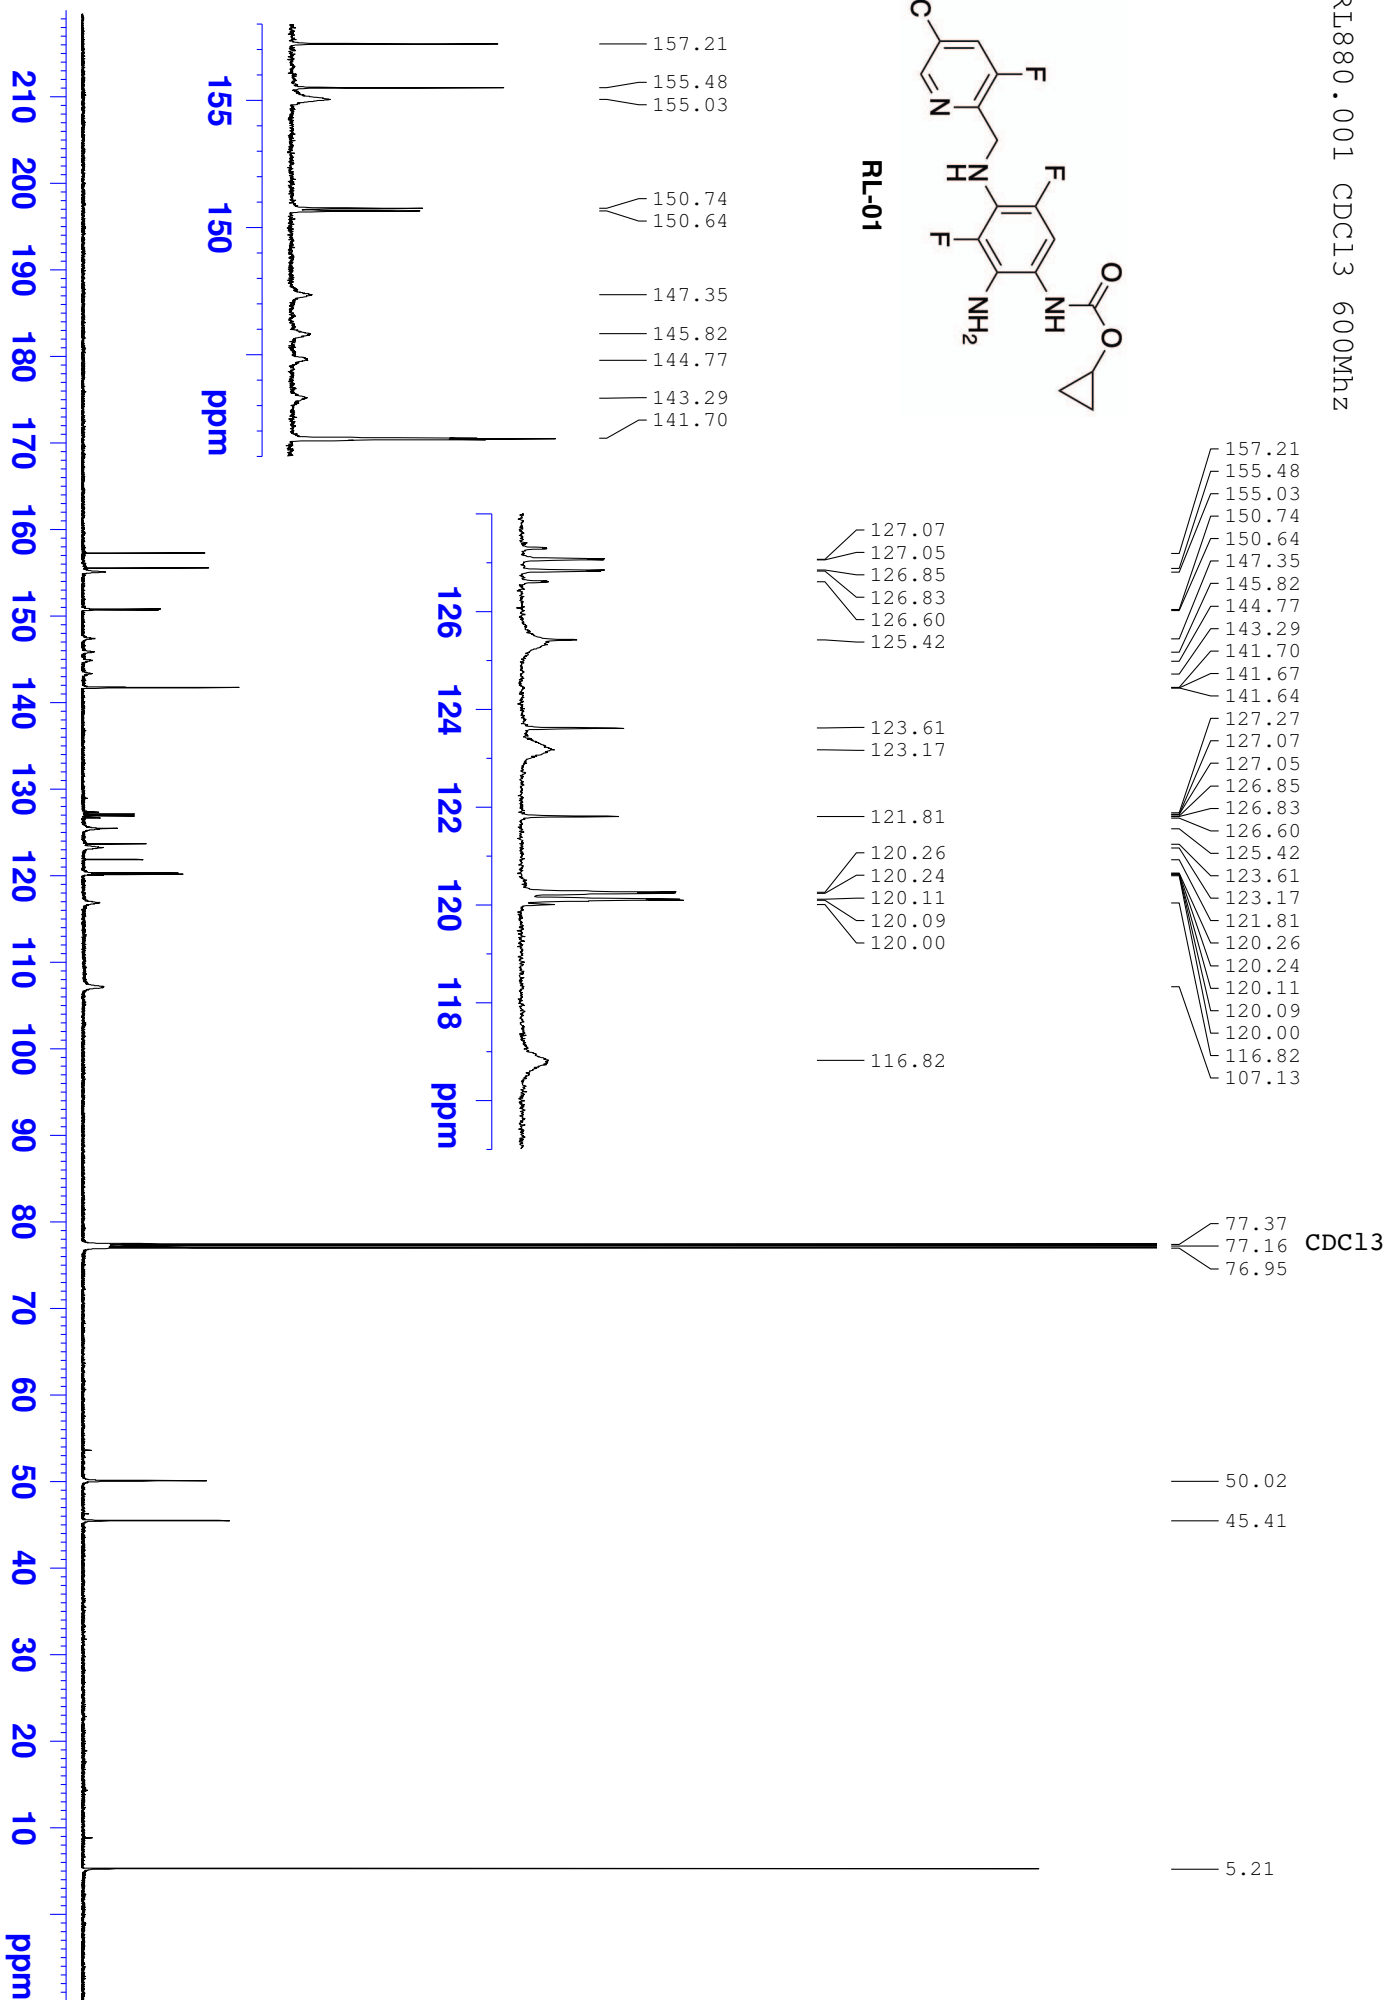



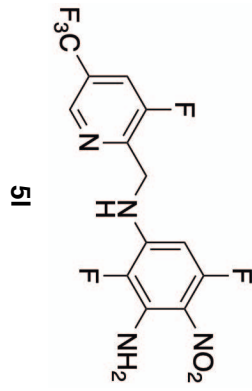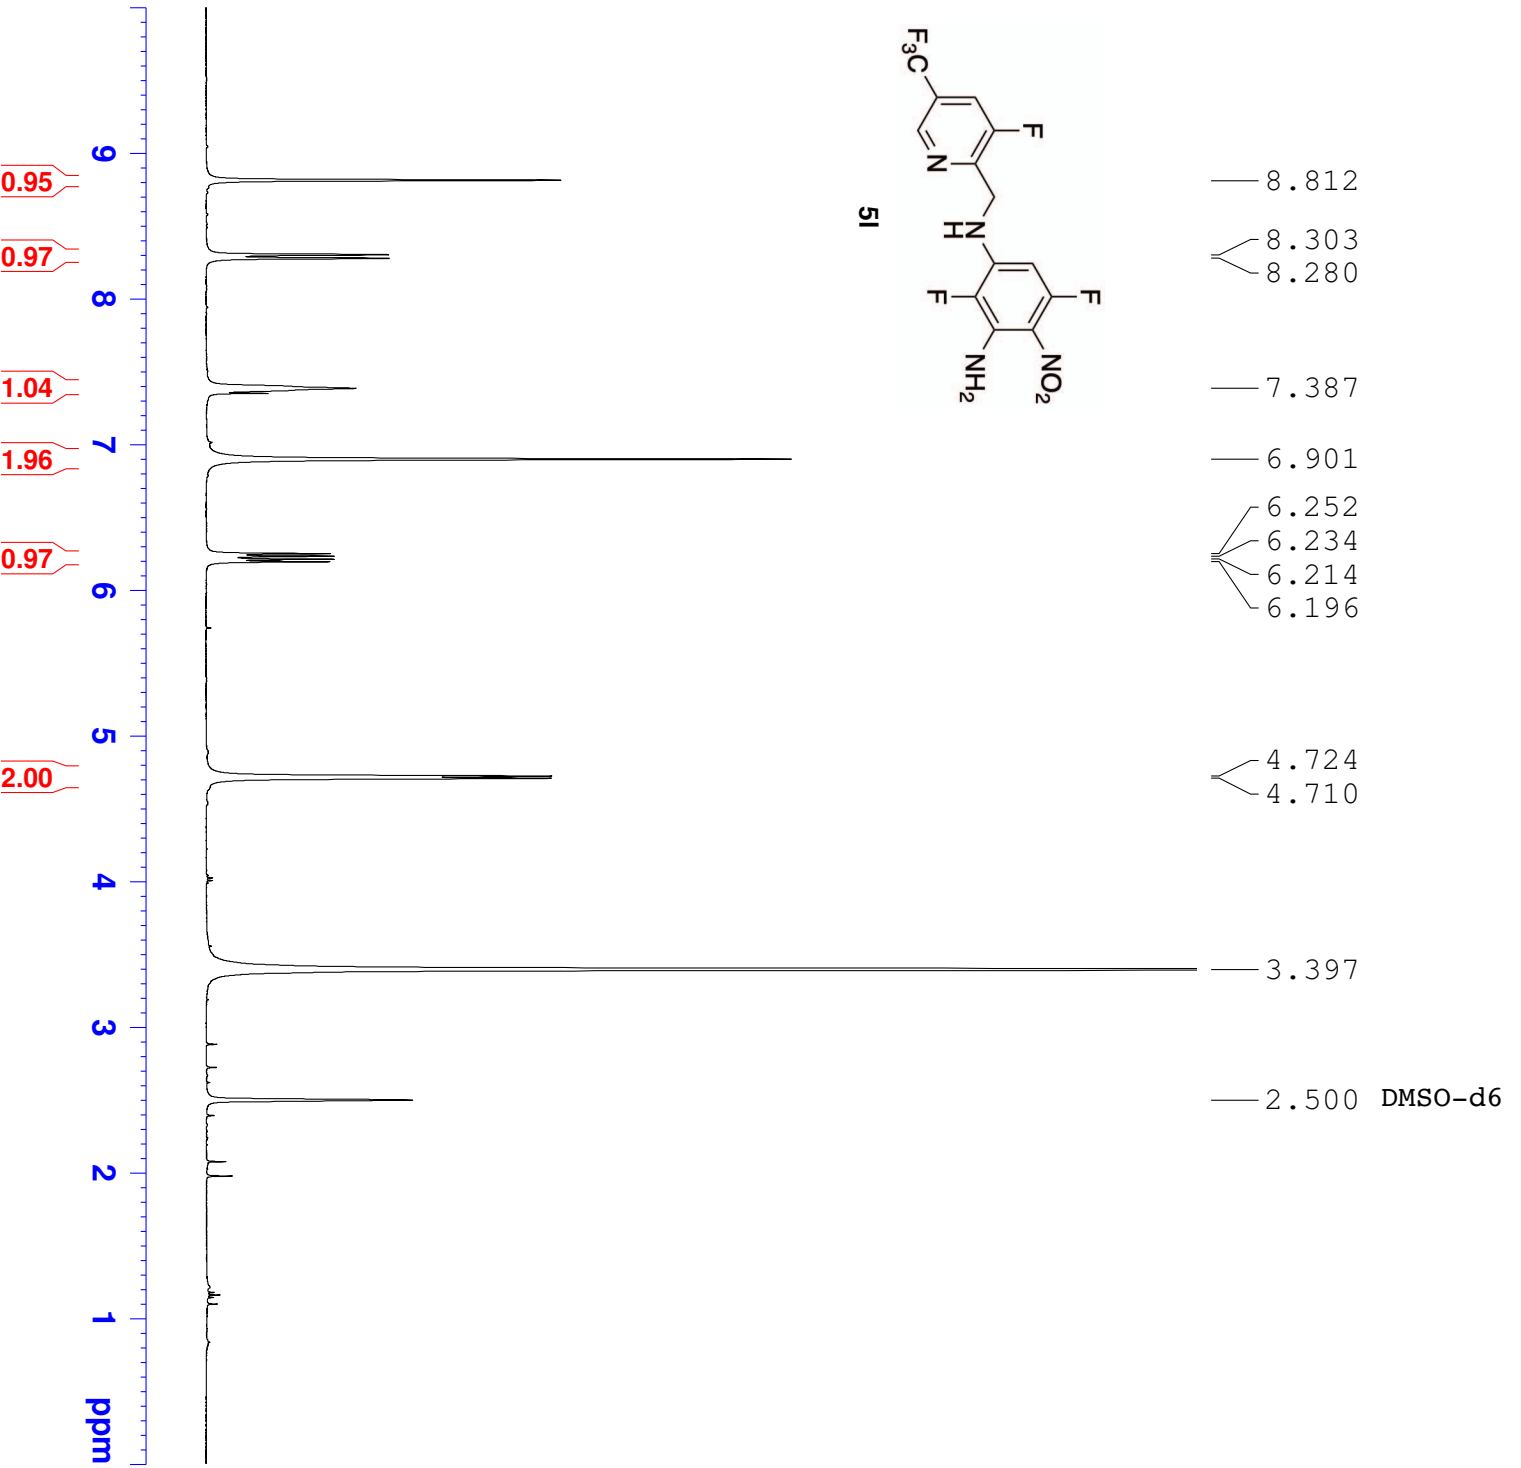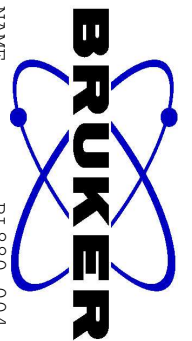

```

NAME          RL880.004
EXPNO         10
PROCNO        1
Date_         20180714
Time         15.21
INSTRUM       spect
PROBHD        5 mm PABBO BB-
PULPROG       zg30
TD            65536
SOLVENT       DMSO
NS            16
DS            2
SWH           8012.820 Hz
FIDRES        0.122266 Hz
AQ            4.0894966 sec
RG            57
DE            62.400 usec
TE            -2673.8 K
D1            1.00000000 sec
TD0           1
    
```

```

===== CHANNEL f1 =====
SF01          400.1324710 MHz
NUC1          1H
P1            14.50 usec
SI            65536
SF            400.1300035 MHz
WDW           EM
SSB           0
LB            0.30 Hz
GB            0
PC            1.00
    
```

RL880.004 DMSO-d6 600MHz

DMSO-d6

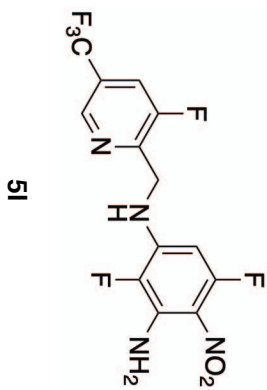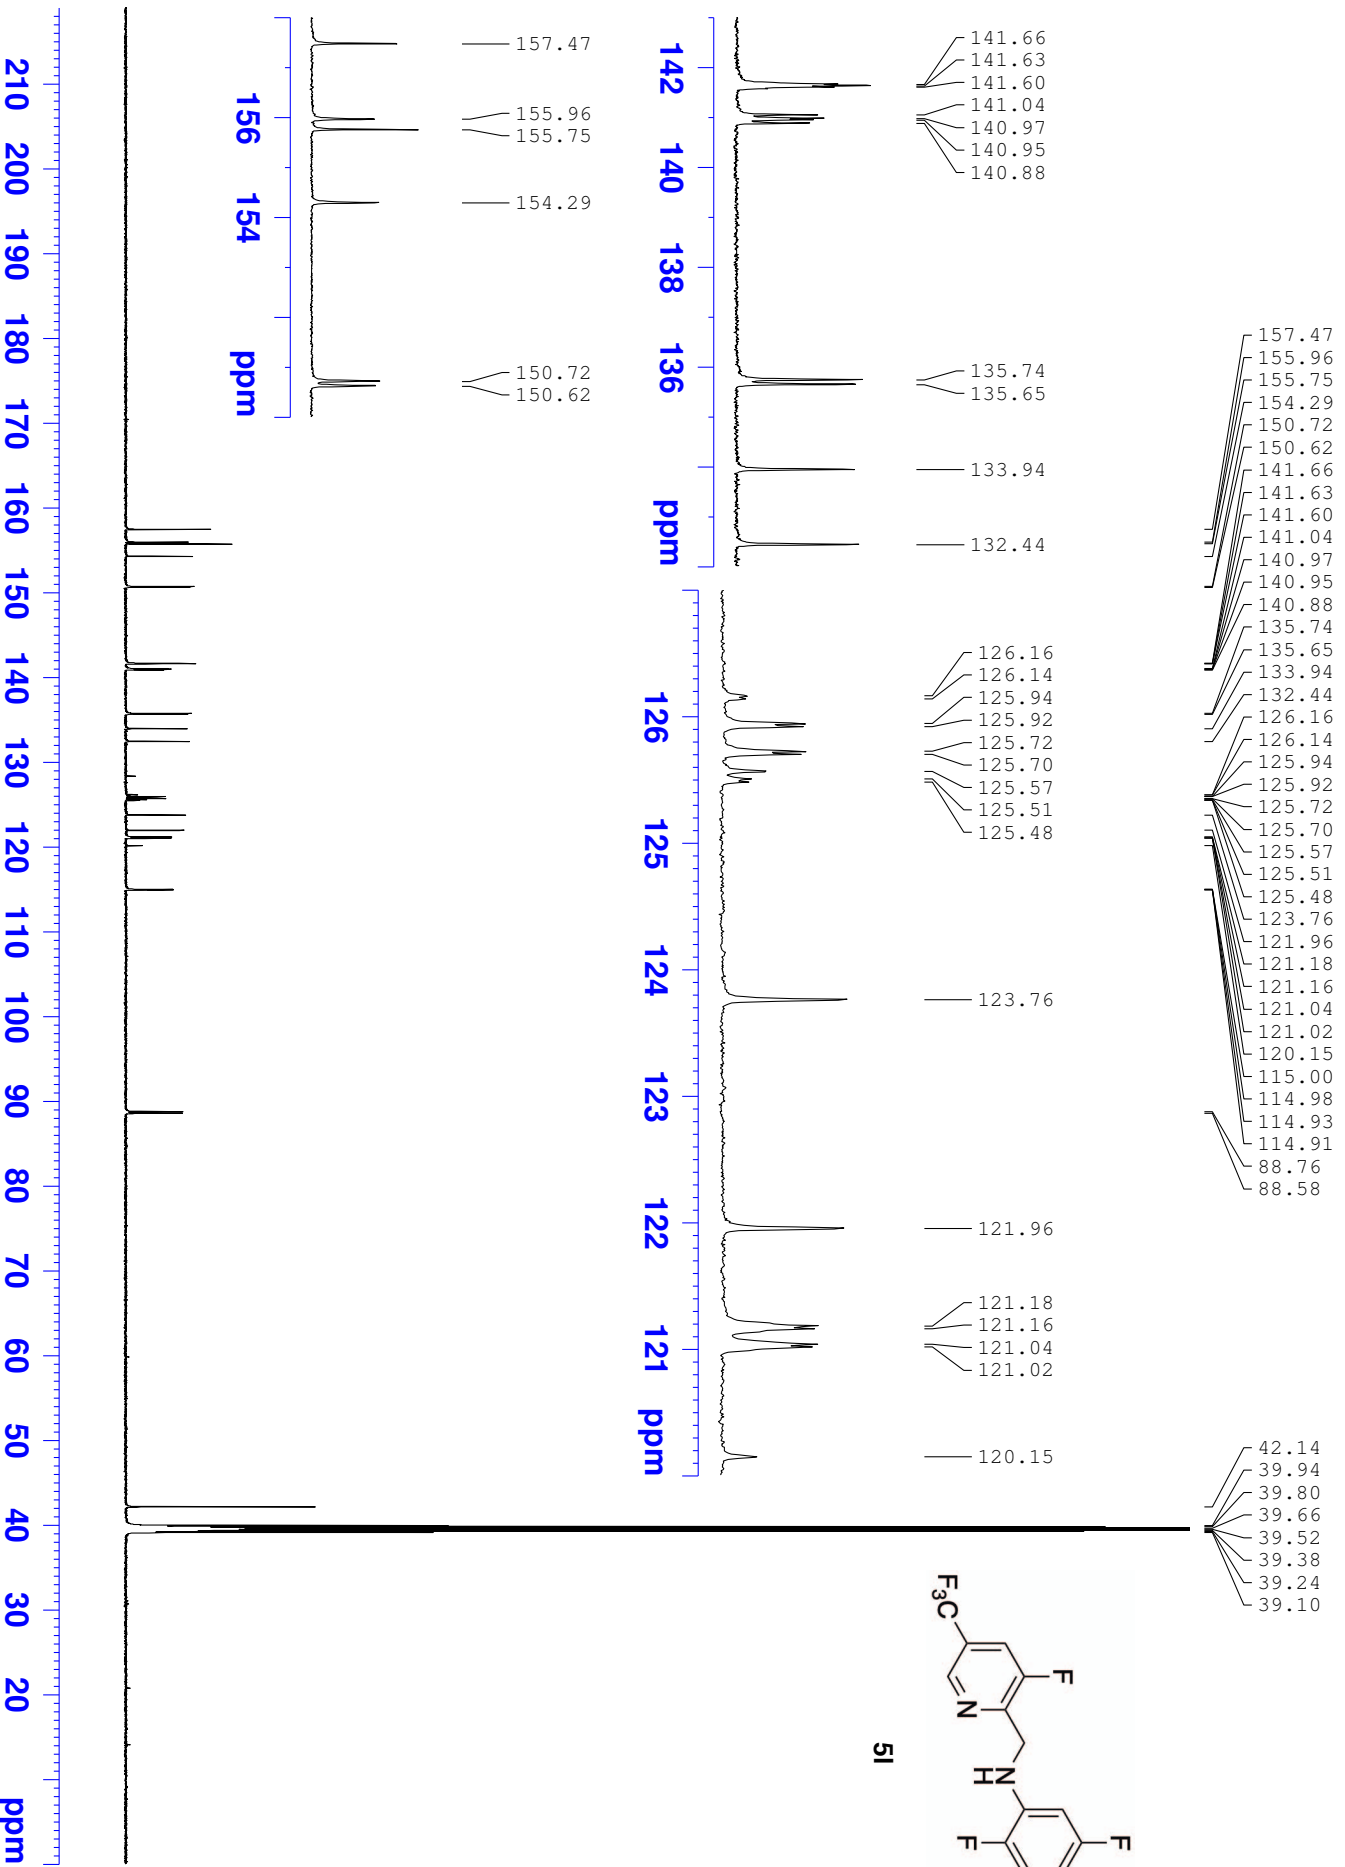

RL880.012 DMSO-d6 600MHz

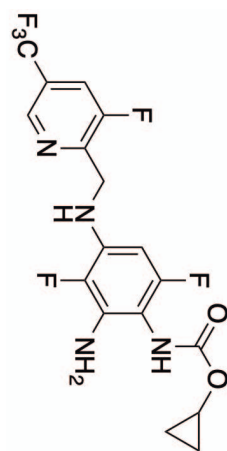

RL-12

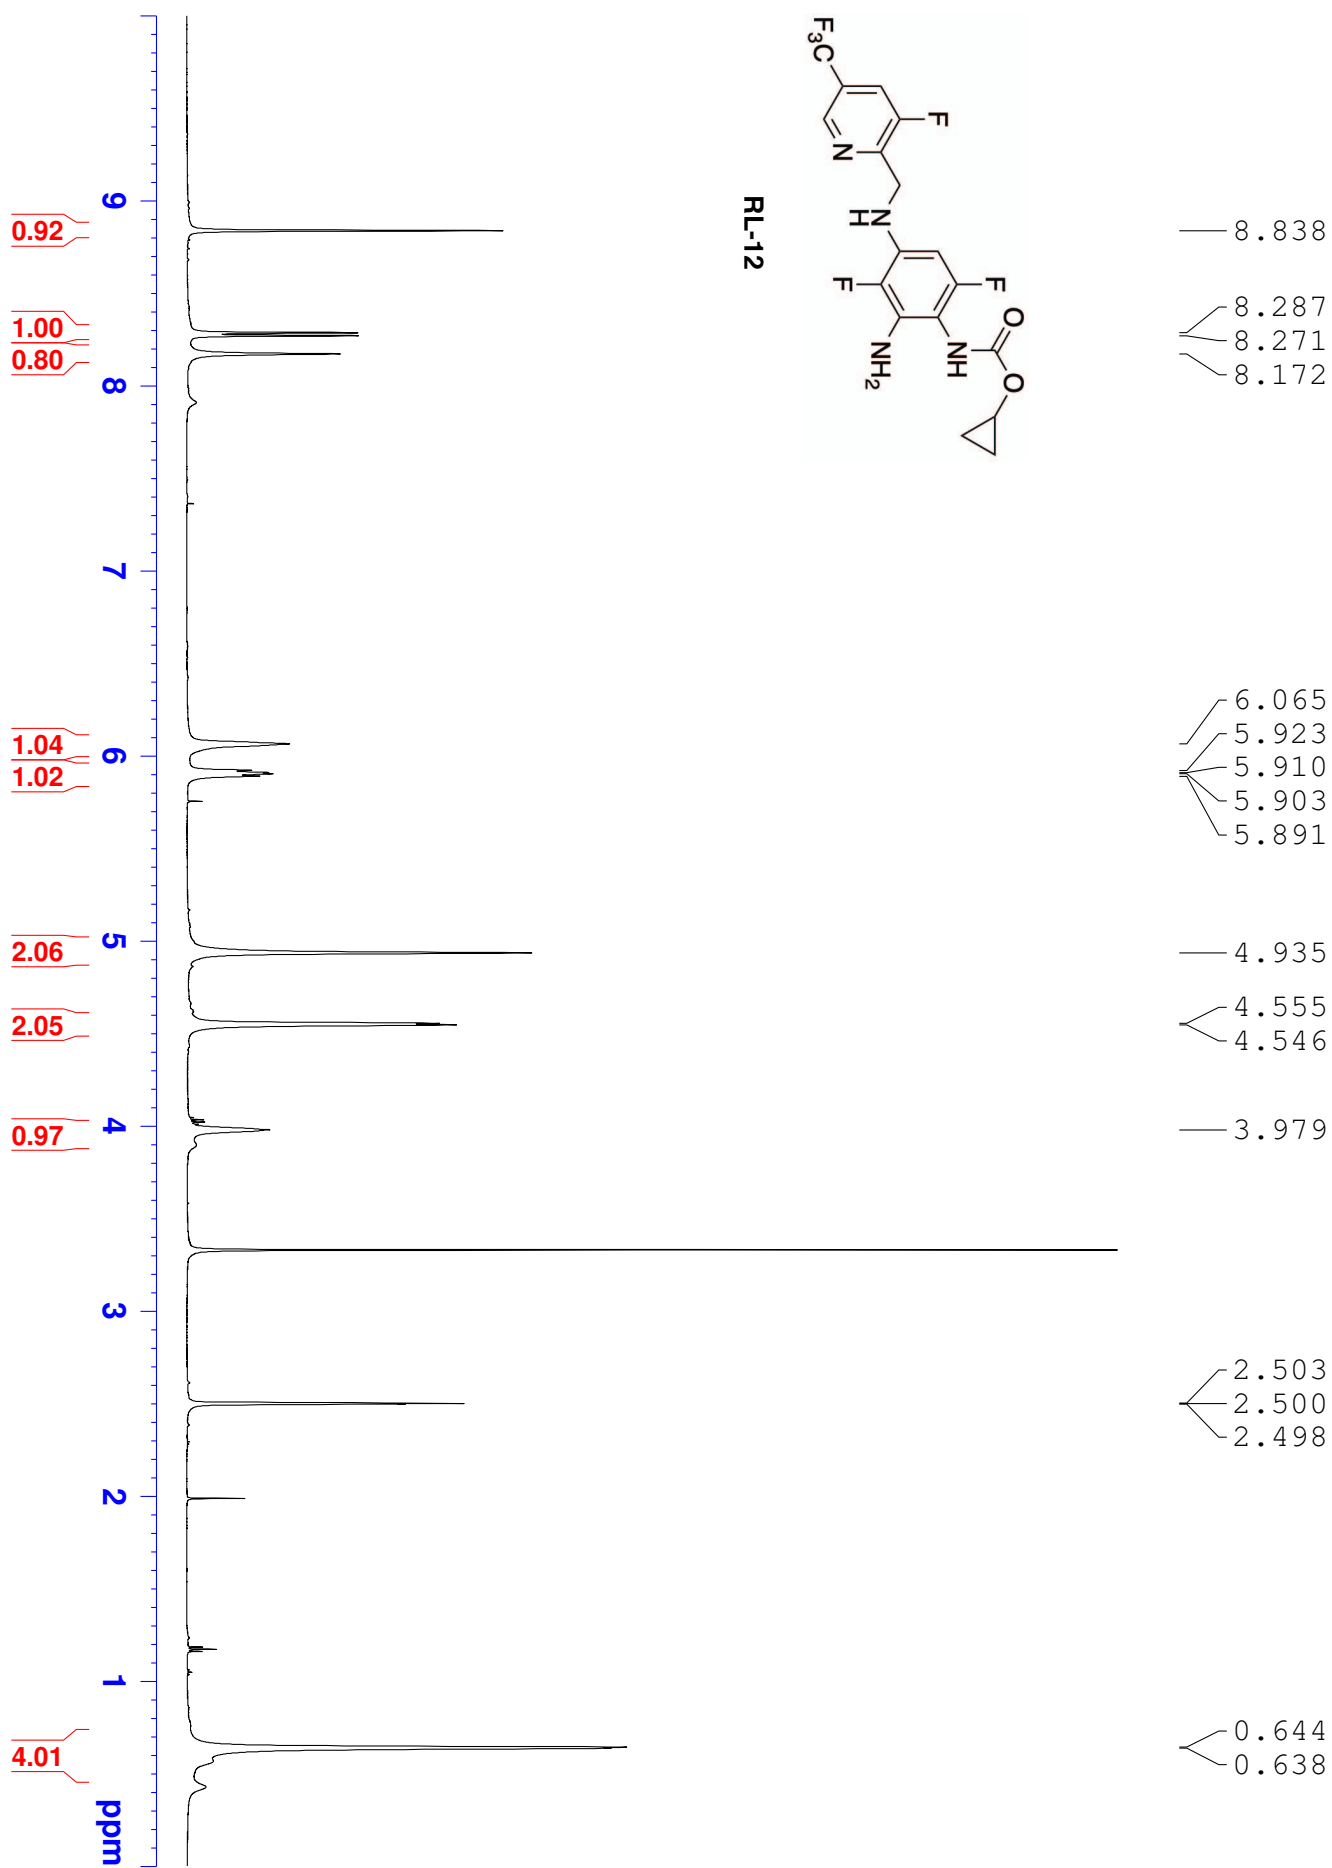

DMSO-d6

RL880.012 DMSO-d6 600MHz

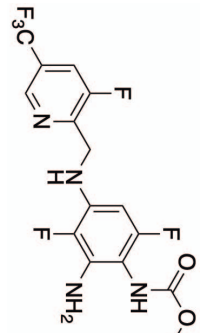

RL-12

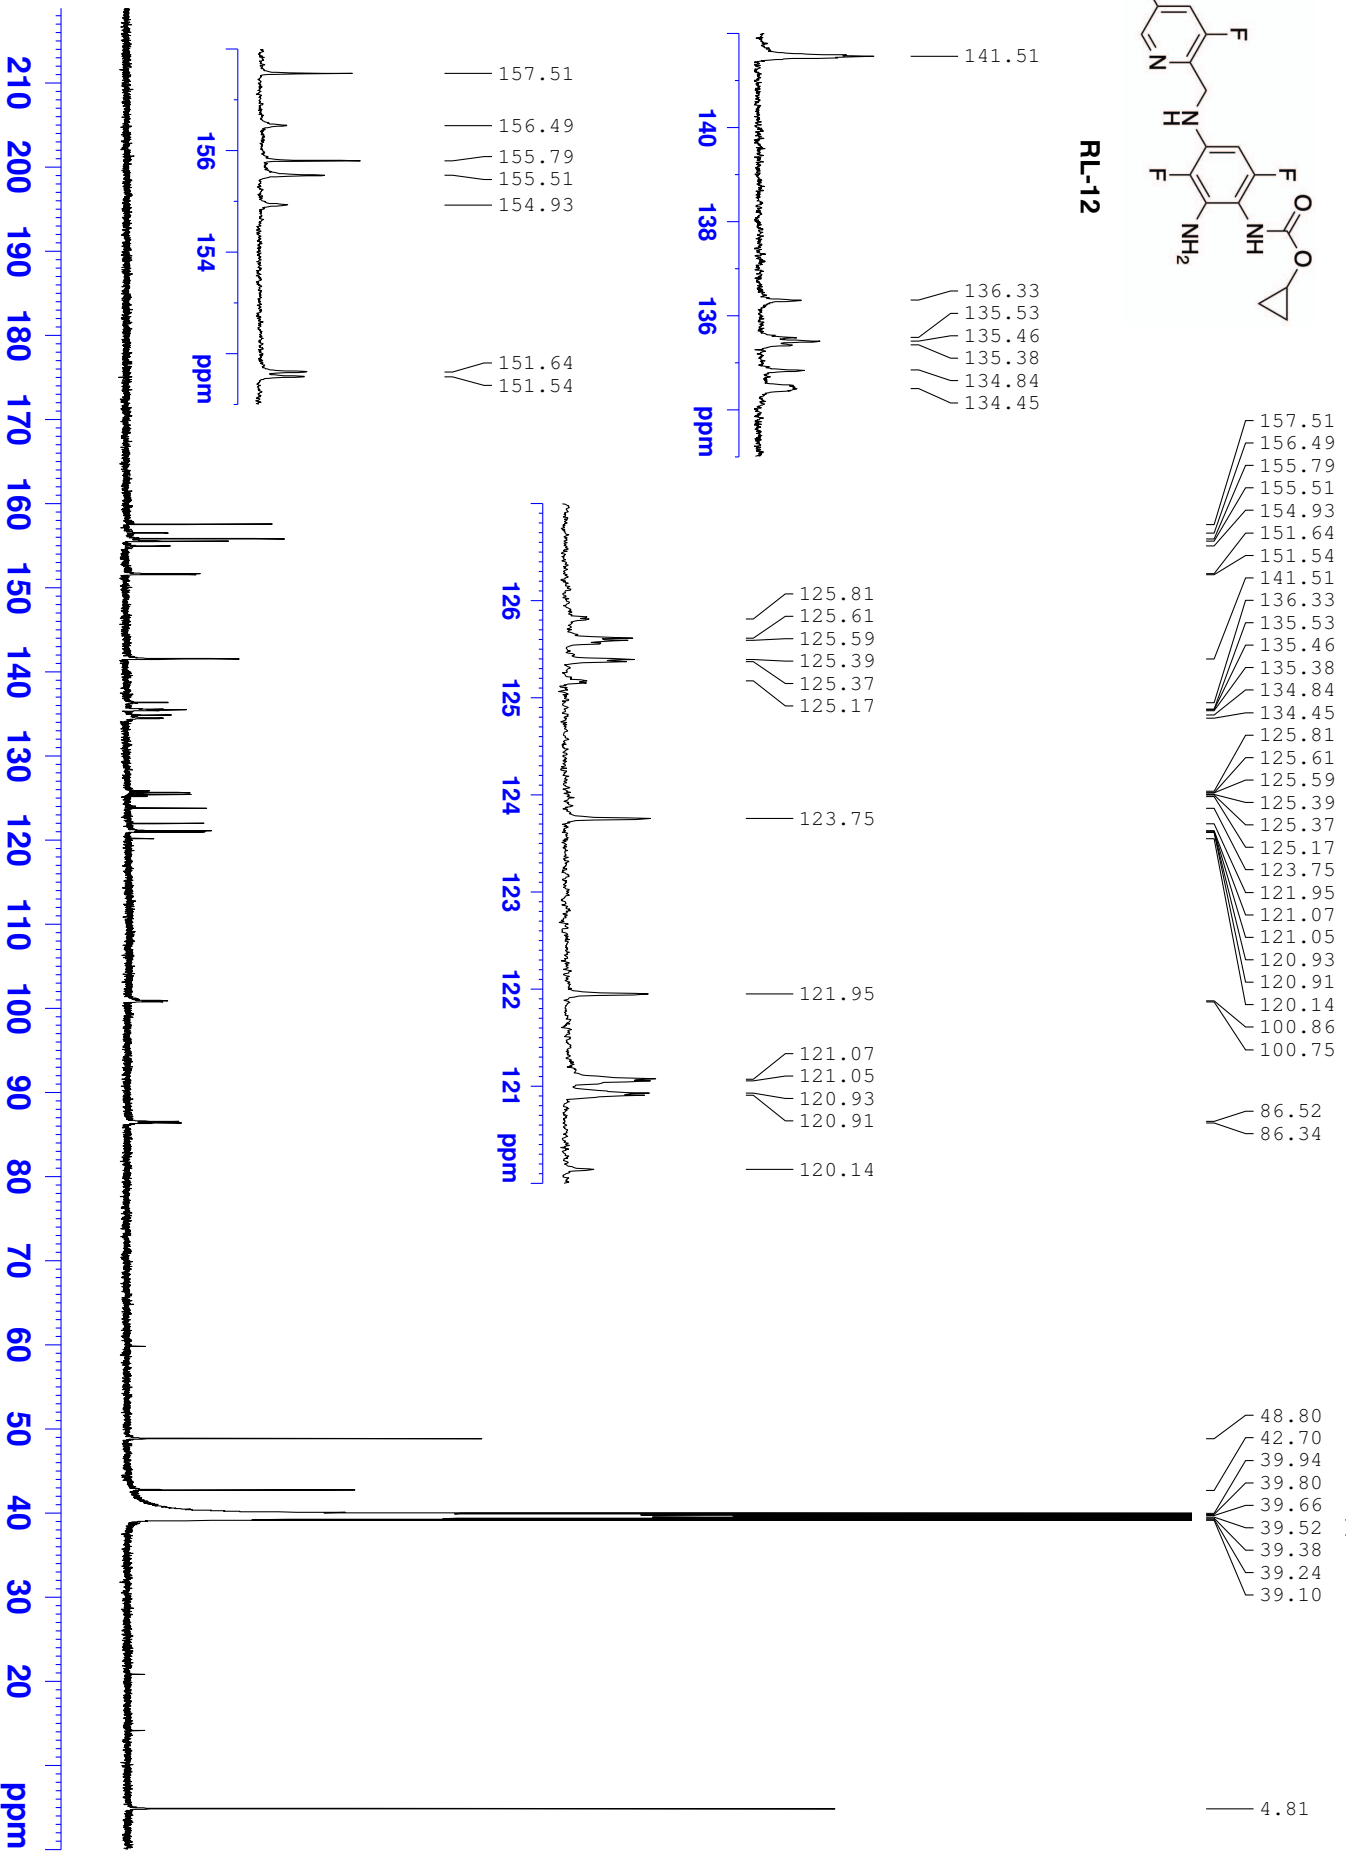

DMSO-d6

RI702.012 Acetone-d6 400b

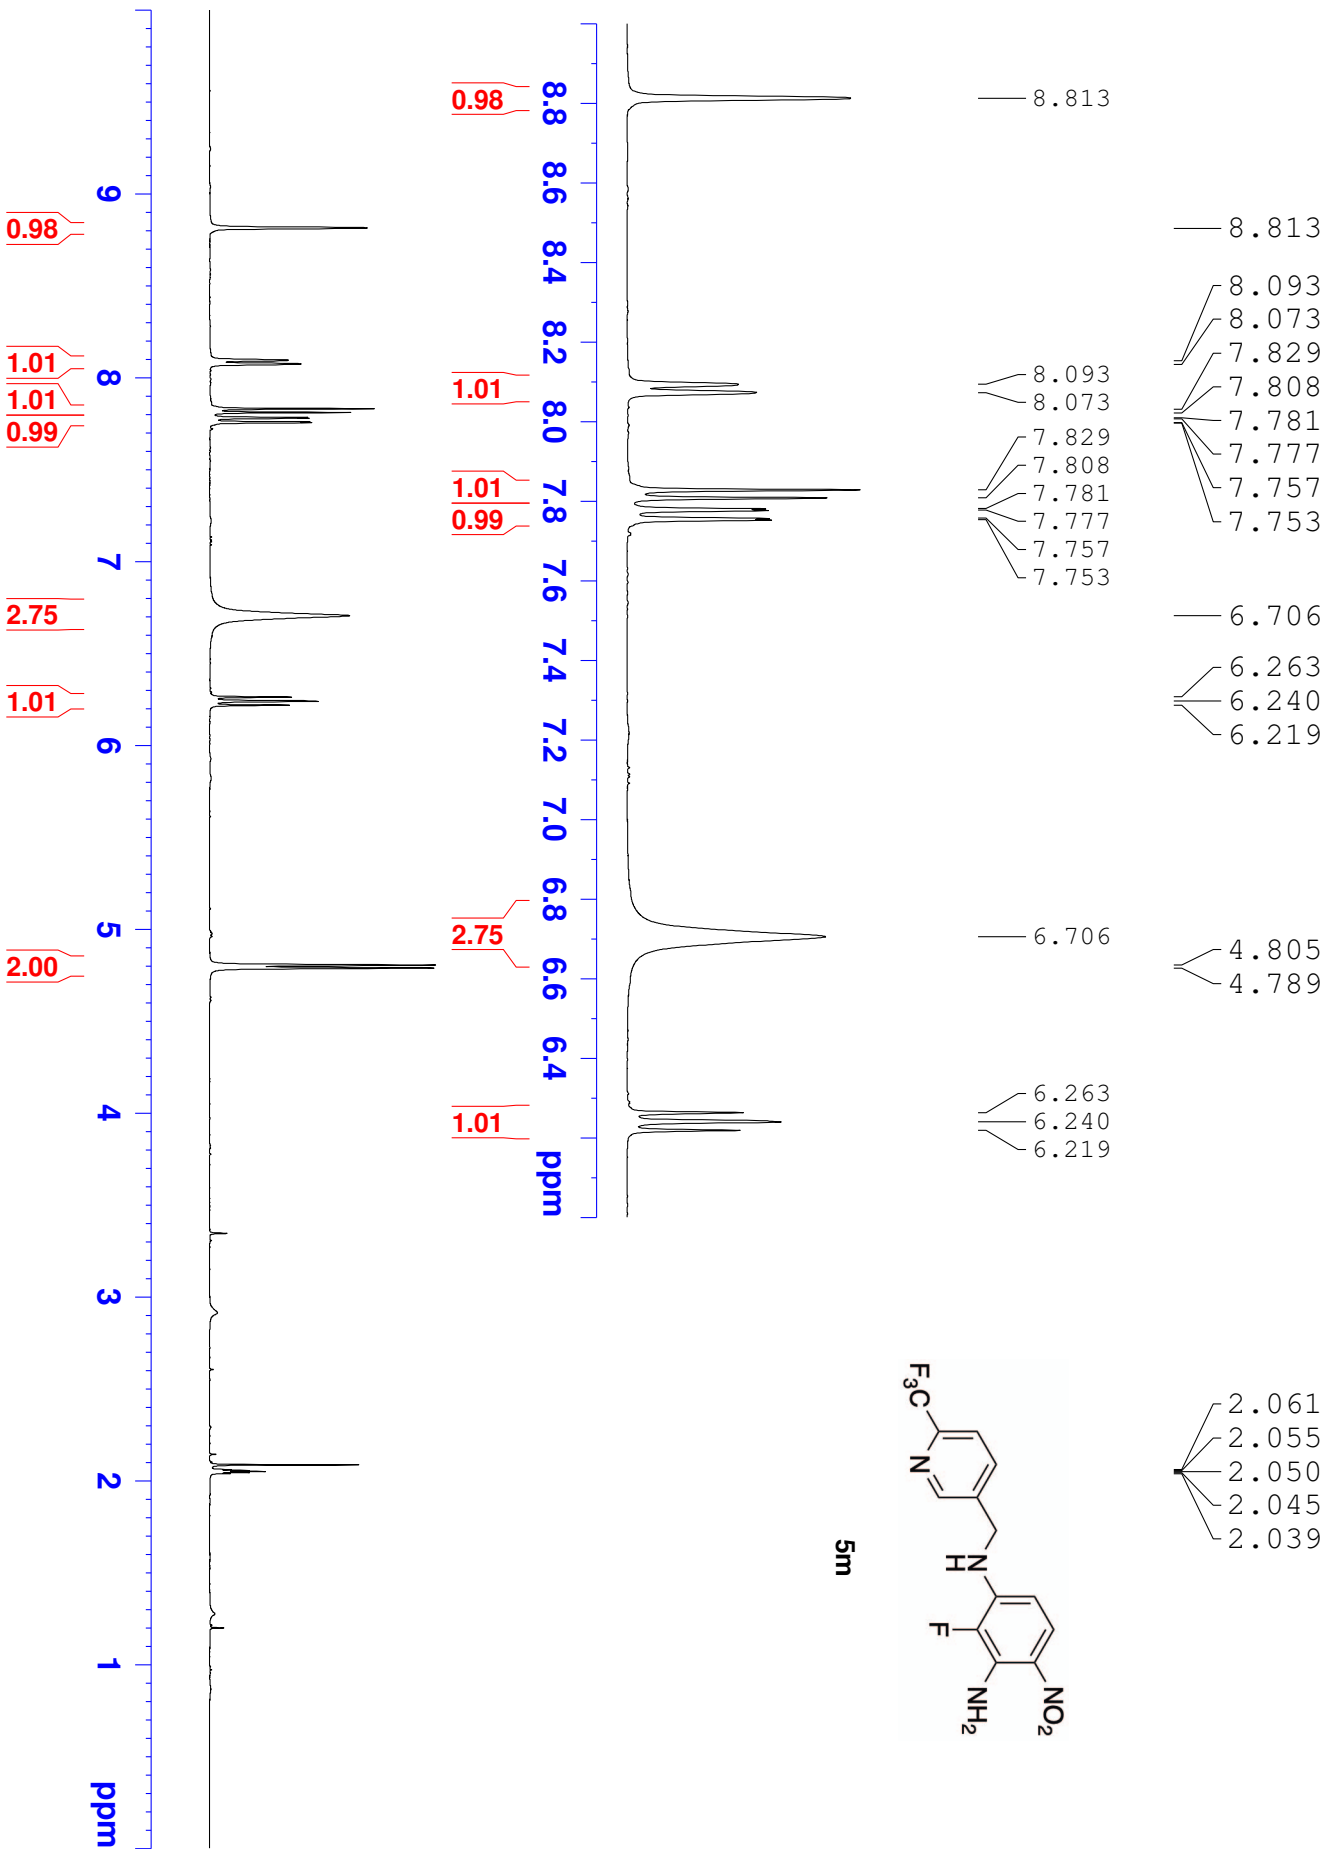

acetone-d6

RL702.012 Acetone-d6 400b

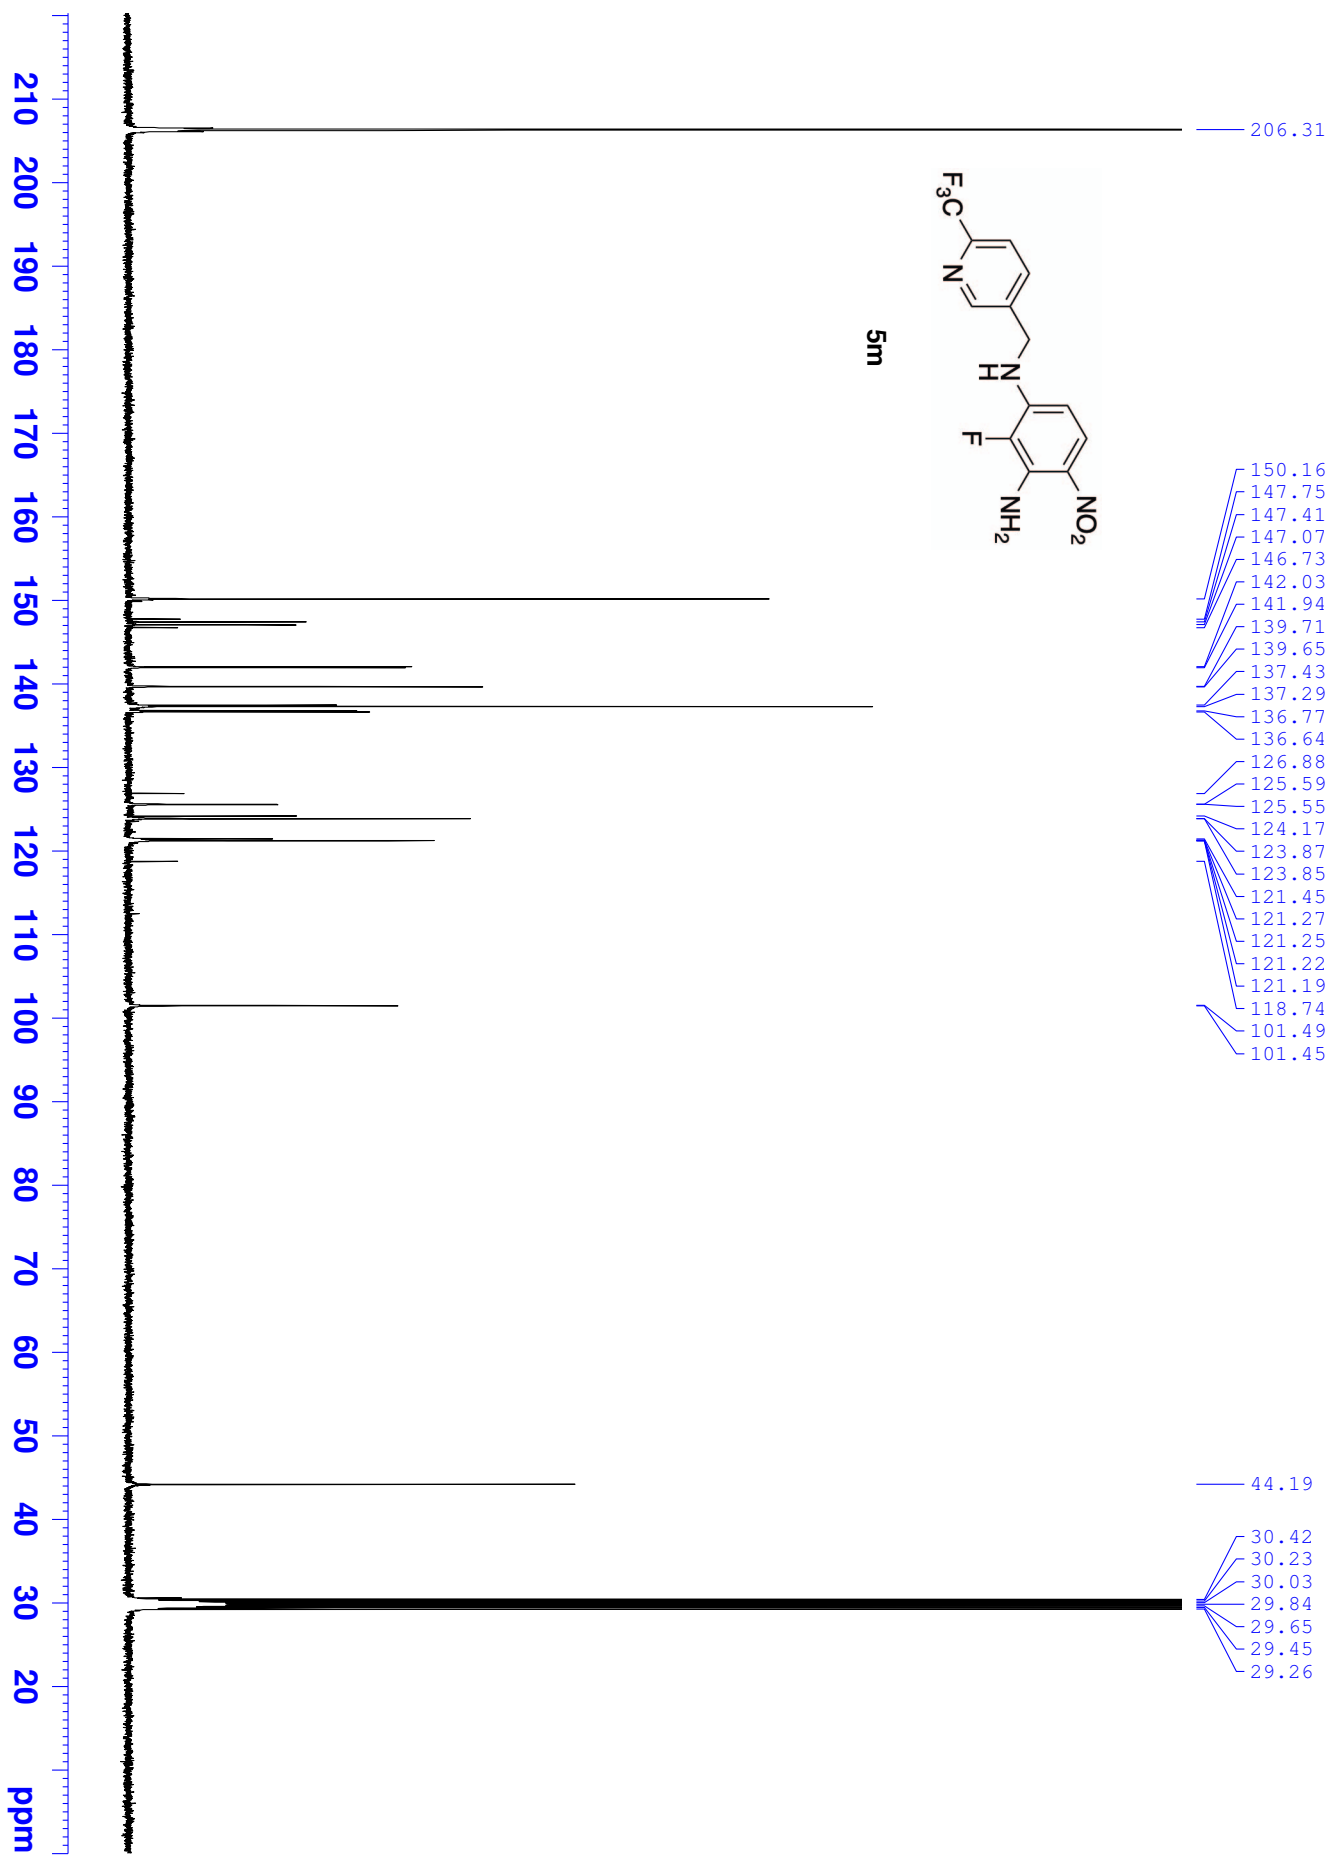

RL702.024 CDCl3 500MHz

CDCl3

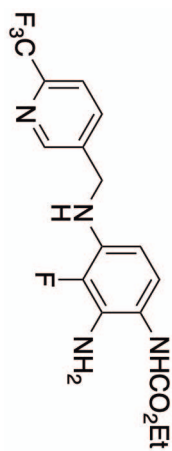

RL-24

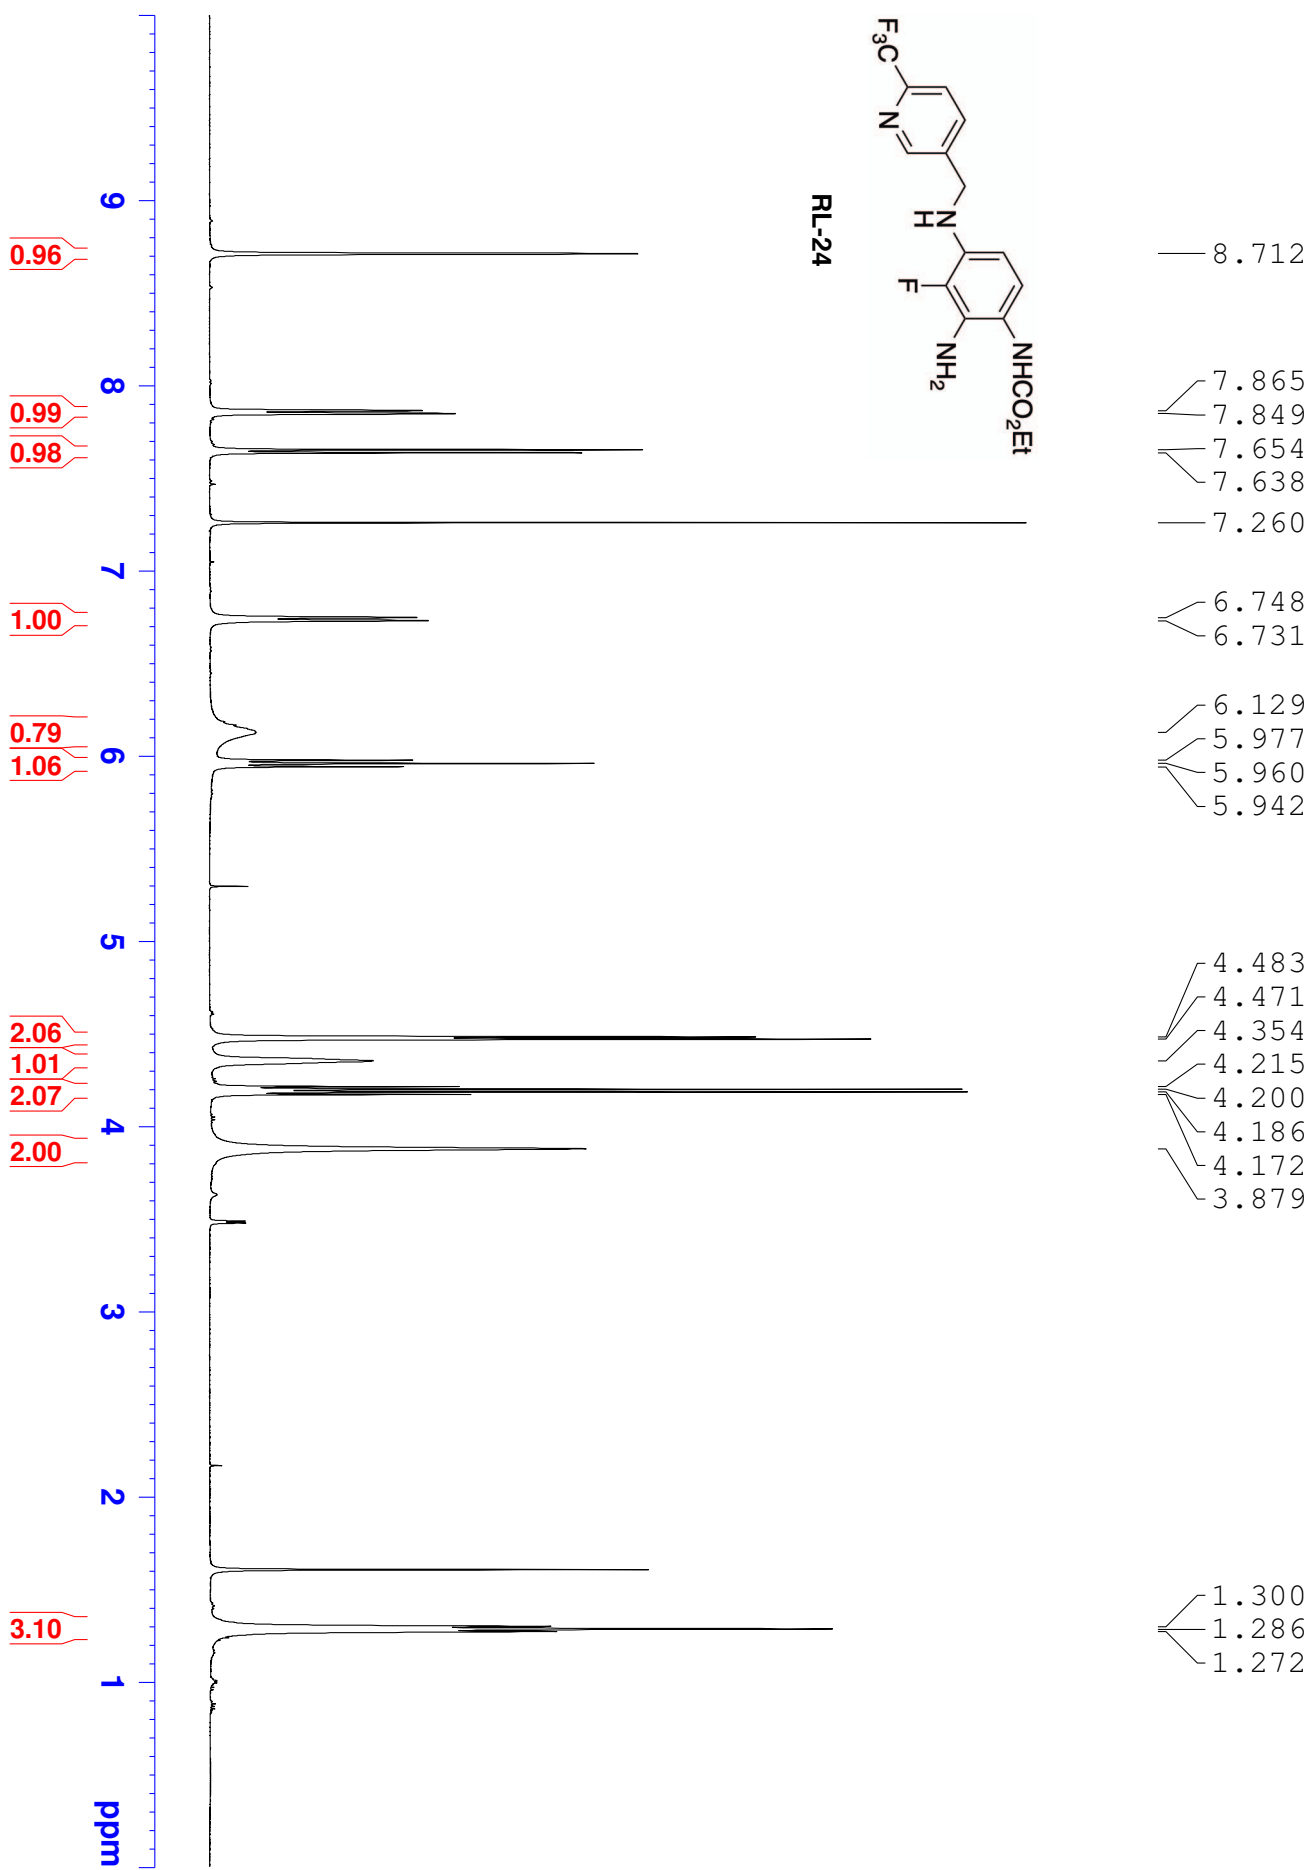

RL702.024 CDCl3 400b

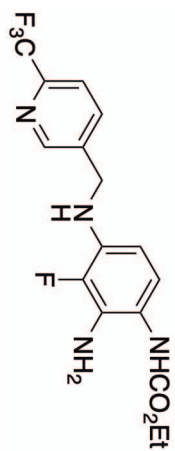

RL-24

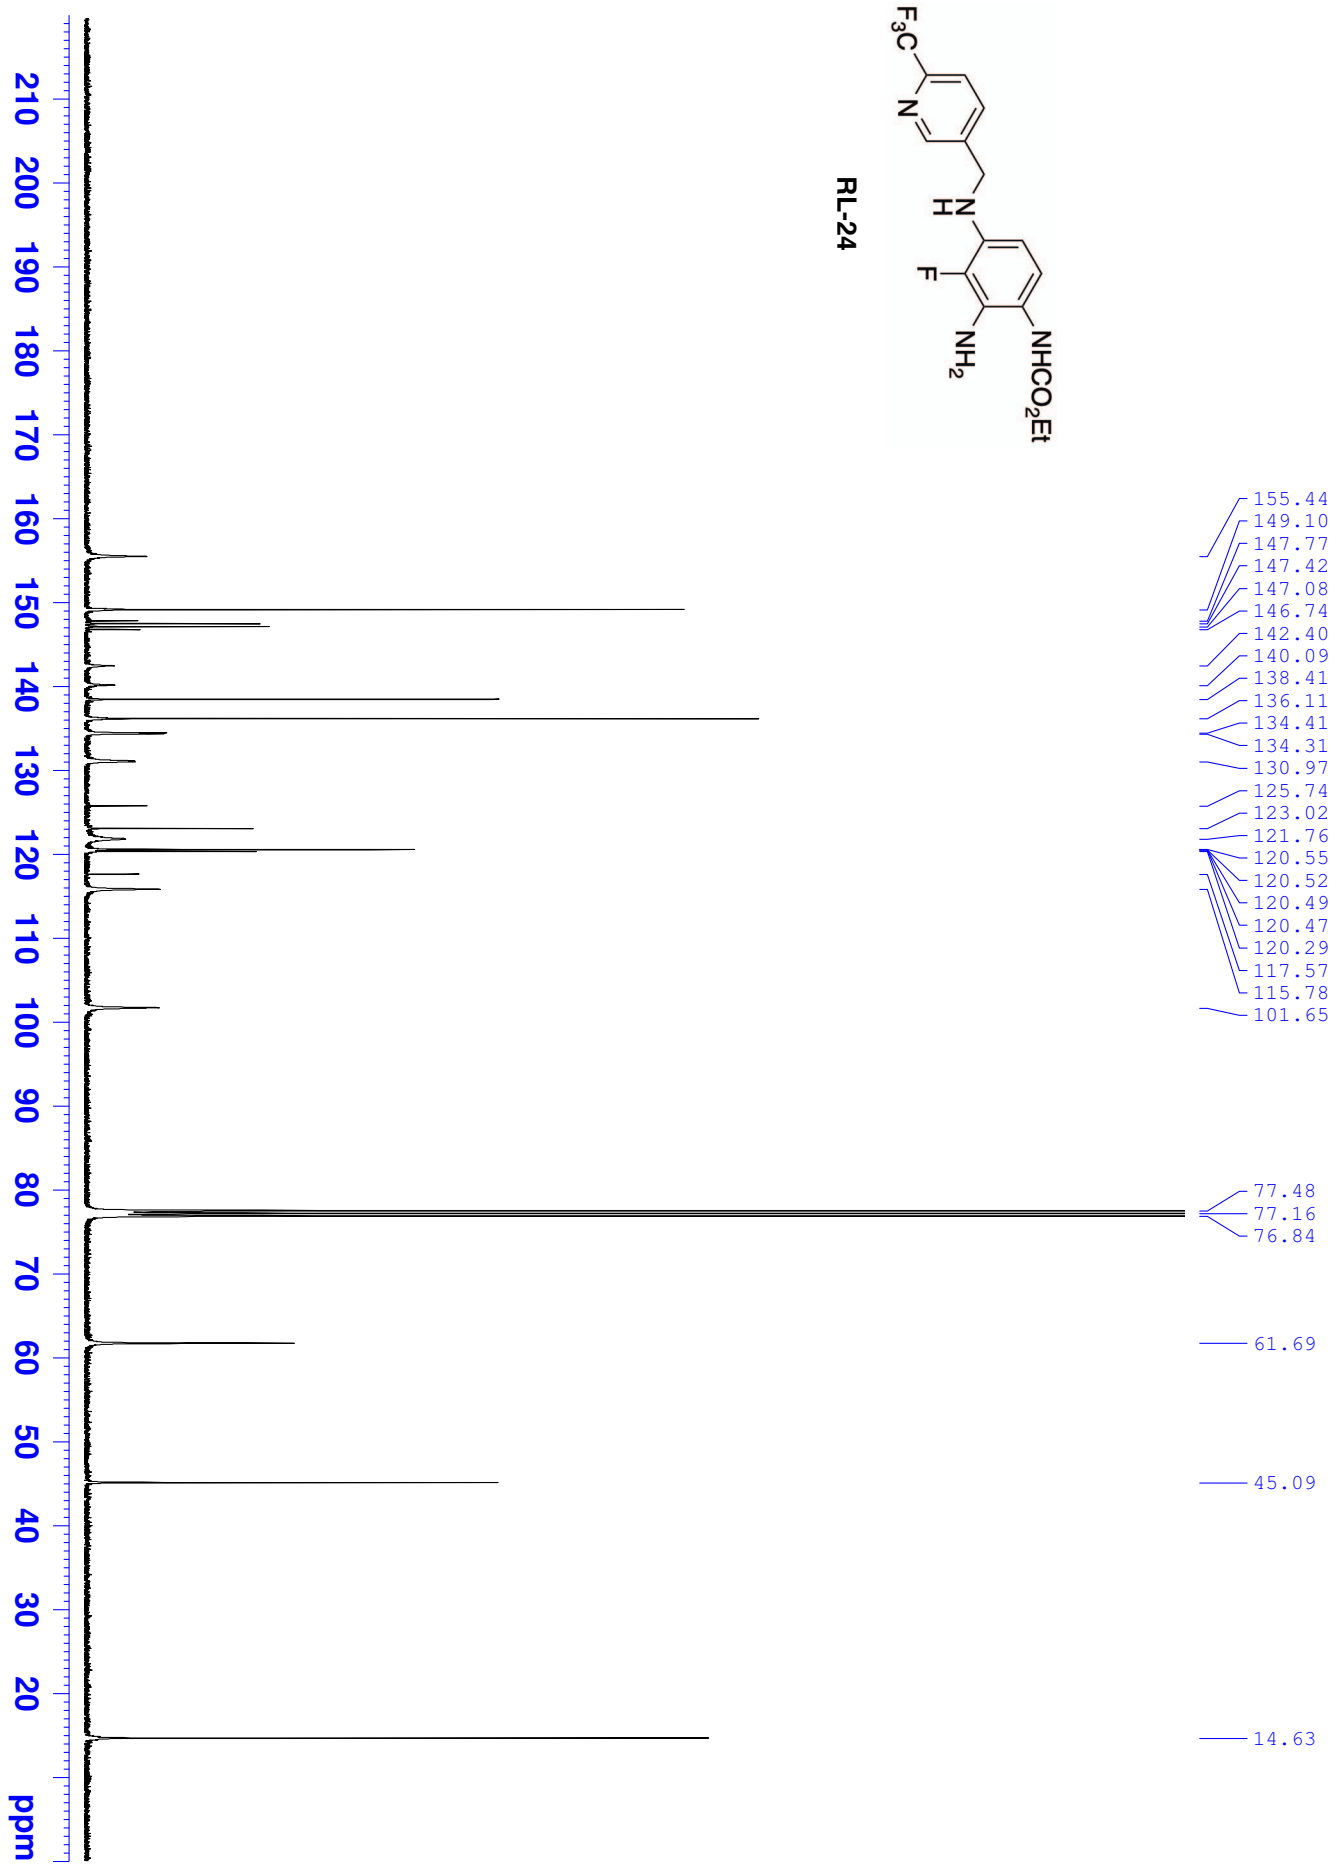



RL844.067 acetone-d6 600Mhz

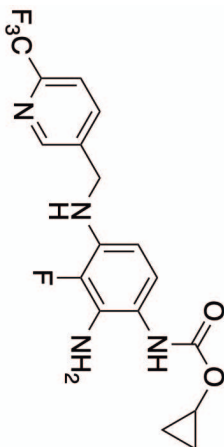

RL-67

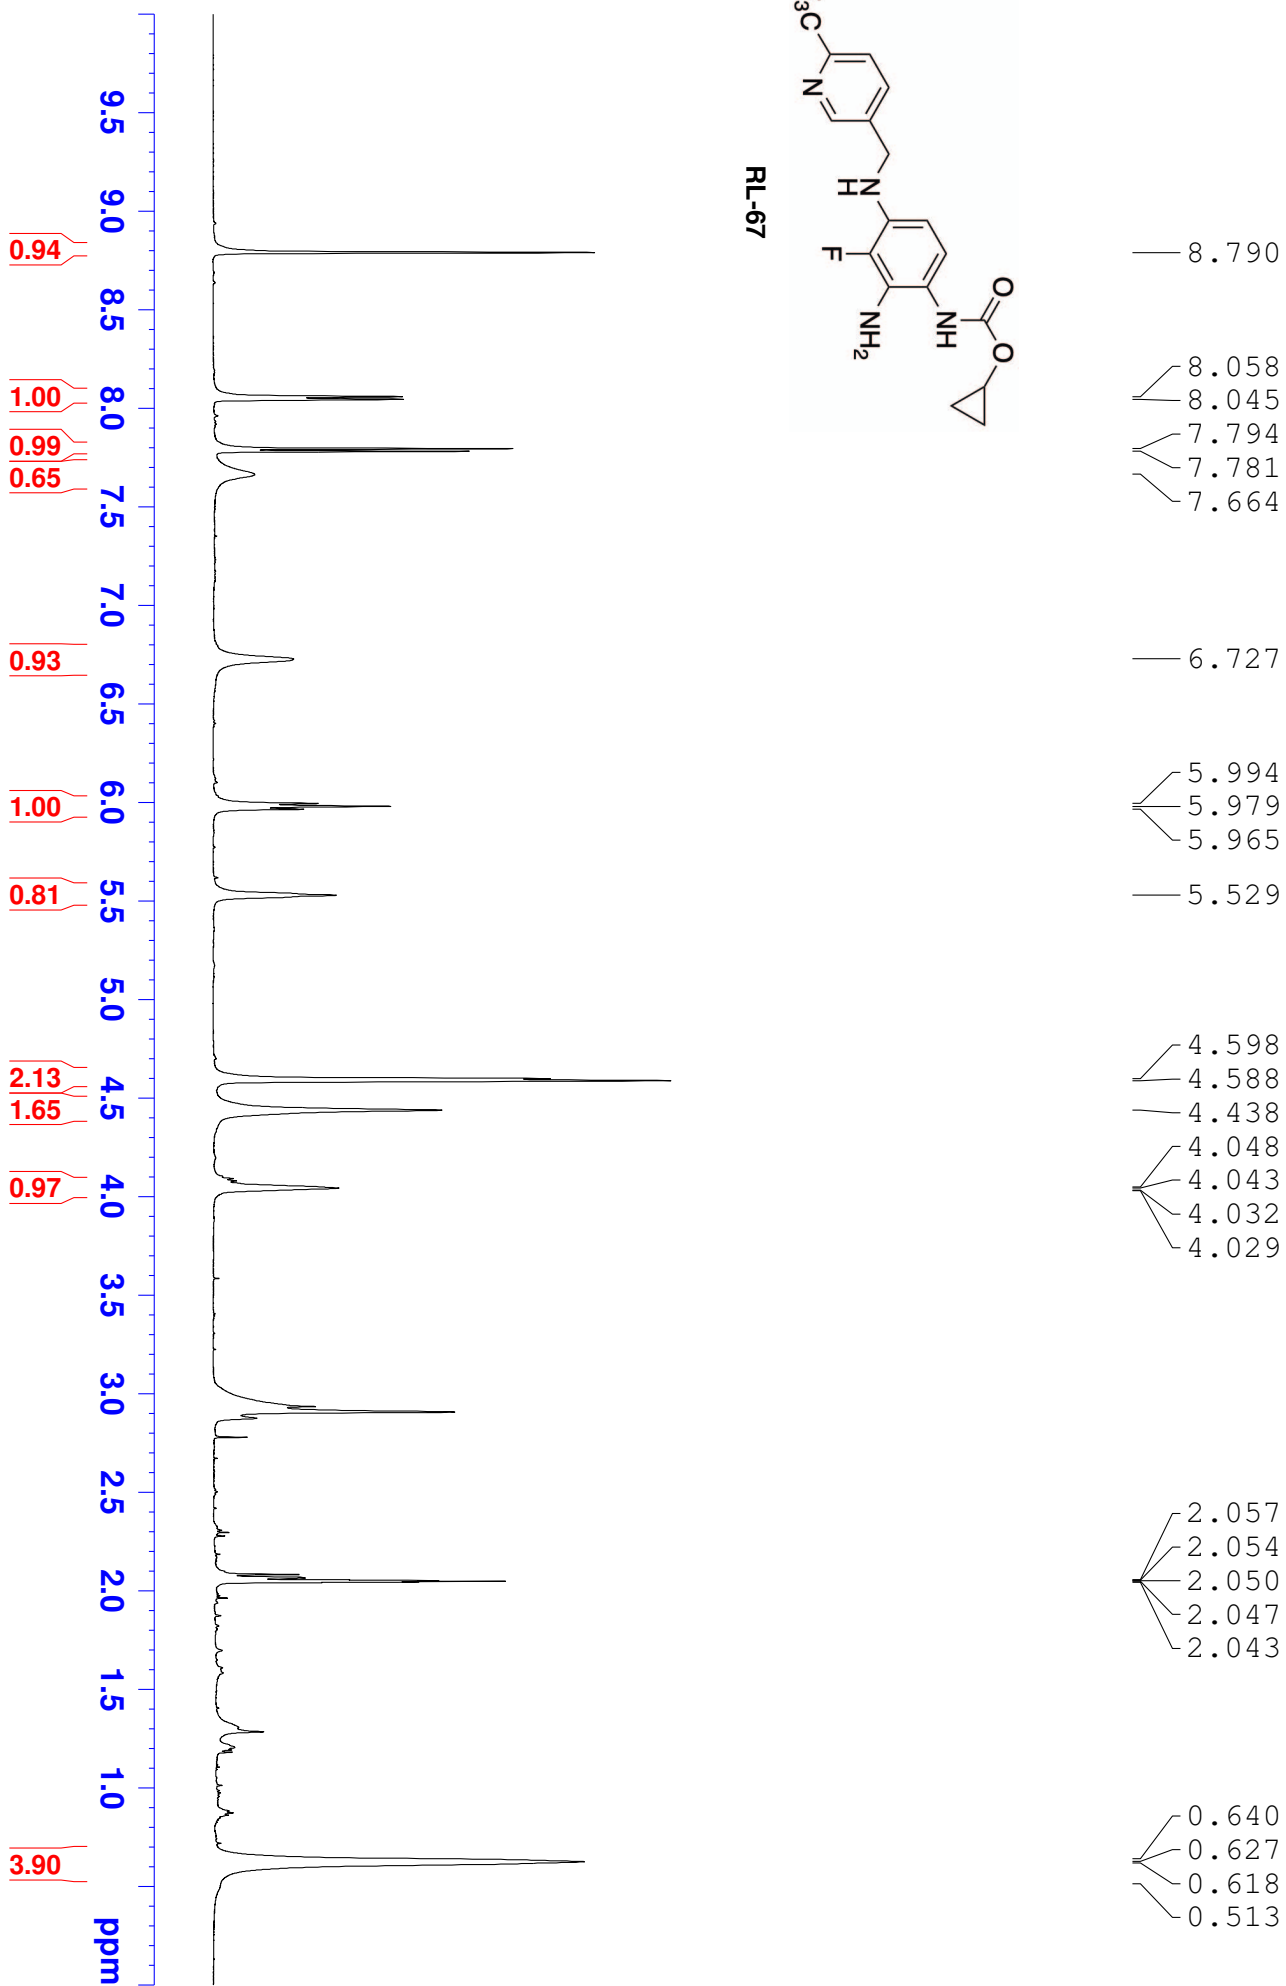

acetone-d6

RL844.067 acetone-d6 600MHz

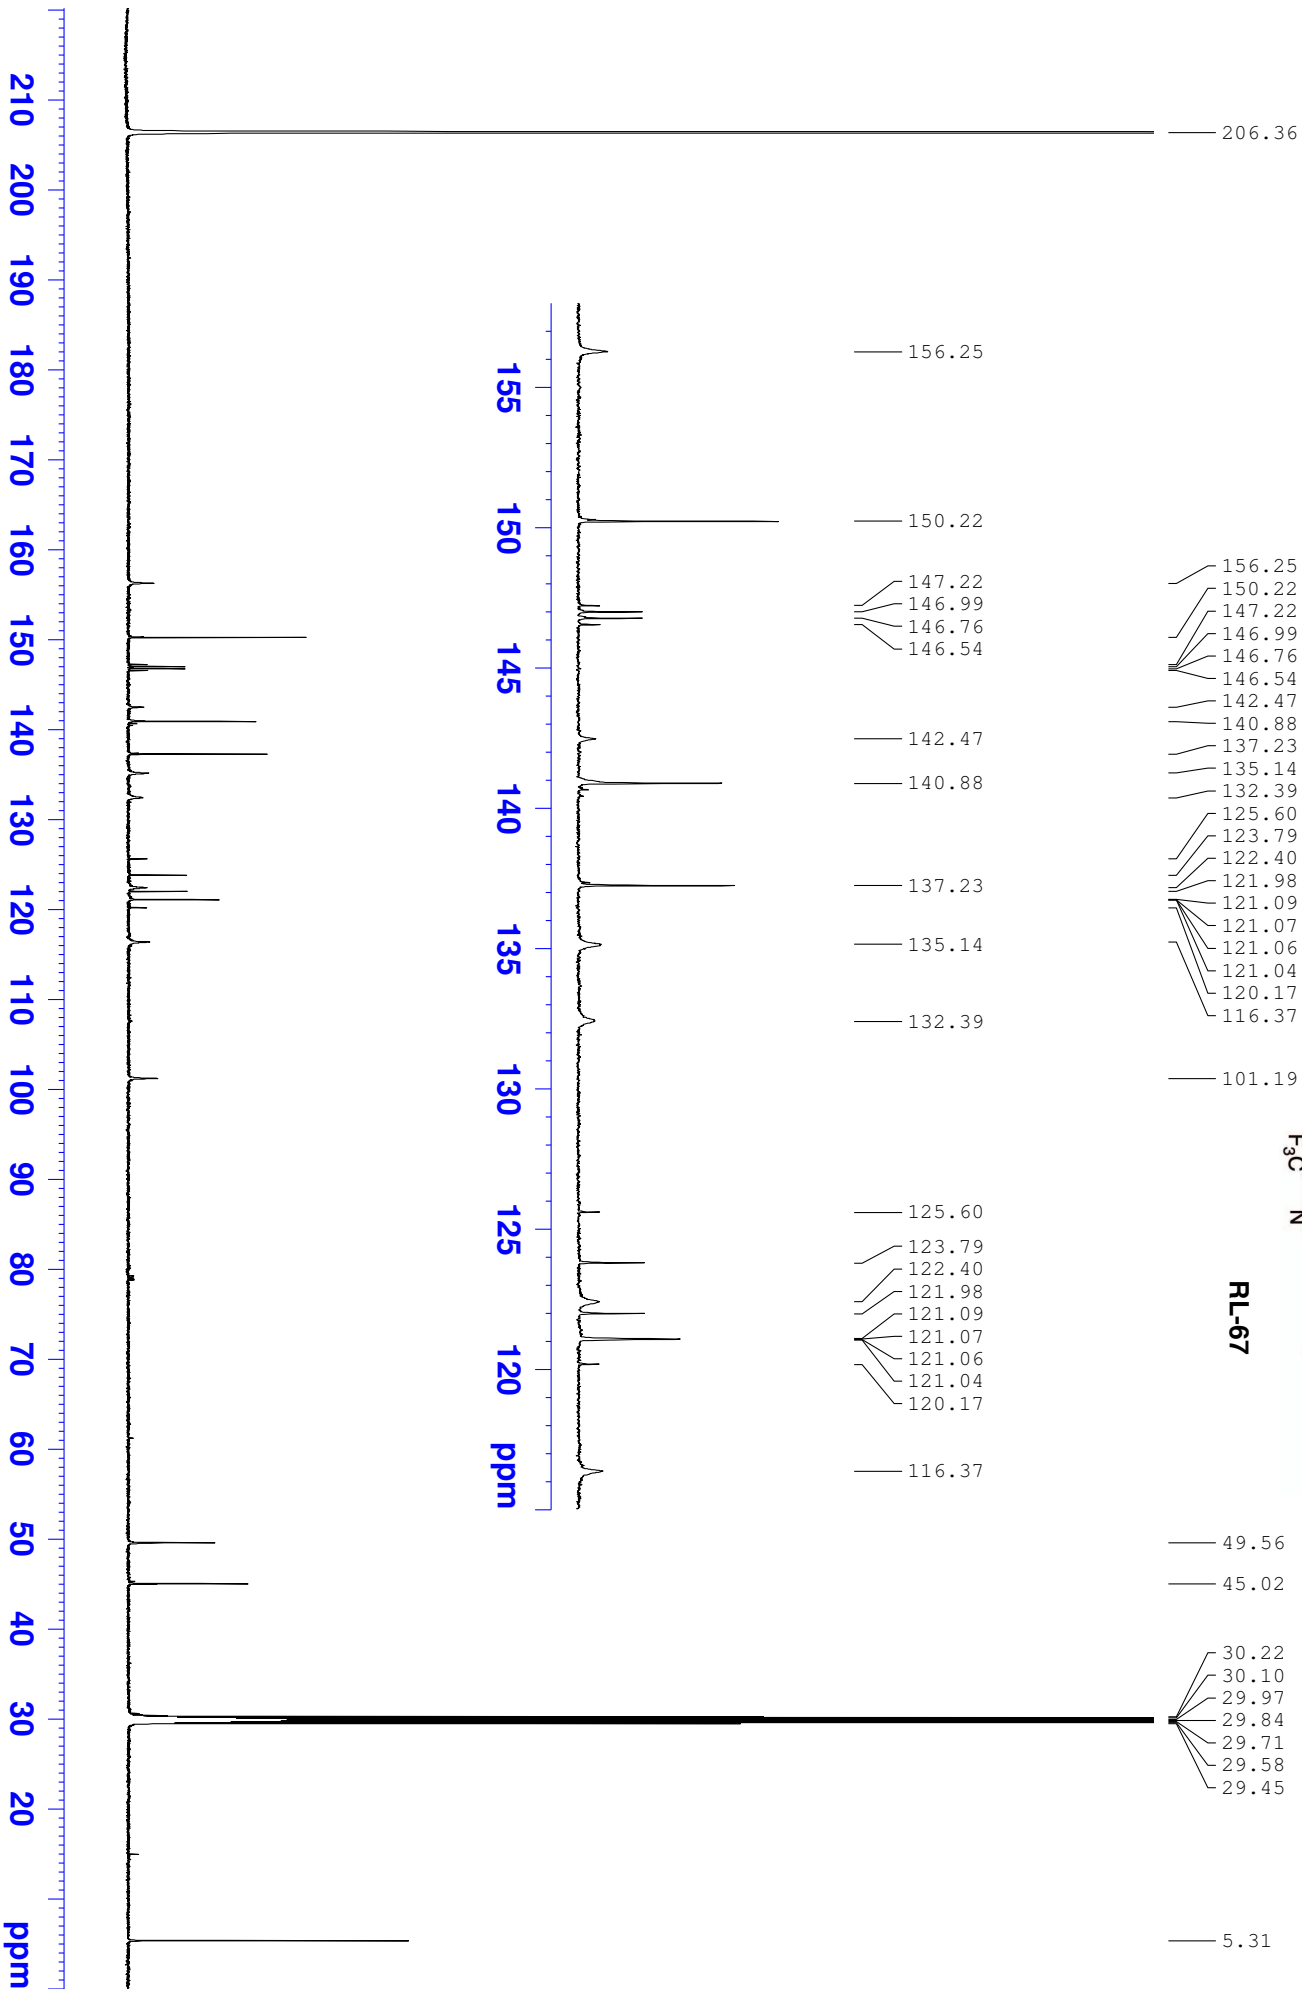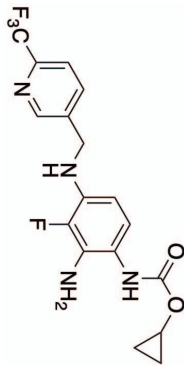

acetone-d6

RL783.004 CDCl3 400a

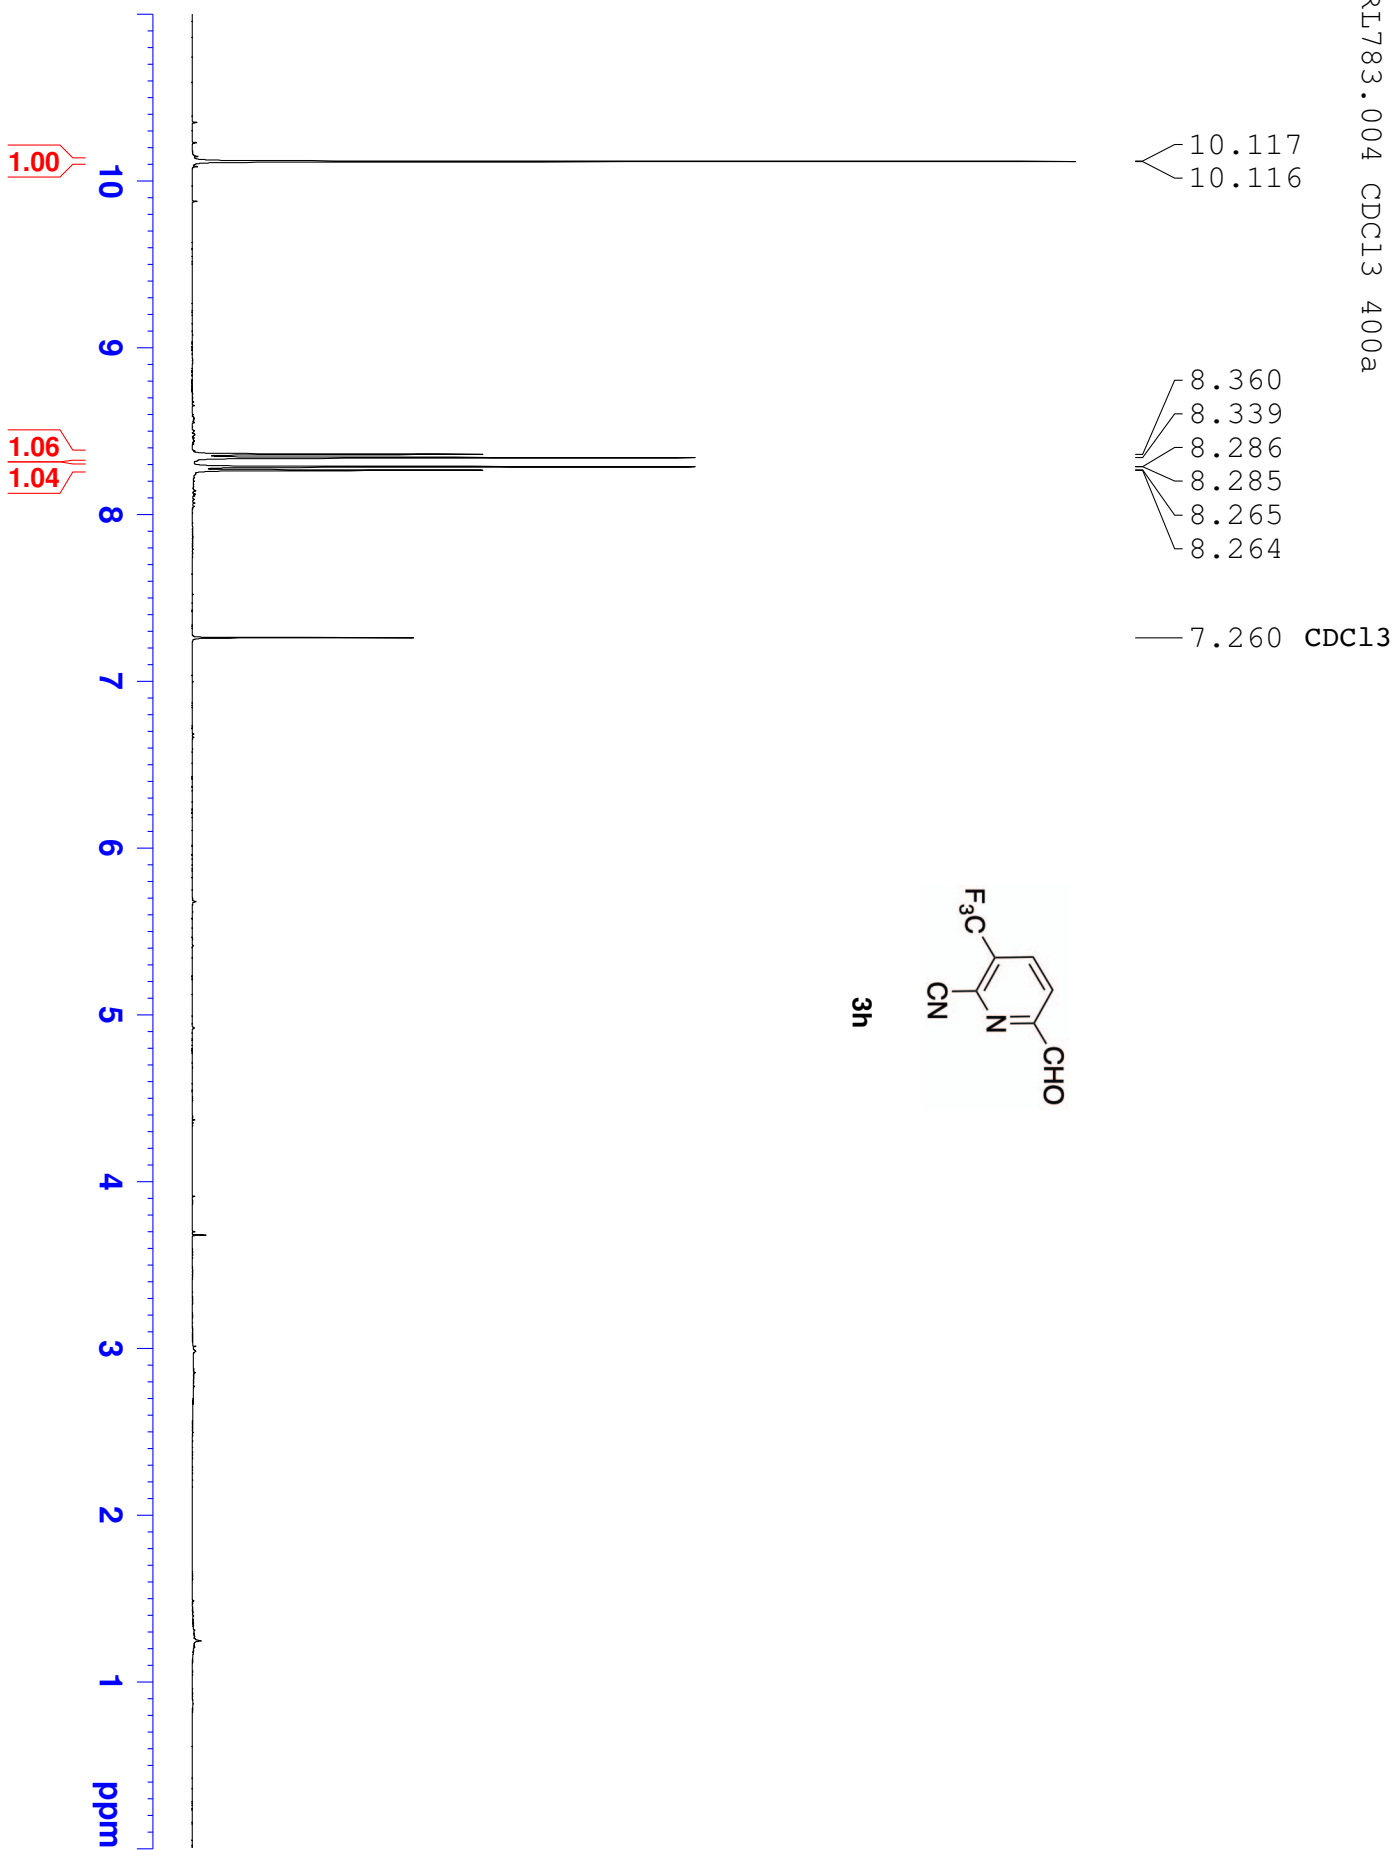

RL783.004 CDCl3 400b

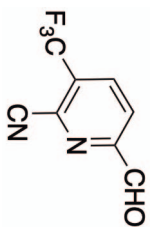

3h

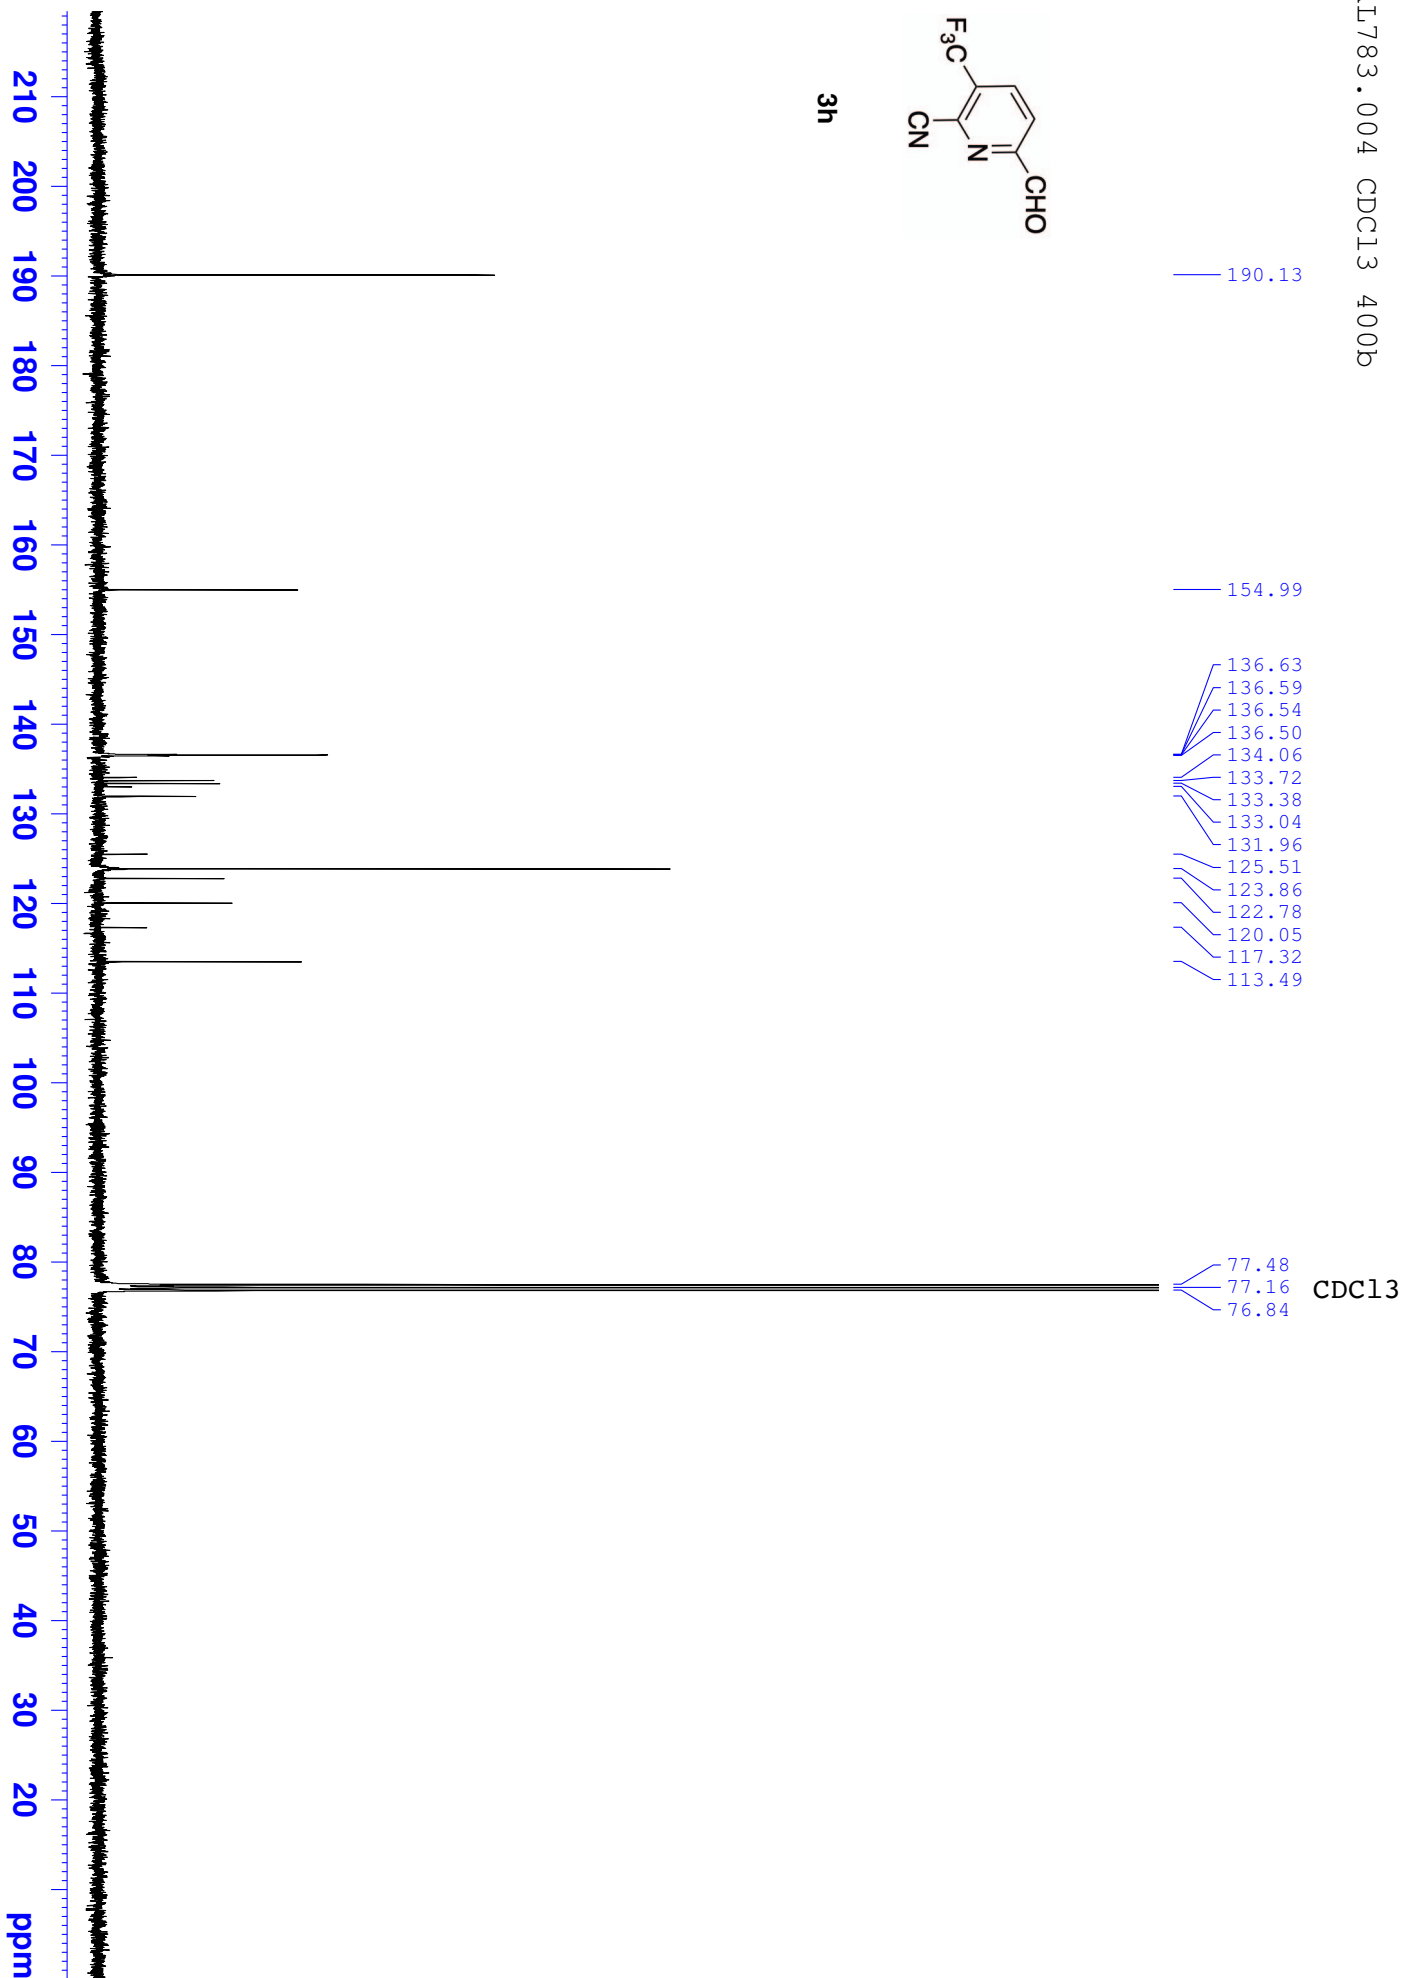

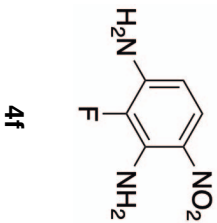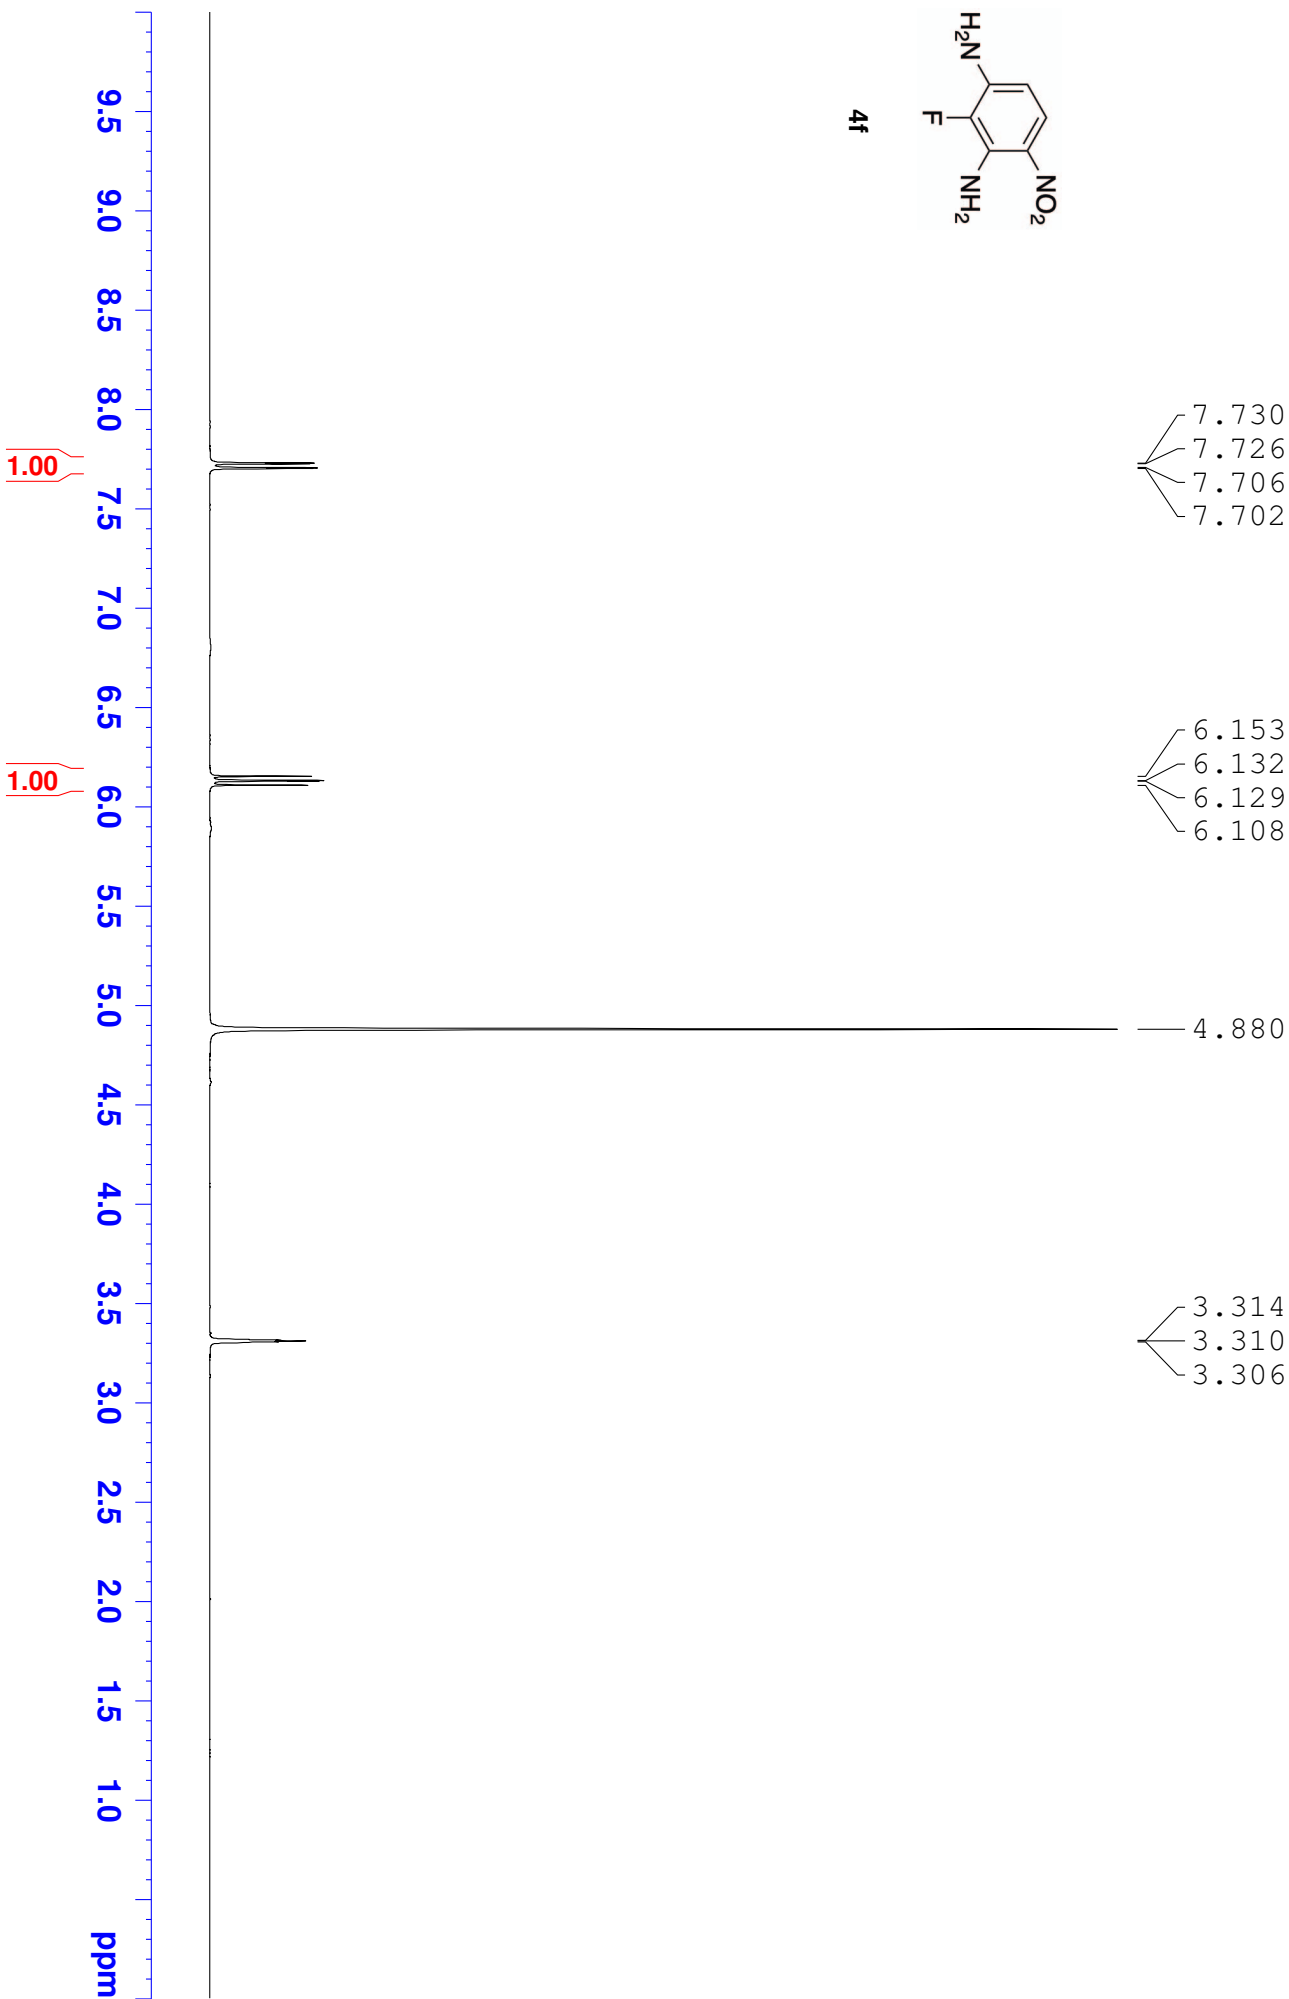

CD3OD

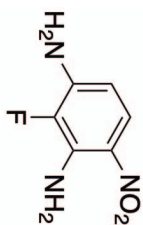

4f

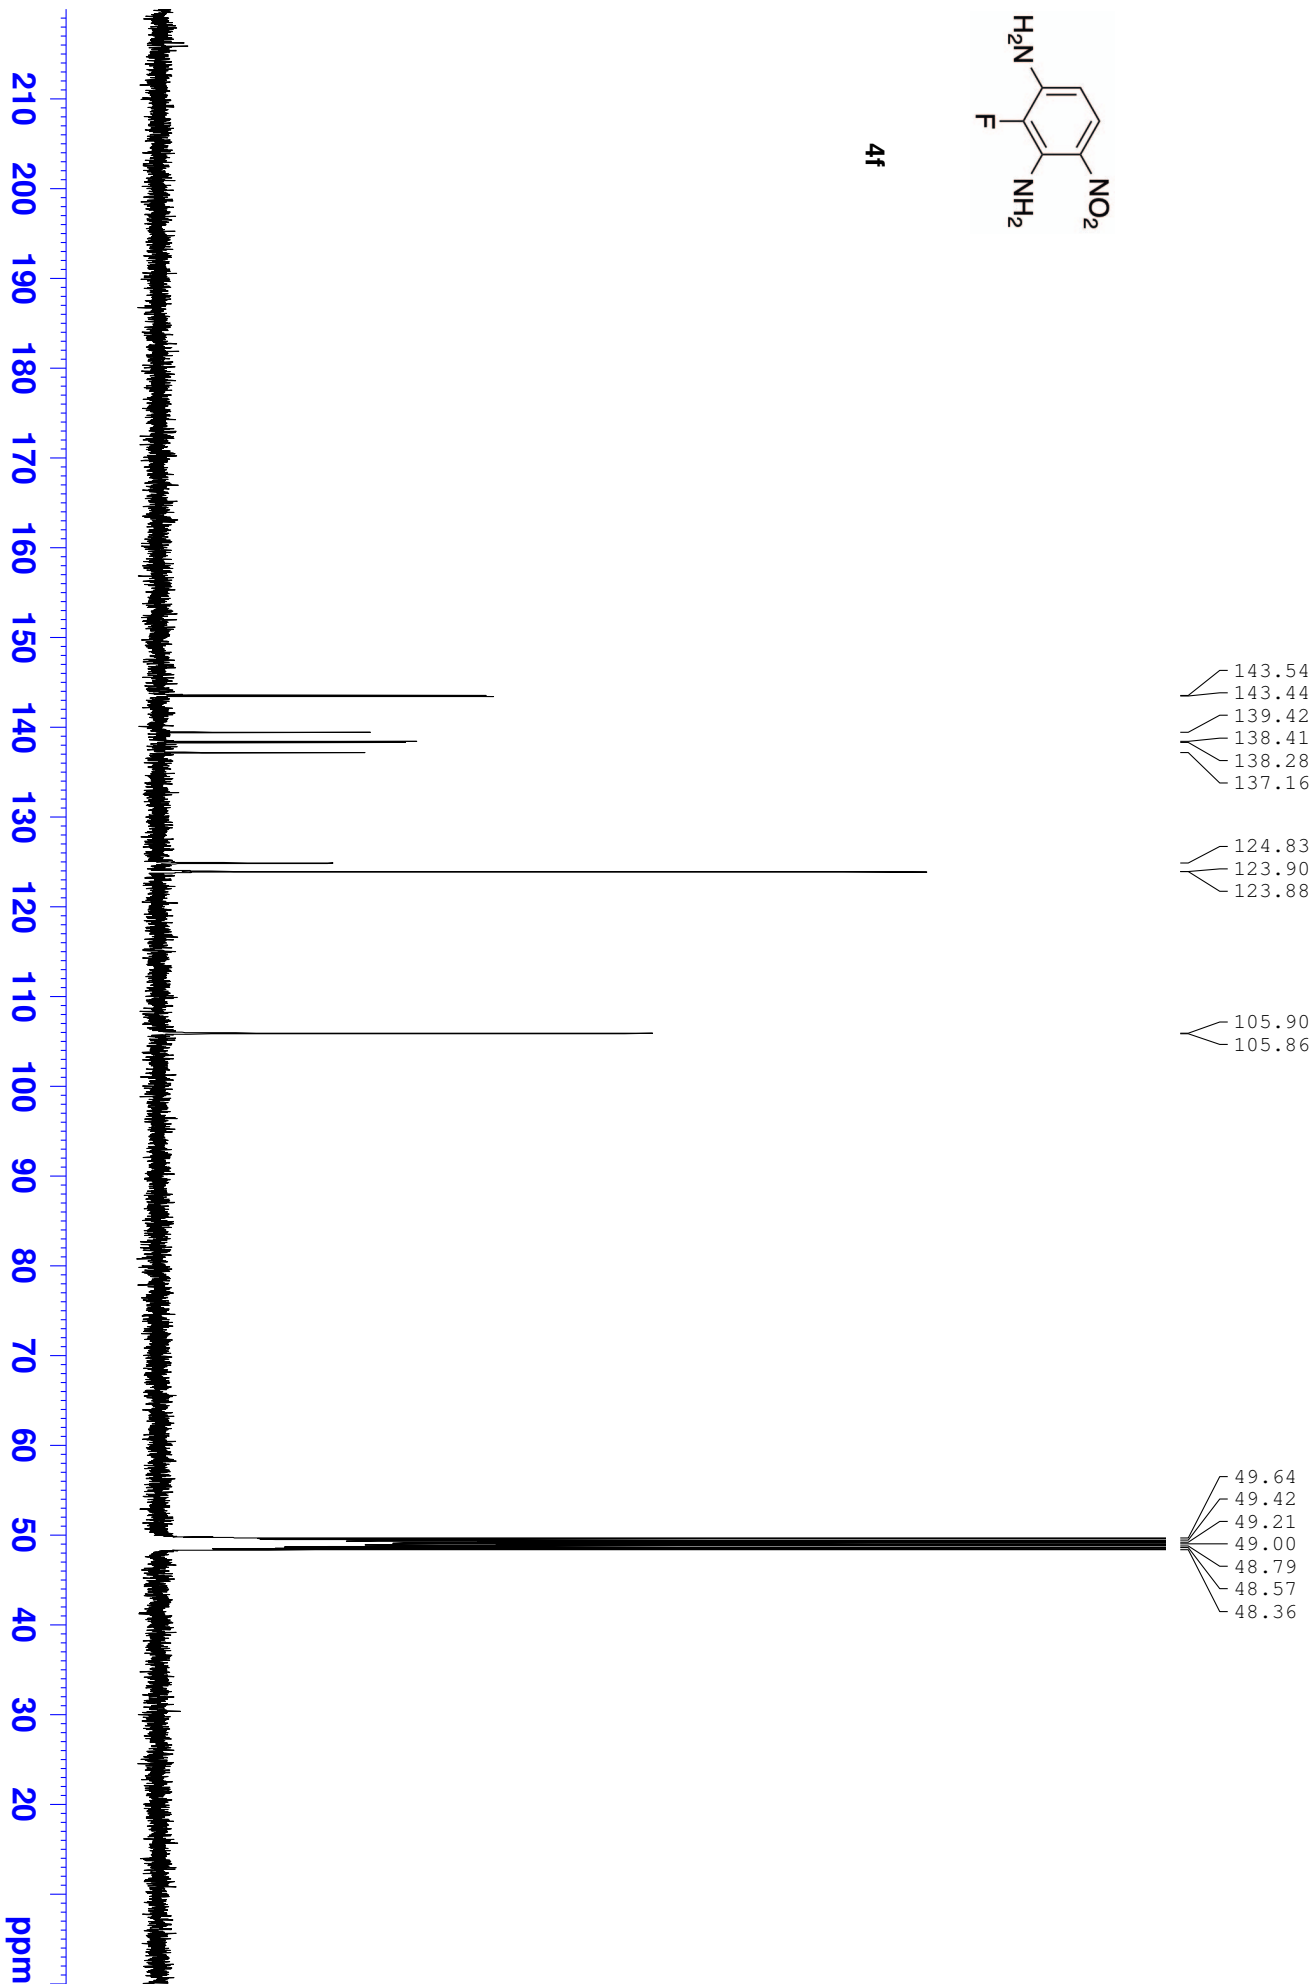

CD30D

RL783.046 acetone-d6 400b

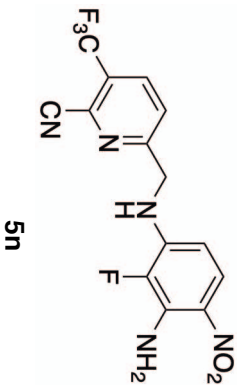

- 8.448
- 8.427
- 8.047
- 8.026
- 7.805
- 7.801
- 7.781
- 7.777
- 6.746
- 6.242
- 6.221
- 6.218
- 6.198
- 4.914
- 4.899
- 2.902
- 2.101
- 2.095
- 2.090
- 2.085
- 2.079

acetone-d6

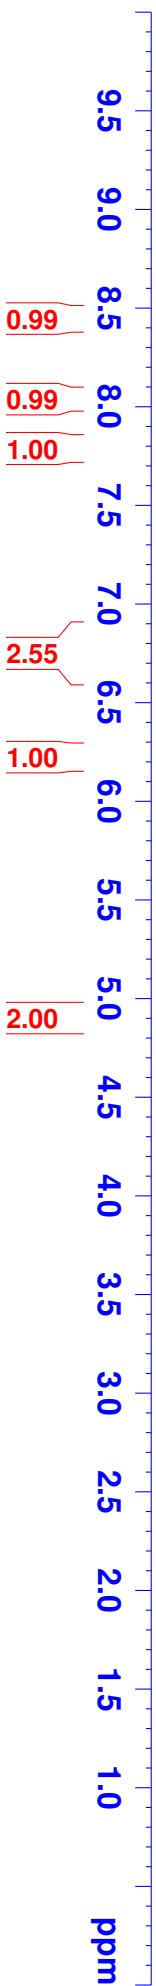

RL783.046 acetone-d6 400b

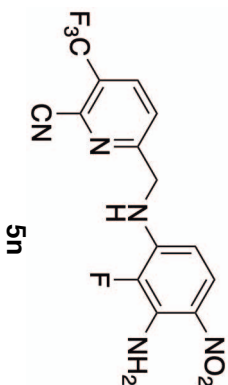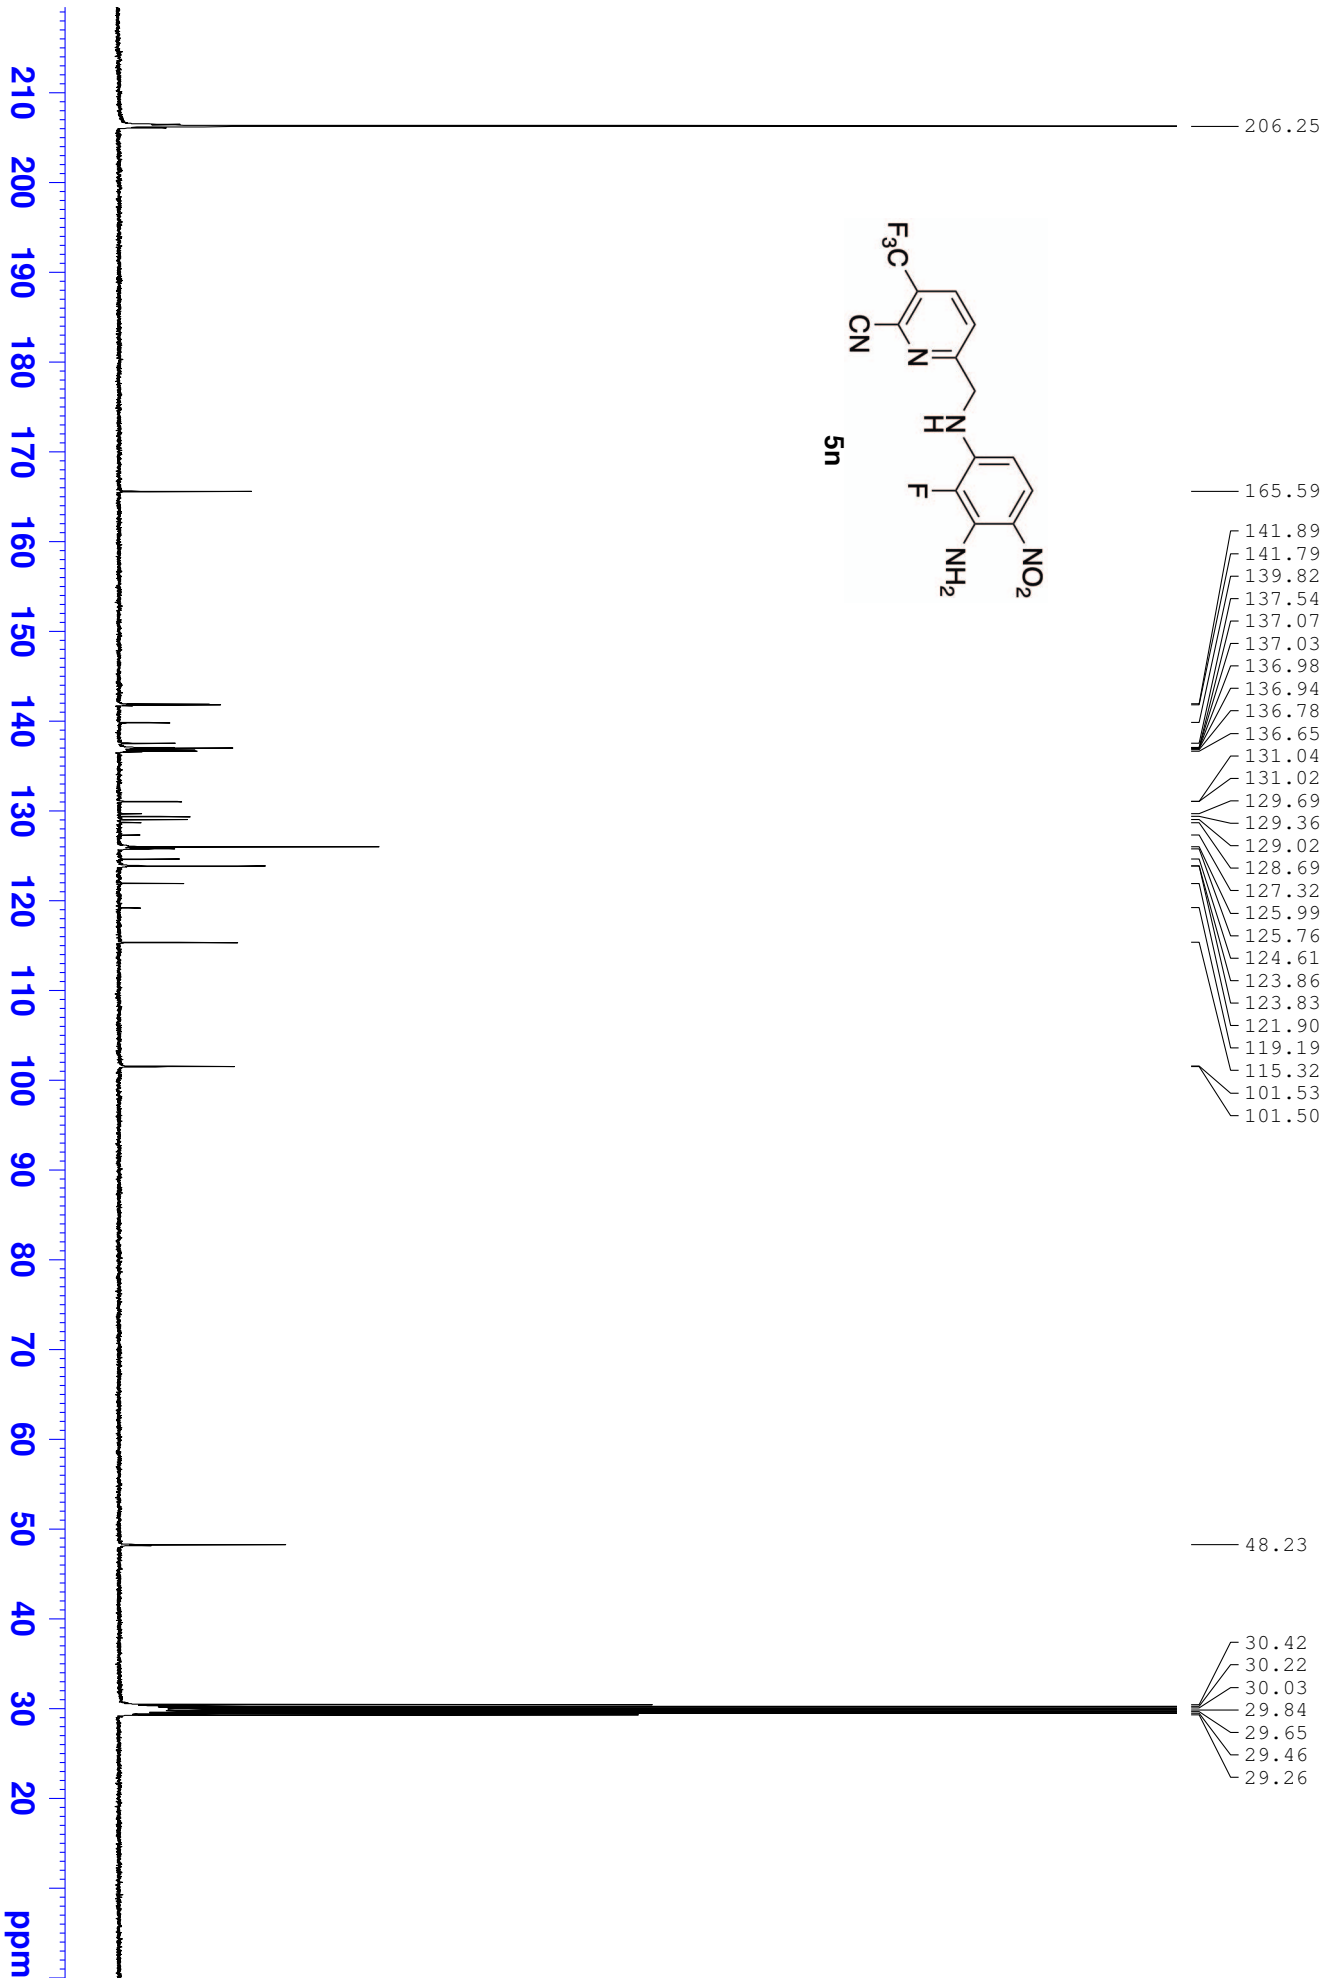



RL783.023 CDCl3 500MHz

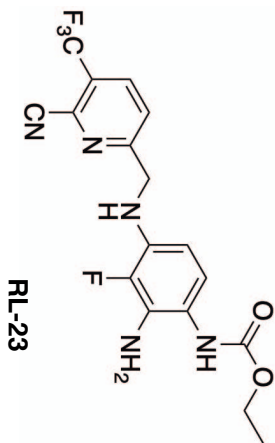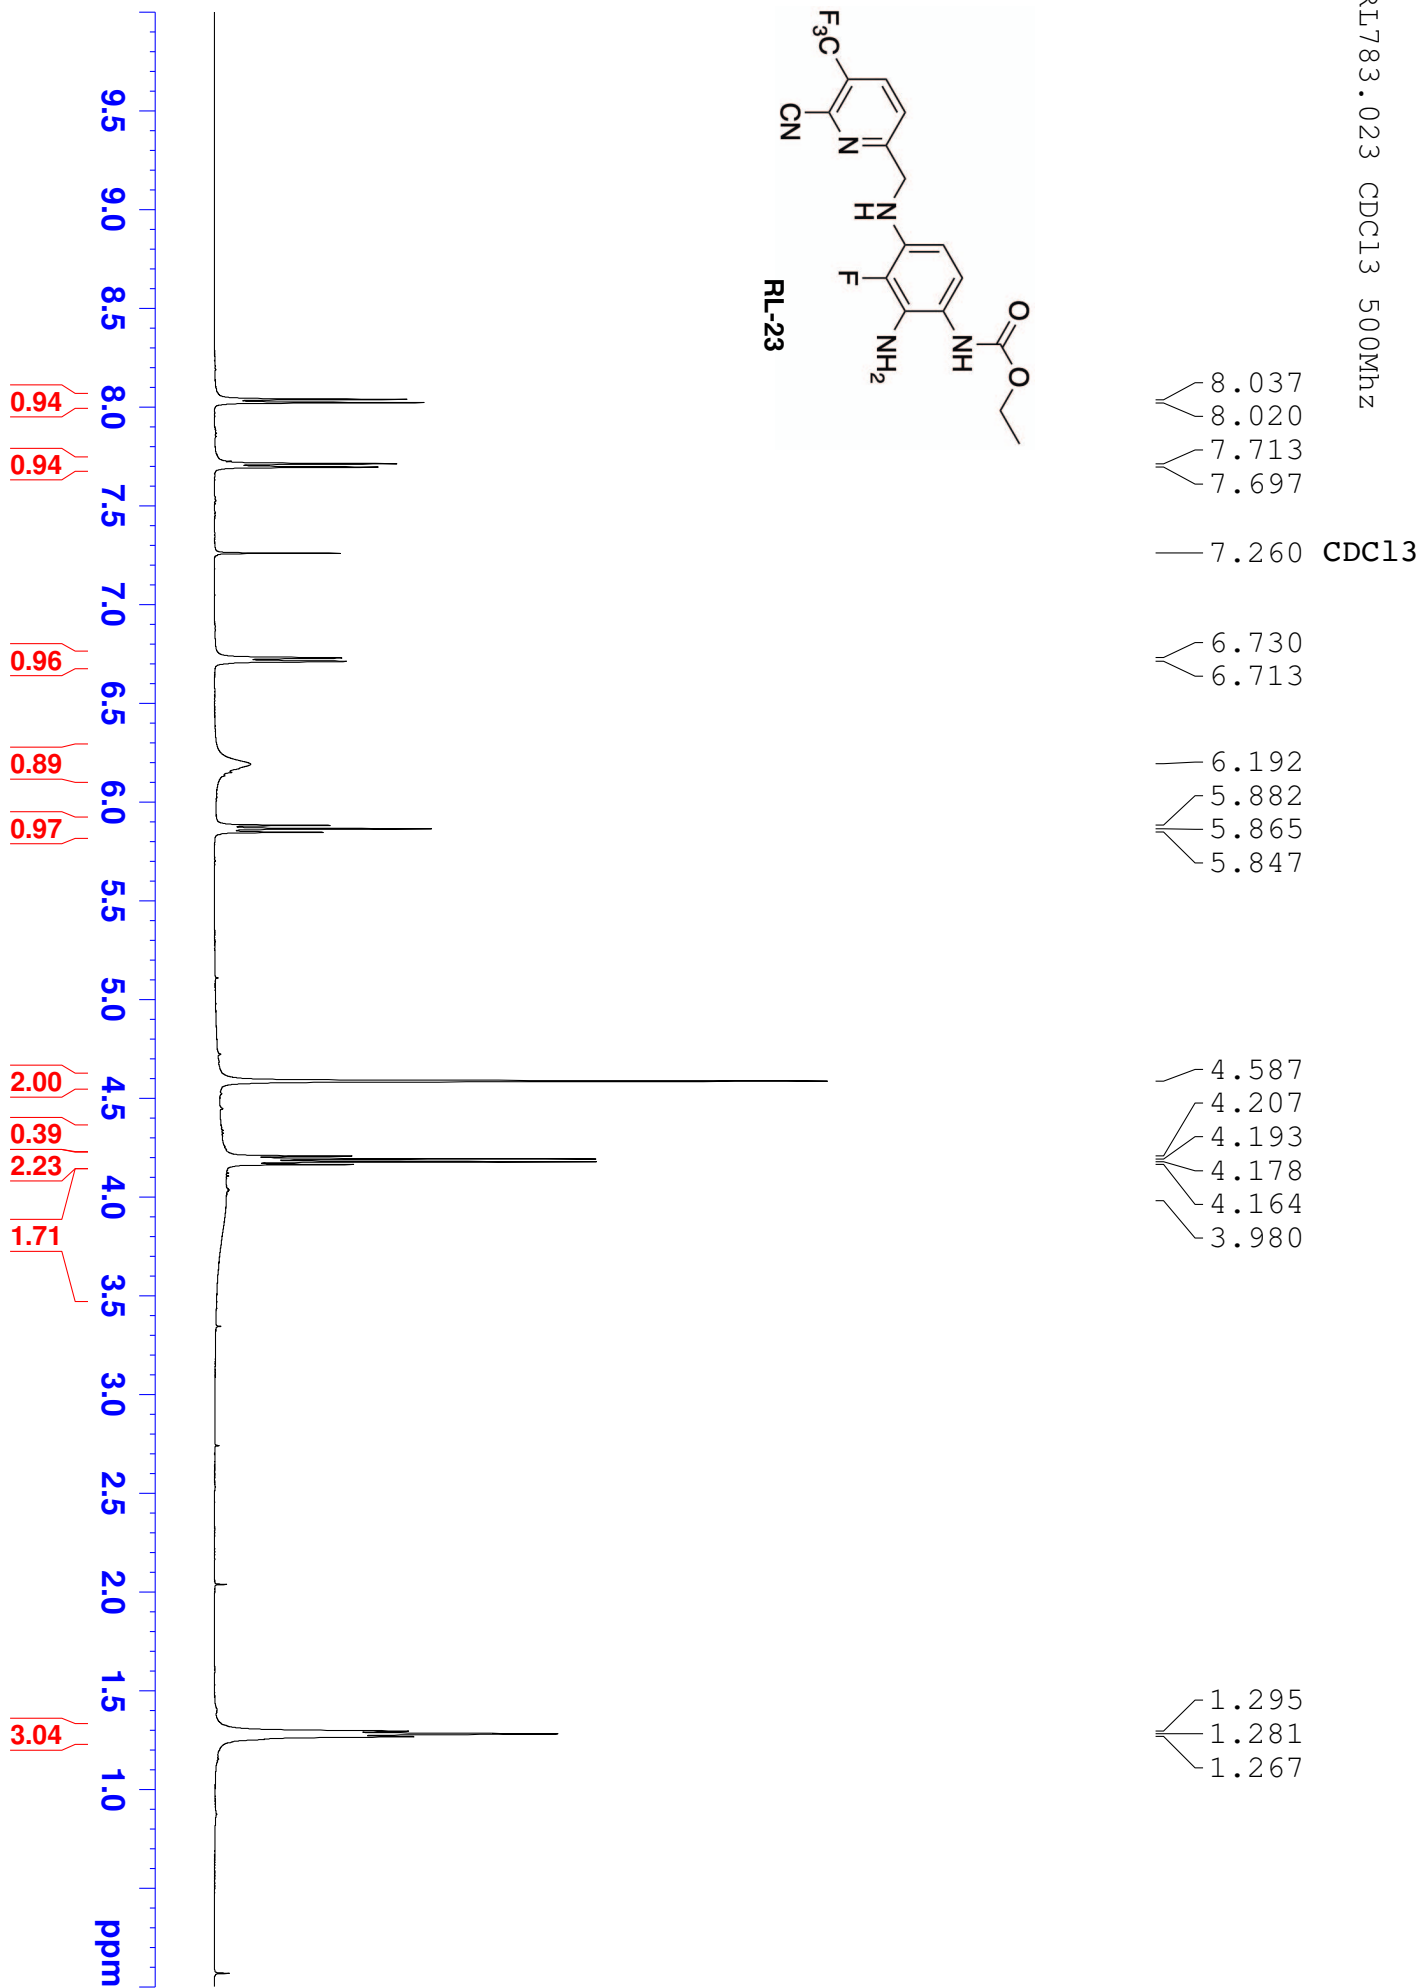

RL783.023 CDCl3 400a

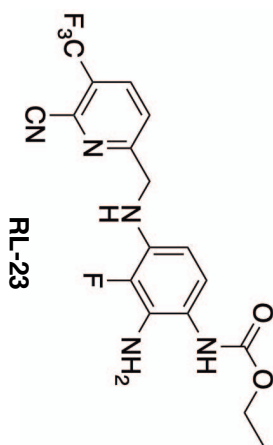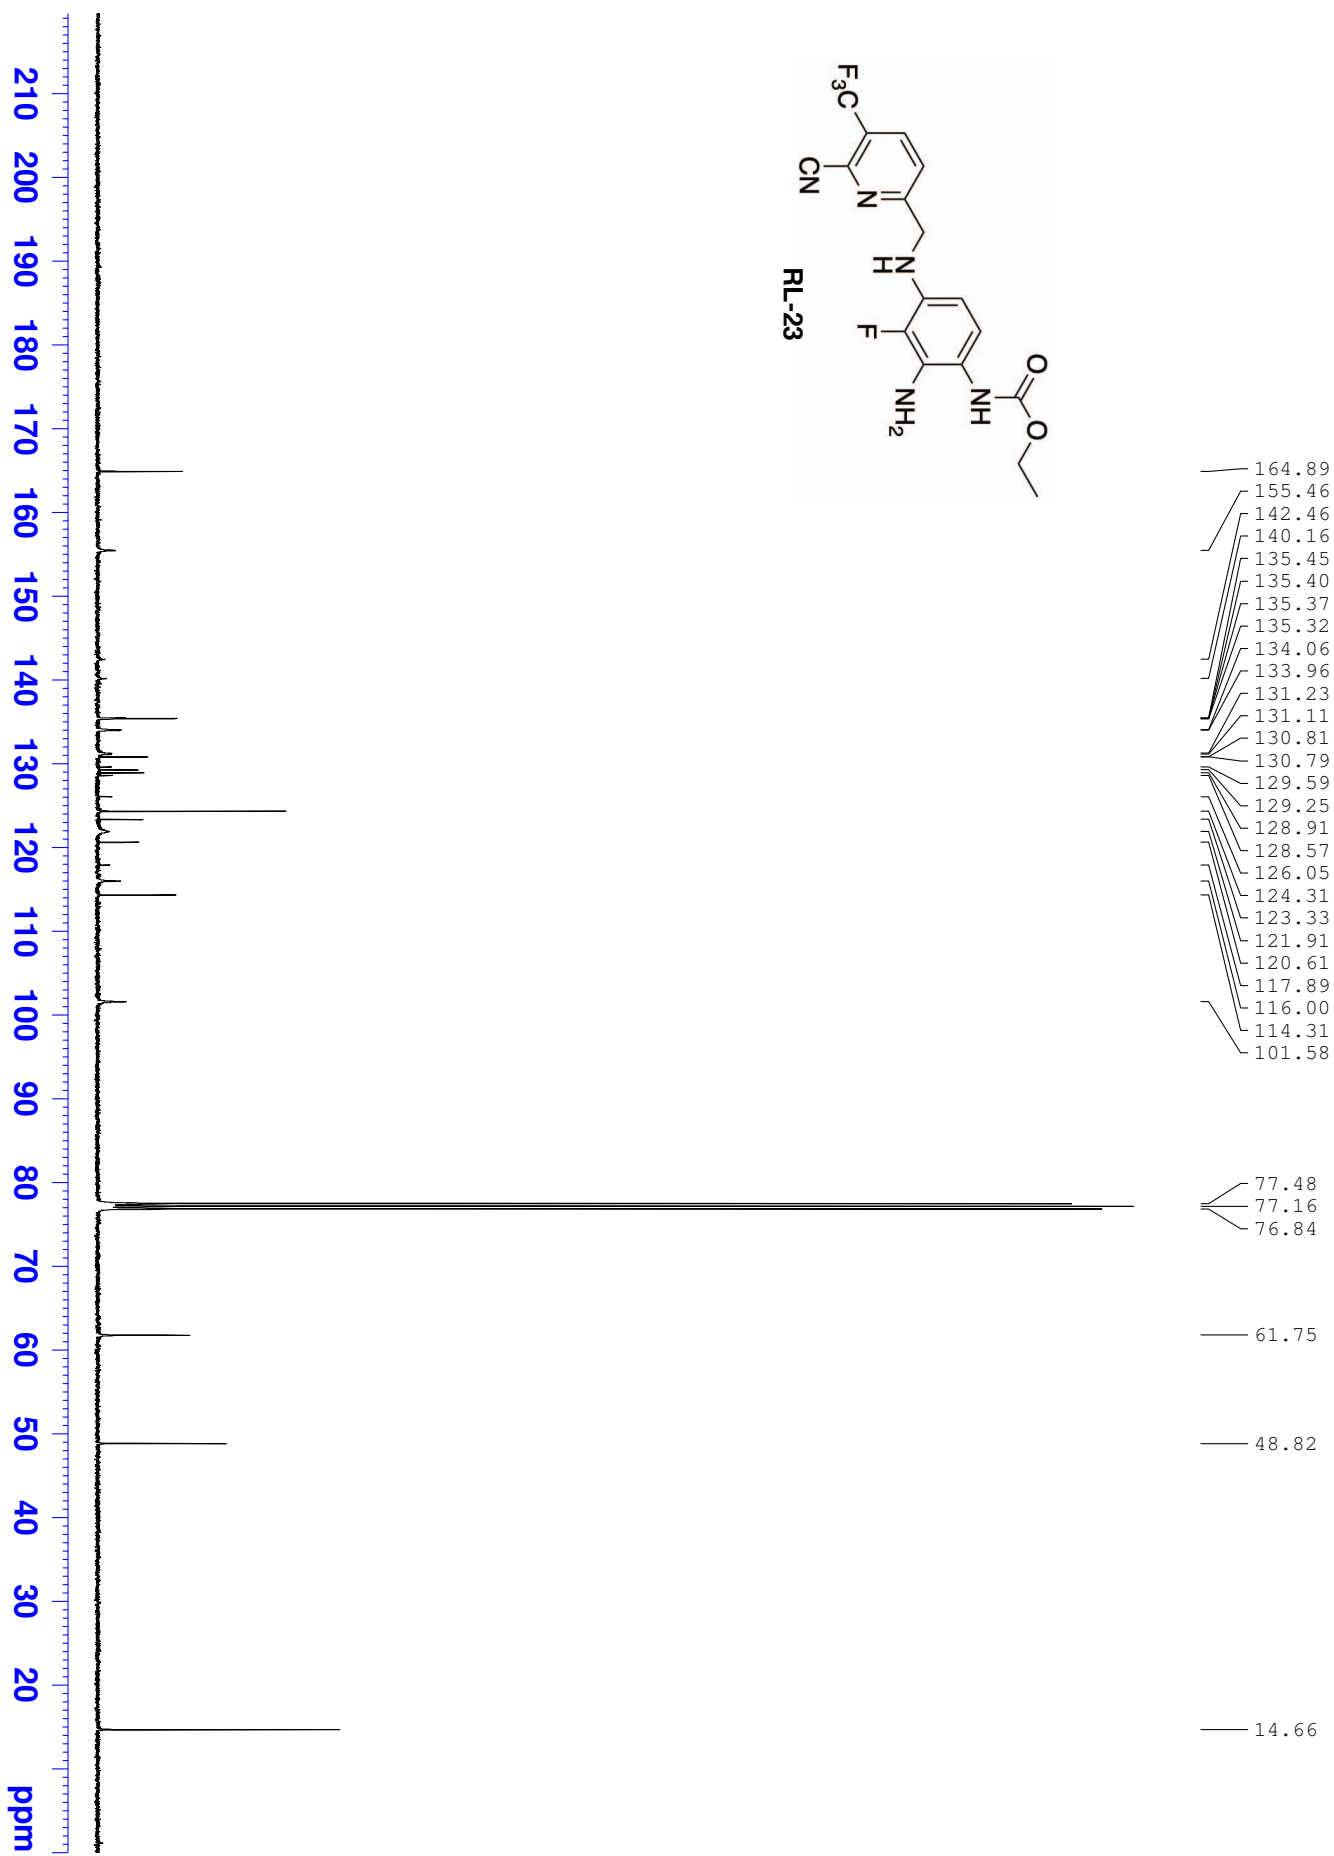

Supplement: ml9b00097_si_001.pdf [file ml9b00097_si_001.pdf]
